# Supplementary material
Source: publisher figshare collection journal article supplement (https://gsapubs.figshare.com/ndownloader/files/34594562)
Supplement: Supplementary file 1 [file 34594562]

## Sheet: PlotDat1
Source sheet	data	620	0
Plot name	ProbDens1	620.11	0
Plot Type	16	620.22	1.51794e-08
1st free col	5	620.33	1.58534e-08
Sigma Level	2	620.44	1.65558e-08
Absolute Errs	TRUE	620.55	1.72877e-08
Symbol Type	5	620.66	1.80504e-08
Inverse Plot	FALSE	620.77	1.8845e-08
Color Plot	FALSE	620.88	1.96729e-08
3D plot	FALSE	620.99	2.05352e-08
Linear	FALSE	621.1	2.14334e-08
Data Range	AD7:AE72	621.21	2.23688e-08
Filled Symbols	TRUE	621.32	2.3343e-08
ConcAge	FALSE	621.43	2.43574e-08
ConcSwap	FALSE	621.54	2.54135e-08
1st Symbol-row	1	621.65	2.65131e-08
		621.76	2.76577e-08
		621.87	2.88492e-08
		621.98	3.00892e-08
		622.09	3.13797e-08
		622.2	3.27226e-08
		622.31	3.41199e-08
		622.42	3.55736e-08
		622.53	3.70859e-08
		622.64	3.8659e-08
		622.75	4.02951e-08
		622.86	4.19967e-08
		622.97	4.37662e-08
		623.08	4.56061e-08
		623.19	4.75191e-08
		623.3	4.95079e-08
		623.41	5.15752e-08
		623.52	5.37239e-08
		623.63	5.59571e-08
		623.74	5.82779e-08
		623.85	6.06894e-08
		623.96	6.3195e-08
		624.07	6.57981e-08
		624.18	6.85022e-08
		624.29	7.1311e-08
		624.4	7.42283e-08
		624.51	7.72578e-08
		624.62	8.04038e-08
		624.73	8.36703e-08
		624.84	8.70616e-08
		624.95	9.05822e-08
		625.06	9.42366e-08
		625.17	9.80295e-08
		625.28	1.01966e-07
		625.39	1.06051e-07
		625.5	1.10289e-07
		625.61	1.14687e-07
		625.72	1.19249e-07
		625.83	1.23981e-07
		625.94	1.2889e-07
		626.05	1.3398e-07
		626.16	1.3926e-07
		626.27	1.44734e-07
		626.38	1.50409e-07
		626.49	1.56293e-07
		626.6	1.62393e-07
		626.71	1.68715e-07
		626.82	1.75267e-07
		626.93	1.82058e-07
		627.04	1.89095e-07
		627.15	1.96385e-07
		627.26	2.03939e-07
		627.37	2.11763e-07
		627.48	2.19868e-07
		627.59	2.28263e-07
		627.7	2.36956e-07
		627.81	2.45959e-07
		627.92	2.5528e-07
		628.03	2.64931e-07
		628.14	2.74921e-07
		628.25	2.85263e-07
		628.36	2.95967e-07
		628.47	3.07044e-07
		628.58	3.18508e-07
		628.69	3.30369e-07
		628.8	3.42641e-07
		628.91	3.55337e-07
		629.02	3.6847e-07
		629.13	3.82053e-07
		629.24	3.96102e-07
		629.35	4.1063e-07
		629.46	4.25652e-07
		629.57	4.41184e-07
		629.68	4.57242e-07
		629.79	4.73841e-07
		629.9	4.90998e-07
		630.01	5.0873e-07
		630.12	5.27055e-07
		630.23	5.4599e-07
		630.34	5.65555e-07
		630.45	5.85767e-07
		630.56	6.06648e-07
		630.67	6.28215e-07
		630.78	6.5049e-07
		630.89	6.73495e-07
		631	6.9725e-07
		631.11	7.21777e-07
		631.22	7.47099e-07
		631.33	7.7324e-07
		631.44	8.00223e-07
		631.55	8.28073e-07
		631.66	8.56814e-07
		631.77	8.86473e-07
		631.88	9.17075e-07
		631.99	9.48648e-07
		632.1	9.81219e-07
		632.21	1.01482e-06
		632.32	1.04947e-06
		632.43	1.08521e-06
		632.54	1.12206e-06
		632.65	1.16006e-06
		632.76	1.19924e-06
		632.87	1.23963e-06
		632.98	1.28126e-06
		633.09	1.32417e-06
		633.2	1.3684e-06
		633.31	1.41397e-06
		633.42	1.46093e-06
		633.53	1.50932e-06
		633.64	1.55916e-06
		633.75	1.61051e-06
		633.86	1.66339e-06
		633.97	1.71786e-06
		634.08	1.77394e-06
		634.19	1.8317e-06
		634.3	1.89116e-06
		634.41	1.95238e-06
		634.52	2.01539e-06
		634.63	2.08026e-06
		634.74	2.14701e-06
		634.85	2.21571e-06
		634.96	2.28639e-06
		635.07	2.35912e-06
		635.18	2.43395e-06
		635.29	2.51091e-06
		635.4	2.59008e-06
		635.51	2.6715e-06
		635.62	2.75523e-06
		635.73	2.84133e-06
		635.84	2.92986e-06
		635.95	3.02087e-06
		636.06	3.11442e-06
		636.17	3.21058e-06
		636.28	3.30941e-06
		636.39	3.41097e-06
		636.5	3.51534e-06
		636.61	3.62256e-06
		636.72	3.73272e-06
		636.83	3.84589e-06
		636.94	3.96212e-06
		637.05	4.0815e-06
		637.16	4.20409e-06
		637.27	4.32998e-06
		637.38	4.45923e-06
		637.49	4.59192e-06
		637.6	4.72813e-06
		637.71	4.86794e-06
		637.82	5.01144e-06
		637.93	5.15869e-06
		638.04	5.3098e-06
		638.15	5.46483e-06
		638.26	5.62388e-06
		638.37	5.78704e-06
		638.48	5.95439e-06
		638.59	6.12603e-06
		638.7	6.30204e-06
		638.81	6.48252e-06
		638.92	6.66757e-06
		639.03	6.85728e-06
		639.14	7.05175e-06
		639.25	7.25108e-06
		639.36	7.45537e-06
		639.47	7.66472e-06
		639.58	7.87923e-06
		639.69	8.09902e-06
		639.8	8.32418e-06
		639.91	8.55483e-06
		640.02	8.79107e-06
		640.13	9.03302e-06
		640.24	9.28079e-06
		640.35	9.53449e-06
		640.46	9.79425e-06
		640.57	1.00602e-05
		640.68	1.03324e-05
		640.79	1.0611e-05
		640.9	1.08961e-05
		641.01	1.11879e-05
		641.12	1.14864e-05
		641.23	1.17919e-05
		641.34	1.21199e-05
		641.45	1.244e-05
		641.56	1.27674e-05
		641.67	1.31023e-05
		641.78	1.34447e-05
		641.89	1.37948e-05
		642	1.41527e-05
		642.11	1.45186e-05
		642.22	1.48926e-05
		642.33	1.52749e-05
		642.44	1.56656e-05
		642.55	1.60648e-05
		642.66	1.64727e-05
		642.77	1.68895e-05
		642.88	1.73152e-05
		642.99	1.775e-05
		643.1	1.81941e-05
		643.21	1.86477e-05
		643.32	1.91108e-05
		643.43	1.95836e-05
		643.54	2.00663e-05
		643.65	2.05591e-05
		643.76	2.10621e-05
		643.87	2.15754e-05
		643.98	2.20992e-05
		644.09	2.26337e-05
		644.2	2.31791e-05
		644.31	2.37354e-05
		644.42	2.43029e-05
		644.53	2.48817e-05
		644.64	2.5472e-05
		644.75	2.60739e-05
		644.86	2.66876e-05
		644.97	2.73133e-05
		645.08	2.79512e-05
		645.19	2.86014e-05
		645.3	2.9264e-05
		645.41	2.99393e-05
		645.52	3.06274e-05
		645.63	3.13285e-05
		645.74	3.20427e-05
		645.85	3.27703e-05
		645.96	3.35114e-05
		646.07	3.42661e-05
		646.18	3.50346e-05
		646.29	3.58172e-05
		646.4	3.66139e-05
		646.51	3.74249e-05
		646.62	3.82505e-05
		646.73	3.90907e-05
		646.84	3.99458e-05
		646.95	4.08159e-05
		647.06	4.17012e-05
		647.17	4.26018e-05
		647.28	4.3518e-05
		647.39	4.44498e-05
		647.5	4.53975e-05
		647.61	4.63612e-05
		647.72	4.73411e-05
		647.83	4.83373e-05
		647.94	4.93658e-05
		648.05	5.03959e-05
		648.16	5.14429e-05
		648.27	5.25069e-05
		648.38	5.35881e-05
		648.49	5.46866e-05
		648.6	5.58026e-05
		648.71	5.69362e-05
		648.82	5.80877e-05
		648.93	5.92571e-05
		649.04	6.04445e-05
		649.15	6.16654e-05
		649.26	6.28901e-05
		649.37	6.41334e-05
		649.48	6.53954e-05
		649.59	6.66762e-05
		649.7	6.7976e-05
		649.81	6.92949e-05
		649.92	7.06484e-05
		650.03	7.20064e-05
		650.14	7.33839e-05
		650.25	7.4781e-05
		650.36	7.61979e-05
		650.47	7.76346e-05
		650.58	7.90914e-05
		650.69	8.05682e-05
		650.8	8.20653e-05
		650.91	8.35827e-05
		651.02	8.51205e-05
		651.13	8.6694e-05
		651.24	8.82734e-05
		651.35	8.98736e-05
		651.46	9.14945e-05
		651.57	9.31364e-05
		651.68	9.47992e-05
		651.79	9.6483e-05
		651.9	9.8188e-05
		652.01	9.99142e-05
		652.12	0.000101662
		652.23	0.00010343
		652.34	0.00010522
		652.45	0.000107032
		652.56	0.000108865
		652.67	0.000110719
		652.78	0.000112595
		652.89	0.000114493
		653	0.000116412
		653.11	0.000118352
		653.22	0.000120315
		653.33	0.000122299
		653.44	0.000124304
		653.55	0.000126331
		653.66	0.00012838
		653.77	0.000130451
		653.88	0.000132543
		653.99	0.000134656
		654.1	0.000136791
		654.21	0.000138948
		654.32	0.000141126
		654.43	0.000143325
		654.54	0.000145546
		654.65	0.000147788
		654.76	0.000150051
		654.87	0.000152335
		654.98	0.000154641
		655.09	0.000156967
		655.2	0.000159314
		655.31	0.000161682
		655.42	0.000164086
		655.53	0.000166496
		655.64	0.000168926
		655.75	0.000171377
		655.86	0.000173848
		655.97	0.000176339
		656.08	0.000178849
		656.19	0.00018138
		656.3	0.00018393
		656.41	0.0001865
		656.52	0.000189088
		656.63	0.000191696
		656.74	0.000194323
		656.85	0.000196968
		656.96	0.000199632
		657.07	0.000202314
		657.18	0.000205014
		657.29	0.000207732
		657.4	0.000210468
		657.51	0.000213221
		657.62	0.000215991
		657.73	0.000218778
		657.84	0.000221581
		657.95	0.000224417
		658.06	0.000227253
		658.17	0.000230105
		658.28	0.000232989
		658.39	0.000235872
		658.5	0.000238771
		658.61	0.000241685
		658.72	0.000244613
		658.83	0.000247555
		658.94	0.00025051
		659.05	0.000253479
		659.16	0.000256462
		659.27	0.000259456
		659.38	0.000262464
		659.49	0.000265483
		659.6	0.000268514
		659.71	0.000271572
		659.82	0.000274626
		659.93	0.00027769
		660.04	0.000280765
		660.15	0.00028385
		660.26	0.000286944
		660.37	0.000290047
		660.48	0.000293158
		660.59	0.000296278
		660.7	0.000299406
		660.81	0.000302542
		660.92	0.000305684
		661.03	0.000308833
		661.14	0.000311988
		661.25	0.000315149
		661.36	0.000318316
		661.47	0.000321487
		661.58	0.000324663
		661.69	0.000327843
		661.8	0.000331027
		661.91	0.000334214
		662.02	0.000337403
		662.13	0.000340626
		662.24	0.000343821
		662.35	0.000347018
		662.46	0.000350215
		662.57	0.000353413
		662.68	0.000356612
		662.79	0.00035981
		662.9	0.000363007
		663.01	0.000366203
		663.12	0.000369398
		663.23	0.00037259
		663.34	0.00037578
		663.45	0.000378967
		663.56	0.00038215
		663.67	0.000385329
		663.78	0.000388505
		663.89	0.00039169
		664	0.000394856
		664.11	0.000398016
		664.22	0.000401171
		664.33	0.000404318
		664.44	0.000407459
		664.55	0.000410608
		664.66	0.000413734
		664.77	0.000416853
		664.88	0.000419962
		664.99	0.000423063
		665.1	0.000426155
		665.21	0.000429236
		665.32	0.000432308
		665.43	0.000435369
		665.54	0.00043842
		665.65	0.000441459
		665.76	0.000444487
		665.87	0.000447503
		665.98	0.000450506
		666.09	0.000453497
		666.2	0.00045649
		666.31	0.000459456
		666.42	0.000462408
		666.53	0.000465361
		666.64	0.000468286
		666.75	0.000471197
		666.86	0.000474092
		666.97	0.000476973
		667.08	0.000479839
		667.19	0.00048269
		667.3	0.000485524
		667.41	0.000488344
		667.52	0.000491147
		667.63	0.000493949
		667.74	0.000496721
		667.85	0.000499475
		667.96	0.000502214
		668.07	0.000504935
		668.18	0.00050764
		668.29	0.000510328
		668.4	0.000512998
		668.51	0.000515652
		668.62	0.000518288
		668.73	0.000520907
		668.84	0.000523509
		668.95	0.000526094
		669.06	0.000528677
		669.17	0.000531228
		669.28	0.000533762
		669.39	0.000536279
		669.5	0.000538779
		669.61	0.000541262
		669.72	0.000543728
		669.83	0.000546177
		669.94	0.00054861
		670.05	0.000551026
		670.16	0.000553427
		670.27	0.000555841
		670.38	0.000558211
		670.49	0.000560565
		670.6	0.00056292
		670.71	0.00056526
		670.82	0.000567587
		670.93	0.000569885
		671.04	0.000572168
		671.15	0.000574438
		671.26	0.000576726
		671.37	0.000578972
		671.48	0.000581205
		671.59	0.000583458
		671.7	0.000585686
		671.81	0.000587887
		671.92	0.000590079
		672.03	0.000592261
		672.14	0.000594435
		672.25	0.000596599
		672.36	0.000598772
		672.47	0.000600923
		672.58	0.000603067
		672.69	0.000605206
		672.8	0.000607339
		672.91	0.000609469
		673.02	0.000611594
		673.13	0.000613717
		673.24	0.000615838
		673.35	0.000617974
		673.46	0.000620094
		673.57	0.000622215
		673.68	0.000624338
		673.79	0.000626463
		673.9	0.000628591
		674.01	0.000630724
		674.12	0.000632863
		674.23	0.000635007
		674.34	0.00063716
		674.45	0.000639321
		674.56	0.000641507
		674.67	0.000643688
		674.78	0.000645882
		674.89	0.000648104
		675	0.000650326
		675.11	0.000652563
		675.22	0.000654833
		675.33	0.000657122
		675.44	0.000659415
		675.55	0.000661729
		675.66	0.000664065
		675.77	0.000666424
		675.88	0.000668808
		675.99	0.000671219
		676.1	0.000673657
		676.21	0.000676124
		676.32	0.000678622
		676.43	0.000681152
		676.54	0.000683715
		676.65	0.000686314
		676.76	0.000688965
		676.87	0.000691639
		676.98	0.000694354
		677.09	0.00069711
		677.2	0.000699909
		677.31	0.000702753
		677.42	0.000705644
		677.53	0.000708584
		677.64	0.000711573
		677.75	0.000714615
		677.86	0.00071771
		677.97	0.00072086
		678.08	0.000724083
		678.19	0.000727351
		678.3	0.000730679
		678.41	0.00073407
		678.52	0.000737526
		678.63	0.000741065
		678.74	0.000744657
		678.85	0.00074832
		678.96	0.000752055
		679.07	0.000755881
		679.18	0.000759768
		679.29	0.000763735
		679.4	0.000767781
		679.51	0.000771911
		679.62	0.000776126
		679.73	0.000780427
		679.84	0.000784818
		679.95	0.0007893
		680.06	0.000793875
		680.17	0.000798546
		680.28	0.000803314
		680.39	0.000808183
		680.5	0.000813153
		680.61	0.000818228
		680.72	0.00082341
		680.83	0.0008287
		680.94	0.000834102
		681.05	0.000839616
		681.16	0.000845247
		681.27	0.000850995
		681.38	0.000856863
		681.49	0.000862854
		681.6	0.000868986
		681.71	0.000875229
		681.82	0.000881602
		681.93	0.000888107
		682.04	0.000894746
		682.15	0.000901522
		682.26	0.000908437
		682.37	0.000915494
		682.48	0.000922694
		682.59	0.000930041
		682.7	0.000937536
		682.81	0.000945182
		682.92	0.000952982
		683.03	0.000960938
		683.14	0.000969052
		683.25	0.000977327
		683.36	0.000985766
		683.47	0.00099437
		683.58	0.00100314
		683.69	0.00101209
		683.8	0.0010212
		683.91	0.00103049
		684.02	0.00103996
		684.13	0.00104962
		684.24	0.00105945
		684.35	0.00106947
		684.46	0.00107968
		684.57	0.00109008
		684.68	0.00110067
		684.79	0.00111146
		684.9	0.00112244
		685.01	0.00113364
		685.12	0.00114503
		685.23	0.00115663
		685.34	0.00116843
		685.45	0.00118045
		685.56	0.00119267
		685.67	0.00120512
		685.78	0.00121778
		685.89	0.00123066
		686	0.00124377
		686.11	0.0012571
		686.22	0.00127066
		686.33	0.00128445
		686.44	0.00129847
		686.55	0.00131273
		686.66	0.00132723
		686.77	0.00134196
		686.88	0.00135695
		686.99	0.00137217
		687.1	0.00138765
		687.21	0.00140337
		687.32	0.00141935
		687.43	0.00143558
		687.54	0.00145207
		687.65	0.00146882
		687.76	0.00148584
		687.87	0.00150311
		687.98	0.00152066
		688.09	0.00153849
		688.2	0.00155658
		688.31	0.00157494
		688.42	0.0015936
		688.53	0.00161252
		688.64	0.00163173
		688.75	0.00165122
		688.86	0.00167099
		688.97	0.00169108
		689.08	0.00171144
		689.19	0.00173208
		689.3	0.00175303
		689.41	0.00177427
		689.52	0.0017958
		689.63	0.00181765
		689.74	0.00183979
		689.85	0.00186226
		689.96	0.00188502
		690.07	0.00190809
		690.18	0.00193148
		690.29	0.00195518
		690.4	0.00197922
		690.51	0.00200355
		690.62	0.00202821
		690.73	0.0020532
		690.84	0.0020785
		690.95	0.00210414
		691.06	0.0021301
		691.17	0.0021564
		691.28	0.00218303
		691.39	0.00221002
		691.5	0.00223733
		691.61	0.00226498
		691.72	0.00229296
		691.83	0.00232129
		691.94	0.00234996
		692.05	0.00237897
		692.16	0.00240833
		692.27	0.00243804
		692.38	0.0024681
		692.49	0.00249852
		692.6	0.00252928
		692.71	0.00256041
		692.82	0.00259188
		692.93	0.00262372
		693.04	0.00265592
		693.15	0.00268847
		693.26	0.00272139
		693.37	0.00275467
		693.48	0.00278832
		693.59	0.00282235
		693.7	0.00285673
		693.81	0.00289147
		693.92	0.00292659
		694.03	0.00296207
		694.14	0.00299793
		694.25	0.00303415
		694.36	0.00307075
		694.47	0.00310772
		694.58	0.00314507
		694.69	0.00318279
		694.8	0.00322088
		694.91	0.00325935
		695.02	0.00329819
		695.13	0.00333741
		695.24	0.00337701
		695.35	0.00341698
		695.46	0.00345733
		695.57	0.00349805
		695.68	0.00353916
		695.79	0.00358063
		695.9	0.0036225
		696.01	0.00366473
		696.12	0.00370734
		696.23	0.00375032
		696.34	0.00379368
		696.45	0.00383741
		696.56	0.00388152
		696.67	0.003926
		696.78	0.00397085
		696.89	0.00401607
		697	0.00406168
		697.11	0.00410766
		697.22	0.00415399
		697.33	0.00420069
		697.44	0.00424776
		697.55	0.00429519
		697.66	0.00434298
		697.77	0.00439113
		697.88	0.00443965
		697.99	0.00448852
		698.1	0.00453775
		698.21	0.00458733
		698.32	0.00463728
		698.43	0.00468757
		698.54	0.0047382
		698.65	0.00478918
		698.76	0.00484051
		698.87	0.00489217
		698.98	0.00494417
		699.09	0.0049965
		699.2	0.00504917
		699.31	0.00510218
		699.42	0.00515551
		699.53	0.00520915
		699.64	0.00526312
		699.75	0.0053174
		699.86	0.005372
		699.97	0.0054269
		700.08	0.00548211
		700.19	0.00553763
		700.3	0.00559344
		700.41	0.00564954
		700.52	0.00570593
		700.63	0.00576261
		700.74	0.00581957
		700.85	0.00587681
		700.96	0.00593431
		701.07	0.00599209
		701.18	0.00605013
		701.29	0.00610843
		701.4	0.00616698
		701.51	0.00622577
		701.62	0.00628482
		701.73	0.00634409
		701.84	0.00640361
		701.95	0.00646334
		702.06	0.0065233
		702.17	0.00658348
		702.28	0.00664388
		702.39	0.00670447
		702.5	0.00676526
		702.61	0.00682624
		702.72	0.00688741
		702.83	0.00694876
		702.94	0.00701029
		703.05	0.00707198
		703.16	0.00713384
		703.27	0.00719585
		703.38	0.00725801
		703.49	0.00732031
		703.6	0.00738274
		703.71	0.00744531
		703.82	0.007508
		703.93	0.00757082
		704.04	0.00763374
		704.15	0.00769675
		704.26	0.00775986
		704.37	0.00782306
		704.48	0.00788634
		704.59	0.0079497
		704.7	0.00801312
		704.81	0.0080766
		704.92	0.00814013
		705.03	0.00820371
		705.14	0.00826732
		705.25	0.00833097
		705.36	0.00839464
		705.47	0.00845832
		705.58	0.00852202
		705.69	0.00858571
		705.8	0.0086494
		705.91	0.00871308
		706.02	0.00877673
		706.13	0.00884035
		706.24	0.00890394
		706.35	0.00896749
		706.46	0.00903098
		706.57	0.00909442
		706.68	0.00915779
		706.79	0.00922109
		706.9	0.00928431
		707.01	0.00934744
		707.12	0.00941048
		707.23	0.00947341
		707.34	0.00953624
		707.45	0.00959895
		707.56	0.00966153
		707.67	0.00972399
		707.78	0.0097863
		707.89	0.00984848
		708	0.0099105
		708.11	0.00997236
		708.22	0.0100341
		708.33	0.0100956
		708.44	0.0101569
		708.55	0.0102181
		708.66	0.0102791
		708.77	0.0103398
		708.88	0.0104004
		708.99	0.0104607
		709.1	0.0105209
		709.21	0.0105808
		709.32	0.0106405
		709.43	0.0106999
		709.54	0.0107591
		709.65	0.0108181
		709.76	0.0108768
		709.87	0.0109352
		709.98	0.0109934
		710.09	0.0110513
		710.2	0.0111089
		710.31	0.0111663
		710.42	0.0112233
		710.53	0.0112801
		710.64	0.0113366
		710.75	0.0113927
		710.86	0.0114486
		710.97	0.0115041
		711.08	0.0115594
		711.19	0.0116143
		711.3	0.0116689
		711.41	0.0117231
		711.52	0.011777
		711.63	0.0118306
		711.74	0.0118839
		711.85	0.0119368
		711.96	0.0119893
		712.07	0.0120415
		712.18	0.0120934
		712.29	0.0121449
		712.4	0.012196
		712.51	0.0122467
		712.62	0.0122971
		712.73	0.0123471
		712.84	0.0123968
		712.95	0.012446
		713.06	0.0124949
		713.17	0.0125434
		713.28	0.0125915
		713.39	0.0126392
		713.5	0.0126866
		713.61	0.0127335
		713.72	0.0127801
		713.83	0.0128262
		713.94	0.012872
		714.05	0.0129173
		714.16	0.0129623
		714.27	0.0130068
		714.38	0.013051
		714.49	0.0130947
		714.6	0.0131381
		714.71	0.013181
		714.82	0.0132235
		714.93	0.0132657
		715.04	0.0133074
		715.15	0.0133487
		715.26	0.0133896
		715.37	0.01343
		715.48	0.0134701
		715.59	0.0135098
		715.7	0.013549
		715.81	0.0135878
		715.92	0.0136262
		716.03	0.0136642
		716.14	0.0137018
		716.25	0.013739
		716.36	0.0137757
		716.47	0.0138121
		716.58	0.013848
		716.69	0.0138835
		716.8	0.0139186
		716.91	0.0139533
		717.02	0.0139876
		717.13	0.0140215
		717.24	0.014055
		717.35	0.014088
		717.46	0.0141206
		717.57	0.0141529
		717.68	0.0141847
		717.79	0.0142161
		717.9	0.0142471
		718.01	0.0142777
		718.12	0.0143079
		718.23	0.0143377
		718.34	0.0143671
		718.45	0.0143961
		718.56	0.0144247
		718.67	0.0144529
		718.78	0.0144807
		718.89	0.0145081
		719	0.0145351
		719.11	0.0145617
		719.22	0.0145879
		719.33	0.0146137
		719.44	0.0146391
		719.55	0.0146642
		719.66	0.0146888
		719.77	0.014713
		719.88	0.0147369
		719.99	0.0147604
		720.1	0.0147835
		720.21	0.0148062
		720.32	0.0148285
		720.43	0.0148504
		720.54	0.014872
		720.65	0.0148932
		720.76	0.014914
		720.87	0.0149344
		720.98	0.0149544
		721.09	0.0149741
		721.2	0.0149934
		721.31	0.0150123
		721.42	0.0150309
		721.53	0.015049
		721.64	0.0150668
		721.75	0.0150843
		721.86	0.0151013
		721.97	0.015118
		722.08	0.0151344
		722.19	0.0151503
		722.3	0.0151659
		722.41	0.0151812
		722.52	0.0151961
		722.63	0.0152106
		722.74	0.0152247
		722.85	0.0152385
		722.96	0.015252
		723.07	0.0152651
		723.18	0.0152778
		723.29	0.0152902
		723.4	0.0153022
		723.51	0.0153138
		723.62	0.0153251
		723.73	0.0153361
		723.84	0.0153467
		723.95	0.015357
		724.06	0.0153669
		724.17	0.0153764
		724.28	0.0153856
		724.39	0.0153945
		724.5	0.015403
		724.61	0.0154112
		724.72	0.015419
		724.83	0.0154265
		724.94	0.0154336
		725.05	0.0154404
		725.16	0.0154469
		725.27	0.015453
		725.38	0.0154587
		725.49	0.0154642
		725.6	0.0154692
		725.71	0.015474
		725.82	0.0154784
		725.93	0.0154825
		726.04	0.0154862
		726.15	0.0154896
		726.26	0.0154927
		726.37	0.0154954
		726.48	0.0154978
		726.59	0.0154999
		726.7	0.0155016
		726.81	0.015503
		726.92	0.0155041
		727.03	0.0155048
		727.14	0.0155052
		727.25	0.0155053
		727.36	0.0155051
		727.47	0.0155045
		727.58	0.0155036
		727.69	0.0155024
		727.8	0.0155008
		727.91	0.015499
		728.02	0.0154968
		728.13	0.0154943
		728.24	0.0154914
		728.35	0.0154883
		728.46	0.0154848
		728.57	0.015481
		728.68	0.0154769
		728.79	0.0154724
		728.9	0.0154677
		729.01	0.0154626
		729.12	0.0154573
		729.23	0.0154516
		729.34	0.0154456
		729.45	0.0154393
		729.56	0.0154327
		729.67	0.0154257
		729.78	0.0154185
		729.89	0.015411
		730	0.0154031
		730.11	0.015395
		730.22	0.0153866
		730.33	0.0153778
		730.44	0.0153688
		730.55	0.0153594
		730.66	0.0153498
		730.77	0.0153399
		730.88	0.0153296
		730.99	0.0153191
		731.1	0.0153083
		731.21	0.0152972
		731.32	0.0152858
		731.43	0.0152742
		731.54	0.0152622
		731.65	0.01525
		731.76	0.0152375
		731.87	0.0152247
		731.98	0.0152116
		732.09	0.0151982
		732.2	0.0151846
		732.31	0.0151707
		732.42	0.0151566
		732.53	0.0151422
		732.64	0.0151275
		732.75	0.0151125
		732.86	0.0150973
		732.97	0.0150818
		733.08	0.0150661
		733.19	0.0150501
		733.3	0.0150338
		733.41	0.0150173
		733.52	0.0150006
		733.63	0.0149836
		733.74	0.0149664
		733.85	0.0149489
		733.96	0.0149312
		734.07	0.0149132
		734.18	0.0148951
		734.29	0.0148766
		734.4	0.014858
		734.51	0.0148391
		734.62	0.01482
		734.73	0.0148007
		734.84	0.0147811
		734.95	0.0147614
		735.06	0.0147414
		735.17	0.0147212
		735.28	0.0147008
		735.39	0.0146802
		735.5	0.0146594
		735.61	0.0146384
		735.72	0.0146172
		735.83	0.0145958
		735.94	0.0145742
		736.05	0.0145524
		736.16	0.0145305
		736.27	0.0145083
		736.38	0.014486
		736.49	0.0144635
		736.6	0.0144408
		736.71	0.0144179
		736.82	0.0143949
		736.93	0.0143717
		737.04	0.0143484
		737.15	0.0143249
		737.26	0.0143012
		737.37	0.0142774
		737.48	0.0142534
		737.59	0.0142293
		737.7	0.014205
		737.81	0.0141806
		737.92	0.0141561
		738.03	0.0141314
		738.14	0.0141066
		738.25	0.0140816
		738.36	0.0140566
		738.47	0.0140314
		738.58	0.0140061
		738.69	0.0139807
		738.8	0.0139551
		738.91	0.0139295
		739.02	0.0139037
		739.13	0.0138779
		739.24	0.013852
		739.35	0.0138259
		739.46	0.0137998
		739.57	0.0137736
		739.68	0.0137473
		739.79	0.0137209
		739.9	0.0136944
		740.01	0.0136679
		740.12	0.0136412
		740.23	0.0136146
		740.34	0.0135878
		740.45	0.013561
		740.56	0.0135341
		740.67	0.0135072
		740.78	0.0134802
		740.89	0.0134532
		741	0.0134261
		741.11	0.013399
		741.22	0.0133719
		741.33	0.0133447
		741.44	0.0133175
		741.55	0.0132902
		741.66	0.013263
		741.77	0.0132357
		741.88	0.0132084
		741.99	0.013181
		742.1	0.0131537
		742.21	0.0131263
		742.32	0.013099
		742.43	0.0130716
		742.54	0.0130443
		742.65	0.0130169
		742.76	0.0129896
		742.87	0.0129622
		742.98	0.0129349
		743.09	0.0129076
		743.2	0.0128803
		743.31	0.0128531
		743.42	0.0128258
		743.53	0.0127986
		743.64	0.0127714
		743.75	0.0127443
		743.86	0.0127172
		743.97	0.0126901
		744.08	0.0126631
		744.19	0.0126361
		744.3	0.0126091
		744.41	0.0125823
		744.52	0.0125554
		744.63	0.0125287
		744.74	0.0125019
		744.85	0.0124753
		744.96	0.0124487
		745.07	0.0124222
		745.18	0.0123957
		745.29	0.0123693
		745.4	0.012343
		745.51	0.0123168
		745.62	0.0122906
		745.73	0.0122646
		745.84	0.0122386
		745.95	0.0122127
		746.06	0.0121869
		746.17	0.0121612
		746.28	0.0121355
		746.39	0.01211
		746.5	0.0120845
		746.61	0.0120592
		746.72	0.0120339
		746.83	0.0120088
		746.94	0.0119837
		747.05	0.0119588
		747.16	0.0119339
		747.27	0.0119092
		747.38	0.0118846
		747.49	0.01186
		747.6	0.0118356
		747.71	0.0118113
		747.82	0.0117871
		747.93	0.0117631
		748.04	0.0117391
		748.15	0.0117153
		748.26	0.0116915
		748.37	0.0116679
		748.48	0.0116444
		748.59	0.0116211
		748.7	0.0115978
		748.81	0.0115747
		748.92	0.0115517
		749.03	0.0115288
		749.14	0.011506
		749.25	0.0114833
		749.36	0.0114608
		749.47	0.0114384
		749.58	0.0114161
		749.69	0.0113939
		749.8	0.0113718
		749.91	0.0113499
		750.02	0.0113281
		750.13	0.0113064
		750.24	0.0112848
		750.35	0.0112633
		750.46	0.011242
		750.57	0.0112208
		750.68	0.0111996
		750.79	0.0111786
		750.9	0.0111578
		751.01	0.011137
		751.12	0.0111163
		751.23	0.0110958
		751.34	0.0110753
		751.45	0.011055
		751.56	0.0110347
		751.67	0.0110146
		751.78	0.0109946
		751.89	0.0109746
		752	0.0109548
		752.11	0.0109351
		752.22	0.0109154
		752.33	0.0108959
		752.44	0.0108764
		752.55	0.010857
		752.66	0.0108378
		752.77	0.0108186
		752.88	0.0107994
		752.99	0.0107804
		753.1	0.0107614
		753.21	0.0107425
		753.32	0.0107237
		753.43	0.010705
		753.54	0.0106863
		753.65	0.0106677
		753.76	0.0106491
		753.87	0.0106306
		753.98	0.0106122
		754.09	0.0105938
		754.2	0.0105754
		754.31	0.0105571
		754.42	0.0105389
		754.53	0.0105207
		754.64	0.0105025
		754.75	0.0104843
		754.86	0.0104662
		754.97	0.0104481
		755.08	0.0104301
		755.19	0.010412
		755.3	0.010394
		755.41	0.010376
		755.52	0.010358
		755.63	0.01034
		755.74	0.010322
		755.85	0.010304
		755.96	0.010286
		756.07	0.010268
		756.18	0.01025
		756.29	0.0102319
		756.4	0.0102139
		756.51	0.0101958
		756.62	0.0101777
		756.73	0.0101596
		756.84	0.0101415
		756.95	0.0101233
		757.06	0.010105
		757.17	0.0100868
		757.28	0.0100684
		757.39	0.0100501
		757.5	0.0100316
		757.61	0.0100132
		757.72	0.00999463
		757.83	0.00997603
		757.94	0.00995736
		758.05	0.00993862
		758.16	0.0099198
		758.27	0.00990091
		758.38	0.00988194
		758.49	0.00986289
		758.6	0.00984375
		758.71	0.00982452
		758.82	0.00980519
		758.93	0.00978578
		759.04	0.00976626
		759.15	0.00974664
		759.26	0.00972692
		759.37	0.00970708
		759.48	0.00968714
		759.59	0.00966709
		759.7	0.00964692
		759.81	0.00962663
		759.92	0.00960622
		760.03	0.00958568
		760.14	0.00956502
		760.25	0.00954423
		760.36	0.00952331
		760.47	0.00950226
		760.58	0.00948107
		760.69	0.00945975
		760.8	0.00943827
		760.91	0.00941666
		761.02	0.00939493
		761.13	0.00937303
		761.24	0.00935099
		761.35	0.0093288
		761.46	0.00930645
		761.57	0.00928395
		761.68	0.00926131
		761.79	0.00923851
		761.9	0.00921556
		762.01	0.00919244
		762.12	0.00916917
		762.23	0.00914574
		762.34	0.00912215
		762.45	0.0090984
		762.56	0.00907448
		762.67	0.0090504
		762.78	0.00902616
		762.89	0.00900176
		763	0.00897718
		763.11	0.00895243
		763.22	0.00892753
		763.33	0.00890247
		763.44	0.00887723
		763.55	0.00885183
		763.66	0.00882627
		763.77	0.00880054
		763.88	0.00877464
		763.99	0.00874858
		764.1	0.00872235
		764.21	0.00869596
		764.32	0.0086694
		764.43	0.00864268
		764.54	0.0086158
		764.65	0.00858875
		764.76	0.00856154
		764.87	0.00853417
		764.98	0.00850664
		765.09	0.00847895
		765.2	0.0084511
		765.31	0.0084231
		765.42	0.00839494
		765.53	0.00836662
		765.64	0.00833816
		765.75	0.00830954
		765.86	0.00828077
		765.97	0.00825185
		766.08	0.00822279
		766.19	0.00819357
		766.3	0.00816422
		766.41	0.00813472
		766.52	0.00810509
		766.63	0.00807531
		766.74	0.0080454
		766.85	0.00801536
		766.96	0.00798518
		767.07	0.00795488
		767.18	0.00792444
		767.29	0.00789388
		767.4	0.0078632
		767.51	0.00783238
		767.62	0.00780146
		767.73	0.00777042
		767.84	0.00773927
		767.95	0.007708
		768.06	0.00767663
		768.17	0.00764515
		768.28	0.00761356
		768.39	0.00758187
		768.5	0.00755009
		768.61	0.00751821
		768.72	0.00748624
		768.83	0.00745418
		768.94	0.00742203
		769.05	0.0073898
		769.16	0.00735748
		769.27	0.00732509
		769.38	0.00729262
		769.49	0.00726007
		769.6	0.00722746
		769.71	0.00719477
		769.82	0.00716203
		769.93	0.00712922
		770.04	0.00709635
		770.15	0.00706342
		770.26	0.00703044
		770.37	0.00699742
		770.48	0.00696434
		770.59	0.00693122
		770.7	0.00689806
		770.81	0.00686484
		770.92	0.00683161
		771.03	0.00679834
		771.14	0.00676504
		771.25	0.00673171
		771.36	0.00669837
		771.47	0.00666498
		771.58	0.00663159
		771.69	0.00659819
		771.8	0.00656476
		771.91	0.00653134
		772.02	0.00649791
		772.13	0.00646447
		772.24	0.00643104
		772.35	0.0063976
		772.46	0.00636417
		772.57	0.00633075
		772.68	0.00629734
		772.79	0.00626393
		772.9	0.00623055
		773.01	0.00619718
		773.12	0.00616383
		773.23	0.00613051
		773.34	0.00609721
		773.45	0.00606393
		773.56	0.00603069
		773.67	0.00599748
		773.78	0.00596431
		773.89	0.00593117
		774	0.00589808
		774.11	0.00586502
		774.22	0.00583201
		774.33	0.00579905
		774.44	0.00576614
		774.55	0.00573328
		774.66	0.00570047
		774.77	0.00566771
		774.88	0.00563502
		774.99	0.00560238
		775.1	0.00556981
		775.21	0.0055373
		775.32	0.00550485
		775.43	0.00547247
		775.54	0.00544015
		775.65	0.00540791
		775.76	0.00537573
		775.87	0.00534364
		775.98	0.00531162
		776.09	0.00527968
		776.2	0.00524783
		776.31	0.00521605
		776.42	0.00518435
		776.53	0.00515274
		776.64	0.00512122
		776.75	0.00508978
		776.86	0.00505841
		776.97	0.00502713
		777.08	0.00499596
		777.19	0.00496487
		777.3	0.00493388
		777.41	0.00490299
		777.52	0.00487219
		777.63	0.00484149
		777.74	0.00481089
		777.85	0.00478038
		777.96	0.00474997
		778.07	0.00471967
		778.18	0.00468946
		778.29	0.00465936
		778.4	0.00462936
		778.51	0.00459947
		778.62	0.00456966
		778.73	0.00453996
		778.84	0.00451038
		778.95	0.00448091
		779.06	0.00445155
		779.17	0.00442229
		779.28	0.00439314
		779.39	0.0043641
		779.5	0.00433516
		779.61	0.00430634
		779.72	0.00427764
		779.83	0.00424904
		779.94	0.00422056
		780.05	0.00419219
		780.16	0.00416393
		780.27	0.00413579
		780.38	0.00410776
		780.49	0.00407984
		780.6	0.00405204
		780.71	0.00402435
		780.82	0.00399678
		780.93	0.00396932
		781.04	0.00394198
		781.15	0.00391476
		781.26	0.00388765
		781.37	0.00386066
		781.48	0.00383379
		781.59	0.00380703
		781.7	0.0037804
		781.81	0.00375388
		781.92	0.00372748
		782.03	0.00370119
		782.14	0.00367503
		782.25	0.00364899
		782.36	0.00362306
		782.47	0.00359726
		782.58	0.00357157
		782.69	0.00354599
		782.8	0.00352054
		782.91	0.00349522
		783.02	0.00347
		783.13	0.00344492
		783.24	0.00341995
		783.35	0.00339511
		783.46	0.00337038
		783.57	0.00334579
		783.68	0.00332132
		783.79	0.00329696
		783.9	0.00327273
		784.01	0.00324863
		784.12	0.00322466
		784.23	0.00320081
		784.34	0.00317708
		784.45	0.00315346
		784.56	0.00312998
		784.67	0.00310663
		784.78	0.0030834
		784.89	0.0030603
		785	0.00303733
		785.11	0.00301448
		785.22	0.00299176
		785.33	0.00296917
		785.44	0.00294671
		785.55	0.00292437
		785.66	0.00290216
		785.77	0.00288009
		785.88	0.00285814
		785.99	0.00283632
		786.1	0.00281463
		786.21	0.00279308
		786.32	0.00277165
		786.43	0.00275036
		786.54	0.0027292
		786.65	0.00270817
		786.76	0.00268728
		786.87	0.00266652
		786.98	0.00264588
		787.09	0.00262538
		787.2	0.00260503
		787.31	0.00258481
		787.42	0.00256472
		787.53	0.00254478
		787.64	0.00252497
		787.75	0.00250529
		787.86	0.00248576
		787.97	0.00246636
		788.08	0.0024471
		788.19	0.00242798
		788.3	0.002409
		788.41	0.00239016
		788.52	0.00237146
		788.63	0.00235291
		788.74	0.00233449
		788.85	0.00231621
		788.96	0.00229808
		789.07	0.00228009
		789.18	0.00226224
		789.29	0.00224454
		789.4	0.00222696
		789.51	0.00220954
		789.62	0.00219227
		789.73	0.00217514
		789.84	0.00215815
		789.95	0.00214131
		790.06	0.0021246
		790.17	0.00210805
		790.28	0.00209164
		790.39	0.00207538
		790.5	0.00205924
		790.61	0.00204327
		790.72	0.00202743
		790.83	0.00201175
		790.94	0.00199621
		791.05	0.00198082
		791.16	0.00196558
		791.27	0.00195047
		791.38	0.00193552
		791.49	0.0019207
		791.6	0.00190603
		791.71	0.00189151
		791.82	0.00187713
		791.93	0.00186289
		792.04	0.00184879
		792.15	0.00183484
		792.26	0.00182103
		792.37	0.00180735
		792.48	0.00179382
		792.59	0.00178043
		792.7	0.00176718
		792.81	0.00175407
		792.92	0.0017411
		793.03	0.00172826
		793.14	0.00171556
		793.25	0.001703
		793.36	0.00169057
		793.47	0.00167828
		793.58	0.00166611
		793.69	0.00165409
		793.8	0.00164219
		793.91	0.00163042
		794.02	0.00161878
		794.13	0.00160727
		794.24	0.00159587
		794.35	0.00158462
		794.46	0.00157348
		794.57	0.00156247
		794.68	0.00155158
		794.79	0.00154082
		794.9	0.00153017
		795.01	0.00151964
		795.12	0.00150922
		795.23	0.00149892
		795.34	0.00148873
		795.45	0.00147866
		795.56	0.00146869
		795.67	0.00145883
		795.78	0.00144907
		795.89	0.00143942
		796	0.00142988
		796.11	0.00142043
		796.22	0.00141109
		796.33	0.00140185
		796.44	0.0013927
		796.55	0.00138365
		796.66	0.0013747
		796.77	0.00136583
		796.88	0.00135705
		796.99	0.00134836
		797.1	0.00133974
		797.21	0.00133122
		797.32	0.00132278
		797.43	0.00131442
		797.54	0.00130613
		797.65	0.00129792
		797.76	0.00128979
		797.87	0.00128173
		797.98	0.00127374
		798.09	0.00126581
		798.2	0.00125796
		798.31	0.00125016
		798.42	0.00124243
		798.53	0.00123476
		798.64	0.00122713
		798.75	0.00121957
		798.86	0.00121207
		798.97	0.00120462
		799.08	0.00119721
		799.19	0.00118985
		799.3	0.00118252
		799.41	0.00117526
		799.52	0.00116804
		799.63	0.00116087
		799.74	0.00115373
		799.85	0.00114663
		799.96	0.00113956
		800.07	0.00113253
		800.18	0.00112552
		800.29	0.00111855
		800.4	0.00111161
		800.51	0.00110469
		800.62	0.00109778
		800.73	0.00109092
		800.84	0.00108407
		800.95	0.00107724
		801.06	0.00107044
		801.17	0.00106365
		801.28	0.00105687
		801.39	0.00105011
		801.5	0.00104336
		801.61	0.00103663
		801.72	0.0010299
		801.83	0.00102319
		801.94	0.00101648
		802.05	0.00100978
		802.16	0.00100308
		802.27	0.000996391
		802.38	0.000989703
		802.49	0.000983017
		802.6	0.000976332
		802.71	0.000969648
		802.82	0.000962963
		802.93	0.000956277
		803.04	0.000949589
		803.15	0.000942899
		803.26	0.000936204
		803.37	0.000929505
		803.48	0.000922802
		803.59	0.000916093
		803.7	0.000909378
		803.81	0.000902657
		803.92	0.000895928
		804.03	0.000889193
		804.14	0.00088245
		804.25	0.000875698
		804.36	0.000868939
		804.47	0.000862171
		804.58	0.00085538
		804.69	0.000848595
		804.8	0.000841802
		804.91	0.000835
		805.02	0.000828188
		805.13	0.000821368
		805.24	0.00081454
		805.35	0.000807702
		805.46	0.000800856
		805.57	0.000794002
		805.68	0.00078714
		805.79	0.00078027
		805.9	0.000773393
		806.01	0.000766508
		806.12	0.000759617
		806.23	0.00075272
		806.34	0.000745816
		806.45	0.000738908
		806.56	0.000731994
		806.67	0.000725076
		806.78	0.000718155
		806.89	0.00071123
		807	0.000704303
		807.11	0.000697375
		807.22	0.000690445
		807.33	0.000683514
		807.44	0.00067657
		807.55	0.000669642
		807.66	0.000662715
		807.77	0.000655792
		807.88	0.000648872
		807.99	0.000641956
		808.1	0.000635045
		808.21	0.000628141
		808.32	0.000621244
		808.43	0.000614354
		808.54	0.000607459
		808.65	0.000600589
		808.76	0.00059373
		808.87	0.000586882
		808.98	0.000580047
		809.09	0.000573226
		809.2	0.000566419
		809.31	0.000559628
		809.42	0.000552853
		809.53	0.000546096
		809.64	0.000539358
		809.75	0.00053264
		809.86	0.000525942
		809.97	0.000519266
		810.08	0.000512612
		810.19	0.000505982
		810.3	0.000499377
		810.41	0.000492797
		810.52	0.000486244
		810.63	0.000479719
		810.74	0.000473222
		810.85	0.000466755
		810.96	0.000460319
		811.07	0.000453913
		811.18	0.000447541
		811.29	0.000441201
		811.4	0.000434896
		811.51	0.000428627
		811.62	0.000422393
		811.73	0.000416196
		811.84	0.000410037
		811.95	0.000403902
		812.06	0.000397822
		812.17	0.000391782
		812.28	0.000385783
		812.39	0.000379826
		812.5	0.000373897
		812.61	0.000368026
		812.72	0.0003622
		812.83	0.000356419
		812.94	0.000350683
		813.05	0.000344993
		813.16	0.00033935
		813.27	0.000333755
		813.38	0.000328207
		813.49	0.000322708
		813.6	0.000317259
		813.71	0.000311859
		813.82	0.00030651
		813.93	0.000301211
		814.04	0.000295963
		814.15	0.000290767
		814.26	0.000285624
		814.37	0.000280533
		814.48	0.00027548
		814.59	0.000270495
		814.7	0.000265564
		814.81	0.000260687
		814.92	0.00025585
		815.03	0.000251082
		815.14	0.000246369
		815.25	0.000241711
		815.36	0.000237107
		815.47	0.000232545
		815.58	0.000228053
		815.69	0.000223617
		815.8	0.000219237
		815.91	0.000214912
		816.02	0.000210643
		816.13	0.00020643
		816.24	0.000202273
		816.35	0.000198172
		816.46	0.000194126
		816.57	0.000190137
		816.68	0.000186203
		816.79	0.000182325
		816.9	0.000178503
		817.01	0.000174736
		817.12	0.000171024
		817.23	0.000167368
		817.34	0.000163767
		817.45	0.00016022
		817.56	0.000156728
		817.67	0.000153291
		817.78	0.000149908
		817.89	0.000146579
		818	0.000143303
		818.11	0.000140081
		818.22	0.000136911
		818.33	0.000133795
		818.44	0.000130731
		818.55	0.000127719
		818.66	0.000124759
		818.77	0.000121835
		818.88	0.000118977
		818.99	0.000116171
		819.1	0.000113414
		819.21	0.000110707
		819.32	0.00010805
		819.43	0.000105441
		819.54	0.00010288
		819.65	0.000100368
		819.76	9.79032e-05
		819.87	9.54853e-05
		819.98	9.3114e-05
		820.09	9.07886e-05
		820.2	8.85089e-05
		820.31	8.62742e-05
		820.42	8.40841e-05
		820.53	8.19231e-05
		820.64	7.98059e-05
		820.75	7.77473e-05
		820.86	7.57311e-05
		820.97	7.37569e-05
		821.08	7.18239e-05
		821.19	6.99318e-05
		821.3	6.808e-05
		821.41	6.62532e-05
		821.52	6.44808e-05
		821.63	6.27471e-05
		821.74	6.10515e-05
		821.85	5.93933e-05
		821.96	5.77721e-05
		822.07	5.61873e-05
		822.18	5.46384e-05
		822.29	5.31248e-05
		822.4	5.16459e-05
		822.51	5.02013e-05
		822.62	4.87902e-05
		822.73	4.74123e-05
		822.84	4.60669e-05
		822.95	4.47536e-05
		823.06	4.34716e-05
		823.17	4.22055e-05
		823.28	4.09854e-05
		823.39	3.97951e-05
		823.5	3.86341e-05
		823.61	3.75019e-05
		823.72	3.63979e-05
		823.83	3.53215e-05
		823.94	3.42724e-05
		824.05	3.3235e-05
		824.16	3.22391e-05
		824.27	3.12689e-05
		824.38	3.03237e-05
		824.49	2.94032e-05
		824.6	2.85068e-05
		824.71	2.76341e-05
		824.82	2.67845e-05
		824.93	2.59575e-05
		825.04	2.51528e-05
		825.15	2.43698e-05
		825.26	2.35934e-05
		825.37	2.28533e-05
		825.48	2.21335e-05
		825.59	2.14188e-05
		825.7	2.07389e-05
		825.81	2.0078e-05
		825.92	1.94356e-05
		826.03	1.88113e-05
		826.14	1.82048e-05
		826.25	1.76155e-05
		826.36	1.70432e-05
		826.47	1.64873e-05
		826.58	1.59476e-05
		826.69	1.54236e-05
		826.8	1.49149e-05
		826.91	1.44212e-05
		827.02	1.39421e-05
		827.13	1.34773e-05
		827.24	1.30263e-05
		827.35	1.25889e-05
		827.46	1.21647e-05
		827.57	1.17534e-05
		827.68	1.13546e-05
		827.79	1.09681e-05
		827.9	1.05934e-05
		828.01	1.02303e-05
		828.12	9.87853e-06
		828.23	9.53772e-06
		828.34	9.2076e-06
		828.45	8.88789e-06
		828.56	8.57829e-06
		828.67	8.27854e-06
		828.78	7.98836e-06
		828.89	7.70749e-06
		829	7.43567e-06
		829.11	7.17265e-06
		829.22	6.91818e-06
		829.33	6.67201e-06
		829.44	6.43392e-06
		829.55	6.20366e-06
		829.66	5.98101e-06
		829.77	5.76576e-06
		829.88	5.55767e-06
		829.99	5.34166e-06
		830.1	5.14786e-06
		830.21	4.9606e-06
		830.32	4.77968e-06
		830.43	4.60491e-06
		830.54	4.4361e-06
		830.65	4.2583e-06
		830.76	4.10134e-06
		830.87	3.9498e-06
		830.98	3.8035e-06
		831.09	3.6623e-06
		831.2	3.52602e-06
		831.31	3.39452e-06
		831.42	3.26764e-06
		831.53	3.14524e-06
		831.64	3.02717e-06
		831.75	2.91329e-06
		831.86	2.80348e-06
		831.97	2.69759e-06
		832.08	2.5955e-06
		832.19	2.49709e-06
		832.3	2.40223e-06
		832.41	2.31081e-06
		832.52	2.22271e-06
		832.63	2.13782e-06
		832.74	2.05604e-06
		832.85	1.97726e-06
		832.96	1.90137e-06
		833.07	1.82829e-06
		833.18	1.75791e-06
		833.29	1.69014e-06
		833.4	1.62489e-06
		833.51	1.56208e-06
		833.62	1.50162e-06
		833.73	1.44343e-06
		833.84	1.38742e-06
		833.95	1.33353e-06
		834.06	1.28167e-06
		834.17	1.23178e-06
		834.28	1.18379e-06
		834.39	1.13762e-06
		834.5	1.09322e-06
		834.61	1.05051e-06
		834.72	1.00945e-06
		834.83	9.69957e-07
		834.94	9.31988e-07
		835.05	8.95484e-07
		835.16	8.60392e-07
		835.27	8.26659e-07
		835.38	7.94236e-07
		835.49	7.63074e-07
		835.6	7.33126e-07
		835.71	7.04347e-07
		835.82	6.76694e-07
		835.93	6.50123e-07
		836.04	6.24595e-07
		836.15	6.00069e-07
		836.26	5.76509e-07
		836.37	5.53877e-07
		836.48	5.32138e-07
		836.59	5.11258e-07
		836.7	4.91203e-07
		836.81	4.71944e-07
		836.92	4.38488e-07
		837.03	4.21246e-07
		837.14	4.04692e-07
		837.25	3.88801e-07
		837.36	3.73545e-07
		837.47	3.58899e-07
		837.58	3.44841e-07
		837.69	3.31347e-07
		837.8	3.18393e-07
		837.91	3.0596e-07
		838.02	2.94026e-07
		838.13	2.82572e-07
		838.24	2.71578e-07
		838.35	2.61026e-07
		838.46	2.50899e-07
		838.57	2.41179e-07
		838.68	2.3185e-07
		838.79	2.22896e-07
		838.9	2.14302e-07
		839.01	2.06054e-07
		839.12	1.98138e-07
		839.23	1.90539e-07
		839.34	1.83247e-07
		839.45	1.76246e-07
		839.56	1.54725e-07
		839.67	1.48665e-07
		839.78	1.42854e-07
		839.89	1.37281e-07
[truncated: 1 more rows]

## Sheet: PlotDat2
Source sheet	data	660	9.2048e-08
Plot name	ProbDens2	660.09	9.43258e-08
Plot Type	16	660.18	9.66564e-08
1st free col	5	660.27	1.12689e-07
Sigma Level	2	660.36	1.15536e-07
Absolute Errs	TRUE	660.45	1.18451e-07
Symbol Type	5	660.54	1.21436e-07
Inverse Plot	FALSE	660.63	1.24491e-07
Color Plot	FALSE	660.72	1.27619e-07
3D plot	FALSE	660.81	1.30821e-07
Linear	FALSE	660.9	1.47996e-07
Data Range	AD81:AE154	660.99	1.51912e-07
Filled Symbols	TRUE	661.08	1.55929e-07
ConcAge	FALSE	661.17	1.60049e-07
ConcSwap	FALSE	661.26	1.64275e-07
1st Symbol-row	1	661.35	1.6861e-07
		661.44	1.73055e-07
		661.53	1.77614e-07
		661.62	1.82291e-07
		661.71	1.87086e-07
		661.8	1.92005e-07
		661.89	1.97049e-07
		661.98	2.02221e-07
		662.07	2.07526e-07
		662.16	2.12966e-07
		662.25	2.18545e-07
		662.34	2.24266e-07
		662.43	2.30132e-07
		662.52	2.36148e-07
		662.61	2.42316e-07
		662.7	2.48641e-07
		662.79	2.55127e-07
		662.88	2.61777e-07
		662.97	2.68596e-07
		663.06	2.75587e-07
		663.15	2.82755e-07
		663.24	2.90105e-07
		663.33	2.97641e-07
		663.42	3.05366e-07
		663.51	3.13287e-07
		663.6	3.21408e-07
		663.69	3.43728e-07
		663.78	3.5281e-07
		663.87	3.76061e-07
		663.96	3.86069e-07
		664.05	3.96339e-07
		664.14	4.06875e-07
		664.23	4.17687e-07
		664.32	4.2878e-07
		664.41	4.40161e-07
		664.5	4.51839e-07
		664.59	4.6382e-07
		664.68	4.76112e-07
		664.77	4.88724e-07
		664.86	5.01662e-07
		664.95	5.14936e-07
		665.04	5.28555e-07
		665.13	5.42526e-07
		665.22	5.56858e-07
		665.31	5.71561e-07
		665.4	5.86645e-07
		665.49	6.02118e-07
		665.58	6.1799e-07
		665.67	6.34272e-07
		665.76	6.50974e-07
		665.85	6.68106e-07
		665.94	6.85679e-07
		666.03	7.03705e-07
		666.12	7.22194e-07
		666.21	7.41158e-07
		666.3	7.60608e-07
		666.39	7.80558e-07
		666.48	8.01019e-07
		666.57	8.22005e-07
		666.66	8.43527e-07
		666.75	8.656e-07
		666.84	8.88238e-07
		666.93	9.11453e-07
		667.02	9.35261e-07
		667.11	9.59676e-07
		667.2	9.84713e-07
		667.29	1.01039e-06
		667.38	1.03671e-06
		667.47	1.06371e-06
		667.56	1.09139e-06
		667.65	1.11978e-06
		667.74	1.14888e-06
		667.83	1.17872e-06
		667.92	1.20932e-06
		668.01	1.24069e-06
		668.1	1.27285e-06
		668.19	1.30582e-06
		668.28	1.33963e-06
		668.37	1.37428e-06
		668.46	1.40981e-06
		668.55	1.44623e-06
		668.64	1.48357e-06
		668.73	1.52184e-06
		668.82	1.56107e-06
		668.91	1.60129e-06
		669	1.64251e-06
		669.09	1.68476e-06
		669.18	1.72806e-06
		669.27	1.77244e-06
		669.36	1.81793e-06
		669.45	1.86455e-06
		669.54	1.91233e-06
		669.63	1.9613e-06
		669.72	2.01148e-06
		669.81	2.0629e-06
		669.9	2.1292e-06
		669.99	2.18356e-06
		670.08	2.23927e-06
		670.17	2.29635e-06
		670.26	2.36851e-06
		670.35	2.42884e-06
		670.44	2.49065e-06
		670.53	2.55398e-06
		670.62	2.61887e-06
		670.71	2.68534e-06
		670.8	2.75344e-06
		670.89	2.8232e-06
		670.98	2.90833e-06
		671.07	2.98202e-06
		671.16	3.0575e-06
		671.25	3.13482e-06
		671.34	3.21402e-06
		671.43	3.29514e-06
		671.52	3.37824e-06
		671.61	3.46334e-06
		671.7	3.55051e-06
		671.79	3.63977e-06
		671.88	3.7312e-06
		671.97	3.82482e-06
		672.06	3.92069e-06
		672.15	4.01887e-06
		672.24	4.1194e-06
		672.33	4.22234e-06
		672.42	4.32773e-06
		672.51	4.44947e-06
		672.6	4.56049e-06
		672.69	4.67416e-06
		672.78	4.79054e-06
		672.87	4.90969e-06
		672.96	5.03167e-06
		673.05	5.15654e-06
		673.14	5.28436e-06
		673.23	5.42889e-06
		673.32	5.56327e-06
		673.41	5.70082e-06
		673.5	5.84161e-06
		673.59	5.9857e-06
		673.68	6.13318e-06
		673.77	6.2841e-06
		673.86	6.45245e-06
		673.95	6.61102e-06
		674.04	6.7733e-06
		674.13	6.93935e-06
		674.22	7.10926e-06
		674.31	7.29685e-06
		674.4	7.47515e-06
		674.49	7.67135e-06
		674.58	7.85857e-06
		674.67	8.05013e-06
		674.76	8.25985e-06
		674.85	8.46069e-06
		674.94	8.67981e-06
		675.03	8.89051e-06
		675.12	9.10604e-06
		675.21	9.3265e-06
		675.3	9.55199e-06
		675.39	9.78263e-06
		675.48	1.00185e-05
		675.57	1.02598e-05
		675.66	1.05065e-05
		675.75	1.07587e-05
		675.84	1.10167e-05
		675.93	1.12805e-05
		676.02	1.15503e-05
		676.11	1.1826e-05
		676.2	1.2108e-05
		676.29	1.23963e-05
		676.38	1.26909e-05
		676.47	1.29922e-05
		676.56	1.33001e-05
		676.65	1.36149e-05
		676.74	1.39366e-05
		676.83	1.42654e-05
		676.92	1.46015e-05
		677.01	1.49449e-05
		677.1	1.52959e-05
		677.19	1.56546e-05
		677.28	1.6021e-05
		677.37	1.64231e-05
		677.46	1.68206e-05
		677.55	1.72128e-05
		677.64	1.76136e-05
		677.73	1.80231e-05
		677.82	1.84413e-05
		677.91	1.88686e-05
		678	1.93051e-05
		678.09	1.97509e-05
		678.18	2.02062e-05
		678.27	2.06847e-05
		678.36	2.11741e-05
		678.45	2.166e-05
		678.54	2.21563e-05
		678.63	2.26631e-05
		678.72	2.31805e-05
		678.81	2.37088e-05
		678.9	2.42483e-05
		678.99	2.4799e-05
		679.08	2.53612e-05
		679.17	2.59351e-05
		679.26	2.6521e-05
		679.35	2.7119e-05
		679.44	2.77432e-05
		679.53	2.83666e-05
		679.62	2.90029e-05
		679.71	2.96522e-05
		679.8	3.03148e-05
		679.89	3.09909e-05
		679.98	3.16808e-05
		680.07	3.23988e-05
		680.16	3.31176e-05
		680.25	3.38509e-05
		680.34	3.45991e-05
		680.43	3.53623e-05
		680.52	3.61408e-05
		680.61	3.69349e-05
		680.7	3.77448e-05
		680.79	3.85709e-05
		680.88	3.94133e-05
		680.97	4.02725e-05
		681.06	4.11486e-05
		681.15	4.20419e-05
		681.24	4.29528e-05
		681.33	4.38816e-05
		681.42	4.48285e-05
		681.51	4.57938e-05
		681.6	4.67778e-05
		681.69	4.77946e-05
		681.78	4.88175e-05
		681.87	4.98601e-05
		681.96	5.09226e-05
		682.05	5.20056e-05
		682.14	5.31092e-05
		682.23	5.42338e-05
		682.32	5.53798e-05
		682.41	5.65474e-05
		682.5	5.77371e-05
		682.59	5.89491e-05
		682.68	6.01979e-05
		682.77	6.14564e-05
		682.86	6.27383e-05
		682.95	6.40441e-05
		683.04	6.53741e-05
		683.13	6.67287e-05
		683.22	6.81083e-05
		683.31	6.95271e-05
		683.4	7.09584e-05
		683.49	7.2416e-05
		683.58	7.39001e-05
		683.67	7.54111e-05
		683.76	7.69633e-05
		683.85	7.85438e-05
		683.94	8.01394e-05
		684.03	8.17773e-05
		684.12	8.34311e-05
		684.21	8.51281e-05
		684.3	8.68416e-05
		684.39	8.86132e-05
		684.48	9.03889e-05
		684.57	9.21959e-05
		684.66	9.40347e-05
		684.75	9.59058e-05
		684.84	9.78095e-05
		684.93	9.97463e-05
		685.02	0.000101717
		685.11	0.000103735
		685.2	0.000105775
		685.29	0.000107849
		685.38	0.00010996
		685.47	0.000112106
		685.56	0.000114289
		685.65	0.000116509
		685.74	0.000118767
		685.83	0.000121076
		685.92	0.000123411
		686.01	0.000125785
		686.1	0.000128199
		686.19	0.000130667
		686.28	0.000133162
		686.37	0.000135698
		686.46	0.000138277
		686.55	0.000140897
		686.64	0.000143561
		686.73	0.000146268
		686.82	0.000149019
		686.91	0.000151815
		687	0.000154683
		687.09	0.000157571
		687.18	0.000160505
		687.27	0.000163486
		687.36	0.000166529
		687.45	0.000169606
		687.54	0.000172746
		687.63	0.000175922
		687.72	0.000179148
		687.81	0.000182438
		687.9	0.000185767
		687.99	0.000189147
		688.08	0.000192579
		688.17	0.000196065
		688.26	0.000199605
		688.35	0.000203199
		688.44	0.000206848
		688.53	0.000210552
		688.62	0.000214313
		688.71	0.000218131
		688.8	0.000222007
		688.89	0.000225941
		688.98	0.000229935
		689.07	0.000233988
		689.16	0.000238101
		689.25	0.000242275
		689.34	0.000246511
		689.43	0.00025081
		689.52	0.000255172
		689.61	0.000259611
		689.7	0.000264102
		689.79	0.000268658
		689.88	0.00027328
		689.97	0.000277969
		690.06	0.000282725
		690.15	0.000287577
		690.24	0.000292471
		690.33	0.00029745
		690.42	0.000302485
		690.51	0.000307592
		690.6	0.000312771
		690.69	0.000318022
		690.78	0.000323347
		690.87	0.000328747
		690.96	0.000334235
		691.05	0.000339786
		691.14	0.000345414
		691.23	0.000351119
		691.32	0.000356902
		691.41	0.000362764
		691.5	0.000368707
		691.59	0.000374729
		691.68	0.000380834
		691.77	0.000387021
		691.86	0.00039329
		691.95	0.000399644
		692.04	0.000406083
		692.13	0.000412607
		692.22	0.000419218
		692.31	0.000425916
		692.4	0.000432702
		692.49	0.000439577
		692.58	0.000446555
		692.67	0.000453611
		692.76	0.000460759
		692.85	0.000468
		692.94	0.000475347
		693.03	0.000482775
		693.12	0.000490299
		693.21	0.000497918
		693.3	0.000505635
		693.39	0.000513449
		693.48	0.000521362
		693.57	0.000529389
		693.66	0.000537503
		693.75	0.000545719
		693.84	0.00055405
		693.93	0.000562472
		694.02	0.000570999
		694.11	0.000579631
		694.2	0.000588368
		694.29	0.000597214
		694.38	0.000606181
		694.47	0.000615258
		694.56	0.000624432
		694.65	0.000633717
		694.74	0.000643114
		694.83	0.000652624
		694.92	0.000662249
		695.01	0.000671989
		695.1	0.000681844
		695.19	0.000691817
		695.28	0.000701909
		695.37	0.000712119
		695.46	0.00072245
		695.55	0.000732902
		695.64	0.000743476
		695.73	0.000754174
		695.82	0.000764996
		695.91	0.000775944
		696	0.000787018
		696.09	0.00079822
		696.18	0.000809551
		696.27	0.000821011
		696.36	0.000832603
		696.45	0.000844326
		696.54	0.000856183
		696.63	0.000868174
		696.72	0.000880315
		696.81	0.000892592
		696.9	0.000904994
		696.99	0.000917534
		697.08	0.000930215
		697.17	0.000943037
		697.26	0.000956001
		697.35	0.000969109
		697.44	0.000982362
		697.53	0.00099576
		697.62	0.00100931
		697.71	0.001023
		697.8	0.00103686
		697.89	0.00105085
		697.98	0.001065
		698.07	0.0010793
		698.16	0.00109375
		698.25	0.00110836
		698.34	0.00112313
		698.43	0.00113805
		698.52	0.00115314
		698.61	0.00116838
		698.7	0.00118379
		698.79	0.00119936
		698.88	0.00121511
		698.97	0.00123101
		699.06	0.00124708
		699.15	0.00126333
		699.24	0.00127974
		699.33	0.00129632
		699.42	0.00131307
		699.51	0.00133
		699.6	0.0013471
		699.69	0.00136438
		699.78	0.00138185
		699.87	0.00139949
		699.96	0.00141731
		700.05	0.00143531
		700.14	0.00145349
		700.23	0.00147186
		700.32	0.00149041
		700.41	0.00150916
		700.5	0.00152809
		700.59	0.00154722
		700.68	0.00156655
		700.77	0.00158606
		700.86	0.00160577
		700.95	0.00162567
		701.04	0.00164577
		701.13	0.00166609
		701.22	0.00168659
		701.31	0.0017073
		701.4	0.00172822
		701.49	0.00174934
		701.58	0.00177067
		701.67	0.00179222
		701.76	0.00181396
		701.85	0.00183592
		701.94	0.00185809
		702.03	0.00188048
		702.12	0.00190308
		702.21	0.0019259
		702.3	0.00194894
		702.39	0.00197221
		702.48	0.00199569
		702.57	0.00201942
		702.66	0.00204336
		702.75	0.00206752
		702.84	0.00209192
		702.93	0.00211656
		703.02	0.00214142
		703.11	0.00216653
		703.2	0.00219186
		703.29	0.00221742
		703.38	0.00224323
		703.47	0.00226928
		703.56	0.00229557
		703.65	0.00232211
		703.74	0.00234889
		703.83	0.00237591
		703.92	0.00240319
		704.01	0.00243072
		704.1	0.0024585
		704.19	0.00248653
		704.28	0.00251482
		704.37	0.00254337
		704.46	0.00257217
		704.55	0.00260123
		704.64	0.00263056
		704.73	0.00266015
		704.82	0.00269001
		704.91	0.00272013
		705	0.00275052
		705.09	0.00278118
		705.18	0.00281211
		705.27	0.00284333
		705.36	0.00287481
		705.45	0.00290656
		705.54	0.00293859
		705.63	0.00297091
		705.72	0.0030035
		705.81	0.00303637
		705.9	0.00306953
		705.99	0.00310297
		706.08	0.00313672
		706.17	0.00317074
		706.26	0.00320504
		706.35	0.00323964
		706.44	0.00327453
		706.53	0.00330972
		706.62	0.0033452
		706.71	0.00338098
		706.8	0.00341705
		706.89	0.00345343
		706.98	0.0034901
		707.07	0.00352709
		707.16	0.00356437
		707.25	0.00360196
		707.34	0.00363985
		707.43	0.00367804
		707.52	0.00371655
		707.61	0.00375536
		707.7	0.00379449
		707.79	0.00383393
		707.88	0.00387367
		707.97	0.00391374
		708.06	0.00395411
		708.15	0.00399481
		708.24	0.00403582
		708.33	0.00407714
		708.42	0.00411879
		708.51	0.00416075
		708.6	0.00420304
		708.69	0.00424564
		708.78	0.00428858
		708.87	0.00433183
		708.96	0.00437541
		709.05	0.0044193
		709.14	0.00446353
		709.23	0.00450807
		709.32	0.00455295
		709.41	0.00459815
		709.5	0.00464367
		709.59	0.00468953
		709.68	0.00473571
		709.77	0.00478221
		709.86	0.00482905
		709.95	0.00487622
		710.04	0.00492371
		710.13	0.00497153
		710.22	0.00501968
		710.31	0.00506816
		710.4	0.00511697
		710.49	0.00516611
		710.58	0.00521558
		710.67	0.00526539
		710.76	0.00531552
		710.85	0.00536597
		710.94	0.00541675
		711.03	0.00546787
		711.12	0.0055193
		711.21	0.00557107
		711.3	0.00562316
		711.39	0.00567558
		711.48	0.00572832
		711.57	0.00578139
		711.66	0.00583478
		711.75	0.0058885
		711.84	0.00594254
		711.93	0.0059969
		712.02	0.00605158
		712.11	0.00610658
		712.2	0.0061619
		712.29	0.00621753
		712.38	0.00627349
		712.47	0.00632975
		712.56	0.00638634
		712.65	0.00644323
		712.74	0.00650045
		712.83	0.00655796
		712.92	0.00661579
		713.01	0.00667392
		713.1	0.00673235
		713.19	0.00679109
		713.28	0.00685012
		713.37	0.00690946
		713.46	0.00696909
		713.55	0.00702902
		713.64	0.00708925
		713.73	0.00714976
		713.82	0.00721056
		713.91	0.00727165
		714	0.00733302
		714.09	0.00739468
		714.18	0.00745661
		714.27	0.00751882
		714.36	0.0075813
		714.45	0.00764406
		714.54	0.00770708
		714.63	0.00777038
		714.72	0.00783393
		714.81	0.00789774
		714.9	0.00796181
		714.99	0.00802614
		715.08	0.00809071
		715.17	0.00815554
		715.26	0.00822061
		715.35	0.00828591
		715.44	0.00835146
		715.53	0.00841724
		715.62	0.00848326
		715.71	0.0085495
		715.8	0.00861596
		715.89	0.00868266
		715.98	0.00874956
		716.07	0.00881667
		716.16	0.00888399
		716.25	0.00895152
		716.34	0.00901924
		716.43	0.00908717
		716.52	0.00915528
		716.61	0.00922359
		716.7	0.00929207
		716.79	0.00936074
		716.88	0.00942959
		716.97	0.0094986
		717.06	0.00956778
		717.15	0.00963713
		717.24	0.00970663
		717.33	0.00977629
		717.42	0.00984609
		717.51	0.00991604
		717.6	0.00998613
		717.69	0.0100563
		717.78	0.0101267
		717.87	0.0101972
		717.96	0.0102678
		718.05	0.0103385
		718.14	0.0104093
		718.23	0.0104802
		718.32	0.0105513
		718.41	0.0106224
		718.5	0.0106936
		718.59	0.0107649
		718.68	0.0108363
		718.77	0.0109077
		718.86	0.0109792
		718.95	0.0110508
		719.04	0.0111225
		719.13	0.0111942
		719.22	0.0112659
		719.31	0.0113377
		719.4	0.0114095
		719.49	0.0114814
		719.58	0.0115532
		719.67	0.0116251
		719.76	0.011697
		719.85	0.011769
		719.94	0.0118409
		720.03	0.0119128
		720.12	0.0119847
		720.21	0.0120566
		720.3	0.0121285
		720.39	0.0122004
		720.48	0.0122722
		720.57	0.012344
		720.66	0.0124158
		720.75	0.0124875
		720.84	0.0125592
		720.93	0.0126308
		721.02	0.0127023
		721.11	0.0127738
		721.2	0.0128452
		721.29	0.0129165
		721.38	0.0129877
		721.47	0.0130589
		721.56	0.0131299
		721.65	0.0132008
		721.74	0.0132717
		721.83	0.0133424
		721.92	0.013413
		722.01	0.0134835
		722.1	0.0135538
		722.19	0.013624
		722.28	0.0136941
		722.37	0.013764
		722.46	0.0138338
		722.55	0.0139034
		722.64	0.0139729
		722.73	0.0140422
		722.82	0.0141113
		722.91	0.0141802
		723	0.014249
		723.09	0.0143175
		723.18	0.0143859
		723.27	0.014454
		723.36	0.014522
		723.45	0.0145898
		723.54	0.0146573
		723.63	0.0147246
		723.72	0.0147917
		723.81	0.0148586
		723.9	0.0149252
		723.99	0.0149916
		724.08	0.0150577
		724.17	0.0151236
		724.26	0.0151893
		724.35	0.0152547
		724.44	0.0153198
		724.53	0.0153846
		724.62	0.0154492
		724.71	0.0155135
		724.8	0.0155776
		724.89	0.0156413
		724.98	0.0157047
		725.07	0.0157679
		725.16	0.0158307
		725.25	0.0158933
		725.34	0.0159555
		725.43	0.0160175
		725.52	0.0160791
		725.61	0.0161404
		725.7	0.0162014
		725.79	0.016262
		725.88	0.0163223
		725.97	0.0163823
		726.06	0.016442
		726.15	0.0165013
		726.24	0.0165602
		726.33	0.0166188
		726.42	0.0166771
		726.51	0.016735
		726.6	0.0167925
		726.69	0.0168497
		726.78	0.0169065
		726.87	0.0169629
		726.96	0.017019
		727.05	0.0170747
		727.14	0.01713
		727.23	0.0171849
		727.32	0.0172395
		727.41	0.0172936
		727.5	0.0173474
		727.59	0.0174008
		727.68	0.0174538
		727.77	0.0175063
		727.86	0.0175585
		727.95	0.0176103
		728.04	0.0176617
		728.13	0.0177126
		728.22	0.0177632
		728.31	0.0178133
		728.4	0.017863
		728.49	0.0179123
		728.58	0.0179612
		728.67	0.0180097
		728.76	0.0180577
		728.85	0.0181053
		728.94	0.0181525
		729.03	0.0181992
		729.12	0.0182456
		729.21	0.0182914
		729.3	0.0183369
		729.39	0.0183819
		729.48	0.0184265
		729.57	0.0184706
		729.66	0.0185143
		729.75	0.0185576
		729.84	0.0186004
		729.93	0.0186427
		730.02	0.0186847
		730.11	0.0187261
		730.2	0.0187671
		730.29	0.0188077
		730.38	0.0188478
		730.47	0.0188875
		730.56	0.0189267
		730.65	0.0189654
		730.74	0.0190037
		730.83	0.0190416
		730.92	0.019079
		731.01	0.0191159
		731.1	0.0191524
		731.19	0.0191884
		731.28	0.0192239
		731.37	0.019259
		731.46	0.0192936
		731.55	0.0193278
		731.64	0.0193615
		731.73	0.0193947
		731.82	0.0194275
		731.91	0.0194598
		732	0.0194916
		732.09	0.019523
		732.18	0.0195539
		732.27	0.0195844
		732.36	0.0196143
		732.45	0.0196438
		732.54	0.0196729
		732.63	0.0197015
		732.72	0.0197296
		732.81	0.0197572
		732.9	0.0197844
		732.99	0.0198111
		733.08	0.0198373
		733.17	0.0198631
		733.26	0.0198884
		733.35	0.0199132
		733.44	0.0199376
		733.53	0.0199615
		733.62	0.0199849
		733.71	0.0200079
		733.8	0.0200304
		733.89	0.0200524
		733.98	0.020074
		734.07	0.0200951
		734.16	0.0201157
		734.25	0.0201359
		734.34	0.0201556
		734.43	0.0201748
		734.52	0.0201936
		734.61	0.0202119
		734.7	0.0202297
		734.79	0.0202471
		734.88	0.020264
		734.97	0.0202805
		735.06	0.0202965
		735.15	0.020312
		735.24	0.020327
		735.33	0.0203416
		735.42	0.0203558
		735.51	0.0203694
		735.6	0.0203826
		735.69	0.0203954
		735.78	0.0204077
		735.87	0.0204195
		735.96	0.0204309
		736.05	0.0204418
		736.14	0.0204523
		736.23	0.0204623
		736.32	0.0204718
		736.41	0.0204809
		736.5	0.0204895
		736.59	0.0204977
		736.68	0.0205054
		736.77	0.0205127
		736.86	0.0205195
		736.95	0.0205259
		737.04	0.0205318
		737.13	0.0205372
		737.22	0.0205422
		737.31	0.0205468
		737.4	0.0205509
		737.49	0.0205545
		737.58	0.0205578
		737.67	0.0205605
		737.76	0.0205628
		737.85	0.0205647
		737.94	0.0205661
		738.03	0.0205671
		738.12	0.0205676
		738.21	0.0205677
		738.3	0.0205674
		738.39	0.0205666
		738.48	0.0205653
		738.57	0.0205637
		738.66	0.0205616
		738.75	0.020559
		738.84	0.020556
		738.93	0.0205526
		739.02	0.0205487
		739.11	0.0205444
		739.2	0.0205397
		739.29	0.0205345
		739.38	0.0205289
		739.47	0.0205229
		739.56	0.0205164
		739.65	0.0205095
		739.74	0.0205022
		739.83	0.0204944
		739.92	0.0204863
		740.01	0.0204776
		740.1	0.0204686
		740.19	0.0204591
		740.28	0.0204493
		740.37	0.020439
		740.46	0.0204282
		740.55	0.0204171
		740.64	0.0204055
		740.73	0.0203935
		740.82	0.0203811
		740.91	0.0203683
		741	0.020355
		741.09	0.0203414
		741.18	0.0203273
		741.27	0.0203128
		741.36	0.0202979
		741.45	0.0202826
		741.54	0.0202669
		741.63	0.0202507
		741.72	0.0202342
		741.81	0.0202172
		741.9	0.0201999
		741.99	0.0201821
		742.08	0.020164
		742.17	0.0201454
		742.26	0.0201265
		742.35	0.0201071
		742.44	0.0200873
		742.53	0.0200672
		742.62	0.0200466
		742.71	0.0200257
		742.8	0.0200044
		742.89	0.0199826
		742.98	0.0199605
		743.07	0.019938
		743.16	0.0199151
		743.25	0.0198918
		743.34	0.0198681
		743.43	0.0198441
		743.52	0.0198197
		743.61	0.0197948
		743.7	0.0197697
		743.79	0.0197441
		743.88	0.0197181
		743.97	0.0196918
		744.06	0.0196651
		744.15	0.0196381
		744.24	0.0196106
		744.33	0.0195828
		744.42	0.0195547
		744.51	0.0195261
		744.6	0.0194973
		744.69	0.019468
		744.78	0.0194384
		744.87	0.0194084
		744.96	0.0193781
		745.05	0.0193474
		745.14	0.0193164
		745.23	0.019285
		745.32	0.0192533
		745.41	0.0192212
		745.5	0.0191888
		745.59	0.019156
		745.68	0.0191229
		745.77	0.0190895
		745.86	0.0190557
		745.95	0.0190216
		746.04	0.0189872
		746.13	0.0189524
		746.22	0.0189173
		746.31	0.0188819
		746.4	0.0188462
		746.49	0.0188101
		746.58	0.0187738
		746.67	0.0187371
		746.76	0.0187001
		746.85	0.0186627
		746.94	0.0186251
		747.03	0.0185872
		747.12	0.0185489
		747.21	0.0185104
		747.3	0.0184716
		747.39	0.0184324
		747.48	0.018393
		747.57	0.0183533
		747.66	0.0183133
		747.75	0.018273
		747.84	0.0182324
		747.93	0.0181915
		748.02	0.0181504
		748.11	0.018109
		748.2	0.0180673
		748.29	0.0180254
		748.38	0.0179831
		748.47	0.0179407
		748.56	0.0178979
		748.65	0.0178549
		748.74	0.0178117
		748.83	0.0177681
		748.92	0.0177244
		749.01	0.0176804
		749.1	0.0176361
		749.19	0.0175916
		749.28	0.0175469
		749.37	0.017502
		749.46	0.0174568
		749.55	0.0174113
		749.64	0.0173657
		749.73	0.0173198
		749.82	0.0172737
		749.91	0.0172274
		750	0.0171809
		750.09	0.0171342
		750.18	0.0170873
		750.27	0.0170402
		750.36	0.0169928
		750.45	0.0169453
		750.54	0.0168976
		750.63	0.0168497
		750.72	0.0168016
		750.81	0.0167533
		750.9	0.0167049
		750.99	0.0166563
		751.08	0.0166075
		751.17	0.0165585
		751.26	0.0165094
		751.35	0.0164601
		751.44	0.0164107
		751.53	0.0163611
		751.62	0.0163113
		751.71	0.0162614
		751.8	0.0162114
		751.89	0.0161612
		751.98	0.0161109
		752.07	0.0160605
		752.16	0.0160099
		752.25	0.0159592
		752.34	0.0159084
		752.43	0.0158574
		752.52	0.0158064
		752.61	0.0157552
		752.7	0.015704
		752.79	0.0156526
		752.88	0.0156011
		752.97	0.0155495
		753.06	0.0154979
		753.15	0.0154461
		753.24	0.0153943
		753.33	0.0153424
		753.42	0.0152904
		753.51	0.0152384
		753.6	0.0151862
		753.69	0.015134
		753.78	0.0150818
		753.87	0.0150294
		753.96	0.0149771
		754.05	0.0149246
		754.14	0.0148722
		754.23	0.0148196
		754.32	0.0147671
		754.41	0.0147145
		754.5	0.0146619
		754.59	0.0146092
		754.68	0.0145565
		754.77	0.0145038
		754.86	0.0144511
		754.95	0.0143983
		755.04	0.0143455
		755.13	0.0142928
		755.22	0.01424
		755.31	0.0141872
		755.4	0.0141344
		755.49	0.0140817
		755.58	0.0140289
		755.67	0.0139761
		755.76	0.0139234
		755.85	0.0138707
		755.94	0.013818
		756.03	0.0137653
		756.12	0.0137126
		756.21	0.01366
		756.3	0.0136074
		756.39	0.0135549
		756.48	0.0135024
		756.57	0.0134499
		756.66	0.0133975
		756.75	0.0133451
		756.84	0.0132928
		756.93	0.0132405
		757.02	0.0131883
		757.11	0.0131361
		757.2	0.013084
		757.29	0.013032
		757.38	0.0129801
		757.47	0.0129282
		757.56	0.0128764
		757.65	0.0128246
		757.74	0.012773
		757.83	0.0127214
		757.92	0.0126699
		758.01	0.0126185
		758.1	0.0125672
		758.19	0.012516
		758.28	0.0124649
		758.37	0.0124138
		758.46	0.0123629
		758.55	0.012312
		758.64	0.0122613
		758.73	0.0122107
		758.82	0.0121601
		758.91	0.0121097
		759	0.0120594
		759.09	0.0120092
		759.18	0.0119591
		759.27	0.0119092
		759.36	0.0118593
		759.45	0.0118096
		759.54	0.01176
		759.63	0.0117105
		759.72	0.0116611
		759.81	0.0116119
		759.9	0.0115628
		759.99	0.0115138
		760.08	0.0114649
		760.17	0.0114162
		760.26	0.0113676
		760.35	0.0113191
		760.44	0.0112708
		760.53	0.0112226
		760.62	0.0111746
		760.71	0.0111266
		760.8	0.0110789
		760.89	0.0110312
		760.98	0.0109837
		761.07	0.0109364
		761.16	0.0108891
		761.25	0.0108421
		761.34	0.0107951
		761.43	0.0107483
		761.52	0.0107017
		761.61	0.0106552
		761.7	0.0106088
		761.79	0.0105626
		761.88	0.0105166
		761.97	0.0104707
		762.06	0.0104249
		762.15	0.0103793
		762.24	0.0103338
		762.33	0.0102885
		762.42	0.0102433
		762.51	0.0101983
		762.6	0.0101534
		762.69	0.0101086
		762.78	0.0100641
		762.87	0.0100196
		762.96	0.00997534
		763.05	0.0099312
		763.14	0.00988721
		763.23	0.00984336
		763.32	0.00979967
		763.41	0.00975612
		763.5	0.00971272
		763.59	0.00966947
		763.68	0.00962636
		763.77	0.0095834
		763.86	0.00954059
		763.95	0.00949792
		764.04	0.0094554
		764.13	0.00941302
		764.22	0.00937078
		764.31	0.00932869
		764.4	0.00928675
		764.49	0.00924494
		764.58	0.00920328
		764.67	0.00916176
		764.76	0.00912038
		764.85	0.00907915
		764.94	0.00903805
		765.03	0.00899709
		765.12	0.00895627
		765.21	0.00891559
		765.3	0.00887505
		765.39	0.00883464
		765.48	0.00879437
		765.57	0.00875423
		765.66	0.00871423
		765.75	0.00867436
		765.84	0.00863463
		765.93	0.00859503
		766.02	0.00855556
		766.11	0.00851622
		766.2	0.008477
		766.29	0.00843792
		766.38	0.00839897
		766.47	0.00836015
		766.56	0.00832145
		766.65	0.00828288
		766.74	0.00824444
		766.83	0.00820612
		766.92	0.00816792
		767.01	0.00812985
		767.1	0.00809188
		767.19	0.00805406
		767.28	0.00801636
		767.37	0.00797877
		767.46	0.00794131
		767.55	0.00790396
		767.64	0.00786674
		767.73	0.00782963
		767.82	0.00779264
		767.91	0.00775576
		768	0.007719
		768.09	0.00768235
		768.18	0.00764582
		768.27	0.0076094
		768.36	0.0075731
		768.45	0.0075369
		768.54	0.00750082
		768.63	0.00746485
		768.72	0.00742898
		768.81	0.00739323
		768.9	0.00735758
		768.99	0.00732205
		769.08	0.00728663
		769.17	0.0072513
		769.26	0.00721609
		769.35	0.00718099
		769.44	0.00714599
		769.53	0.0071111
		769.62	0.00707632
		769.71	0.00704164
		769.8	0.00700707
		769.89	0.0069726
		769.98	0.00693823
		770.07	0.00690397
		770.16	0.00686981
		770.25	0.00683575
		770.34	0.00680179
		770.43	0.00676794
		770.52	0.00673419
		770.61	0.00670054
		770.7	0.006667
		770.79	0.00663355
		770.88	0.00660021
		770.97	0.00656695
		771.06	0.00653381
		771.15	0.00650077
		771.24	0.00646783
		771.33	0.00643499
		771.42	0.00640225
		771.51	0.00636961
		771.6	0.00633707
		771.69	0.00630463
		771.78	0.0062723
		771.87	0.00624006
		771.96	0.00620792
		772.05	0.00617588
		772.14	0.00614394
		772.23	0.00611211
		772.32	0.00608037
		772.41	0.00604873
		772.5	0.0060172
		772.59	0.00598576
		772.68	0.00595443
		772.77	0.00592319
		772.86	0.00589206
		772.95	0.00586103
		773.04	0.0058301
		773.13	0.00579927
		773.22	0.00576854
		773.31	0.00573792
		773.4	0.00570739
		773.49	0.00567697
		773.58	0.00564665
		773.67	0.00561644
		773.76	0.00558632
		773.85	0.00555631
		773.94	0.00552639
		774.03	0.00549659
		774.12	0.00546689
		774.21	0.00543729
		774.3	0.0054078
		774.39	0.00537841
		774.48	0.00534913
		774.57	0.00531995
		774.66	0.00529088
		774.75	0.00526191
		774.84	0.00523305
		774.93	0.00520429
		775.02	0.00517564
		775.11	0.0051471
		775.2	0.00511867
		775.29	0.00509032
		775.38	0.0050621
		775.47	0.00503399
		775.56	0.00500598
		775.65	0.00497809
		775.74	0.0049503
		775.83	0.00492262
		775.92	0.00489505
		776.01	0.00486758
		776.1	0.00484023
		776.19	0.00481299
		776.28	0.00478585
		776.37	0.00475883
		776.46	0.00473192
		776.55	0.0047051
		776.64	0.00467841
		776.73	0.00465182
		776.82	0.00462535
		776.91	0.00459899
		777	0.00457274
		777.09	0.00454661
		777.18	0.00452058
		777.27	0.00449466
		777.36	0.00446886
		777.45	0.00444317
		777.54	0.0044176
		777.63	0.00439213
		777.72	0.00436678
		777.81	0.00434155
		777.9	0.00431642
		777.99	0.00429141
		778.08	0.00426651
		778.17	0.00424172
		778.26	0.00421705
		778.35	0.00419249
		778.44	0.00416804
		778.53	0.00414371
		778.62	0.00411948
		778.71	0.00409536
		778.8	0.00407137
		778.89	0.00404748
		778.98	0.00402371
		779.07	0.00400005
		779.16	0.00397651
		779.25	0.00395308
		779.34	0.00392974
		779.43	0.00390654
		779.52	0.00388344
		779.61	0.00386046
		779.7	0.00383759
		779.79	0.00381483
		779.88	0.00379217
		779.97	0.00376963
		780.06	0.0037472
		780.15	0.00372489
		780.24	0.00370269
		780.33	0.00368058
		780.42	0.0036586
		780.51	0.00363673
		780.6	0.00361497
		780.69	0.0035933
		780.78	0.00357176
		780.87	0.00355032
		780.96	0.003529
		781.05	0.00350778
		781.14	0.00348667
		781.23	0.00346567
		781.32	0.00344478
		781.41	0.00342399
		781.5	0.00340331
		781.59	0.00338274
		781.68	0.00336227
		781.77	0.00334191
		781.86	0.00332165
		781.95	0.0033015
		782.04	0.00328145
		782.13	0.0032615
		782.22	0.00324166
		782.31	0.00322193
		782.4	0.00320229
		782.49	0.00318276
		782.58	0.00316333
		782.67	0.003144
		782.76	0.00312477
		782.85	0.00310564
		782.94	0.00308661
		783.03	0.00306768
		783.12	0.00304885
		783.21	0.00303011
		783.3	0.00301148
		783.39	0.00299294
		783.48	0.0029745
		783.57	0.00295616
		783.66	0.00293791
		783.75	0.00291976
		783.84	0.0029017
		783.93	0.00288373
		784.02	0.00286586
		784.11	0.00284809
		784.2	0.0028304
		784.29	0.0028128
		784.38	0.0027953
		784.47	0.00277789
		784.56	0.00276056
		784.65	0.00274332
		784.74	0.00272618
		784.83	0.00270913
		784.92	0.00269215
		785.01	0.00267528
		785.1	0.00265849
		785.19	0.0026418
		785.28	0.00262518
		785.37	0.00260866
		785.46	0.0025922
		785.55	0.00257584
		785.64	0.00255957
		785.73	0.00254338
		785.82	0.00252726
		785.91	0.00251123
		786	0.00249529
		786.09	0.00247943
		786.18	0.00246365
		786.27	0.00244795
		786.36	0.00243233
		786.45	0.00241678
		786.54	0.00240132
		786.63	0.00238593
		786.72	0.00237063
		786.81	0.0023554
		786.9	0.00234023
		786.99	0.00232515
		787.08	0.00231015
		787.17	0.00229522
		787.26	0.00228037
		787.35	0.00226559
		787.44	0.00225087
		787.53	0.00223624
		787.62	0.00222168
		787.71	0.00220719
		787.8	0.00219278
		787.89	0.00217843
		787.98	0.00216416
		788.07	0.00214996
		788.16	0.00213582
		788.25	0.00212176
		788.34	0.00210775
		788.43	0.00209381
		788.52	0.00207995
		788.61	0.00206616
		788.7	0.00205244
		788.79	0.00203878
		788.88	0.00202519
		788.97	0.00201167
		789.06	0.00199821
		789.15	0.00198482
		789.24	0.00197148
		789.33	0.00195821
		789.42	0.00194502
		789.51	0.00193188
		789.6	0.00191881
		789.69	0.0019058
		789.78	0.00189285
		789.87	0.00187997
		789.96	0.00186714
		790.05	0.00185438
		790.14	0.00184168
		790.23	0.00182904
		790.32	0.00181647
		790.41	0.00180395
		790.5	0.00179149
		790.59	0.00177909
		790.68	0.00176675
		790.77	0.00175447
		790.86	0.00174225
		790.95	0.00173009
		791.04	0.00171798
		791.13	0.00170593
		791.22	0.00169395
		791.31	0.00168201
		791.4	0.00167014
		791.49	0.00165831
		791.58	0.00164655
		791.67	0.00163484
		791.76	0.00162319
		791.85	0.0016116
		791.94	0.00160006
		792.03	0.00158857
		792.12	0.00157713
		792.21	0.00156576
		792.3	0.00155444
		792.39	0.00154318
		792.48	0.00153197
		792.57	0.00152082
		792.66	0.00150972
		792.75	0.00149868
		792.84	0.00148769
		792.93	0.00147675
		793.02	0.00146586
		793.11	0.00145503
		793.2	0.00144424
		793.29	0.00143351
		793.38	0.00142284
		793.47	0.00141221
		793.56	0.00140165
		793.65	0.00139113
		793.74	0.00138065
		793.83	0.00137024
		793.92	0.00135987
		794.01	0.00134956
		794.1	0.0013393
		794.19	0.0013291
		794.28	0.00131894
		794.37	0.00130883
		794.46	0.00129878
		794.55	0.00128877
		794.64	0.00127882
		794.73	0.00126891
		794.82	0.00125906
		794.91	0.00124926
		795	0.0012395
		795.09	0.0012298
		795.18	0.00122015
		795.27	0.00121054
		795.36	0.00120099
		795.45	0.00119147
		795.54	0.001182
		795.63	0.00117258
		795.72	0.00116323
		795.81	0.00115392
		795.9	0.00114466
		795.99	0.00113545
		796.08	0.00112629
		796.17	0.00111718
		796.26	0.00110812
		796.35	0.00109911
		796.44	0.00109014
		796.53	0.00108122
		796.62	0.00107235
		796.71	0.00106352
		796.8	0.00105475
		796.89	0.00104601
		796.98	0.00103733
		797.07	0.00102871
		797.16	0.00102013
		797.25	0.00101159
		797.34	0.00100311
		797.43	0.000994669
		797.52	0.000986279
		797.61	0.000977936
		797.7	0.00096964
		797.79	0.000961391
		797.88	0.00095319
		797.97	0.000945036
		798.06	0.000936928
		798.15	0.000928855
		798.24	0.000920841
		798.33	0.000912848
		798.42	0.000904929
		798.51	0.000897057
		798.6	0.000889231
		798.69	0.000881451
		798.78	0.000873717
		798.87	0.00086603
		798.96	0.000858389
		799.05	0.000850794
		799.14	0.000843245
		799.23	0.000835716
		799.32	0.000828259
		799.41	0.000820849
		799.5	0.00081347
		799.59	0.000806151
		799.68	0.000798878
		799.77	0.000791649
		799.86	0.000784466
		799.95	0.000777316
		800.04	0.000770223
		800.13	0.000763163
		800.22	0.000756161
		800.31	0.000749204
		800.4	0.000742292
		800.49	0.000735424
		800.58	0.000728601
		800.67	0.000721823
		800.76	0.000715089
		800.85	0.000708399
		800.94	0.000701726
		801.03	0.000695125
		801.12	0.000688568
		801.21	0.000682055
		801.3	0.000675586
		801.39	0.00066916
		801.48	0.000662778
		801.57	0.000656439
		801.66	0.000650144
		801.75	0.000643892
		801.84	0.00063767
		801.93	0.000631505
		802.02	0.000625382
		802.11	0.000619302
		802.2	0.000613265
		802.29	0.000607271
		802.38	0.000601319
		802.47	0.000595409
		802.56	0.000589542
		802.65	0.000583716
		802.74	0.000577933
		802.83	0.000572192
		802.92	0.000566492
		803.01	0.000560834
		803.1	0.000555217
		803.19	0.000549642
		803.28	0.000544095
		803.37	0.000538602
		803.46	0.000533151
		803.55	0.00052774
		803.64	0.000522371
		803.73	0.000517041
		803.82	0.000511752
		803.91	0.000506504
		804	0.000501296
		804.09	0.000496127
		804.18	0.000490999
		804.27	0.00048591
		804.36	0.000480861
		804.45	0.000475852
		804.54	0.000470882
		804.63	0.000465951
		804.72	0.000461059
		804.81	0.000456205
		804.9	0.000451391
		804.99	0.000446615
		805.08	0.000441865
		805.17	0.000437166
		805.26	0.000432506
		805.35	0.000427883
		805.44	0.000423299
		805.53	0.000418738
		805.62	0.000414229
		805.71	0.000409758
		805.8	0.000405323
		805.89	0.000400926
		805.98	0.000396565
		806.07	0.000392242
		806.16	0.000387954
		806.25	0.00038369
		806.34	0.000379475
		806.43	0.000375297
		806.52	0.000371154
		806.61	0.000367047
		806.7	0.000362975
		806.79	0.000358939
		806.88	0.000354938
		806.97	0.000350972
		807.06	0.000347041
		807.15	0.000343144
		807.24	0.000339282
		807.33	0.000335454
		807.42	0.000331661
		807.51	0.000327901
		807.6	0.000324175
		807.69	0.000320482
		807.78	0.000316824
		807.87	0.000313185
		807.96	0.000309592
		808.05	0.000306033
		808.14	0.000302506
		808.23	0.000299012
		808.32	0.00029555
		808.41	0.000292121
		808.5	0.000288723
		808.59	0.000285357
		808.68	0.000282009
		808.77	0.000278707
		808.86	0.000275435
		808.95	0.000272195
		809.04	0.000268985
		809.13	0.000265807
		809.22	0.000262658
		809.31	0.00025954
		809.4	0.000256439
		809.49	0.000253382
		809.58	0.000250354
		809.67	0.000247355
		809.76	0.000244387
		809.85	0.000241447
		809.94	0.000238536
		810.03	0.000235654
		810.12	0.000232801
		810.21	0.000229976
		810.3	0.000227179
		810.39	0.00022441
		810.48	0.000221669
		810.57	0.000218956
		810.66	0.00021627
		810.75	0.000213611
		810.84	0.000210967
		810.93	0.000208363
		811.02	0.000205785
		811.11	0.000203234
		811.2	0.00020071
		811.29	0.000198211
		811.38	0.000195739
		811.47	0.000193292
		811.56	0.000190858
		811.65	0.000188463
		811.74	0.000186092
		811.83	0.000183747
		811.92	0.000181427
		812.01	0.000179131
		812.1	0.000176847
		812.19	0.0001746
		812.28	0.000172378
		812.37	0.000170179
		812.46	0.000168004
		812.55	0.000165853
		812.64	0.000163725
		812.73	0.00016162
		812.82	0.000159538
		812.91	0.000157479
		813	0.000155442
		813.09	0.000153428
		813.18	0.000151436
		813.27	0.000149466
		813.36	0.000147518
		813.45	0.000145578
		813.54	0.000143674
		813.63	0.000141791
		813.72	0.000139929
		813.81	0.000138088
		813.9	0.000136268
		813.99	0.000134468
		814.08	0.000132689
		814.17	0.00013093
		814.26	0.000129192
		814.35	0.000127473
		814.44	0.000125774
		814.53	0.000124094
		814.62	0.000122421
		814.71	0.00012078
		814.8	0.000119159
		814.89	0.000117543
		814.98	0.000115959
		815.07	0.000114394
		815.16	0.000112848
		815.25	0.000111319
		815.34	0.000109809
		815.43	0.000108316
		815.52	0.000106841
		815.61	0.000105384
		815.7	0.000103944
		815.79	0.000102521
		815.88	0.000101115
		815.97	9.97264e-05
		816.06	9.83543e-05
		816.15	9.69987e-05
		816.24	9.56595e-05
		816.33	9.43365e-05
		816.42	9.30297e-05
		816.51	9.17387e-05
		816.6	9.04636e-05
		816.69	8.92041e-05
		816.78	8.79466e-05
		816.87	8.67182e-05
		816.96	8.55051e-05
		817.05	8.43069e-05
		817.14	8.31236e-05
		817.23	8.1955e-05
		817.32	8.08009e-05
		817.41	7.96612e-05
		817.5	7.85358e-05
		817.59	7.74246e-05
		817.68	7.63272e-05
		817.77	7.52438e-05
		817.86	7.4174e-05
		817.95	7.31177e-05
		818.04	7.20748e-05
		818.13	7.10453e-05
		818.22	7.00288e-05
		818.31	6.90253e-05
		818.4	6.80347e-05
		818.49	6.70567e-05
		818.58	6.60914e-05
		818.67	6.51385e-05
		818.76	6.41979e-05
		818.85	6.32695e-05
		818.94	6.23531e-05
		819.03	6.14486e-05
		819.12	6.05559e-05
		819.21	5.96749e-05
		819.3	5.88054e-05
		819.39	5.79473e-05
		819.48	5.71005e-05
		819.57	5.62649e-05
		819.66	5.54402e-05
		819.75	5.46265e-05
		819.84	5.38236e-05
		819.93	5.30313e-05
		820.02	5.2236e-05
		820.11	5.14652e-05
		820.2	5.07047e-05
		820.29	4.99543e-05
		820.38	4.9214e-05
		820.47	4.84837e-05
		820.56	4.77631e-05
		820.65	4.70523e-05
		820.74	4.63511e-05
		820.83	4.56594e-05
		820.92	4.4977e-05
		821.01	4.43039e-05
		821.1	4.364e-05
		821.19	4.29851e-05
		821.28	4.23392e-05
		821.37	4.17021e-05
		821.46	4.10738e-05
		821.55	4.04541e-05
		821.64	3.98429e-05
		821.73	3.92401e-05
		821.82	3.86457e-05
		821.91	3.80596e-05
		822	3.74815e-05
		822.09	3.69115e-05
		822.18	3.63494e-05
		822.27	3.57951e-05
		822.36	3.52486e-05
		822.45	3.47098e-05
		822.54	3.41785e-05
		822.63	3.36546e-05
		822.72	3.31382e-05
		822.81	3.2629e-05
		822.9	3.2127e-05
		822.99	3.16321e-05
		823.08	3.11442e-05
		823.17	3.06632e-05
		823.26	3.01891e-05
		823.35	2.97217e-05
		823.44	2.9261e-05
		823.53	2.88069e-05
		823.62	2.83593e-05
		823.71	2.79181e-05
		823.8	2.74698e-05
		823.89	2.70416e-05
		823.98	2.66195e-05
		824.07	2.62036e-05
		824.16	2.57936e-05
		824.25	2.53896e-05
		824.34	2.49914e-05
		824.43	2.4599e-05
		824.52	2.42123e-05
		824.61	2.38312e-05
		824.7	2.34557e-05
		824.79	2.30857e-05
		824.88	2.27211e-05
		824.97	2.23618e-05
		825.06	2.20078e-05
		825.15	2.1659e-05
		825.24	2.13153e-05
		825.33	2.09767e-05
		825.42	2.06431e-05
		825.51	2.03144e-05
		825.6	1.99906e-05
		825.69	1.96716e-05
		825.78	1.93573e-05
		825.87	1.90477e-05
		825.96	1.87427e-05
		826.05	1.84423e-05
		826.14	1.81463e-05
		826.23	1.78548e-05
		826.32	1.75676e-05
		826.41	1.72847e-05
		826.5	1.70061e-05
		826.59	1.67317e-05
		826.68	1.64614e-05
		826.77	1.61952e-05
		826.86	1.5933e-05
		826.95	1.56748e-05
		827.04	1.54204e-05
		827.13	1.517e-05
		827.22	1.49233e-05
		827.31	1.46804e-05
		827.4	1.44412e-05
		827.49	1.42056e-05
		827.58	1.39737e-05
		827.67	1.37453e-05
		827.76	1.35203e-05
		827.85	1.32989e-05
		827.94	1.30808e-05
		828.03	1.2866e-05
		828.12	1.26546e-05
		828.21	1.24465e-05
		828.3	1.22415e-05
		828.39	1.20397e-05
		828.48	1.18411e-05
		828.57	1.16455e-05
		828.66	1.14529e-05
		828.75	1.12633e-05
		828.84	1.10767e-05
		828.93	1.0893e-05
		829.02	1.07121e-05
		829.11	1.05341e-05
		829.2	1.03589e-05
		829.29	1.01863e-05
		829.38	1.00165e-05
		829.47	9.84939e-06
		829.56	9.68486e-06
		829.65	9.52292e-06
		829.74	9.36353e-06
		829.83	9.20665e-06
		829.92	9.05225e-06
		830.01	8.90028e-06
		830.1	8.75071e-06
		830.19	8.60352e-06
		830.28	8.45865e-06
		830.37	8.31608e-06
		830.46	8.17578e-06
		830.55	8.03771e-06
		830.64	7.88866e-06
		830.73	7.75536e-06
		830.82	7.62419e-06
		830.91	7.4951e-06
		831	7.36807e-06
		831.09	7.24307e-06
		831.18	7.12006e-06
		831.27	6.99903e-06
		831.36	6.87993e-06
		831.45	6.76275e-06
		831.54	6.64745e-06
		831.63	6.534e-06
		831.72	6.42238e-06
		831.81	6.31255e-06
		831.9	6.2045e-06
		831.99	6.09819e-06
		832.08	5.98026e-06
		832.17	5.87774e-06
		832.26	5.77688e-06
		832.35	5.67764e-06
		832.44	5.58002e-06
		832.53	5.48398e-06
		832.62	5.38949e-06
		832.71	5.29655e-06
		832.8	5.20511e-06
		832.89	5.11517e-06
		832.98	5.02669e-06
		833.07	4.93966e-06
		833.16	4.85405e-06
		833.25	4.76984e-06
		833.34	4.68702e-06
		833.43	4.60555e-06
		833.52	4.52541e-06
		833.61	4.4466e-06
		833.7	4.36908e-06
		833.79	4.29284e-06
		833.88	4.21785e-06
		833.97	4.1441e-06
		834.06	4.07158e-06
		834.15	4.00025e-06
		834.24	3.9301e-06
		834.33	3.86111e-06
		834.42	3.79327e-06
		834.51	3.72656e-06
		834.6	3.66096e-06
		834.69	3.59645e-06
		834.78	3.53301e-06
		834.87	3.47063e-06
		834.96	3.40929e-06
		835.05	3.34898e-06
		835.14	3.28968e-06
		835.23	3.23137e-06
		835.32	3.17404e-06
		835.41	3.11767e-06
		835.5	3.06225e-06
		835.59	3.00776e-06
		835.68	2.95419e-06
		835.77	2.90152e-06
		835.86	2.84974e-06
		835.95	2.79883e-06
		836.04	2.74879e-06
		836.13	2.69959e-06
		836.22	2.65123e-06
		836.31	2.60368e-06
		836.4	2.55695e-06
		836.49	2.511e-06
		836.58	2.46584e-06
		836.67	2.42145e-06
		836.76	2.37781e-06
		836.85	2.32164e-06
		836.94	2.27988e-06
		837.03	2.23883e-06
		837.12	2.19848e-06
		837.21	2.15882e-06
		837.3	2.11983e-06
		837.39	2.08151e-06
		837.48	2.04384e-06
		837.57	2.00682e-06
		837.66	1.97043e-06
		837.75	1.93466e-06
		837.84	1.89951e-06
		837.93	1.86496e-06
		838.02	1.831e-06
		838.11	1.79763e-06
		838.2	1.76483e-06
		838.29	1.7326e-06
		838.38	1.70093e-06
		838.47	1.6698e-06
		838.56	1.63921e-06
		838.65	1.60915e-06
		838.74	1.57961e-06
		838.83	1.55058e-06
		838.92	1.52206e-06
		839.01	1.49403e-06
		839.1	1.46649e-06
		839.19	1.43944e-06
		839.28	1.41285e-06
		839.37	1.38673e-06
		839.46	1.36106e-06
		839.55	1.33585e-06
		839.64	1.31107e-06
		839.73	1.28673e-06
		839.82	1.26282e-06
		839.91	1.23933e-06
[truncated: 1 more rows]

## Sheet: PlotDat3
Source sheet	data	900	0
Plot name	ProbDens3	900.65	0
Plot Type	16	901.3	0
1st free col	5	901.95	0
Sigma Level	2	902.6	0
Absolute Errs	TRUE	903.25	0
Symbol Type	5	903.9	0
Inverse Plot	FALSE	904.55	0
Color Plot	FALSE	905.2	0
3D plot	FALSE	905.85	0
Linear	FALSE	906.5	0
Data Range	Z163:AA198	907.15	0
Filled Symbols	TRUE	907.8	0
ConcAge	FALSE	908.45	0
ConcSwap	FALSE	909.1	0
1st Symbol-row	1	909.75	0
		910.4	0
		911.05	0
		911.7	0
		912.35	0
		913	0
		913.65	0
		914.3	0
		914.95	0
		915.6	0
		916.25	0
		916.9	0
		917.55	0
		918.2	0
		918.85	0
		919.5	0
		920.15	0
		920.8	0
		921.45	0
		922.1	0
		922.75	0
		923.4	0
		924.05	0
		924.7	0
		925.35	0
		926	0
		926.65	0
		927.3	0
		927.95	0
		928.6	0
		929.25	0
		929.9	0
		930.55	0
		931.2	0
		931.85	0
		932.5	0
		933.15	0
		933.8	2.90409e-08
		934.45	3.21753e-08
		935.1	3.56282e-08
		935.75	3.94299e-08
		936.4	4.3613e-08
		937.05	4.82132e-08
		937.7	5.32691e-08
		938.35	5.88226e-08
		939	6.49191e-08
		939.65	7.16078e-08
		940.3	7.89418e-08
		940.95	8.69789e-08
		941.6	9.57811e-08
		942.25	1.05416e-07
		942.9	1.15955e-07
		943.55	1.27478e-07
		944.2	1.40068e-07
		944.85	1.53816e-07
		945.5	1.6882e-07
		946.15	1.85185e-07
		946.8	2.03024e-07
		947.45	2.22458e-07
		948.1	2.43618e-07
		948.75	2.66642e-07
		949.4	2.91681e-07
		950.05	3.18894e-07
		950.7	3.77896e-07
		951.35	4.13338e-07
		952	4.51865e-07
		952.65	4.9372e-07
		953.3	5.39168e-07
		953.95	5.88487e-07
		954.6	6.41978e-07
		955.25	6.99961e-07
		955.9	7.62777e-07
		956.55	8.30791e-07
		957.2	9.04392e-07
		957.85	9.83994e-07
		958.5	1.07004e-06
		959.15	1.16299e-06
		959.8	1.26335e-06
		960.45	1.37165e-06
		961.1	1.48845e-06
		961.75	1.61434e-06
		962.4	1.74996e-06
		963.05	1.89598e-06
		963.7	2.05309e-06
		964.35	2.22206e-06
		965	2.40367e-06
		965.65	2.59875e-06
		966.3	2.8082e-06
		966.95	3.0636e-06
		967.6	3.30824e-06
		968.25	3.57058e-06
		968.9	3.85175e-06
		969.55	4.15293e-06
		970.2	4.47537e-06
		970.85	4.82039e-06
		971.5	5.18934e-06
		972.15	5.58368e-06
		972.8	6.00493e-06
		973.45	6.45467e-06
		974.1	6.93456e-06
		974.75	7.44634e-06
		975.4	7.99183e-06
		976.05	8.57293e-06
		976.7	9.19161e-06
		977.35	9.84996e-06
		978	1.05501e-05
		978.65	1.12943e-05
		979.3	1.20849e-05
		979.95	1.29243e-05
		980.6	1.38151e-05
		981.25	1.47598e-05
		981.9	1.57612e-05
		982.55	1.6822e-05
		983.2	1.79452e-05
		983.85	1.91339e-05
		984.5	2.0391e-05
		985.15	2.17198e-05
		985.8	2.31237e-05
		986.45	2.4606e-05
		987.1	2.61702e-05
		987.75	2.78199e-05
		988.4	2.95589e-05
		989.05	3.1391e-05
		989.7	3.33201e-05
		990.35	3.535e-05
		991	3.74851e-05
		991.65	3.97293e-05
		992.3	4.2087e-05
		992.95	4.45625e-05
		993.6	4.71603e-05
		994.25	4.98847e-05
		994.9	5.27405e-05
		995.55	5.57322e-05
		996.2	5.88646e-05
		996.85	6.21423e-05
		997.5	6.55702e-05
		998.15	6.91531e-05
		998.8	7.28959e-05
		999.45	7.68034e-05
		1000.1	8.08806e-05
		1000.75	8.51324e-05
		1001.4	8.95637e-05
		1002.05	9.41794e-05
		1002.7	9.89844e-05
		1003.35	0.000103984
		1004	0.000109182
		1004.65	0.000114584
		1005.3	0.000120194
		1005.95	0.000126017
		1006.6	0.000132058
		1007.25	0.000138321
		1007.9	0.00014481
		1008.55	0.000151529
		1009.2	0.000158483
		1009.85	0.000165675
		1010.5	0.000173109
		1011.15	0.000180788
		1011.8	0.000188716
		1012.45	0.000196895
		1013.1	0.000205329
		1013.75	0.00021402
		1014.4	0.000222969
		1015.05	0.00023218
		1015.7	0.000241654
		1016.35	0.000251391
		1017	0.000261394
		1017.65	0.000271662
		1018.3	0.000282196
		1018.95	0.000292995
		1019.6	0.000304059
		1020.25	0.000315388
		1020.9	0.000326979
		1021.55	0.00033883
		1022.2	0.00035094
		1022.85	0.000363305
		1023.5	0.000375923
		1024.15	0.000388788
		1024.8	0.000401898
		1025.45	0.000415246
		1026.1	0.000428828
		1026.75	0.000442637
		1027.4	0.000456667
		1028.05	0.000470911
		1028.7	0.000485361
		1029.35	0.000500009
		1030	0.000514847
		1030.65	0.000529864
		1031.3	0.000545051
		1031.95	0.000560397
		1032.6	0.000575891
		1033.25	0.000591522
		1033.9	0.000607278
		1034.55	0.000623145
		1035.2	0.00063911
		1035.85	0.00065516
		1036.5	0.00067128
		1037.15	0.000687455
		1037.8	0.00070367
		1038.45	0.00071991
		1039.1	0.000736157
		1039.75	0.000752396
		1040.4	0.000768609
		1041.05	0.000784778
		1041.7	0.000800887
		1042.35	0.000816917
		1043	0.000832849
		1043.65	0.000848665
		1044.3	0.000864346
		1044.95	0.000879872
		1045.6	0.000895225
		1046.25	0.000910385
		1046.9	0.000925333
		1047.55	0.000940049
		1048.2	0.000954514
		1048.85	0.000968707
		1049.5	0.00098261
		1050.15	0.000996204
		1050.8	0.00100947
		1051.45	0.00102239
		1052.1	0.00103494
		1052.75	0.0010471
		1053.4	0.00105886
		1054.05	0.0010702
		1054.7	0.00108111
		1055.35	0.00109158
		1056	0.00110156
		1056.65	0.00111106
		1057.3	0.00112005
		1057.95	0.00112853
		1058.6	0.00113647
		1059.25	0.00114387
		1059.9	0.00115072
		1060.55	0.001157
		1061.2	0.0011627
		1061.85	0.00116781
		1062.5	0.00117232
		1063.15	0.00117623
		1063.8	0.00117953
		1064.45	0.0011822
		1065.1	0.00118425
		1065.75	0.00118568
		1066.4	0.00118647
		1067.05	0.00118662
		1067.7	0.00118617
		1068.35	0.00118506
		1069	0.00118334
		1069.65	0.00118096
		1070.3	0.00117795
		1070.95	0.00117431
		1071.6	0.00117006
		1072.25	0.00116519
		1072.9	0.00115971
		1073.55	0.00115363
		1074.2	0.00114696
		1074.85	0.00113971
		1075.5	0.00113192
		1076.15	0.00112355
		1076.8	0.00111464
		1077.45	0.0011052
		1078.1	0.00109524
		1078.75	0.00108478
		1079.4	0.00107385
		1080.05	0.00106244
		1080.7	0.00105059
		1081.35	0.00103832
		1082	0.00102563
		1082.65	0.00101255
		1083.3	0.000999112
		1083.95	0.000985321
		1084.6	0.000971206
		1085.25	0.000956787
		1085.9	0.000942087
		1086.55	0.00092713
		1087.2	0.000911937
		1087.85	0.000896533
		1088.5	0.000880941
		1089.15	0.000865185
		1089.8	0.000849288
		1090.45	0.000833275
		1091.1	0.00081717
		1091.75	0.000800997
		1092.4	0.00078478
		1093.05	0.000768542
		1093.7	0.000752308
		1094.35	0.00073613
		1095	0.000719976
		1095.65	0.000703896
		1096.3	0.000687912
		1096.95	0.000672047
		1097.6	0.000656324
		1098.25	0.000640765
		1098.9	0.00062539
		1099.55	0.000610221
		1100.2	0.000595279
		1100.85	0.000580583
		1101.5	0.000566154
		1102.15	0.00055201
		1102.8	0.00053817
		1103.45	0.000524652
		1104.1	0.000511473
		1104.75	0.00049865
		1105.4	0.000486201
		1106.05	0.000474139
		1106.7	0.00046248
		1107.35	0.000451239
		1108	0.00044043
		1108.65	0.000430064
		1109.3	0.000420156
		1109.95	0.000410716
		1110.6	0.000401756
		1111.25	0.000393286
		1111.9	0.000385317
		1112.55	0.000377856
		1113.2	0.000370913
		1113.85	0.000364495
		1114.5	0.00035861
		1115.15	0.000353264
		1115.8	0.000348462
		1116.45	0.00034421
		1117.1	0.000340512
		1117.75	0.000337372
		1118.4	0.000334793
		1119.05	0.000332778
		1119.7	0.000331327
		1120.35	0.000330443
		1121	0.000330125
		1121.65	0.000330374
		1122.3	0.000331188
		1122.95	0.000332566
		1123.6	0.000334506
		1124.25	0.000337005
		1124.9	0.000340059
		1125.55	0.000343664
		1126.2	0.000347816
		1126.85	0.000352509
		1127.5	0.000357737
		1128.15	0.000363493
		1128.8	0.00036977
		1129.45	0.000376561
		1130.1	0.000383856
		1130.75	0.000391647
		1131.4	0.000399924
		1132.05	0.000408677
		1132.7	0.000417894
		1133.35	0.000427565
		1134	0.000437677
		1134.65	0.000448218
		1135.3	0.000459174
		1135.95	0.000470533
		1136.6	0.00048228
		1137.25	0.000494401
		1137.9	0.000506881
		1138.55	0.000519703
		1139.2	0.000532853
		1139.85	0.000546314
		1140.5	0.000560068
		1141.15	0.0005741
		1141.8	0.000588392
		1142.45	0.000602926
		1143.1	0.000617683
		1143.75	0.000632646
		1144.4	0.000647796
		1145.05	0.000663114
		1145.7	0.000678581
		1146.35	0.000694178
		1147	0.000709886
		1147.65	0.000725685
		1148.3	0.000741557
		1148.95	0.00075748
		1149.6	0.000773436
		1150.25	0.000789406
		1150.9	0.000805369
		1151.55	0.000821306
		1152.2	0.000837199
		1152.85	0.000853028
		1153.5	0.000868774
		1154.15	0.000884418
		1154.8	0.000899942
		1155.45	0.000915327
		1156.1	0.000930556
		1156.75	0.00094561
		1157.4	0.000960473
		1158.05	0.000975127
		1158.7	0.000989556
		1159.35	0.00100374
		1160	0.00101767
		1160.65	0.00103133
		1161.3	0.00104474
		1161.95	0.00105781
		1162.6	0.00107057
		1163.25	0.00108301
		1163.9	0.0010951
		1164.55	0.00110684
		1165.2	0.00111822
		1165.85	0.00112922
		1166.5	0.00113985
		1167.15	0.00115007
		1167.8	0.0011599
		1168.45	0.00116931
		1169.1	0.00117831
		1169.75	0.00118689
		1170.4	0.00119503
		1171.05	0.00120274
		1171.7	0.00121001
		1172.35	0.00121683
		1173	0.00122321
		1173.65	0.00122914
		1174.3	0.00123462
		1174.95	0.00123964
		1175.6	0.0012442
		1176.25	0.00124832
		1176.9	0.00125201
		1177.55	0.00125524
		1178.2	0.00125803
		1178.85	0.00126038
		1179.5	0.0012623
		1180.15	0.00126379
		1180.8	0.00126486
		1181.45	0.00126549
		1182.1	0.00126574
		1182.75	0.00126563
		1183.4	0.0012651
		1184.05	0.00126419
		1184.7	0.00126292
		1185.35	0.0012613
		1186	0.00125934
		1186.65	0.00125705
		1187.3	0.00125446
		1187.95	0.00125158
		1188.6	0.00124839
		1189.25	0.00124497
		1189.9	0.00124131
		1190.55	0.00123743
		1191.2	0.00123335
		1191.85	0.00122908
		1192.5	0.00122466
		1193.15	0.0012201
		1193.8	0.00121542
		1194.45	0.00121066
		1195.1	0.00120582
		1195.75	0.00120094
		1196.4	0.00119605
		1197.05	0.00119116
		1197.7	0.0011863
		1198.35	0.0011815
		1199	0.00117678
		1199.65	0.00117217
		1200.3	0.00116769
		1200.95	0.00116337
		1201.6	0.00115924
		1202.25	0.00115532
		1202.9	0.00115164
		1203.55	0.00114821
		1204.2	0.00114507
		1204.85	0.00114222
		1205.5	0.00113971
		1206.15	0.00113754
		1206.8	0.00113573
		1207.45	0.0011343
		1208.1	0.00113328
		1208.75	0.00113266
		1209.4	0.00113247
		1210.05	0.00113272
		1210.7	0.00113341
		1211.35	0.00113455
		1212	0.00113614
		1212.65	0.0011382
		1213.3	0.00114071
		1213.95	0.00114367
		1214.6	0.00114708
		1215.25	0.00115094
		1215.9	0.00115522
		1216.55	0.00115992
		1217.2	0.00116502
		1217.85	0.0011705
		1218.5	0.00117634
		1219.15	0.00118252
		1219.8	0.00118901
		1220.45	0.00119579
		1221.1	0.00120281
		1221.75	0.00121005
		1222.4	0.00121748
		1223.05	0.00122505
		1223.7	0.00123273
		1224.35	0.00124048
		1225	0.00124825
		1225.65	0.00125601
		1226.3	0.00126371
		1226.95	0.0012713
		1227.6	0.00127875
		1228.25	0.001286
		1228.9	0.00129302
		1229.55	0.00129975
		1230.2	0.00130617
		1230.85	0.00131222
		1231.5	0.00131786
		1232.15	0.00132306
		1232.8	0.00132778
		1233.45	0.00133198
		1234.1	0.00133564
		1234.75	0.00133871
		1235.4	0.00134117
		1236.05	0.00134301
		1236.7	0.00134418
		1237.35	0.00134468
		1238	0.0013445
		1238.65	0.00134361
		1239.3	0.00134201
		1239.95	0.0013397
		1240.6	0.00133667
		1241.25	0.00133293
		1241.9	0.00132847
		1242.55	0.00132332
		1243.2	0.00131748
		1243.85	0.00131096
		1244.5	0.00130379
		1245.15	0.00129599
		1245.8	0.00128757
		1246.45	0.00127858
		1247.1	0.00126903
		1247.75	0.00125896
		1248.4	0.00124841
		1249.05	0.0012374
		1249.7	0.00122598
		1250.35	0.00121418
		1251	0.00120204
		1251.65	0.0011896
		1252.3	0.00117691
		1252.95	0.001164
		1253.6	0.00115091
		1254.25	0.00113769
		1254.9	0.00112437
		1255.55	0.001111
		1256.2	0.00109761
		1256.85	0.00108423
		1257.5	0.00107092
		1258.15	0.00105769
		1258.8	0.00104458
		1259.45	0.00103162
		1260.1	0.00101885
		1260.75	0.00100628
		1261.4	0.000993951
		1262.05	0.000981875
		1262.7	0.000970076
		1263.35	0.000958572
		1264	0.000947379
		1264.65	0.000936486
		1265.3	0.000925956
		1265.95	0.000915771
		1266.6	0.000905938
		1267.25	0.000896461
		1267.9	0.000887343
		1268.55	0.000878586
		1269.2	0.000870187
		1269.85	0.000862143
		1270.5	0.00085445
		1271.15	0.000847102
		1271.8	0.000840089
		1272.45	0.000833403
		1273.1	0.000827033
		1273.75	0.000820967
		1274.4	0.000815191
		1275.05	0.000809693
		1275.7	0.000804457
		1276.35	0.000799467
		1277	0.000794708
		1277.65	0.000790162
		1278.3	0.000785813
		1278.95	0.000781644
		1279.6	0.000777636
		1280.25	0.000773772
		1280.9	0.000770036
		1281.55	0.000766408
		1282.2	0.000762872
		1282.85	0.00075941
		1283.5	0.000756006
		1284.15	0.000752644
		1284.8	0.000749306
		1285.45	0.000745977
		1286.1	0.000742642
		1286.75	0.000739287
		1287.4	0.000735897
		1288.05	0.00073246
		1288.7	0.000728961
		1289.35	0.00072539
		1290	0.000721734
		1290.65	0.000717983
		1291.3	0.000714126
		1291.95	0.000710155
		1292.6	0.000706061
		1293.25	0.000701836
		1293.9	0.000697472
		1294.55	0.000692964
		1295.2	0.000688305
		1295.85	0.000683491
		1296.5	0.000678516
		1297.15	0.000673379
		1297.8	0.000668074
		1298.45	0.000662574
		1299.1	0.000656933
		1299.75	0.00065112
		1300.4	0.000645136
		1301.05	0.000638979
		1301.7	0.000632651
		1302.35	0.000626154
		1303	0.000619519
		1303.65	0.000612694
		1304.3	0.000605706
		1304.95	0.000598535
		1305.6	0.000591238
		1306.25	0.000583792
		1306.9	0.0005762
		1307.55	0.00056847
		1308.2	0.000560605
		1308.85	0.000552613
		1309.5	0.000544499
		1310.15	0.000536271
		1310.8	0.000527936
		1311.45	0.000519501
		1312.1	0.000510974
		1312.75	0.000502363
		1313.4	0.000493675
		1314.05	0.00048492
		1314.7	0.000476107
		1315.35	0.000467243
		1316	0.000458338
		1316.65	0.000449402
		1317.3	0.000440443
		1317.95	0.000431444
		1318.6	0.000422473
		1319.25	0.000413507
		1319.9	0.000404557
		1320.55	0.000395633
		1321.2	0.000386744
		1321.85	0.000377902
		1322.5	0.000369115
		1323.15	0.000360396
		1323.8	0.000351753
		1324.45	0.000343197
		1325.1	0.00033474
		1325.75	0.000326391
		1326.4	0.000318161
		1327.05	0.000310062
		1327.7	0.000302103
		1328.35	0.000294296
		1329	0.000286653
		1329.65	0.000279183
		1330.3	0.000271898
		1330.95	0.00026481
		1331.6	0.00025793
		1332.25	0.000251269
		1332.9	0.000244839
		1333.55	0.000238651
		1334.2	0.000232717
		1334.85	0.00022705
		1335.5	0.00022166
		1336.15	0.00021656
		1336.8	0.000211761
		1337.45	0.000207275
		1338.1	0.000203116
		1338.75	0.000199293
		1339.4	0.000195819
		1340.05	0.000192706
		1340.7	0.000189966
		1341.35	0.000187609
		1342	0.000185648
		1342.65	0.000184092
		1343.3	0.000182953
		1343.95	0.00018224
		1344.6	0.000181964
		1345.25	0.000182134
		1345.9	0.000182758
		1346.55	0.000183844
		1347.2	0.0001854
		1347.85	0.000187432
		1348.5	0.000189945
		1349.15	0.000192945
		1349.8	0.000196433
		1350.45	0.000200413
		1351.1	0.000204886
		1351.75	0.000209851
		1352.4	0.000215306
		1353.05	0.000221281
		1353.7	0.000227711
		1354.35	0.000234618
		1355	0.000241993
		1355.65	0.000249826
		1356.3	0.000258135
		1356.95	0.000266852
		1357.6	0.000275987
		1358.25	0.000285522
		1358.9	0.000295439
		1359.55	0.000305715
		1360.2	0.000316327
		1360.85	0.000327252
		1361.5	0.00033846
		1362.15	0.000349925
		1362.8	0.000361614
		1363.45	0.000373497
		1364.1	0.000385539
		1364.75	0.000397704
		1365.4	0.000409958
		1366.05	0.000422261
		1366.7	0.000434575
		1367.35	0.000446861
		1368	0.000459078
		1368.65	0.000471186
		1369.3	0.000483143
		1369.95	0.00049491
		1370.6	0.000506475
		1371.25	0.000517741
		1371.9	0.000528696
		1372.55	0.000539329
		1373.2	0.000549549
		1373.85	0.000559344
		1374.5	0.00056868
		1375.15	0.000577524
		1375.8	0.000585845
		1376.45	0.000593614
		1377.1	0.000600805
		1377.75	0.000607395
		1378.4	0.000613363
		1379.05	0.000618692
		1379.7	0.000623366
		1380.35	0.000627404
		1381	0.000630742
		1381.65	0.000633404
		1382.3	0.000635388
		1382.95	0.000636698
		1383.6	0.00063734
		1384.25	0.000637325
		1384.9	0.000636668
		1385.55	0.000635385
		1386.2	0.0006335
		1386.85	0.000631036
		1387.5	0.000628023
		1388.15	0.000624492
		1388.8	0.000620477
		1389.45	0.000616019
		1390.1	0.000611156
		1390.75	0.000605932
		1391.4	0.000600425
		1392.05	0.000594626
		1392.7	0.000588612
		1393.35	0.000582434
		1394	0.000576146
		1394.65	0.000569831
		1395.3	0.000563489
		1395.95	0.000557204
		1396.6	0.00055106
		1397.25	0.00054506
		1397.9	0.000539286
		1398.55	0.000533795
		1399.2	0.000528641
		1399.85	0.00052388
		1400.5	0.000519564
		1401.15	0.000515745
		1401.8	0.000512474
		1402.45	0.000509799
		1403.1	0.000507767
		1403.75	0.000506395
		1404.4	0.000505781
		1405.05	0.000505935
		1405.7	0.000506894
		1406.35	0.000508693
		1407	0.000511361
		1407.65	0.000514929
		1408.3	0.000519452
		1408.95	0.000524895
		1409.6	0.000531307
		1410.25	0.000538702
		1410.9	0.000547096
		1411.55	0.000556499
		1412.2	0.000566919
		1412.85	0.000578363
		1413.5	0.000590833
		1414.15	0.000604329
		1414.8	0.000618823
		1415.45	0.000634366
		1416.1	0.000650923
		1416.75	0.000668484
		1417.4	0.00068704
		1418.05	0.000706579
		1418.7	0.000727087
		1419.35	0.000748549
		1420	0.000770948
		1420.65	0.000794268
		1421.3	0.000818519
		1421.95	0.000843626
		1422.6	0.000869595
		1423.25	0.000896405
		1423.9	0.000924036
		1424.55	0.000952464
		1425.2	0.000981698
		1425.85	0.00101169
		1426.5	0.00104238
		1427.15	0.00107379
		1427.8	0.00110588
		1428.45	0.00113864
		1429.1	0.00117202
		1429.75	0.00120601
		1430.4	0.00124058
		1431.05	0.00127571
		1431.7	0.00131137
		1432.35	0.00134752
		1433	0.00138413
		1433.65	0.00142118
		1434.3	0.00145864
		1434.95	0.00149646
		1435.6	0.00153461
		1436.25	0.00157305
		1436.9	0.00161174
		1437.55	0.00165064
		1438.2	0.0016897
		1438.85	0.00172888
		1439.5	0.00176813
		1440.15	0.00180739
		1440.8	0.00184662
		1441.45	0.00188575
		1442.1	0.00192474
		1442.75	0.00196352
		1443.4	0.00200203
		1444.05	0.00204021
		1444.7	0.002078
		1445.35	0.00211533
		1446	0.00215215
		1446.65	0.00218838
		1447.3	0.00222398
		1447.95	0.00225887
		1448.6	0.002293
		1449.25	0.00232631
		1449.9	0.00235875
		1450.55	0.00239027
		1451.2	0.00242083
		1451.85	0.00245038
		1452.5	0.00247888
		1453.15	0.00250632
		1453.8	0.00253265
		1454.45	0.00255788
		1455.1	0.00258198
		1455.75	0.00260496
		1456.4	0.00262682
		1457.05	0.00264757
		1457.7	0.00266725
		1458.35	0.00268587
		1459	0.00270348
		1459.65	0.00272012
		1460.3	0.00273585
		1460.95	0.00275073
		1461.6	0.00276483
		1462.25	0.00277824
		1462.9	0.00279103
		1463.55	0.00280327
		1464.2	0.0028151
		1464.85	0.00282661
		1465.5	0.00283788
		1466.15	0.00284903
		1466.8	0.00286017
		1467.45	0.0028714
		1468.1	0.00288284
		1468.75	0.00289458
		1469.4	0.00290674
		1470.05	0.00291941
		1470.7	0.00293269
		1471.35	0.00294668
		1472	0.00296145
		1472.65	0.00297709
		1473.3	0.00299367
		1473.95	0.00301125
		1474.6	0.00302987
		1475.25	0.00304957
		1475.9	0.0030704
		1476.55	0.00309235
		1477.2	0.00311545
		1477.85	0.00313967
		1478.5	0.00316501
		1479.15	0.00319143
		1479.8	0.00321889
		1480.45	0.00324733
		1481.1	0.00327668
		1481.75	0.00330686
		1482.4	0.00333779
		1483.05	0.00336935
		1483.7	0.00340145
		1484.35	0.00343396
		1485	0.00346675
		1485.65	0.00349969
		1486.3	0.00353263
		1486.95	0.00356544
		1487.6	0.00359798
		1488.25	0.00363006
		1488.9	0.00366154
		1489.55	0.00369227
		1490.2	0.0037221
		1490.85	0.00375086
		1491.5	0.00377842
		1492.15	0.00380463
		1492.8	0.00382934
		1493.45	0.00385242
		1494.1	0.00387374
		1494.75	0.00389318
		1495.4	0.00391064
		1496.05	0.00392601
		1496.7	0.00393919
		1497.35	0.0039501
		1498	0.00395868
		1498.65	0.00396487
		1499.3	0.0039686
		1499.95	0.00396985
		1500.6	0.00396859
		1501.25	0.00396481
		1501.9	0.0039585
		1502.55	0.00394967
		1503.2	0.00393833
		1503.85	0.00392452
		1504.5	0.00390827
		1505.15	0.00388964
		1505.8	0.00386867
		1506.45	0.00384543
		1507.1	0.00381999
		1507.75	0.00379243
		1508.4	0.00376284
		1509.05	0.0037313
		1509.7	0.0036979
		1510.35	0.00366275
		1511	0.00362594
		1511.65	0.00358758
		1512.3	0.00354777
		1512.95	0.00350662
		1513.6	0.00346422
		1514.25	0.00342069
		1514.9	0.00337613
		1515.55	0.00333064
		1516.2	0.00328433
		1516.85	0.00323728
		1517.5	0.0031896
		1518.15	0.00314138
		1518.8	0.00309269
		1519.45	0.00304365
		1520.1	0.00299433
		1520.75	0.0029448
		1521.4	0.00289514
		1522.05	0.00284542
		1522.7	0.00279569
		1523.35	0.00274603
		1524	0.00269649
		1524.65	0.00264712
		1525.3	0.00259797
		1525.95	0.0025491
		1526.6	0.00250053
		1527.25	0.00245228
		1527.9	0.00240446
		1528.55	0.00235704
		1529.2	0.00231007
		1529.85	0.00226357
		1530.5	0.00221757
		1531.15	0.00217208
		1531.8	0.00212712
		1532.45	0.00208271
		1533.1	0.00203887
		1533.75	0.00199561
		1534.4	0.00195294
		1535.05	0.00191087
		1535.7	0.00186941
		1536.35	0.00182857
		1537	0.00178836
		1537.65	0.00174878
		1538.3	0.00170983
		1538.95	0.00167153
		1539.6	0.00163387
		1540.25	0.00159686
		1540.9	0.0015605
		1541.55	0.0015248
		1542.2	0.00148975
		1542.85	0.00145537
		1543.5	0.00142165
		1544.15	0.00138859
		1544.8	0.0013562
		1545.45	0.00132447
		1546.1	0.00129341
		1546.75	0.00126302
		1547.4	0.0012333
		1548.05	0.00120424
		1548.7	0.00117586
		1549.35	0.00114814
		1550	0.0011211
		1550.65	0.00109472
		1551.3	0.00106898
		1551.95	0.00104394
		1552.6	0.00101956
		1553.25	0.000995844
		1553.9	0.000972791
		1554.55	0.000950397
		1555.2	0.00092866
		1555.85	0.00090755
		1556.5	0.000887119
		1557.15	0.000867334
		1557.8	0.000848191
		1558.45	0.000829686
		1559.1	0.000811842
		1559.75	0.000794601
		1560.4	0.000777983
		1561.05	0.000761981
		1561.7	0.000746589
		1562.35	0.0007318
		1563	0.000717606
		1563.65	0.000704
		1564.3	0.000690974
		1564.95	0.000678519
		1565.6	0.000666598
		1566.25	0.000655262
		1566.9	0.000644467
		1567.55	0.000634203
		1568.2	0.000624461
		1568.85	0.000615228
		1569.5	0.000606493
		1570.15	0.000598246
		1570.8	0.000590473
		1571.45	0.000583162
		1572.1	0.000576301
		1572.75	0.000569876
		1573.4	0.000563875
		1574.05	0.000558284
		1574.7	0.000553089
		1575.35	0.000548277
		1576	0.000543833
		1576.65	0.000539744
		1577.3	0.000535996
		1577.95	0.00053255
		1578.6	0.000529444
		1579.25	0.000526637
		1579.9	0.000524113
		1580.55	0.00052186
		1581.2	0.000519864
		1581.85	0.000518111
		1582.5	0.000516589
		1583.15	0.000515285
		1583.8	0.000514187
		1584.45	0.000513282
		1585.1	0.000512559
		1585.75	0.000512007
		1586.4	0.000511615
		1587.05	0.000511374
		1587.7	0.000511249
		1588.35	0.000511284
		1589	0.000511444
		1589.65	0.000511721
		1590.3	0.000512108
		1590.95	0.000512599
		1591.6	0.00051319
		1592.25	0.000513875
		1592.9	0.000514627
		1593.55	0.000515496
		1594.2	0.000516453
		1594.85	0.000517495
		1595.5	0.000518623
		1596.15	0.000519837
		1596.8	0.000521139
		1597.45	0.00052253
		1598.1	0.000524014
		1598.75	0.000525593
		1599.4	0.000527272
		1600.05	0.000529055
		1600.7	0.000530948
		1601.35	0.000532955
		1602	0.000535084
		1602.65	0.000537311
		1603.3	0.000539703
		1603.95	0.000542234
		1604.6	0.00054491
		1605.25	0.000547739
		1605.9	0.000550726
		1606.55	0.000553878
		1607.2	0.000557174
		1607.85	0.000560673
		1608.5	0.000564352
		1609.15	0.000568213
		1609.8	0.00057226
		1610.45	0.000576495
		1611.1	0.000580918
		1611.75	0.00058553
		1612.4	0.000590329
		1613.05	0.000595312
		1613.7	0.000600476
		1614.35	0.000605814
		1615	0.000611321
		1615.65	0.000616987
		1616.3	0.000622802
		1616.95	0.000628754
		1617.6	0.00063483
		1618.25	0.000641015
		1618.9	0.000647291
		1619.55	0.000653641
		1620.2	0.000660044
		1620.85	0.000666478
		1621.5	0.000672921
		1622.15	0.000679349
		1622.8	0.000685734
		1623.45	0.000692051
		1624.1	0.000698271
		1624.75	0.000704365
		1625.4	0.000710304
		1626.05	0.000716056
		1626.7	0.00072159
		1627.35	0.000726876
		1628	0.000731881
		1628.65	0.000736575
		1629.3	0.000740925
		1629.95	0.000744902
		1630.6	0.000748475
		1631.25	0.000751614
		1631.9	0.000754291
		1632.55	0.000756479
		1633.2	0.000758153
		1633.85	0.000759287
		1634.5	0.00075986
		1635.15	0.00075985
		1635.8	0.00075924
		1636.45	0.000758013
		1637.1	0.000756155
		1637.75	0.000753655
		1638.4	0.000750503
		1639.05	0.000746693
		1639.7	0.000742221
		1640.35	0.000737086
		1641	0.000731289
		1641.65	0.000724836
		1642.3	0.000717708
		1642.95	0.000709968
		1643.6	0.0007016
		1644.25	0.000692619
		1644.9	0.000683042
		1645.55	0.000672891
		1646.2	0.000662218
		1646.85	0.00065099
		1647.5	0.00063926
		1648.15	0.000627058
		1648.8	0.000614412
		1649.45	0.000601355
		1650.1	0.000587918
		1650.75	0.000574138
		1651.4	0.000560047
		1652.05	0.000545683
		1652.7	0.000531081
		1653.35	0.000516279
		1654	0.000501313
		1654.65	0.00048622
		1655.3	0.000471038
		1655.95	0.000455777
		1656.6	0.000440526
		1657.25	0.000425294
		1657.9	0.000410114
		1658.55	0.00039502
		1659.2	0.000380046
		1659.85	0.000365196
		1660.5	0.000350554
		1661.15	0.000336122
		1661.8	0.000321927
		1662.45	0.000307994
		1663.1	0.000294348
		1663.75	0.000281012
		1664.4	0.000268008
		1665.05	0.000255355
		1665.7	0.000243071
		1666.35	0.000231174
		1667	0.000219678
		1667.65	0.000208598
		1668.3	0.000197946
		1668.95	0.000187732
		1669.6	0.000177968
		1670.25	0.000168661
		1670.9	0.00015982
		1671.55	0.00015145
		1672.2	0.000143559
		1672.85	0.00013615
		1673.5	0.000129229
		1674.15	0.000122798
		1674.8	0.000116861
		1675.45	0.00011142
		1676.1	0.000106478
		1676.75	0.000102037
		1677.4	9.80981e-05
		1678.05	9.46637e-05
		1678.7	9.17352e-05
		1679.35	8.9314e-05
		1680	8.74019e-05
		1680.65	8.60005e-05
		1681.3	8.51114e-05
		1681.95	8.47365e-05
		1682.6	8.48777e-05
		1683.25	8.55368e-05
		1683.9	8.67158e-05
		1684.55	8.84168e-05
		1685.2	9.06417e-05
		1685.85	9.33924e-05
		1686.5	9.66705e-05
		1687.15	0.000100478
		1687.8	0.000104815
		1688.45	0.000109682
		1689.1	0.000115081
		1689.75	0.00012101
		1690.4	0.000127469
		1691.05	0.000134455
		1691.7	0.000141964
		1692.35	0.000149994
		1693	0.000158538
		1693.65	0.000167589
		1694.3	0.000177139
		1694.95	0.000187179
		1695.6	0.000197696
		1696.25	0.000208676
		1696.9	0.000220105
		1697.55	0.000231964
		1698.2	0.000244234
		1698.85	0.000256892
		1699.5	0.000269916
		1700.15	0.000283278
		1700.8	0.000296949
		1701.45	0.0003109
		1702.1	0.000325097
		1702.75	0.000339504
		1703.4	0.000354084
		1704.05	0.000368798
		1704.7	0.000383604
		1705.35	0.000398459
		1706	0.000413319
		1706.65	0.000428138
		1707.3	0.000442867
		1707.95	0.000457458
		1708.6	0.000471863
		1709.25	0.00048603
		1709.9	0.000499911
		1710.55	0.000513454
		1711.2	0.000526609
		1711.85	0.000539327
		1712.5	0.000551559
		1713.15	0.000563232
		1713.8	0.000574354
		1714.45	0.00058485
		1715.1	0.000594679
		1715.75	0.0006038
		1716.4	0.000612176
		1717.05	0.00061977
		1717.7	0.000626552
		1718.35	0.000632491
		1719	0.000637563
		1719.65	0.000641746
		1720.3	0.00064502
		1720.95	0.000647373
		1721.6	0.00064877
		1722.25	0.000649256
		1722.9	0.0006488
		1723.55	0.000647406
		1724.2	0.000645078
		1724.85	0.000641828
		1725.5	0.000637668
		1726.15	0.000632617
		1726.8	0.000626696
		1727.45	0.000619932
		1728.1	0.000612351
		1728.75	0.000603987
		1729.4	0.000594874
		1730.05	0.000585049
		1730.7	0.000574552
		1731.35	0.000563426
		1732	0.000551715
		1732.65	0.000539465
		1733.3	0.000526722
		1733.95	0.000513535
		1734.6	0.000499952
		1735.25	0.000486023
		1735.9	0.000471798
		1736.55	0.000457325
		1737.2	0.000442654
		1737.85	0.000427832
		1738.5	0.000412908
		1739.15	0.000397927
		1739.8	0.000382933
		1740.45	0.000367971
		1741.1	0.00035308
		1741.75	0.000338301
		1742.4	0.000323672
		1743.05	0.000309226
		1743.7	0.000295025
		1744.35	0.000281048
		1745	0.000267347
		1745.65	0.000253948
		1746.3	0.000240873
		1746.95	0.000228143
		1747.6	0.000215776
		1748.25	0.000203788
		1748.9	0.000192192
		1749.55	0.000180999
		1750.2	0.000170218
		1750.85	0.000159855
		1751.5	0.000149915
		1752.15	0.000140401
		1752.8	0.000131313
		1753.45	0.00012265
		1754.1	0.000114411
		1754.75	0.000106592
		1755.4	9.91874e-05
		1756.05	9.21919e-05
		1756.7	8.55984e-05
		1757.35	7.93993e-05
		1758	7.35864e-05
		1758.65	6.81507e-05
		1759.3	6.30833e-05
		1759.95	5.83748e-05
		1760.6	5.40159e-05
		1761.25	4.9997e-05
		1761.9	4.63093e-05
		1762.55	4.29437e-05
		1763.2	3.98918e-05
		1763.85	3.71457e-05
		1764.5	3.4698e-05
		1765.15	3.25422e-05
		1765.8	3.06723e-05
		1766.45	2.90835e-05
		1767.1	2.77717e-05
		1767.75	2.67337e-05
		1768.4	2.59675e-05
		1769.05	2.54723e-05
		1769.7	2.5248e-05
		1770.35	2.52961e-05
		1771	2.56188e-05
		1771.65	2.62198e-05
		1772.3	2.71037e-05
		1772.95	2.82764e-05
		1773.6	2.97448e-05
		1774.25	3.15169e-05
		1774.9	3.36015e-05
		1775.55	3.60087e-05
		1776.2	3.87493e-05
		1776.85	4.18347e-05
		1777.5	4.52774e-05
		1778.15	4.90901e-05
		1778.8	5.32862e-05
		1779.45	5.78793e-05
		1780.1	6.28832e-05
		1780.75	6.83119e-05
		1781.4	7.41791e-05
		1782.05	8.04982e-05
		1782.7	8.72821e-05
		1783.35	9.45431e-05
		1784	0.000102293
		1784.65	0.000110541
		1785.3	0.000119297
		1785.95	0.000128568
		1786.6	0.000138361
		1787.25	0.000148678
		1787.9	0.000159521
		1788.55	0.000170922
		1789.2	0.000182818
		1789.85	0.000195232
		1790.5	0.000208155
		1791.15	0.000221574
		1791.8	0.000235475
		1792.45	0.00024984
		1793.1	0.000264646
		1793.75	0.000279869
		1794.4	0.00029548
		1795.05	0.000311447
		1795.7	0.000327733
		1796.35	0.000344301
		1797	0.000361107
		1797.65	0.000378106
		1798.3	0.000395249
		1798.95	0.000412456
		1799.6	0.000429732
		1800.25	0.000446987
		1800.9	0.000464163
		1801.55	0.000481198
		1802.2	0.00049803
		1802.85	0.000514596
		1803.5	0.000530831
		1804.15	0.00054667
		1804.8	0.000562049
		1805.45	0.000576903
		1806.1	0.00059117
		1806.75	0.000604788
		1807.4	0.000617698
		1808.05	0.000629841
		1808.7	0.000641164
		1809.35	0.000651615
		1810	0.000661147
		1810.65	0.000669717
		1811.3	0.000677285
		1811.95	0.000683817
		1812.6	0.000689284
		1813.25	0.000693662
		1813.9	0.000696932
		1814.55	0.000699083
		1815.2	0.000700107
		1815.85	0.000700003
		1816.5	0.000698776
		1817.15	0.000696437
		1817.8	0.000693004
		1818.45	0.000688499
		1819.1	0.000682949
		1819.75	0.000676389
		1820.4	0.000668857
		1821.05	0.000660398
		1821.7	0.000651058
		1822.35	0.000640891
		1823	0.000629953
		1823.65	0.000618302
		1824.3	0.000606003
		1824.95	0.000593119
		1825.6	0.000579718
		1826.25	0.000565869
		1826.9	0.000551642
		1827.55	0.000537107
		1828.2	0.000522335
		1828.85	0.000507397
		1829.5	0.000492363
		1830.15	0.000477301
		1830.8	0.00046228
		1831.45	0.000447365
		1832.1	0.000432619
		1832.75	0.000418104
		1833.4	0.000403879
		1834.05	0.000389997
		1834.7	0.000376513
		1835.35	0.000363474
		1836	0.000350927
		1836.65	0.000338912
		1837.3	0.000327468
		1837.95	0.000316628
		1838.6	0.000306424
		1839.25	0.000296881
		1839.9	0.000288023
		1840.55	0.000279868
		1841.2	0.000272432
		1841.85	0.000265726
		1842.5	0.000259759
		1843.15	0.000254535
		1843.8	0.000250056
		1844.45	0.000246321
		1845.1	0.000243325
		1845.75	0.000241062
		1846.4	0.00023952
		1847.05	0.00023869
		1847.7	0.000238555
		1848.35	0.000239099
		1849	0.000240304
		1849.65	0.000242149
		1850.3	0.000244614
		1850.95	0.000247673
		1851.6	0.000251303
		1852.25	0.000255477
		1852.9	0.000260169
		1853.55	0.00026535
		1854.2	0.000270993
		1854.85	0.000277066
		1855.5	0.00028354
		1856.15	0.000290385
		1856.8	0.000297569
		1857.45	0.000305061
		1858.1	0.000312829
		1858.75	0.000320841
		1859.4	0.000329065
		1860.05	0.00033747
		1860.7	0.000346022
		1861.35	0.000354691
		1862	0.000363444
		1862.65	0.000372249
		1863.3	0.000381076
		1863.95	0.000389893
		1864.6	0.00039867
		1865.25	0.000407376
		1865.9	0.000415982
		1866.55	0.000424459
		1867.2	0.000432778
		1867.85	0.000440912
		1868.5	0.000448833
		1869.15	0.000456515
		1869.8	0.000463933
		1870.45	0.000471063
		1871.1	0.000477881
		1871.75	0.000484365
		1872.4	0.000490493
		1873.05	0.000496246
		1873.7	0.000501605
		1874.35	0.000506552
		1875	0.000511071
		1875.65	0.000515147
		1876.3	0.000518766
		1876.95	0.000521918
		1877.6	0.00052459
		1878.25	0.000526775
		1878.9	0.000528465
		1879.55	0.000529654
		1880.2	0.000530337
		1880.85	0.000530512
		1881.5	0.000530178
		1882.15	0.000529335
		1882.8	0.000527985
		1883.45	0.000526131
		1884.1	0.000523779
		1884.75	0.000520934
		1885.4	0.000517606
		1886.05	0.000513802
		1886.7	0.000509534
		1887.35	0.000504789
		1888	0.000499634
		1888.65	0.000494052
		1889.3	0.000488061
		1889.95	0.000481675
		1890.6	0.000474914
		1891.25	0.000467794
		1891.9	0.000460336
		1892.55	0.000452558
		1893.2	0.000444481
		1893.85	0.000436126
		1894.5	0.000427514
		1895.15	0.000418667
		1895.8	0.000409607
		1896.45	0.000400355
		1897.1	0.000390933
		1897.75	0.000381364
		1898.4	0.000371669
		1899.05	0.00036187
		1899.7	0.000351989
		1900.35	0.000342046
		1901	0.000332063
		1901.65	0.00032206
		1902.3	0.000312055
		1902.95	0.000302069
		1903.6	0.00029212
		1904.25	0.000282225
		1904.9	0.000272401
		1905.55	0.000262697
		1906.2	0.000253069
		1906.85	0.000243559
		1907.5	0.000234181
		1908.15	0.000224948
		1908.8	0.000215871
		1909.45	0.000206963
		1910.1	0.000198232
		1910.75	0.000189689
		1911.4	0.000181341
		1912.05	0.000173196
		1912.7	0.000165261
		1913.35	0.000157541
		1914	0.000150042
		1914.65	0.000142767
		1915.3	0.000135719
		1915.95	0.000128902
		1916.6	0.000122318
		1917.25	0.000115967
		1917.9	0.000109849
		1918.55	0.000103966
		1919.2	9.83159e-05
		1919.85	9.28981e-05
		1920.5	8.7711e-05
		1921.15	8.27525e-05
		1921.8	7.80203e-05
		1922.45	7.35115e-05
		1923.1	6.92232e-05
		1923.75	6.51521e-05
		1924.4	6.12947e-05
		1925.05	5.76473e-05
		1925.7	5.42061e-05
		1926.35	5.09673e-05
		1927	4.7927e-05
		1927.65	4.51158e-05
		1928.3	4.24742e-05
		1928.95	4.00245e-05
		1929.6	3.77646e-05
		1930.25	3.56932e-05
		1930.9	3.38098e-05
		1931.55	3.21148e-05
		1932.2	3.06101e-05
		1932.85	2.92991e-05
		1933.5	2.81869e-05
		1934.15	2.72811e-05
		1934.8	2.65919e-05
		1935.45	2.61328e-05
		1936.1	2.59211e-05
		1936.75	2.59786e-05
		1937.4	2.6332e-05
		1938.05	2.70143e-05
		1938.7	2.8065e-05
		1939.35	2.95315e-05
		1940	3.14698e-05
		1940.65	3.3945e-05
		1941.3	3.70331e-05
		1941.95	4.08208e-05
		1942.6	4.54071e-05
		1943.25	5.09031e-05
		1943.9	5.74327e-05
		1944.55	6.51323e-05
		1945.2	7.41509e-05
		1945.85	8.46486e-05
		1946.5	9.6796e-05
		1947.15	0.000110772
		1947.8	0.000126761
		1948.45	0.000144949
		1949.1	0.000165524
		1949.75	0.000188666
		1950.4	0.000214543
		1951.05	0.000243343
		1951.7	0.000275137
		1952.35	0.000310056
		1953	0.000348165
		1953.65	0.000389489
		1954.3	0.000434005
		1954.95	0.000481635
		1955.6	0.000532243
		1956.25	0.00058563
		1956.9	0.000641531
		1957.55	0.000699617
		1958.2	0.000759491
		1958.85	0.000820694
		1959.5	0.000882737
		1960.15	0.000945003
		1960.8	0.0010069
		1961.45	0.00106782
		1962.1	0.00112705
		1962.75	0.00118393
		1963.4	0.0012378
		1964.05	0.00128802
		1964.7	0.00133399
		1965.35	0.00137516
		1966	0.00141104
		1966.65	0.00144123
		1967.3	0.00146541
		1967.95	0.00148336
		1968.6	0.00149496
		1969.25	0.00150021
		1969.9	0.00149924
		1970.55	0.0014922
		1971.2	0.00147942
		1971.85	0.00146131
		1972.5	0.00143835
		1973.15	0.0014111
		1973.8	0.00138016
		1974.45	0.00134623
		1975.1	0.00131
		1975.75	0.00127217
		1976.4	0.00123346
		1977.05	0.00119457
		1977.7	0.00115619
		1978.35	0.00111896
		1979	0.0010835
		1979.65	0.00105037
		1980.3	0.00102006
		1980.95	0.000993032
		1981.6	0.000969667
		1982.25	0.000950295
		1982.9	0.000935186
		1983.55	0.000924555
		1984.2	0.000918565
		1984.85	0.000917332
		1985.5	0.000920925
		1986.15	0.000929377
		1986.8	0.000942684
		1987.45	0.000960812
		1988.1	0.0009837
		1988.75	0.00101126
		1989.4	0.00104339
		1990.05	0.00107995
		1990.7	0.00112081
		1991.35	0.00116579
		1992	0.00121471
		1992.65	0.00126737
		1993.3	0.00132354
		1993.95	0.00138298
		1994.6	0.00144544
		1995.25	0.00151061
		1995.9	0.00157819
		1996.55	0.00164786
		1997.2	0.00171926
		1997.85	0.00179202
		1998.5	0.00186573
		1999.15	0.00194
		1999.8	0.00201439
		2000.45	0.00208847
		2001.1	0.00216179
		2001.75	0.0022339
		2002.4	0.00230436
		2003.05	0.00237271
		2003.7	0.00243852
		2004.35	0.00250138
		2005	0.0025609
		2005.65	0.00261669
		2006.3	0.00266842
		2006.95	0.00271579
		2007.6	0.00275852
		2008.25	0.00279638
		2008.9	0.0028292
		2009.55	0.0028568
		2010.2	0.00287915
		2010.85	0.00289616
		2011.5	0.00290783
		2012.15	0.00291421
		2012.8	0.00291536
		2013.45	0.00291142
		2014.1	0.00290253
		2014.75	0.00288889
		2015.4	0.0028707
		2016.05	0.00284822
		2016.7	0.0028217
		2017.35	0.00279141
		2018	0.00275765
		2018.65	0.00272071
		2019.3	0.0026809
		2019.95	0.00263851
		2020.6	0.00259384
		2021.25	0.00254717
		2021.9	0.00249881
		2022.55	0.00244901
		2023.2	0.00239804
		2023.85	0.00234614
		2024.5	0.00229355
		2025.15	0.00224049
		2025.8	0.00218715
		2026.45	0.00213373
		2027.1	0.0020804
		2027.75	0.0020273
		2028.4	0.00197458
		2029.05	0.00192236
		2029.7	0.00187076
		2030.35	0.00181987
		2031	0.00176979
		2031.65	0.00172057
		2032.3	0.00167229
		2032.95	0.00162499
		2033.6	0.00157872
		2034.25	0.0015335
		2034.9	0.00148937
		2035.55	0.00144636
		2036.2	0.00140443
		2036.85	0.00136359
		2037.5	0.00132385
		2038.15	0.00128519
		2038.8	0.00124759
		2039.45	0.00121103
		2040.1	0.00117547
		2040.75	0.00114089
		2041.4	0.00110726
		2042.05	0.00107452
		2042.7	0.00104265
		2043.35	0.00101161
		2044	0.000981345
		2044.65	0.000951825
		2045.3	0.000923006
		2045.95	0.000894849
		2046.6	0.000867319
		2047.25	0.000840379
		2047.9	0.000813999
		2048.55	0.000788149
		2049.2	0.000762804
		2049.85	0.000737943
		2050.5	0.00071355
		2051.15	0.00068961
		2051.8	0.000666117
		2052.45	0.000643066
		2053.1	0.000620457
		2053.75	0.000598296
		2054.4	0.000576593
		2055.05	0.00055536
		2055.7	0.000534616
		2056.35	0.000514383
		2057	0.000494661
		2057.65	0.000475532
		2058.3	0.000456996
		2058.95	0.000439089
		2059.6	0.000421845
		2060.25	0.000405303
		2060.9	0.000389504
		2061.55	0.000374488
		2062.2	0.000360298
		2062.85	0.000346975
		2063.5	0.000334562
		2064.15	0.000323101
		2064.8	0.000312634
		2065.45	0.0003032
		2066.1	0.00029484
		2066.75	0.000287591
		2067.4	0.000281486
		2068.05	0.00027656
		2068.7	0.000272842
		2069.35	0.000270357
		2070	0.000269129
		2070.65	0.000269176
		2071.3	0.000270512
		2071.95	0.000273147
		2072.6	0.000277083
		2073.25	0.000282319
		2073.9	0.000288848
		2074.55	0.000296656
		2075.2	0.000305721
		2075.85	0.000316017
		2076.5	0.000327509
		2077.15	0.000340155
		2077.8	0.000353907
		2078.45	0.000368706
		2079.1	0.000384462
		2079.75	0.000401162
		2080.4	0.000418668
		2081.05	0.000436952
		2081.7	0.000455887
		2082.35	0.000475374
		2083	0.000495309
		2083.65	0.000515578
		2084.3	0.000536043
		2084.95	0.000556634
		2085.6	0.0005772
		2086.25	0.000597614
		2086.9	0.000617749
		2087.55	0.000637474
		2088.2	0.000656661
		2088.85	0.000675184
		2089.5	0.000692916
		2090.15	0.000709737
		2090.8	0.000725529
		2091.45	0.000740181
		2092.1	0.000753588
		2092.75	0.000765653
		2093.4	0.000776287
		2094.05	0.000785411
		2094.7	0.000792956
		2095.35	0.000798863
		2096	0.000803085
		2096.65	0.000805587
		2097.3	0.000806345
		2097.95	0.000805348
		2098.6	0.000802598
		2099.25	0.000798107
		2099.9	0.000791902
		2100.55	0.00078402
		2101.2	0.000774508
		2101.85	0.000763426
		2102.5	0.000750843
		2103.15	0.000736837
		2103.8	0.000721493
		2104.45	0.000704907
		2105.1	0.000687177
		2105.75	0.00066841
		2106.4	0.000648715
		2107.05	0.000628204
		2107.7	0.000606993
		2108.35	0.000585197
		2109	0.000562931
		2109.65	0.000540311
		2110.3	0.000517448
		2110.95	0.000494452
		2111.6	0.000471429
		2112.25	0.00044848
		2112.9	0.000425699
		2113.55	0.000403179
		2114.2	0.000381001
		2114.85	0.000359217
		2115.5	0.000337953
		2116.15	0.000317241
		2116.8	0.000297136
		2117.45	0.000277687
		2118.1	0.000258933
		2118.75	0.00024091
		2119.4	0.000223642
		2120.05	0.000207151
		2120.7	0.000191449
		2121.35	0.000176544
		2122	0.000162437
		2122.65	0.000149125
		2123.3	0.0001366
		2123.95	0.000124848
		2124.6	0.000113854
		2125.25	0.000103597
		2125.9	9.40547e-05
		2126.55	8.52013e-05
		2127.2	7.70097e-05
		2127.85	6.94509e-05
		2128.5	6.24948e-05
		2129.15	5.61103e-05
		2129.8	5.02661e-05
		2130.45	4.49304e-05
		2131.1	4.00718e-05
		2131.75	3.56592e-05
		2132.4	3.16619e-05
		2133.05	2.80502e-05
		2133.7	2.47952e-05
		2134.35	2.18692e-05
		2135	1.92456e-05
		2135.65	1.68991e-05
		2136.3	1.48057e-05
		2136.95	1.29428e-05
		2137.6	1.12891e-05
		2138.25	9.82482e-06
		2138.9	8.53145e-06
		2139.55	7.39188e-06
		2140.2	6.39028e-06
		2140.85	5.51211e-06
		2141.5	4.74405e-06
		2142.15	4.07394e-06
		2142.8	3.4907e-06
		2143.45	2.98431e-06
		2144.1	2.54571e-06
		2144.75	2.16674e-06
		2145.4	1.84009e-06
		2146.05	1.55921e-06
		2146.7	1.31826e-06
		2147.35	1.11207e-06
		2148	9.36046e-07
		2148.65	7.86131e-07
		2149.3	6.58759e-07
		2149.95	5.50796e-07
		2150.6	4.59503e-07
		2151.25	3.8249e-07
		2151.9	3.17676e-07
		2152.55	2.63258e-07
		2153.2	2.17677e-07
		2153.85	1.79588e-07
		2154.5	1.47834e-07
		2155.15	1.21424e-07
		2155.8	9.95106e-08
		2156.45	8.13705e-08
		2157.1	6.63892e-08
		2157.75	5.40458e-08
		2158.4	4.38994e-08
		2159.05	3.55787e-08
		2159.7	2.87709e-08
		2160.35	0
		2161	0
		2161.65	0
		2162.3	0
		2162.95	0
		2163.6	0
		2164.25	0
		2164.9	0
		2165.55	0
		2166.2	0
		2166.85	0
		2167.5	0
		2168.15	0
		2168.8	0
		2169.45	0
		2170.1	0
		2170.75	0
		2171.4	0
		2172.05	0
		2172.7	0
		2173.35	0
		2174	0
		2174.65	0
		2175.3	0
		2175.95	0
		2176.6	0
		2177.25	0
		2177.9	0
		2178.55	0
		2179.2	0
		2179.85	0
		2180.5	0
		2181.15	0
		2181.8	0
		2182.45	0
		2183.1	0
		2183.75	0
		2184.4	0
		2185.05	0
		2185.7	0
		2186.35	0
		2187	0
		2187.65	0
		2188.3	0
		2188.95	0
		2189.6	0
		2190.25	0
		2190.9	0
		2191.55	0
		2192.2	0
		2192.85	0
		2193.5	0
		2194.15	0
		2194.8	0
		2195.45	0
		2196.1	0
		2196.75	0
		2197.4	0
		2198.05	0
		2198.7	0
		2199.35	0
[truncated: 1 more rows]

## Sheet: PlotDat4
Source sheet	data	310	5.02321e-06
Plot name	ProbDens4	310.055	5.13719e-06
Plot Type	16	310.11	5.25369e-06
1st free col	5	310.165	5.37276e-06
Sigma Level	2	310.22	5.49447e-06
Absolute Errs	TRUE	310.275	5.63897e-06
Symbol Type	5	310.33	5.78659e-06
Inverse Plot	FALSE	310.385	5.91783e-06
Color Plot	FALSE	310.44	6.05197e-06
3D plot	FALSE	310.495	6.18908e-06
Linear	FALSE	310.55	6.3292e-06
Data Range	AD207:AE257	310.605	6.47242e-06
Filled Symbols	TRUE	310.66	6.61879e-06
ConcAge	FALSE	310.715	6.7881e-06
ConcSwap	FALSE	310.77	6.94155e-06
1st Symbol-row	1	310.825	7.09837e-06
		310.88	7.25863e-06
		310.935	7.42241e-06
		310.99	7.58977e-06
		311.045	7.7608e-06
		311.1	7.93556e-06
		311.155	8.11414e-06
		311.21	8.29661e-06
		311.265	8.48306e-06
		311.32	8.67356e-06
		311.375	8.86821e-06
		311.43	9.06708e-06
		311.485	9.27026e-06
		311.54	9.47784e-06
		311.595	9.68992e-06
		311.65	9.90657e-06
		311.705	1.0148e-05
		311.76	1.03746e-05
		311.815	1.06061e-05
		311.87	1.08426e-05
		311.925	1.10842e-05
		311.98	1.13309e-05
		312.035	1.15829e-05
		312.09	1.18403e-05
		312.145	1.21033e-05
		312.2	1.23718e-05
		312.255	1.2646e-05
		312.31	1.29261e-05
		312.365	1.32122e-05
		312.42	1.35243e-05
		312.475	1.38231e-05
		312.53	1.41283e-05
		312.585	1.444e-05
		312.64	1.47582e-05
		312.695	1.51031e-05
		312.75	1.54353e-05
		312.805	1.5795e-05
		312.86	1.61423e-05
		312.915	1.64969e-05
		312.97	1.68589e-05
		313.025	1.72285e-05
		313.08	1.76059e-05
		313.135	1.79912e-05
		313.19	1.83845e-05
		313.245	1.8786e-05
		313.3	1.91959e-05
		313.355	1.96143e-05
		313.41	2.00413e-05
		313.465	2.04773e-05
		313.52	2.09222e-05
		313.575	2.13763e-05
		313.63	2.18398e-05
		313.685	2.23129e-05
		313.74	2.27957e-05
		313.795	2.32884e-05
		313.85	2.37912e-05
		313.905	2.43042e-05
		313.96	2.48278e-05
		314.015	2.5362e-05
		314.07	2.59072e-05
		314.125	2.64634e-05
		314.18	2.70309e-05
		314.235	2.76296e-05
		314.29	2.82209e-05
		314.345	2.88444e-05
		314.4	2.94605e-05
		314.455	3.00891e-05
		314.51	3.07702e-05
		314.565	3.14454e-05
		314.62	3.21143e-05
		314.675	3.27965e-05
		314.73	3.34923e-05
		314.785	3.4202e-05
		314.84	3.49259e-05
		314.895	3.56642e-05
		314.95	3.64171e-05
		315.005	3.71849e-05
		315.06	3.7968e-05
		315.115	3.87664e-05
		315.17	3.95806e-05
		315.225	4.04109e-05
		315.28	4.12574e-05
		315.335	4.21205e-05
		315.39	4.30005e-05
		315.445	4.38976e-05
		315.5	4.48123e-05
		315.555	4.57447e-05
		315.61	4.67151e-05
		315.665	4.77048e-05
		315.72	4.86939e-05
		315.775	4.97022e-05
		315.83	5.07496e-05
		315.885	5.17976e-05
		315.94	5.28657e-05
		315.995	5.39543e-05
		316.05	5.50637e-05
		316.105	5.61943e-05
		316.16	5.73465e-05
		316.215	5.85404e-05
		316.27	5.97374e-05
		316.325	6.09572e-05
		316.38	6.22199e-05
		316.435	6.34868e-05
		316.49	6.47777e-05
		316.545	6.60928e-05
		316.6	6.74326e-05
		316.655	6.87975e-05
		316.71	7.02082e-05
		316.765	7.16253e-05
		316.82	7.30688e-05
		316.875	7.45391e-05
		316.93	7.60566e-05
		316.985	7.76027e-05
		317.04	7.91575e-05
		317.095	8.07411e-05
		317.15	8.23538e-05
		317.205	8.39962e-05
		317.26	8.56686e-05
		317.315	8.73717e-05
		317.37	8.91058e-05
		317.425	9.08716e-05
		317.48	9.26694e-05
		317.535	9.44998e-05
		317.59	9.63634e-05
		317.645	9.82606e-05
		317.7	0.000100192
		317.755	0.000102158
		317.81	0.00010416
		317.865	0.000106197
		317.92	0.000108271
		317.975	0.000110381
		318.03	0.000112529
		318.085	0.000114716
		318.14	0.000116941
		318.195	0.000119205
		318.25	0.000121509
		318.305	0.000123854
		318.36	0.00012624
		318.415	0.000128668
		318.47	0.000131138
		318.525	0.000133651
		318.58	0.000136208
		318.635	0.000138809
		318.69	0.000141455
		318.745	0.000144147
		318.8	0.000146886
		318.855	0.000149671
		318.91	0.000152505
		318.965	0.000155406
		319.02	0.000158338
		319.075	0.00016132
		319.13	0.000164352
		319.185	0.000167436
		319.24	0.000170572
		319.295	0.000173761
		319.35	0.000177003
		319.405	0.0001803
		319.46	0.000183653
		319.515	0.000187061
		319.57	0.000190527
		319.625	0.00019405
		319.68	0.000197631
		319.735	0.000201272
		319.79	0.000204973
		319.845	0.000208755
		319.9	0.00021262
		319.955	0.000216509
		320.01	0.000220461
		320.065	0.000224478
		320.12	0.00022858
		320.175	0.000232729
		320.23	0.000236946
		320.285	0.000241231
		320.34	0.000245585
		320.395	0.000250009
		320.45	0.000254524
		320.505	0.000259092
		320.56	0.000263733
		320.615	0.000268448
		320.67	0.000273238
		320.725	0.000278104
		320.78	0.000283066
		320.835	0.000288088
		320.89	0.000293189
		320.945	0.000298369
		321	0.000303631
		321.055	0.000308975
		321.11	0.000314423
		321.165	0.000319935
		321.22	0.000325533
		321.275	0.000331237
		321.33	0.00033701
		321.385	0.000342872
		321.44	0.000348823
		321.495	0.000354866
		321.55	0.000361001
		321.605	0.000367229
		321.66	0.000373553
		321.715	0.000379972
		321.77	0.000386488
		321.825	0.000393102
		321.88	0.000399816
		321.935	0.00040663
		321.99	0.000413547
		322.045	0.000420567
		322.1	0.000427691
		322.155	0.000434921
		322.21	0.000442258
		322.265	0.000449703
		322.32	0.000457258
		322.375	0.000464923
		322.43	0.000472701
		322.485	0.000480593
		322.54	0.000488599
		322.595	0.000496722
		322.65	0.000504963
		322.705	0.000513322
		322.76	0.000521822
		322.815	0.000530424
		322.87	0.00053915
		322.925	0.00054802
		322.98	0.000556997
		323.035	0.000566102
		323.09	0.000575335
		323.145	0.000584699
		323.2	0.000594195
		323.255	0.000603824
		323.31	0.000613588
		323.365	0.000623489
		323.42	0.000633527
		323.475	0.000643725
		323.53	0.000654044
		323.585	0.000664506
		323.64	0.000675112
		323.695	0.000685863
		323.75	0.000696762
		323.805	0.000707809
		323.86	0.000719007
		323.915	0.000730356
		323.97	0.000741859
		324.025	0.000753517
		324.08	0.000765331
		324.135	0.000777304
		324.19	0.000789437
		324.245	0.000801731
		324.3	0.000814189
		324.355	0.000826811
		324.41	0.0008396
		324.465	0.000852558
		324.52	0.000865685
		324.575	0.000878983
		324.63	0.000892455
		324.685	0.000906102
		324.74	0.000919925
		324.795	0.000933927
		324.85	0.000948109
		324.905	0.000962472
		324.96	0.000977019
		325.015	0.000991752
		325.07	0.00100667
		325.125	0.00102178
		325.18	0.00103708
		325.235	0.00105257
		325.29	0.00106825
		325.345	0.00108413
		325.4	0.00110021
		325.455	0.00111649
		325.51	0.00113296
		325.565	0.00114965
		325.62	0.00116653
		325.675	0.00118362
		325.73	0.00120092
		325.785	0.00121843
		325.84	0.00123615
		325.895	0.00125409
		325.95	0.00127224
		326.005	0.00129062
		326.06	0.00130921
		326.115	0.00132802
		326.17	0.00134704
		326.225	0.0013663
		326.28	0.00138578
		326.335	0.00140548
		326.39	0.00142542
		326.445	0.00144559
		326.5	0.00146599
		326.555	0.00148662
		326.61	0.00150749
		326.665	0.0015286
		326.72	0.00154995
		326.775	0.00157154
		326.83	0.00159338
		326.885	0.00161546
		326.94	0.00163779
		326.995	0.00166037
		327.05	0.00168319
		327.105	0.00170627
		327.16	0.00172961
		327.215	0.0017532
		327.27	0.00177704
		327.325	0.00180115
		327.38	0.00182552
		327.435	0.00185014
		327.49	0.00187504
		327.545	0.0019002
		327.6	0.00192562
		327.655	0.00195132
		327.71	0.00197728
		327.765	0.00200352
		327.82	0.00203004
		327.875	0.00205682
		327.93	0.00208389
		327.985	0.00211123
		328.04	0.00213886
		328.095	0.00216676
		328.15	0.00219497
		328.205	0.00222344
		328.26	0.0022522
		328.315	0.00228125
		328.37	0.00231059
		328.425	0.00234022
		328.48	0.00237014
		328.535	0.00240035
		328.59	0.00243088
		328.645	0.00246168
		328.7	0.00249279
		328.755	0.00252419
		328.81	0.00255589
		328.865	0.00258789
		328.92	0.0026202
		328.975	0.00265281
		329.03	0.00268572
		329.085	0.00271895
		329.14	0.00275248
		329.195	0.00278632
		329.25	0.00282046
		329.305	0.00285494
		329.36	0.00288972
		329.415	0.0029248
		329.47	0.0029602
		329.525	0.00299592
		329.58	0.00303195
		329.635	0.0030683
		329.69	0.00310497
		329.745	0.00314196
		329.8	0.00317926
		329.855	0.00321689
		329.91	0.00325484
		329.965	0.00329312
		330.02	0.00333171
		330.075	0.00337063
		330.13	0.00340988
		330.185	0.00344945
		330.24	0.00348935
		330.295	0.00352958
		330.35	0.00357013
		330.405	0.00361101
		330.46	0.00365222
		330.515	0.00369376
		330.57	0.00373563
		330.625	0.00377783
		330.68	0.00382036
		330.735	0.00386322
		330.79	0.00390641
		330.845	0.00394994
		330.9	0.00399379
		330.955	0.004038
		331.01	0.00408253
		331.065	0.00412738
		331.12	0.00417257
		331.175	0.0042181
		331.23	0.00426397
		331.285	0.00431016
		331.34	0.00435669
		331.395	0.00440355
		331.45	0.00445074
		331.505	0.00449826
		331.56	0.00454612
		331.615	0.00459432
		331.67	0.00464285
		331.725	0.00469171
		331.78	0.0047409
		331.835	0.00479043
		331.89	0.00484029
		331.945	0.00489048
		332	0.004941
		332.055	0.00499186
		332.11	0.00504305
		332.165	0.00509457
		332.22	0.00514642
		332.275	0.0051986
		332.33	0.00525111
		332.385	0.00530395
		332.44	0.00535711
		332.495	0.00541061
		332.55	0.00546443
		332.605	0.00551858
		332.66	0.00557306
		332.715	0.00562787
		332.77	0.00568299
		332.825	0.00573845
		332.88	0.00579422
		332.935	0.00585032
		332.99	0.00590674
		333.045	0.00596348
		333.1	0.00602054
		333.155	0.00607792
		333.21	0.00613562
		333.265	0.00619364
		333.32	0.00625197
		333.375	0.00631062
		333.43	0.00636958
		333.485	0.00642885
		333.54	0.00648844
		333.595	0.00654834
		333.65	0.00660855
		333.705	0.00666907
		333.76	0.0067299
		333.815	0.00679103
		333.87	0.00685247
		333.925	0.00691421
		333.98	0.00697625
		334.035	0.0070386
		334.09	0.00710125
		334.145	0.00716419
		334.2	0.00722744
		334.255	0.00729098
		334.31	0.00735481
		334.365	0.00741894
		334.42	0.00748337
		334.475	0.00754808
		334.53	0.00761308
		334.585	0.00767837
		334.64	0.00774395
		334.695	0.00780982
		334.75	0.00787596
		334.805	0.00794239
		334.86	0.0080091
		334.915	0.00807609
		334.97	0.00814336
		335.025	0.0082109
		335.08	0.00827872
		335.135	0.00834682
		335.19	0.00841518
		335.245	0.00848381
		335.3	0.00855272
		335.355	0.00862189
		335.41	0.00869132
		335.465	0.00876102
		335.52	0.00883098
		335.575	0.00890121
		335.63	0.00897169
		335.685	0.00904243
		335.74	0.00911342
		335.795	0.00918467
		335.85	0.00925617
		335.905	0.00932792
		335.96	0.00939993
		336.015	0.00947217
		336.07	0.00954467
		336.125	0.00961741
		336.18	0.00969039
		336.235	0.00976361
		336.29	0.00983708
		336.345	0.00991078
		336.4	0.00998471
		336.455	0.0100589
		336.51	0.0101333
		336.565	0.0102079
		336.62	0.0102828
		336.675	0.0103579
		336.73	0.0104332
		336.785	0.0105087
		336.84	0.0105845
		336.895	0.0106605
		336.95	0.0107367
		337.005	0.0108131
		337.06	0.0108897
		337.115	0.0109666
		337.17	0.0110436
		337.225	0.0111209
		337.28	0.0111984
		337.335	0.0112761
		337.39	0.011354
		337.445	0.0114321
		337.5	0.0115104
		337.555	0.0115889
		337.61	0.0116676
		337.665	0.0117465
		337.72	0.0118256
		337.775	0.0119049
		337.83	0.0119844
		337.885	0.012064
		337.94	0.0121439
		337.995	0.0122239
		338.05	0.0123042
		338.105	0.0123846
		338.16	0.0124652
		338.215	0.0125459
		338.27	0.0126269
		338.325	0.012708
		338.38	0.0127893
		338.435	0.0128708
		338.49	0.0129525
		338.545	0.0130343
		338.6	0.0131163
		338.655	0.0131984
		338.71	0.0132808
		338.765	0.0133632
		338.82	0.0134459
		338.875	0.0135287
		338.93	0.0136116
		338.985	0.0136947
		339.04	0.013778
		339.095	0.0138614
		339.15	0.013945
		339.205	0.0140287
		339.26	0.0141126
		339.315	0.0141966
		339.37	0.0142807
		339.425	0.014365
		339.48	0.0144495
		339.535	0.014534
		339.59	0.0146187
		339.645	0.0147036
		339.7	0.0147885
		339.755	0.0148736
		339.81	0.0149588
		339.865	0.0150442
		339.92	0.0151297
		339.975	0.0152153
		340.03	0.015301
		340.085	0.0153868
		340.14	0.0154727
		340.195	0.0155588
		340.25	0.0156449
		340.305	0.0157312
		340.36	0.0158176
		340.415	0.0159041
		340.47	0.0159907
		340.525	0.0160773
		340.58	0.0161641
		340.635	0.016251
		340.69	0.016338
		340.745	0.016425
		340.8	0.0165122
		340.855	0.0165994
		340.91	0.0166867
		340.965	0.0167741
		341.02	0.0168616
		341.075	0.0169491
		341.13	0.0170367
		341.185	0.0171244
		341.24	0.0172122
		341.295	0.0173
		341.35	0.0173879
		341.405	0.0174758
		341.46	0.0175638
		341.515	0.0176519
		341.57	0.01774
		341.625	0.0178282
		341.68	0.0179164
		341.735	0.0180046
		341.79	0.0180929
		341.845	0.0181812
		341.9	0.0182696
		341.955	0.018358
		342.01	0.0184464
		342.065	0.0185348
		342.12	0.0186233
		342.175	0.0187118
		342.23	0.0188003
		342.285	0.0188888
		342.34	0.0189773
		342.395	0.0190658
		342.45	0.0191543
		342.505	0.0192429
		342.56	0.0193314
		342.615	0.0194199
		342.67	0.0195084
		342.725	0.0195969
		342.78	0.0196854
		342.835	0.0197738
		342.89	0.0198622
		342.945	0.0199506
		343	0.020039
		343.055	0.0201273
		343.11	0.0202156
		343.165	0.0203039
		343.22	0.0203921
		343.275	0.0204802
		343.33	0.0205683
		343.385	0.0206563
		343.44	0.0207443
		343.495	0.0208322
		343.55	0.02092
		343.605	0.0210078
		343.66	0.0210954
		343.715	0.021183
		343.77	0.0212705
		343.825	0.0213579
		343.88	0.0214453
		343.935	0.0215325
		343.99	0.0216196
		344.045	0.0217066
		344.1	0.0217935
		344.155	0.0218803
		344.21	0.0219669
		344.265	0.0220534
		344.32	0.0221398
		344.375	0.0222261
		344.43	0.0223122
		344.485	0.0223982
		344.54	0.022484
		344.595	0.0225697
		344.65	0.0226552
		344.705	0.0227406
		344.76	0.0228257
		344.815	0.0229108
		344.87	0.0229956
		344.925	0.0230803
		344.98	0.0231647
		345.035	0.023249
		345.09	0.0233331
		345.145	0.023417
		345.2	0.0235007
		345.255	0.0235842
		345.31	0.0236674
		345.365	0.0237505
		345.42	0.0238333
		345.475	0.0239159
		345.53	0.0239983
		345.585	0.0240804
		345.64	0.0241623
		345.695	0.0242439
		345.75	0.0243253
		345.805	0.0244064
		345.86	0.0244872
		345.915	0.0245678
		345.97	0.0246481
		346.025	0.0247282
		346.08	0.0248079
		346.135	0.0248874
		346.19	0.0249666
		346.245	0.0250455
		346.3	0.0251241
		346.355	0.0252023
		346.41	0.0252803
		346.465	0.0253579
		346.52	0.0254353
		346.575	0.0255123
		346.63	0.0255889
		346.685	0.0256653
		346.74	0.0257413
		346.795	0.0258169
		346.85	0.0258922
		346.905	0.0259671
		346.96	0.0260417
		347.015	0.0261159
		347.07	0.0261898
		347.125	0.0262632
		347.18	0.0263363
		347.235	0.026409
		347.29	0.0264814
		347.345	0.0265533
		347.4	0.0266248
		347.455	0.0266959
		347.51	0.0267666
		347.565	0.0268369
		347.62	0.0269068
		347.675	0.0269763
		347.73	0.0270453
		347.785	0.0271139
		347.84	0.0271821
		347.895	0.0272498
		347.95	0.0273171
		348.005	0.0273839
		348.06	0.0274503
		348.115	0.0275162
		348.17	0.0275817
		348.225	0.0276467
		348.28	0.0277112
		348.335	0.0277753
		348.39	0.0278389
		348.445	0.0279019
		348.5	0.0279645
		348.555	0.0280267
		348.61	0.0280883
		348.665	0.0281494
		348.72	0.02821
		348.775	0.0282701
		348.83	0.0283297
		348.885	0.0283888
		348.94	0.0284473
		348.995	0.0285054
		349.05	0.0285629
		349.105	0.0286199
		349.16	0.0286763
		349.215	0.0287322
		349.27	0.0287876
		349.325	0.0288424
		349.38	0.0288967
		349.435	0.0289504
		349.49	0.0290036
		349.545	0.0290562
		349.6	0.0291082
		349.655	0.0291597
		349.71	0.0292106
		349.765	0.0292609
		349.82	0.0293107
		349.875	0.0293599
		349.93	0.0294085
		349.985	0.0294565
		350.04	0.0295039
		350.095	0.0295508
		350.15	0.029597
		350.205	0.0296427
		350.26	0.0296877
		350.315	0.0297322
		350.37	0.029776
		350.425	0.0298193
		350.48	0.0298619
		350.535	0.0299039
		350.59	0.0299453
		350.645	0.0299861
		350.7	0.0300263
		350.755	0.0300659
		350.81	0.0301048
		350.865	0.0301431
		350.92	0.0301808
		350.975	0.0302178
		351.03	0.0302542
		351.085	0.03029
		351.14	0.0303252
		351.195	0.0303597
		351.25	0.0303936
		351.305	0.0304268
		351.36	0.0304594
		351.415	0.0304914
		351.47	0.0305227
		351.525	0.0305533
		351.58	0.0305833
		351.635	0.0306127
		351.69	0.0306414
		351.745	0.0306695
		351.8	0.0306969
		351.855	0.0307236
		351.91	0.0307497
		351.965	0.0307752
		352.02	0.0308
		352.075	0.0308241
		352.13	0.0308476
		352.185	0.0308704
		352.24	0.0308925
		352.295	0.030914
		352.35	0.0309348
		352.405	0.030955
		352.46	0.0309745
		352.515	0.0309933
		352.57	0.0310115
		352.625	0.031029
		352.68	0.0310459
		352.735	0.031062
		352.79	0.0310776
		352.845	0.0310924
		352.9	0.0311066
		352.955	0.0311201
		353.01	0.031133
		353.065	0.0311452
		353.12	0.0311567
		353.175	0.0311675
		353.23	0.0311777
		353.285	0.0311873
		353.34	0.0311961
		353.395	0.0312044
		353.45	0.0312119
		353.505	0.0312188
		353.56	0.031225
		353.615	0.0312305
		353.67	0.0312354
		353.725	0.0312397
		353.78	0.0312433
		353.835	0.0312462
		353.89	0.0312484
		353.945	0.03125
		354	0.031251
		354.055	0.0312513
		354.11	0.0312509
		354.165	0.0312499
		354.22	0.0312483
		354.275	0.031246
		354.33	0.031243
		354.385	0.0312394
		354.44	0.0312352
		354.495	0.0312303
		354.55	0.0312247
		354.605	0.0312185
		354.66	0.0312117
		354.715	0.0312043
		354.77	0.0311962
		354.825	0.0311874
		354.88	0.0311781
		354.935	0.0311681
		354.99	0.0311575
		355.045	0.0311462
		355.1	0.0311344
		355.155	0.0311219
		355.21	0.0311087
		355.265	0.031095
		355.32	0.0310806
		355.375	0.0310657
		355.43	0.0310501
		355.485	0.0310339
		355.54	0.0310171
		355.595	0.0309997
		355.65	0.0309816
		355.705	0.030963
		355.76	0.0309438
		355.815	0.030924
		355.87	0.0309036
		355.925	0.0308826
		355.98	0.030861
		356.035	0.0308388
		356.09	0.0308161
		356.145	0.0307927
		356.2	0.0307688
		356.255	0.0307443
		356.31	0.0307192
		356.365	0.0306936
		356.42	0.0306674
		356.475	0.0306406
		356.53	0.0306132
		356.585	0.0305853
		356.64	0.0305569
		356.695	0.0305279
		356.75	0.0304983
		356.805	0.0304682
		356.86	0.0304376
		356.915	0.0304064
		356.97	0.0303746
		357.025	0.0303424
		357.08	0.0303096
		357.135	0.0302762
		357.19	0.0302424
		357.245	0.030208
		357.3	0.0301731
		357.355	0.0301377
		357.41	0.0301018
		357.465	0.0300654
		357.52	0.0300284
		357.575	0.029991
		357.63	0.029953
		357.685	0.0299146
		357.74	0.0298757
		357.795	0.0298362
		357.85	0.0297963
		357.905	0.029756
		357.96	0.0297151
		358.015	0.0296738
		358.07	0.0296319
		358.125	0.0295897
		358.18	0.0295469
		358.235	0.0295037
		358.29	0.02946
		358.345	0.0294159
		358.4	0.0293714
		358.455	0.0293263
		358.51	0.0292809
		358.565	0.029235
		358.62	0.0291887
		358.675	0.0291419
		358.73	0.0290947
		358.785	0.0290471
		358.84	0.028999
		358.895	0.0289506
		358.95	0.0289017
		359.005	0.0288524
		359.06	0.0288028
		359.115	0.0287527
		359.17	0.0287022
		359.225	0.0286513
		359.28	0.0286
		359.335	0.0285484
		359.39	0.0284963
		359.445	0.0284439
		359.5	0.0283911
		359.555	0.0283379
		359.61	0.0282844
		359.665	0.0282305
		359.72	0.0281762
		359.775	0.0281216
		359.83	0.0280666
		359.885	0.0280113
		359.94	0.0279556
		359.995	0.0278996
		360.05	0.0278432
		360.105	0.0277865
		360.16	0.0277295
		360.215	0.0276721
		360.27	0.0276144
		360.325	0.0275564
		360.38	0.0274981
		360.435	0.0274395
		360.49	0.0273806
		360.545	0.0273213
		360.6	0.0272618
		360.655	0.027202
		360.71	0.0271418
		360.765	0.0270814
		360.82	0.0270207
		360.875	0.0269597
		360.93	0.0268984
		360.985	0.0268369
		361.04	0.0267751
		361.095	0.026713
		361.15	0.0266506
		361.205	0.026588
		361.26	0.0265252
		361.315	0.026462
		361.37	0.0263987
		361.425	0.026335
		361.48	0.0262712
		361.535	0.0262071
		361.59	0.0261428
		361.645	0.0260782
		361.7	0.0260134
		361.755	0.0259484
		361.81	0.0258831
		361.865	0.0258177
		361.92	0.025752
		361.975	0.0256861
		362.03	0.02562
		362.085	0.0255537
		362.14	0.0254873
		362.195	0.0254206
		362.25	0.0253537
		362.305	0.0252866
		362.36	0.0252193
		362.415	0.0251519
		362.47	0.0250843
		362.525	0.0250165
		362.58	0.0249485
		362.635	0.0248804
		362.69	0.0248121
		362.745	0.0247436
		362.8	0.024675
		362.855	0.0246062
		362.91	0.0245373
		362.965	0.0244682
		363.02	0.0243989
		363.075	0.0243296
		363.13	0.0242601
		363.185	0.0241904
		363.24	0.0241206
		363.295	0.0240507
		363.35	0.0239806
		363.405	0.0239105
		363.46	0.0238402
		363.515	0.0237698
		363.57	0.0236993
		363.625	0.0236286
		363.68	0.0235579
		363.735	0.023487
		363.79	0.0234161
		363.845	0.023345
		363.9	0.0232739
		363.955	0.0232026
		364.01	0.0231313
		364.065	0.0230599
		364.12	0.0229884
		364.175	0.0229168
		364.23	0.0228452
		364.285	0.0227734
		364.34	0.0227016
		364.395	0.0226297
		364.45	0.0225578
		364.505	0.0224857
		364.56	0.0224137
		364.615	0.0223415
		364.67	0.0222693
		364.725	0.0221971
		364.78	0.0221248
		364.835	0.0220524
		364.89	0.0219801
		364.945	0.0219076
		365	0.0218351
		365.055	0.0217626
		365.11	0.0216901
		365.165	0.0216175
		365.22	0.0215449
		365.275	0.0214722
		365.33	0.0213996
		365.385	0.0213269
		365.44	0.0212542
		365.495	0.0211815
		365.55	0.0211087
		365.605	0.021036
		365.66	0.0209632
		365.715	0.0208905
		365.77	0.0208177
		365.825	0.0207449
		365.88	0.0206721
		365.935	0.0205994
		365.99	0.0205266
		366.045	0.0204538
		366.1	0.0203811
		366.155	0.0203083
		366.21	0.0202356
		366.265	0.0201629
		366.32	0.0200902
		366.375	0.0200175
		366.43	0.0199449
		366.485	0.0198723
		366.54	0.0197997
		366.595	0.0197271
		366.65	0.0196546
		366.705	0.0195821
		366.76	0.0195096
		366.815	0.0194372
		366.87	0.0193648
		366.925	0.0192924
		366.98	0.0192201
		367.035	0.0191479
		367.09	0.0190757
		367.145	0.0190035
		367.2	0.0189314
		367.255	0.0188593
		367.31	0.0187873
		367.365	0.0187154
		367.42	0.0186435
		367.475	0.0185717
		367.53	0.0185
		367.585	0.0184283
		367.64	0.0183566
		367.695	0.0182851
		367.75	0.0182136
		367.805	0.0181422
		367.86	0.0180709
		367.915	0.0179996
		367.97	0.0179284
		368.025	0.0178573
		368.08	0.0177863
		368.135	0.0177154
		368.19	0.0176445
		368.245	0.0175738
		368.3	0.0175031
		368.355	0.0174325
		368.41	0.017362
		368.465	0.0172916
		368.52	0.0172213
		368.575	0.0171511
		368.63	0.017081
		368.685	0.017011
		368.74	0.0169411
		368.795	0.0168713
		368.85	0.0168016
		368.905	0.016732
		368.96	0.0166625
		369.015	0.0165932
		369.07	0.0165239
		369.125	0.0164548
		369.18	0.0163857
		369.235	0.0163168
		369.29	0.016248
		369.345	0.0161793
		369.4	0.0161108
		369.455	0.0160423
		369.51	0.015974
		369.565	0.0159058
		369.62	0.0158377
		369.675	0.0157698
		369.73	0.0157019
		369.785	0.0156342
		369.84	0.0155667
		369.895	0.0154993
		369.95	0.015432
		370.005	0.0153648
		370.06	0.0152978
		370.115	0.0152309
		370.17	0.0151641
		370.225	0.0150975
		370.28	0.015031
		370.335	0.0149647
		370.39	0.0148985
		370.445	0.0148324
		370.5	0.0147665
		370.555	0.0147008
		370.61	0.0146352
		370.665	0.0145697
		370.72	0.0145044
		370.775	0.0144392
		370.83	0.0143742
		370.885	0.0143093
		370.94	0.0142446
		370.995	0.0141801
		371.05	0.0141156
		371.105	0.0140514
		371.16	0.0139873
		371.215	0.0139234
		371.27	0.0138596
		371.325	0.013796
		371.38	0.0137325
		371.435	0.0136692
		371.49	0.0136061
		371.545	0.0135431
		371.6	0.0134803
		371.655	0.0134177
		371.71	0.0133552
		371.765	0.0132929
		371.82	0.0132308
		371.875	0.0131688
		371.93	0.013107
		371.985	0.0130454
		372.04	0.0129839
		372.095	0.0129226
		372.15	0.0128615
		372.205	0.0128006
		372.26	0.0127398
		372.315	0.0126792
		372.37	0.0126188
		372.425	0.0125585
		372.48	0.0124985
		372.535	0.0124386
		372.59	0.0123788
		372.645	0.0123193
		372.7	0.0122599
		372.755	0.0122008
		372.81	0.0121418
		372.865	0.0120829
		372.92	0.0120243
		372.975	0.0119658
		373.03	0.0119075
		373.085	0.0118495
		373.14	0.0117915
		373.195	0.0117338
		373.25	0.0116763
		373.305	0.0116189
		373.36	0.0115617
		373.415	0.0115047
		373.47	0.0114479
		373.525	0.0113913
		373.58	0.0113348
		373.635	0.0112786
		373.69	0.0112225
		373.745	0.0111666
		373.8	0.0111109
		373.855	0.0110554
		373.91	0.0110001
		373.965	0.010945
		374.02	0.0108901
		374.075	0.0108353
		374.13	0.0107808
		374.185	0.0107264
		374.24	0.0106722
		374.295	0.0106183
		374.35	0.0105645
		374.405	0.0105108
		374.46	0.0104574
		374.515	0.0104042
		374.57	0.0103512
		374.625	0.0102983
		374.68	0.0102457
		374.735	0.0101932
		374.79	0.010141
		374.845	0.0100889
		374.9	0.010037
		374.955	0.00998535
		375.01	0.00993386
		375.065	0.00988256
		375.12	0.00983145
		375.175	0.00978054
		375.23	0.00972982
		375.285	0.00967929
		375.34	0.00962895
		375.395	0.00957881
		375.45	0.00952886
		375.505	0.0094791
		375.56	0.00942953
		375.615	0.00938016
		375.67	0.00933098
		375.725	0.009282
		375.78	0.0092332
		375.835	0.0091846
		375.89	0.00913619
		375.945	0.00908798
		376	0.00903995
		376.055	0.00899212
		376.11	0.00894448
		376.165	0.00889704
		376.22	0.00884978
		376.275	0.00880272
		376.33	0.00875585
		376.385	0.00870917
		376.44	0.00866268
		376.495	0.00861638
		376.55	0.00857028
		376.605	0.00852436
		376.66	0.00847864
		376.715	0.00843311
		376.77	0.00838776
		376.825	0.00834261
		376.88	0.00829765
		376.935	0.00825287
		376.99	0.00820829
		377.045	0.00816389
		377.1	0.00811969
		377.155	0.00807567
		377.21	0.00803184
		377.265	0.0079882
		377.32	0.00794475
		377.375	0.00790148
		377.43	0.00785841
		377.485	0.00781552
		377.54	0.00777281
		377.595	0.00773029
		377.65	0.00768796
		377.705	0.00764581
		377.76	0.00760385
		377.815	0.00756207
		377.87	0.00752048
		377.925	0.00747907
		377.98	0.00743785
		378.035	0.00739681
		378.09	0.00735595
		378.145	0.00731528
		378.2	0.00727478
		378.255	0.00723447
		378.31	0.00719434
		378.365	0.0071544
		378.42	0.00711463
		378.475	0.00707504
		378.53	0.00703563
		378.585	0.0069964
		378.64	0.00695735
		378.695	0.00691848
		378.75	0.00687979
		378.805	0.00684127
		378.86	0.00680293
		378.915	0.00676477
		378.97	0.00672679
		379.025	0.00668898
		379.08	0.00665134
		379.135	0.00661388
		379.19	0.00657659
		379.245	0.00653948
		379.3	0.00650254
		379.355	0.00646578
		379.41	0.00642918
		379.465	0.00639276
		379.52	0.00635651
		379.575	0.00632043
		379.63	0.00628452
		379.685	0.00624878
		379.74	0.0062132
		379.795	0.0061778
		379.85	0.00614257
		379.905	0.0061075
		379.96	0.0060726
		380.015	0.00603786
		380.07	0.00600329
		380.125	0.00596889
		380.18	0.00593465
		380.235	0.00590058
		380.29	0.00586667
		380.345	0.00583292
		380.4	0.00579934
		380.455	0.00576591
		380.51	0.00573265
		380.565	0.00569955
		380.62	0.00566661
		380.675	0.00563383
		380.73	0.00560121
		380.785	0.00556875
		380.84	0.00553644
		380.895	0.00550429
		380.95	0.0054723
		381.005	0.00544047
		381.06	0.00540879
		381.115	0.00537727
		381.17	0.0053459
		381.225	0.00531468
		381.28	0.00528362
		381.335	0.00525271
		381.39	0.00522195
		381.445	0.00519135
		381.5	0.00516089
		381.555	0.00513059
		381.61	0.00510044
		381.665	0.00507043
		381.72	0.00504057
		381.775	0.00501086
		381.83	0.0049813
		381.885	0.00495189
		381.94	0.00492262
		381.995	0.0048935
		382.05	0.0048645
		382.105	0.00483567
		382.16	0.00480698
		382.215	0.00477843
		382.27	0.00475003
		382.325	0.00472177
		382.38	0.00469365
		382.435	0.00466567
		382.49	0.00463783
		382.545	0.00461014
		382.6	0.00458258
		382.655	0.00455514
		382.71	0.00452785
		382.765	0.00450071
		382.82	0.0044737
		382.875	0.00444683
		382.93	0.00442009
		382.985	0.00439349
		383.04	0.00436702
		383.095	0.00434069
		383.15	0.00431449
		383.205	0.00428842
		383.26	0.00426248
		383.315	0.00423668
		383.37	0.004211
		383.425	0.00418546
		383.48	0.00416004
		383.535	0.00413476
		383.59	0.0041096
		383.645	0.00408457
		383.7	0.00405967
		383.755	0.0040349
		383.81	0.00401025
		383.865	0.00398573
		383.92	0.00396133
		383.975	0.00393706
		384.03	0.00391291
		384.085	0.00388889
		384.14	0.00386498
		384.195	0.0038412
		384.25	0.00381753
		384.305	0.00379399
		384.36	0.00377057
		384.415	0.00374728
		384.47	0.0037241
		384.525	0.00370105
		384.58	0.00367811
		384.635	0.00365529
		384.69	0.00363258
		384.745	0.00361
		384.8	0.00358753
		384.855	0.00356517
		384.91	0.00354293
		384.965	0.00352081
		385.02	0.0034988
		385.075	0.0034769
		385.13	0.0034551
		385.185	0.00343343
		385.24	0.00341187
		385.295	0.00339043
		385.35	0.00336909
		385.405	0.00334785
		385.46	0.00332673
		385.515	0.00330573
		385.57	0.00328483
		385.625	0.00326405
		385.68	0.00324337
		385.735	0.0032228
		385.79	0.00320233
		385.845	0.00318197
		385.9	0.00316172
		385.955	0.00314158
		386.01	0.00312153
		386.065	0.0031016
		386.12	0.00308177
		386.175	0.00306204
		386.23	0.00304239
		386.285	0.00302287
		386.34	0.00300345
		386.395	0.00298413
		386.45	0.00296491
		386.505	0.0029458
		386.56	0.00292678
		386.615	0.00290786
		386.67	0.00288905
		386.725	0.00287033
		386.78	0.00285169
		386.835	0.00283317
		386.89	0.00281475
		386.945	0.00279642
		387	0.00277819
		387.055	0.00276006
		387.11	0.002742
		387.165	0.00272406
		387.22	0.00270621
		387.275	0.00268846
		387.33	0.00267081
		387.385	0.00265324
		387.44	0.00263577
		387.495	0.00261839
		387.55	0.00260111
		387.605	0.00258391
		387.66	0.00256681
		387.715	0.0025498
		387.77	0.00253288
		387.825	0.00251605
		387.88	0.00249931
		387.935	0.00248266
		387.99	0.0024661
		388.045	0.00244963
		388.1	0.00243324
		388.155	0.00241695
		388.21	0.00240074
		388.265	0.0023846
		388.32	0.00236857
		388.375	0.00235262
		388.43	0.00233676
		388.485	0.00232098
		388.54	0.00230529
		388.595	0.00228969
		388.65	0.00227416
		388.705	0.00225873
		388.76	0.00224337
		388.815	0.0022281
		388.87	0.00221292
		388.925	0.00219781
		388.98	0.00218279
		389.035	0.00216785
		389.09	0.00215299
		389.145	0.00213822
		389.2	0.00212352
		389.255	0.00210891
		389.31	0.00209437
		389.365	0.00207991
		389.42	0.00206554
		389.475	0.00205124
		389.53	0.00203702
		389.585	0.00202288
		389.64	0.00200882
		389.695	0.00199484
		389.75	0.00198091
		389.805	0.00196708
		389.86	0.00195333
		389.915	0.00193966
		389.97	0.00192606
		390.025	0.00191251
		390.08	0.00189907
		390.135	0.00188567
		390.19	0.00187238
		390.245	0.00185916
		390.3	0.00184601
		390.355	0.00183293
		390.41	0.00181993
		390.465	0.001807
		390.52	0.00179415
		390.575	0.00178137
		390.63	0.00176866
		390.685	0.00175602
		390.74	0.00174345
		390.795	0.00173094
		390.85	0.00171851
		390.905	0.00170616
		390.96	0.00169388
		391.015	0.00168166
		391.07	0.00166952
		391.125	0.00165745
		391.18	0.00164545
		391.235	0.00163349
		391.29	0.00162163
		391.345	0.00160983
		391.4	0.0015981
		391.455	0.00158644
		391.51	0.00157484
		391.565	0.00156332
		391.62	0.00155186
		391.675	0.00154047
		391.73	0.00152914
		391.785	0.00151788
		391.84	0.00150668
		391.895	0.00149555
		391.95	0.00148449
		392.005	0.00147349
		392.06	0.00146256
		392.115	0.00145169
		392.17	0.00144088
		392.225	0.00143014
		392.28	0.00141946
		392.335	0.00140885
		392.39	0.00139829
		392.445	0.0013878
		392.5	0.00137738
		392.555	0.00136701
		392.61	0.00135671
		392.665	0.00134647
		392.72	0.00133629
		392.775	0.00132617
		392.83	0.00131612
		392.885	0.00130612
		392.94	0.00129618
		392.995	0.00128631
		393.05	0.00127649
		393.105	0.00126672
		393.16	0.00125702
		393.215	0.00124738
		393.27	0.00123781
		393.325	0.00122829
		393.38	0.00121883
		393.435	0.00120942
		393.49	0.00120006
		393.545	0.00119077
		393.6	0.00118154
		393.655	0.00117237
		393.71	0.00116325
		393.765	0.0011542
		393.82	0.00114519
		393.875	0.00113625
		393.93	0.00112736
		393.985	0.00111852
		394.04	0.00110974
		394.095	0.00110102
		394.15	0.00109235
		394.205	0.00108373
		394.26	0.00107517
		394.315	0.00106667
		394.37	0.00105821
		394.425	0.00104982
		394.48	0.00104147
		394.535	0.00103318
		394.59	0.00102494
		394.645	0.00101675
		394.7	0.00100862
		394.755	0.00100054
		394.81	0.00099251
		394.865	0.000984533
		394.92	0.000976607
		394.975	0.000968733
		395.03	0.00096091
		395.085	0.000953138
		395.14	0.000945397
		395.195	0.000937726
		395.25	0.000930106
		395.305	0.000922536
		395.36	0.000915015
		395.415	0.000907544
		395.47	0.000900122
		395.525	0.000892749
		395.58	0.000885425
		395.635	0.000878149
		395.69	0.000870922
		395.745	0.000863743
		395.8	0.000856612
		395.855	0.000849529
		395.91	0.000842474
		395.965	0.000835486
		396.02	0.000828544
		396.075	0.00082165
		396.13	0.000814802
		396.185	0.000808001
		396.24	0.000801245
		396.295	0.000794536
		396.35	0.000787872
		396.405	0.000781254
		396.46	0.000774681
		396.515	0.000768153
		396.57	0.00076167
		396.625	0.000755231
		396.68	0.000748837
		396.735	0.000742487
		396.79	0.000736181
		396.845	0.000729918
		396.9	0.00072368
		396.955	0.000717505
		397.01	0.000711354
		397.065	0.000705265
		397.12	0.000699219
		397.175	0.000693216
		397.23	0.000687255
		397.285	0.000681335
		397.34	0.000675458
		397.395	0.000669622
		397.45	0.000663828
		397.505	0.000658055
		397.56	0.000652343
		397.615	0.000646652
		397.67	0.000641022
		397.725	0.000635432
		397.78	0.000629882
		397.835	0.000624372
		397.89	0.000618902
		397.945	0.000613471
		398	0.00060808
		398.055	0.000602727
		398.11	0.000597414
		398.165	0.000592139
		398.22	0.000586902
		398.275	0.000581704
		398.33	0.000576543
		398.385	0.000571421
		398.44	0.000566336
		398.495	0.000561289
		398.55	0.000556279
		398.605	0.000551306
		398.66	0.00054635
		398.715	0.000541451
		398.77	0.000536588
		398.825	0.000531762
		398.88	0.000526971
		398.935	0.000522197
		398.99	0.000517479
		399.045	0.000512796
		399.1	0.000508148
		399.155	0.000503536
		399.21	0.000498958
		399.265	0.000494415
		399.32	0.000489906
		399.375	0.000485432
		399.43	0.000480991
		399.485	0.000476585
		399.54	0.000472212
		399.595	0.000467873
		399.65	0.000463567
		399.705	0.000459294
		399.76	0.000455054
		399.815	0.000450847
		399.87	0.000446672
		399.925	0.00044251
		399.98	0.000438381
		400.035	0.000434304
		400.09	0.000430259
		400.145	0.000426245
		400.2	0.000422263
		400.255	0.000418312
		400.31	0.000414392
		400.365	0.000410503
		400.42	0.000406644
		400.475	0.000402816
		400.53	0.000399018
		400.585	0.000395251
		400.64	0.000391513
		400.695	0.000387805
		400.75	0.000384088
		400.805	0.000380441
		400.86	0.000376822
		400.915	0.000373233
		400.97	0.000369672
		401.025	0.00036614
		401.08	0.000362636
		401.135	0.000359161
		401.19	0.000355714
		401.245	0.000352295
		401.3	0.000348904
		401.355	0.000345541
		401.41	0.000342204
		401.465	0.000338896
		401.52	0.000335614
		401.575	0.00033234
		401.63	0.000329112
		401.685	0.000325911
		401.74	0.000322737
		401.795	0.000319589
		401.85	0.000316467
		401.905	0.00031337
		401.96	0.0003103
		402.015	0.000307255
		402.07	0.000304236
		402.125	0.000301242
		402.18	0.000298273
		402.235	0.000295329
		402.29	0.000292409
		402.345	0.000289495
		402.4	0.000286625
		402.455	0.00028378
		402.51	0.000280959
		402.565	0.000278161
		402.62	0.000275388
		402.675	0.000272638
		402.73	0.000269912
		402.785	0.000267209
		402.84	0.000264529
		402.895	0.000261853
		402.95	0.000259219
		403.005	0.000256608
		403.06	0.00025402
		403.115	0.000251454
		403.17	0.00024891
		403.225	0.000246389
		403.28	0.000243889
		403.335	0.000241411
		403.39	0.000238955
		403.445	0.00023652
		403.5	0.000234106
		403.555	0.000231714
		403.61	0.000229343
		403.665	0.000226992
		403.72	0.000224663
		403.775	0.000222354
		403.83	0.000220065
		403.885	0.000217797
		403.94	0.000215549
		403.995	0.000213301
		404.05	0.000211093
		404.105	0.000208905
		404.16	0.000206737
		404.215	0.000204588
		404.27	0.000202459
		404.325	0.000200348
		404.38	0.000198257
		404.435	0.000196184
		404.49	0.00019413
		404.545	0.000192095
		404.6	0.000190078
		404.655	0.00018808
		404.71	0.0001861
		404.765	0.000184138
		404.82	0.000182194
		404.875	0.000180267
		404.93	0.000178359
		404.985	0.000176467
		405.04	0.000174575
		405.095	0.000172719
		405.15	0.00017088
		405.205	0.000169058
		405.26	0.000167254
		405.315	0.000165466
		405.37	0.000163694
		405.425	0.000161939
		405.48	0.000160201
		405.535	0.000158478
		405.59	0.000156772
		405.645	0.000155082
		405.7	0.000153408
		405.755	0.000151749
		405.81	0.000150107
		405.865	0.000148479
		405.92	0.000146867
		405.975	0.000145271
		406.03	0.000143689
		406.085	0.000142123
		406.14	0.000140571
		406.195	0.000139034
		406.25	0.000137512
		406.305	0.000136005
		406.36	0.000134512
		406.415	0.000133033
		406.47	0.000131549
		406.525	0.00013008
		406.58	0.000128645
		406.635	0.000127224
		406.69	0.000125816
		406.745	0.000124422
		406.8	0.000123042
		406.855	0.000121675
		406.91	0.000120321
		406.965	0.000118961
		407.02	0.000117635
		407.075	0.000116321
		407.13	0.00011502
		407.185	0.000113712
		407.24	0.000112437
		407.295	0.000111175
		407.35	0.000109925
		407.405	0.000108687
		407.46	0.000107462
		407.515	0.000106248
		407.57	0.000105047
		407.625	0.000103858
		407.68	0.000102681
		407.735	0.000101515
		407.79	0.000100361
		407.845	9.92188e-05
		407.9	9.80879e-05
		407.955	9.69684e-05
		408.01	9.58601e-05
		408.065	9.4763e-05
		408.12	9.3677e-05
		408.175	9.2602e-05
		408.23	9.15379e-05
		408.285	9.04846e-05
		408.34	8.9442e-05
		408.395	8.841e-05
		408.45	8.73886e-05
		408.505	8.63776e-05
		408.56	8.53769e-05
		408.615	8.43865e-05
		408.67	8.34063e-05
		408.725	8.24362e-05
		408.78	8.1476e-05
		408.835	8.05258e-05
		408.89	7.95854e-05
		408.945	7.86547e-05
		409	7.77337e-05
		409.055	7.68223e-05
		409.11	7.59203e-05
		409.165	7.50278e-05
		409.22	7.41445e-05
		409.275	7.32705e-05
		409.33	7.24057e-05
		409.385	7.15499e-05
		409.44	7.07031e-05
		409.495	6.98652e-05
		409.55	6.90362e-05
		409.605	6.82159e-05
		409.66	6.74042e-05
		409.715	6.66012e-05
		409.77	6.58067e-05
		409.825	6.50206e-05
		409.88	6.42429e-05
		409.935	6.34735e-05
		409.99	6.27123e-05
		410.045	6.19593e-05
		410.1	6.12143e-05
		410.155	6.04773e-05
		410.21	5.97482e-05
		410.265	5.90269e-05
		410.32	5.83135e-05
		410.375	5.76077e-05
		410.43	5.69095e-05
		410.485	5.6219e-05
		410.54	5.55359e-05
		410.595	5.48602e-05
		410.65	5.41919e-05
		410.705	5.35308e-05
		410.76	5.2877e-05
		410.815	5.22303e-05
		410.87	5.15907e-05
		410.925	5.09581e-05
		410.98	5.03324e-05
		411.035	4.97137e-05
		411.09	4.90821e-05
		411.145	4.84774e-05
		411.2	4.78794e-05
		411.255	4.72879e-05
		411.31	4.6703e-05
		411.365	4.61246e-05
		411.42	4.55526e-05
		411.475	4.4987e-05
		411.53	4.44277e-05
		411.585	4.38746e-05
		411.64	4.33277e-05
		411.695	4.27869e-05
		411.75	4.22522e-05
		411.805	4.17235e-05
		411.86	4.12007e-05
		411.915	4.06838e-05
		411.97	4.01728e-05
		412.025	3.96675e-05
		412.08	3.91679e-05
		412.135	3.8674e-05
		412.19	3.81857e-05
		412.245	3.7703e-05
		412.3	3.72257e-05
		412.355	3.67539e-05
		412.41	3.62875e-05
		412.465	3.58263e-05
		412.52	3.53705e-05
		412.575	3.49199e-05
		412.63	3.44745e-05
		412.685	3.40342e-05
		412.74	3.3599e-05
		412.795	3.31688e-05
		412.85	3.27435e-05
		412.905	3.23232e-05
		412.96	3.19078e-05
		413.015	3.14971e-05
		413.07	3.10913e-05
		413.125	3.06902e-05
		413.18	3.02937e-05
		413.235	2.99019e-05
		413.29	2.95146e-05
		413.345	2.91319e-05
		413.4	2.87537e-05
		413.455	2.83799e-05
		413.51	2.80105e-05
		413.565	2.76262e-05
		413.62	2.72659e-05
		413.675	2.69099e-05
		413.73	2.65581e-05
		413.785	2.62104e-05
		413.84	2.58669e-05
		413.895	2.55274e-05
		413.95	2.5192e-05
		414.005	2.48606e-05
		414.06	2.45331e-05
		414.115	2.42095e-05
		414.17	2.38898e-05
		414.225	2.35739e-05
		414.28	2.32619e-05
		414.335	2.29535e-05
		414.39	2.26489e-05
		414.445	2.23479e-05
		414.5	2.20506e-05
		414.555	2.17374e-05
		414.61	2.14477e-05
		414.665	2.11615e-05
		414.72	2.08788e-05
		414.775	2.05994e-05
		414.83	2.03235e-05
		414.885	2.0051e-05
		414.94	1.97817e-05
		414.995	1.95158e-05
		415.05	1.92531e-05
		415.105	1.89936e-05
		415.16	1.87373e-05
		415.215	1.84842e-05
		415.27	1.82341e-05
		415.325	1.79872e-05
		415.38	1.77432e-05
		415.435	1.75023e-05
		415.49	1.72644e-05
		415.545	1.70294e-05
		415.6	1.67973e-05
		415.655	1.65681e-05
		415.71	1.63418e-05
		415.765	1.61183e-05
		415.82	1.58975e-05
		415.875	1.56796e-05
		415.93	1.54643e-05
		415.985	1.52518e-05
		416.04	1.50419e-05
		416.095	1.48346e-05
		416.15	1.463e-05
		416.205	1.44279e-05
		416.26	1.42284e-05
		416.315	1.40314e-05
		416.37	1.38369e-05
		416.425	1.36448e-05
		416.48	1.34552e-05
		416.535	1.3268e-05
		416.59	1.30832e-05
		416.645	1.29008e-05
		416.7	1.27206e-05
		416.755	1.25428e-05
		416.81	1.23672e-05
		416.865	1.21939e-05
		416.92	1.20228e-05
		416.975	1.18539e-05
		417.03	1.16872e-05
		417.085	1.15227e-05
		417.14	1.13602e-05
		417.195	1.11999e-05
		417.25	1.10416e-05
		417.305	1.08854e-05
		417.36	1.07312e-05
		417.415	1.0579e-05
		417.47	1.04288e-05
		417.525	1.02805e-05
		417.58	1.01342e-05
		417.635	9.98978e-06
		417.69	9.84726e-06
		417.745	9.70661e-06
		417.8	9.5678e-06
		417.855	9.43081e-06
		417.91	9.29563e-06
		417.965	9.16222e-06
		418.02	9.03058e-06
		418.075	8.90067e-06
		418.13	8.77248e-06
		418.185	8.64599e-06
		418.24	8.52118e-06
		418.295	8.39802e-06
		418.35	8.2765e-06
		418.405	8.1566e-06
		418.46	8.0383e-06
		418.515	7.92158e-06
		418.57	7.80642e-06
		418.625	7.6928e-06
		418.68	7.5807e-06
		418.735	7.47011e-06
		418.79	7.361e-06
		418.845	7.25336e-06
		418.9	7.14717e-06
		418.955	7.04242e-06
		419.01	6.93908e-06
		419.065	6.83714e-06
		419.12	6.73658e-06
		419.175	6.63739e-06
		419.23	6.53954e-06
		419.285	6.44303e-06
		419.34	6.34782e-06
		419.395	6.25392e-06
		419.45	6.1613e-06
		419.505	6.06995e-06
		419.56	5.97985e-06
		419.615	5.89098e-06
		419.67	5.80333e-06
		419.725	5.71689e-06
		419.78	5.61234e-06
		419.835	5.50933e-06
		419.89	5.42729e-06
		419.945	5.34638e-06
[truncated: 1 more rows]

## Sheet: PlotDat5
Source sheet	data	300	0
Plot name	ProbDens5	300.225	0
Plot Type	16	300.45	0
1st free col	5	300.675	0
Sigma Level	2	300.9	0
Absolute Errs	TRUE	301.125	0
Symbol Type	5	301.35	0
Inverse Plot	FALSE	301.575	0
Color Plot	FALSE	301.8	0
3D plot	FALSE	302.025	0
Linear	FALSE	302.25	0
Data Range	AD266:AE321	302.475	0
Filled Symbols	TRUE	302.7	0
ConcAge	FALSE	302.925	0
ConcSwap	FALSE	303.15	0
1st Symbol-row	1	303.375	0
		303.6	0
		303.825	1.90063e-08
		304.05	2.17851e-08
		304.275	2.49485e-08
		304.5	2.85465e-08
		304.725	3.2635e-08
		304.95	3.72767e-08
		305.175	4.25418e-08
		305.4	4.85084e-08
		305.625	5.52638e-08
		305.85	6.29055e-08
		306.075	7.15417e-08
		306.3	8.12931e-08
		306.525	9.22935e-08
		306.75	1.2298e-07
		306.975	1.39923e-07
		307.2	1.5907e-07
		307.425	1.80692e-07
		307.65	2.05086e-07
		307.875	2.32585e-07
		308.1	2.63557e-07
		308.325	2.98412e-07
		308.55	3.37601e-07
		308.775	3.81627e-07
		309	4.31044e-07
		309.225	4.86463e-07
		309.45	5.4856e-07
		309.675	6.18081e-07
		309.9	6.95844e-07
		310.125	7.8275e-07
		310.35	8.79792e-07
		310.575	9.88054e-07
		310.8	1.10873e-06
		311.025	1.24313e-06
		311.25	1.41276e-06
		311.475	1.5829e-06
		311.7	1.77217e-06
		311.925	1.98254e-06
		312.15	2.21617e-06
		312.375	2.47544e-06
		312.6	2.76291e-06
		312.825	3.08141e-06
		313.05	3.43399e-06
		313.275	3.82399e-06
		313.5	4.25503e-06
		313.725	4.73105e-06
		313.95	5.25631e-06
		314.175	5.83544e-06
		314.4	6.47345e-06
		314.625	7.17576e-06
		314.85	7.94823e-06
		315.075	8.83663e-06
		315.3	9.7772e-06
		315.525	1.08101e-05
		315.75	1.19434e-05
		315.975	1.32069e-05
		316.2	1.4572e-05
		316.425	1.60669e-05
		316.65	1.77027e-05
		316.875	1.94913e-05
		317.1	2.14456e-05
		317.325	2.35796e-05
		317.55	2.59079e-05
		317.775	2.84656e-05
		318	3.12344e-05
		318.225	3.42491e-05
		318.45	3.75499e-05
		318.675	4.11451e-05
		318.9	4.50348e-05
		319.125	4.92619e-05
		319.35	5.38532e-05
		319.575	5.88381e-05
		319.8	6.4248e-05
		320.025	7.01173e-05
		320.25	7.65029e-05
		320.475	8.34098e-05
		320.7	9.08993e-05
		320.925	9.90205e-05
		321.15	0.000107827
		321.375	0.0001174
		321.6	0.000127768
		321.825	0.000139023
		322.05	0.000151247
		322.275	0.000164533
		322.5	0.000178984
		322.725	0.000194736
		322.95	0.000211884
		323.175	0.00023061
		323.4	0.000251062
		323.625	0.000273422
		323.85	0.000297878
		324.075	0.000324671
		324.3	0.000354051
		324.525	0.000386294
		324.75	0.0004217
		324.975	0.000460617
		325.2	0.000503358
		325.425	0.000550316
		325.65	0.000601889
		325.875	0.000658493
		326.1	0.000720557
		326.325	0.00078852
		326.55	0.000862822
		326.775	0.0009439
		327	0.00103217
		327.225	0.00112803
		327.45	0.00123185
		327.675	0.00134391
		327.9	0.00146447
		328.125	0.00159373
		328.35	0.00173178
		328.575	0.00187859
		328.8	0.00203404
		329.025	0.00219792
		329.25	0.0023699
		329.475	0.0025495
		329.7	0.00273616
		329.925	0.00292918
		330.15	0.00312771
		330.375	0.00333088
		330.6	0.00353768
		330.825	0.0037471
		331.05	0.00395797
		331.275	0.00416921
		331.5	0.00437972
		331.725	0.00458841
		331.95	0.00479427
		332.175	0.00499637
		332.4	0.00519395
		332.625	0.00538629
		332.85	0.00557292
		333.075	0.00575352
		333.3	0.00592796
		333.525	0.00609633
		333.75	0.00625887
		333.975	0.00641609
		334.2	0.0065686
		334.425	0.00671729
		334.65	0.0068631
		334.875	0.00700718
		335.1	0.00715078
		335.325	0.00729522
		335.55	0.00744189
		335.775	0.00759216
		336	0.00774743
		336.225	0.00790909
		336.45	0.00807841
		336.675	0.00825662
		336.9	0.00844482
		337.125	0.00864401
		337.35	0.00885504
		337.575	0.00907859
		337.8	0.00931521
		338.025	0.00956527
		338.25	0.00982901
		338.475	0.0101064
		338.7	0.0103975
		338.925	0.0107019
		339.15	0.0110192
		339.375	0.0113489
		339.6	0.0116904
		339.825	0.0120427
		340.05	0.0124051
		340.275	0.0127764
		340.5	0.0131556
		340.725	0.0135415
		340.95	0.0139329
		341.175	0.0143284
		341.4	0.0147267
		341.625	0.0151264
		341.85	0.015526
		342.075	0.0159241
		342.3	0.0163192
		342.525	0.01671
		342.75	0.0170949
		342.975	0.0174726
		343.2	0.0178417
		343.425	0.018201
		343.65	0.0185492
		343.875	0.0188852
		344.1	0.019208
		344.325	0.0195166
		344.55	0.0198102
		344.775	0.0200881
		345	0.0203497
		345.225	0.0205947
		345.45	0.0208226
		345.675	0.0210333
		345.9	0.0212269
		346.125	0.0214033
		346.35	0.0215627
		346.575	0.0217056
		346.8	0.0218322
		347.025	0.0219432
		347.25	0.022039
		347.475	0.0221204
		347.7	0.022188
		347.925	0.0222427
		348.15	0.0222851
		348.375	0.0223161
		348.6	0.0223365
		348.825	0.022347
		349.05	0.0223484
		349.275	0.0223415
		349.5	0.022327
		349.725	0.0223055
		349.95	0.0222777
		350.175	0.0222441
		350.4	0.0222053
		350.625	0.0221617
		350.85	0.0221139
		351.075	0.0220622
		351.3	0.022007
		351.525	0.0219486
		351.75	0.0218873
		351.975	0.0218235
		352.2	0.0217573
		352.425	0.021689
		352.65	0.021619
		352.875	0.0215473
		353.1	0.0214743
		353.325	0.0214002
		353.55	0.0213253
		353.775	0.0212499
		354	0.0211744
		354.225	0.021099
		354.45	0.021024
		354.675	0.02095
		354.9	0.0208774
		355.125	0.0208065
		355.35	0.0207378
		355.575	0.0206719
		355.8	0.0206092
		356.025	0.0205504
		356.25	0.0204958
		356.475	0.0204461
		356.7	0.0204018
		356.925	0.0203635
		357.15	0.0203316
		357.375	0.0203067
		357.6	0.0202891
		357.825	0.0202793
		358.05	0.0202775
		358.275	0.0202842
		358.5	0.0202994
		358.725	0.0203233
		358.95	0.0203559
		359.175	0.0203971
		359.4	0.0204467
		359.625	0.0205045
		359.85	0.0205699
		360.075	0.0206425
		360.3	0.0207217
		360.525	0.0208068
		360.75	0.020897
		360.975	0.0209914
		361.2	0.021089
		361.425	0.0211888
		361.65	0.0212899
		361.875	0.0213911
		362.1	0.0214915
		362.325	0.0215901
		362.55	0.0216857
		362.775	0.0217775
		363	0.0218646
		363.225	0.0219464
		363.45	0.022022
		363.675	0.022091
		363.9	0.0221528
		364.125	0.0222073
		364.35	0.0222541
		364.575	0.0222933
		364.8	0.0223249
		365.025	0.0223489
		365.25	0.0223657
		365.475	0.0223756
		365.7	0.022379
		365.925	0.0223764
		366.15	0.0223681
		366.375	0.0223547
		366.6	0.0223367
		366.825	0.0223146
		367.05	0.0222888
		367.275	0.0222596
		367.5	0.0222274
		367.725	0.0221925
		367.95	0.0221549
		368.175	0.0221149
		368.4	0.0220722
		368.625	0.0220269
		368.85	0.0219787
		369.075	0.0219274
		369.3	0.0218726
		369.525	0.0218138
		369.75	0.0217507
		369.975	0.0216826
		370.2	0.0216089
		370.425	0.0215292
		370.65	0.0214428
		370.875	0.021349
		371.1	0.0212473
		371.325	0.0211372
		371.55	0.021018
		371.775	0.0208893
		372	0.0207507
		372.225	0.0206017
		372.45	0.0204421
		372.675	0.0202716
		372.9	0.02009
		373.125	0.0198972
		373.35	0.0196932
		373.575	0.0194781
		373.8	0.0192519
		374.025	0.0190149
		374.25	0.0187674
		374.475	0.0185096
		374.7	0.0182419
		374.925	0.0179649
		375.15	0.017679
		375.375	0.0173847
		375.6	0.0170828
		375.825	0.0167737
		376.05	0.0164582
		376.275	0.0161369
		376.5	0.0158106
		376.725	0.0154799
		376.95	0.0151457
		377.175	0.0148085
		377.4	0.0144692
		377.625	0.0141284
		377.85	0.0137868
		378.075	0.0134452
		378.3	0.0131042
		378.525	0.0127644
		378.75	0.0124264
		378.975	0.0120909
		379.2	0.0117584
		379.425	0.0114294
		379.65	0.0111043
		379.875	0.0107837
		380.1	0.0104679
		380.325	0.0101573
		380.55	0.00985228
		380.775	0.00955311
		381	0.00926002
		381.225	0.00897328
		381.45	0.00869305
		381.675	0.00841951
		381.9	0.00815275
		382.125	0.00789288
		382.35	0.00763997
		382.575	0.00739403
		382.8	0.0071551
		383.025	0.00692314
		383.25	0.00669813
		383.475	0.00648
		383.7	0.00626867
		383.925	0.00606405
		384.15	0.00586603
		384.375	0.00567448
		384.6	0.00548928
		384.825	0.00531028
		385.05	0.00513732
		385.275	0.00497024
		385.5	0.00480891
		385.725	0.00465314
		385.95	0.00450275
		386.175	0.00435758
		386.4	0.00421746
		386.625	0.00408221
		386.85	0.00395166
		387.075	0.00382564
		387.3	0.00370398
		387.525	0.00358651
		387.75	0.00347309
		387.975	0.00336355
		388.2	0.00325774
		388.425	0.00315551
		388.65	0.0030567
		388.875	0.0029612
		389.1	0.00286885
		389.325	0.00277955
		389.55	0.00269315
		389.775	0.00260954
		390	0.0025286
		390.225	0.00245022
		390.45	0.0023743
		390.675	0.00230074
		390.9	0.00222944
		391.125	0.00216031
		391.35	0.00209327
		391.575	0.00202823
		391.8	0.00196511
		392.025	0.00190384
		392.25	0.00184434
		392.475	0.00178656
		392.7	0.00173043
		392.925	0.00167589
		393.15	0.00162287
		393.375	0.00157133
		393.6	0.00152122
		393.825	0.00147247
		394.05	0.00142507
		394.275	0.00137895
		394.5	0.00133407
		394.725	0.00129041
		394.95	0.00124793
		395.175	0.00120658
		395.4	0.00116634
		395.625	0.00112715
		395.85	0.00108901
		396.075	0.00105189
		396.3	0.00101577
		396.525	0.000980626
		396.75	0.000946404
		396.975	0.000913102
		397.2	0.000880698
		397.425	0.000849192
		397.65	0.000818543
		397.875	0.000788734
		398.1	0.000759747
		398.325	0.000731565
		398.55	0.000704173
		398.775	0.000677553
		399	0.000651675
		399.225	0.000626561
		399.45	0.00060216
		399.675	0.000578476
		399.9	0.000555514
		400.125	0.000533224
		400.35	0.000511628
		400.575	0.000490694
		400.8	0.000470393
		401.025	0.000450751
		401.25	0.000431734
		401.475	0.000413331
		401.7	0.000395529
		401.925	0.000378317
		402.15	0.000361683
		402.375	0.000345616
		402.6	0.000330103
		402.825	0.000315133
		403.05	0.000300695
		403.275	0.000286776
		403.5	0.000273364
		403.725	0.000260449
		403.95	0.000248018
		404.175	0.00023606
		404.4	0.000224563
		404.625	0.000213515
		404.85	0.000202905
		405.075	0.000192722
		405.3	0.000182953
		405.525	0.000173587
		405.75	0.000164613
		405.975	0.00015602
		406.2	0.000147779
		406.425	0.000139915
		406.65	0.000132397
		406.875	0.000125215
		407.1	0.000118358
		407.325	0.000111815
		407.55	0.000105576
		407.775	9.96132e-05
		408	9.39516e-05
		408.225	8.85624e-05
		408.45	8.34357e-05
		408.675	7.85617e-05
		408.9	7.39309e-05
		409.125	6.95339e-05
		409.35	6.53615e-05
		409.575	6.14047e-05
		409.8	5.7638e-05
		410.025	5.40888e-05
		410.25	5.07134e-05
		410.475	4.75371e-05
		410.7	4.45175e-05
		410.925	4.16822e-05
		411.15	3.89882e-05
		411.375	3.64639e-05
		411.6	3.40832e-05
		411.825	3.18395e-05
		412.05	2.97084e-05
		412.275	2.77211e-05
		412.5	2.58517e-05
		412.725	2.40943e-05
		412.95	2.24432e-05
		413.175	2.08929e-05
		413.4	1.94384e-05
		413.625	1.80745e-05
		413.85	1.67965e-05
		414.075	1.55996e-05
		414.3	1.44795e-05
		414.525	1.34319e-05
		414.75	1.24528e-05
		414.975	1.15382e-05
		415.2	1.06845e-05
		415.425	9.88814e-06
		415.65	9.14572e-06
		415.875	8.45403e-06
		416.1	7.81003e-06
		416.325	7.21082e-06
		416.55	6.65364e-06
		416.775	6.13586e-06
		417	5.65502e-06
		417.225	5.20877e-06
		417.45	4.79488e-06
		417.675	4.41125e-06
		417.9	4.0559e-06
		418.125	3.72696e-06
		418.35	3.40627e-06
		418.575	3.12674e-06
		418.8	2.86843e-06
		419.025	2.62987e-06
		419.25	2.40971e-06
		419.475	2.20664e-06
		419.7	2.01947e-06
		419.925	1.84707e-06
		420.15	1.68836e-06
		420.375	1.54236e-06
		420.6	1.40813e-06
		420.825	1.28481e-06
		421.05	1.17158e-06
		421.275	1.06768e-06
		421.5	9.72412e-07
		421.725	8.85107e-07
		421.95	8.05152e-07
		422.175	7.31977e-07
		422.4	6.65049e-07
		422.625	6.03874e-07
		422.85	5.47994e-07
		423.075	4.96983e-07
		423.3	4.50447e-07
		423.525	4.08021e-07
		423.75	3.69366e-07
		423.975	3.3417e-07
		424.2	2.84647e-07
		424.425	2.57513e-07
		424.65	2.32818e-07
		424.875	2.1036e-07
		425.1	1.89948e-07
		425.325	1.7141e-07
		425.55	1.54583e-07
		425.775	1.39321e-07
		426	1.25487e-07
		426.225	1.12955e-07
		426.45	1.01611e-07
		426.675	9.13485e-08
		426.9	8.20711e-08
		427.125	7.36896e-08
		427.35	6.61225e-08
		427.575	5.92951e-08
		427.8	5.31393e-08
		428.025	4.75927e-08
		428.25	4.25982e-08
		428.475	3.81039e-08
		428.7	3.40623e-08
		428.925	3.04303e-08
		429.15	2.71684e-08
		429.375	2.4241e-08
		429.6	2.16154e-08
		429.825	1.92621e-08
		430.05	0
		430.275	0
		430.5	0
		430.725	0
		430.95	0
		431.175	0
		431.4	0
		431.625	0
		431.85	0
		432.075	0
		432.3	0
		432.525	0
		432.75	0
		432.975	0
		433.2	0
		433.425	0
		433.65	0
		433.875	0
		434.1	0
		434.325	0
		434.55	0
		434.775	0
		435	0
		435.225	0
		435.45	0
		435.675	0
		435.9	0
		436.125	0
		436.35	0
		436.575	0
		436.8	0
		437.025	0
		437.25	0
		437.475	0
		437.7	0
		437.925	0
		438.15	0
		438.375	0
		438.6	0
		438.825	0
		439.05	0
		439.275	0
		439.5	0
		439.725	0
		439.95	0
		440.175	0
		440.4	0
		440.625	0
		440.85	0
		441.075	0
		441.3	0
		441.525	0
		441.75	0
		441.975	0
		442.2	0
		442.425	0
		442.65	0
		442.875	0
		443.1	0
		443.325	0
		443.55	0
		443.775	0
		444	0
		444.225	0
		444.45	0
		444.675	0
		444.9	0
		445.125	0
		445.35	0
		445.575	0
		445.8	0
		446.025	0
		446.25	0
		446.475	0
		446.7	0
		446.925	0
		447.15	0
		447.375	0
		447.6	0
		447.825	0
		448.05	0
		448.275	0
		448.5	0
		448.725	0
		448.95	0
		449.175	0
		449.4	0
		449.625	0
		449.85	0
		450.075	0
		450.3	0
		450.525	0
		450.75	0
		450.975	0
		451.2	0
		451.425	0
		451.65	0
		451.875	0
		452.1	0
		452.325	0
		452.55	0
		452.775	0
		453	0
		453.225	0
		453.45	0
		453.675	0
		453.9	0
		454.125	0
		454.35	0
		454.575	0
		454.8	0
		455.025	0
		455.25	0
		455.475	0
		455.7	0
		455.925	0
		456.15	0
		456.375	0
		456.6	0
		456.825	0
		457.05	0
		457.275	0
		457.5	0
		457.725	0
		457.95	0
		458.175	0
		458.4	0
		458.625	0
		458.85	0
		459.075	0
		459.3	0
		459.525	0
		459.75	0
		459.975	0
		460.2	0
		460.425	0
		460.65	0
		460.875	0
		461.1	0
		461.325	0
		461.55	0
		461.775	0
		462	0
		462.225	0
		462.45	0
		462.675	0
		462.9	0
		463.125	0
		463.35	0
		463.575	0
		463.8	0
		464.025	0
		464.25	0
		464.475	0
		464.7	0
		464.925	0
		465.15	0
		465.375	0
		465.6	0
		465.825	0
		466.05	0
		466.275	0
		466.5	0
		466.725	0
		466.95	0
		467.175	0
		467.4	0
		467.625	0
		467.85	0
		468.075	0
		468.3	0
		468.525	0
		468.75	0
		468.975	0
		469.2	0
		469.425	0
		469.65	0
		469.875	0
		470.1	0
		470.325	0
		470.55	0
		470.775	0
		471	0
		471.225	0
		471.45	0
		471.675	0
		471.9	0
		472.125	0
		472.35	0
		472.575	0
		472.8	0
		473.025	0
		473.25	0
		473.475	0
		473.7	0
		473.925	0
		474.15	0
		474.375	0
		474.6	0
		474.825	0
		475.05	0
		475.275	0
		475.5	0
		475.725	0
		475.95	0
		476.175	0
		476.4	0
		476.625	0
		476.85	0
		477.075	0
		477.3	0
		477.525	0
		477.75	0
		477.975	0
		478.2	0
		478.425	0
		478.65	0
		478.875	0
		479.1	0
		479.325	0
		479.55	0
		479.775	0
		480	0
		480.225	0
		480.45	0
		480.675	0
		480.9	0
		481.125	0
		481.35	0
		481.575	0
		481.8	0
		482.025	0
		482.25	0
		482.475	0
		482.7	0
		482.925	0
		483.15	0
		483.375	0
		483.6	0
		483.825	0
		484.05	0
		484.275	0
		484.5	0
		484.725	0
		484.95	0
		485.175	0
		485.4	0
		485.625	0
		485.85	0
		486.075	0
		486.3	0
		486.525	0
		486.75	0
		486.975	0
		487.2	0
		487.425	0
		487.65	0
		487.875	0
		488.1	0
		488.325	0
		488.55	0
		488.775	0
		489	0
		489.225	0
		489.45	0
		489.675	0
		489.9	0
		490.125	0
		490.35	0
		490.575	0
		490.8	0
		491.025	0
		491.25	0
		491.475	0
		491.7	0
		491.925	0
		492.15	0
		492.375	0
		492.6	0
		492.825	0
		493.05	0
		493.275	0
		493.5	0
		493.725	0
		493.95	0
		494.175	0
		494.4	0
		494.625	0
		494.85	0
		495.075	0
		495.3	0
		495.525	0
		495.75	0
		495.975	0
		496.2	0
		496.425	0
		496.65	0
		496.875	0
		497.1	0
		497.325	0
		497.55	0
		497.775	0
		498	0
		498.225	0
		498.45	0
		498.675	0
		498.9	0
		499.125	0
		499.35	0
		499.575	0
		499.8	0
		500.025	0
		500.25	0
		500.475	0
		500.7	0
		500.925	0
		501.15	0
		501.375	0
		501.6	0
		501.825	0
		502.05	0
		502.275	0
		502.5	0
		502.725	0
		502.95	0
		503.175	0
		503.4	0
		503.625	0
		503.85	0
		504.075	0
		504.3	0
		504.525	0
		504.75	0
		504.975	0
		505.2	0
		505.425	0
		505.65	0
		505.875	0
		506.1	0
		506.325	0
		506.55	0
		506.775	0
		507	0
		507.225	0
		507.45	0
		507.675	0
		507.9	0
		508.125	0
		508.35	0
		508.575	0
		508.8	0
		509.025	0
		509.25	0
		509.475	0
		509.7	0
		509.925	0
		510.15	0
		510.375	0
		510.6	0
		510.825	0
		511.05	0
		511.275	0
		511.5	0
		511.725	0
		511.95	0
		512.175	0
		512.4	0
		512.625	0
		512.85	0
		513.075	0
		513.3	0
		513.525	0
		513.75	0
		513.975	0
		514.2	0
		514.425	0
		514.65	0
		514.875	0
		515.1	0
		515.325	0
		515.55	0
		515.775	0
		516	0
		516.225	0
		516.45	0
		516.675	0
		516.9	0
		517.125	0
		517.35	0
		517.575	0
		517.8	0
		518.025	0
		518.25	0
		518.475	0
		518.7	0
		518.925	0
		519.15	0
		519.375	0
		519.6	0
		519.825	0
		520.05	0
		520.275	0
		520.5	0
		520.725	0
		520.95	0
		521.175	0
		521.4	0
		521.625	0
		521.85	0
		522.075	0
		522.3	0
		522.525	0
		522.75	0
		522.975	0
		523.2	0
		523.425	0
		523.65	0
		523.875	0
		524.1	0
		524.325	0
		524.55	0
		524.775	0
		525	0
		525.225	0
		525.45	0
		525.675	0
		525.9	0
		526.125	0
		526.35	0
		526.575	0
		526.8	0
		527.025	0
		527.25	0
		527.475	0
		527.7	0
		527.925	0
		528.15	0
		528.375	0
		528.6	0
		528.825	0
		529.05	0
		529.275	0
		529.5	0
		529.725	0
		529.95	0
		530.175	0
		530.4	0
		530.625	0
		530.85	0
		531.075	0
		531.3	0
		531.525	0
		531.75	0
		531.975	0
		532.2	0
		532.425	0
		532.65	0
		532.875	0
		533.1	0
		533.325	0
		533.55	0
		533.775	0
		534	0
		534.225	0
		534.45	0
		534.675	0
		534.9	0
		535.125	0
		535.35	0
		535.575	0
		535.8	0
		536.025	0
		536.25	0
		536.475	0
		536.7	0
		536.925	0
		537.15	0
		537.375	0
		537.6	0
		537.825	0
		538.05	0
		538.275	0
		538.5	0
		538.725	0
		538.95	0
		539.175	0
		539.4	0
		539.625	0
		539.85	0
		540.075	0
		540.3	0
		540.525	0
		540.75	0
		540.975	0
		541.2	0
		541.425	0
		541.65	0
		541.875	0
		542.1	0
		542.325	0
		542.55	0
		542.775	0
		543	0
		543.225	0
		543.45	0
		543.675	0
		543.9	0
		544.125	0
		544.35	0
		544.575	0
		544.8	0
		545.025	0
		545.25	0
		545.475	0
		545.7	0
		545.925	0
		546.15	0
		546.375	0
		546.6	0
		546.825	0
		547.05	0
		547.275	0
		547.5	0
		547.725	0
		547.95	0
		548.175	0
		548.4	0
		548.625	0
		548.85	0
		549.075	0
		549.3	0
		549.525	0
		549.75	0
		549.975	0
		550.2	0
		550.425	0
		550.65	0
		550.875	0
		551.1	0
		551.325	0
		551.55	0
		551.775	0
		552	0
		552.225	0
		552.45	0
		552.675	0
		552.9	0
		553.125	0
		553.35	0
		553.575	0
		553.8	0
		554.025	0
		554.25	0
		554.475	0
		554.7	0
		554.925	0
		555.15	0
		555.375	0
		555.6	0
		555.825	0
		556.05	0
		556.275	0
		556.5	0
		556.725	0
		556.95	0
		557.175	0
		557.4	0
		557.625	0
		557.85	0
		558.075	0
		558.3	0
		558.525	0
		558.75	0
		558.975	0
		559.2	0
		559.425	0
		559.65	0
		559.875	0
		560.1	0
		560.325	0
		560.55	0
		560.775	0
		561	0
		561.225	0
		561.45	0
		561.675	0
		561.9	0
		562.125	0
		562.35	0
		562.575	0
		562.8	0
		563.025	0
		563.25	0
		563.475	0
		563.7	0
		563.925	0
		564.15	0
		564.375	0
		564.6	0
		564.825	0
		565.05	0
		565.275	0
		565.5	0
		565.725	0
		565.95	0
		566.175	0
		566.4	0
		566.625	0
		566.85	0
		567.075	0
		567.3	0
		567.525	0
		567.75	0
		567.975	0
		568.2	0
		568.425	0
		568.65	0
		568.875	0
		569.1	0
		569.325	0
		569.55	0
		569.775	0
		570	0
		570.225	0
		570.45	0
		570.675	0
		570.9	0
		571.125	0
		571.35	0
		571.575	0
		571.8	0
		572.025	0
		572.25	0
		572.475	1.78657e-08
		572.7	1.94234e-08
		572.925	2.11099e-08
		573.15	2.2935e-08
		573.375	2.49094e-08
		573.6	2.70448e-08
		573.825	2.93532e-08
		574.05	3.1848e-08
		574.275	3.45431e-08
		574.5	3.74537e-08
		574.725	4.05958e-08
		574.95	4.39866e-08
		575.175	4.76446e-08
		575.4	5.15893e-08
		575.625	5.58418e-08
		575.85	6.04244e-08
		576.075	6.5361e-08
		576.3	7.06771e-08
		576.525	7.63997e-08
		576.75	8.25578e-08
		576.975	8.91822e-08
		577.2	9.63055e-08
		577.425	1.03963e-07
		577.65	1.12191e-07
		577.875	1.21029e-07
		578.1	1.3052e-07
		578.325	1.40708e-07
		578.55	1.51639e-07
		578.775	1.63365e-07
		579	1.75937e-07
		579.225	1.89414e-07
		579.45	2.03854e-07
		579.675	2.1932e-07
		579.9	2.35881e-07
		580.125	2.53606e-07
		580.35	2.72571e-07
		580.575	2.92856e-07
		580.8	3.14543e-07
		581.025	3.37723e-07
		581.25	3.62489e-07
		581.475	3.8894e-07
		581.7	4.17179e-07
		581.925	4.47318e-07
		582.15	4.79473e-07
		582.375	5.13765e-07
		582.6	5.50324e-07
		582.825	5.89286e-07
		583.05	6.30793e-07
		583.275	6.74995e-07
		583.5	7.22051e-07
		583.725	7.72127e-07
		583.95	8.25398e-07
		584.175	8.82045e-07
		584.4	9.42262e-07
		584.625	1.00625e-06
		584.85	1.07422e-06
		585.075	1.1464e-06
		585.3	1.22301e-06
		585.525	1.3043e-06
		585.75	1.39052e-06
		585.975	1.48195e-06
		586.2	1.57885e-06
		586.425	1.68152e-06
		586.65	1.79026e-06
		586.875	1.90539e-06
		587.1	2.02724e-06
		587.325	2.15615e-06
		587.55	2.29249e-06
		587.775	2.43663e-06
		588	2.58895e-06
		588.225	2.74987e-06
		588.45	2.9198e-06
		588.675	3.09919e-06
		588.9	3.28849e-06
		589.125	3.48818e-06
		589.35	3.69874e-06
		589.575	3.92068e-06
		589.8	4.17304e-06
		590.025	4.42063e-06
		590.25	4.68133e-06
		590.475	4.95575e-06
		590.7	5.24448e-06
		590.925	5.54816e-06
		591.15	5.86745e-06
		591.375	6.20303e-06
		591.6	6.5556e-06
		591.825	6.92587e-06
		592.05	7.31459e-06
		592.275	7.72254e-06
		592.5	8.15048e-06
		592.725	8.59925e-06
		592.95	9.06968e-06
		593.175	9.56262e-06
		593.4	1.0079e-05
		593.625	1.06196e-05
		593.85	1.11855e-05
		594.075	1.17776e-05
		594.3	1.23968e-05
		594.525	1.30443e-05
		594.75	1.37209e-05
		594.975	1.44277e-05
		595.2	1.51659e-05
		595.425	1.59555e-05
		595.65	1.67616e-05
		595.875	1.76024e-05
		596.1	1.84794e-05
		596.325	1.93935e-05
		596.55	2.03461e-05
		596.775	2.13384e-05
		597	2.23716e-05
		597.225	2.34471e-05
		597.45	2.45661e-05
		597.675	2.57299e-05
		597.9	2.694e-05
		598.125	2.81976e-05
		598.35	2.95042e-05
		598.575	3.0861e-05
		598.8	3.22696e-05
		599.025	3.37313e-05
		599.25	3.52475e-05
		599.475	3.68198e-05
		599.7	3.84495e-05
		599.925	4.01381e-05
		600.15	4.18871e-05
		600.375	4.36979e-05
		600.6	4.55719e-05
		600.825	4.75108e-05
		601.05	4.95159e-05
		601.275	5.15886e-05
		601.5	5.37306e-05
		601.725	5.59432e-05
		601.95	5.82279e-05
		602.175	6.05861e-05
		602.4	6.30193e-05
		602.625	6.55288e-05
		602.85	6.81162e-05
		603.075	7.07827e-05
		603.3	7.35297e-05
		603.525	7.63587e-05
		603.75	7.92709e-05
		603.975	8.22676e-05
		604.2	8.53501e-05
		604.425	8.85196e-05
		604.65	9.17773e-05
		604.875	9.51244e-05
		605.1	9.85621e-05
		605.325	0.000102091
		605.55	0.000105713
		605.775	0.000109429
		606	0.000113239
		606.225	0.000117145
		606.45	0.000121148
		606.675	0.000125247
		606.9	0.000129445
		607.125	0.000133741
		607.35	0.000138137
		607.575	0.000142633
		607.8	0.000147229
		608.025	0.000151926
		608.25	0.000156725
		608.475	0.000161625
		608.7	0.000166628
		608.925	0.000171732
		609.15	0.000176939
		609.375	0.000182248
		609.6	0.000187659
		609.825	0.000193173
		610.05	0.000198789
		610.275	0.000204507
		610.5	0.000210327
		610.725	0.000216247
		610.95	0.000222269
		611.175	0.00022839
		611.4	0.000234612
		611.625	0.000240932
		611.85	0.000247351
		612.075	0.000253867
		612.3	0.00026048
		612.525	0.000267188
		612.75	0.000273991
		612.975	0.000280888
		613.2	0.000287877
		613.425	0.000294957
		613.65	0.000302127
		613.875	0.000309386
		614.1	0.000316731
		614.325	0.000324163
		614.55	0.000331678
		614.775	0.000339276
		615	0.000346955
		615.225	0.000354714
		615.45	0.00036255
		615.675	0.000370462
		615.9	0.000378448
		616.125	0.000386506
		616.35	0.000394634
		616.575	0.000402831
		616.8	0.000411095
		617.025	0.000419423
		617.25	0.000427814
		617.475	0.000436265
		617.7	0.000444775
		617.925	0.000453342
		618.15	0.000461963
		618.375	0.000470637
		618.6	0.000479361
		618.825	0.000488134
		619.05	0.000496953
		619.275	0.000505816
		619.5	0.000514721
		619.725	0.000523667
		619.95	0.000532651
		620.175	0.00054167
		620.4	0.000550724
		620.625	0.00055981
		620.85	0.000568927
		621.075	0.000578071
		621.3	0.000587241
		621.525	0.000596436
		621.75	0.000605653
		621.975	0.00061489
		622.2	0.000624146
		622.425	0.000633418
		622.65	0.000642705
		622.875	0.000652005
		623.1	0.000661316
		623.325	0.000670636
		623.55	0.000679963
		623.775	0.000689296
		624	0.000698633
		624.225	0.000707973
		624.45	0.000717312
		624.675	0.00072665
		624.9	0.000735984
		625.125	0.000745314
		625.35	0.000754637
		625.575	0.000763951
		625.8	0.000773255
		626.025	0.000782546
		626.25	0.000791824
		626.475	0.000801086
		626.7	0.000810329
		626.925	0.000819553
		627.15	0.000828756
		627.375	0.000837934
		627.6	0.000847087
		627.825	0.000856212
		628.05	0.000865307
		628.275	0.00087437
		628.5	0.000883398
		628.725	0.00089239
		628.95	0.000901342
		629.175	0.000910253
		629.4	0.00091912
		629.625	0.00092794
		629.85	0.000936711
		630.075	0.000945429
		630.3	0.000954092
		630.525	0.000962698
		630.75	0.000971242
		630.975	0.000979722
		631.2	0.000988135
		631.425	0.000996478
		631.65	0.00100475
		631.875	0.00101294
		632.1	0.00102105
		632.325	0.00102907
		632.55	0.00103701
		632.775	0.00104485
		633	0.0010526
		633.225	0.00106025
		633.45	0.00106779
		633.675	0.00107522
		633.9	0.00108254
		634.125	0.00108975
		634.35	0.00109683
		634.575	0.00110379
		634.8	0.00111061
		635.025	0.00111731
		635.25	0.00112386
		635.475	0.00113027
		635.7	0.00113652
		635.925	0.00114263
		636.15	0.00114858
		636.375	0.00115436
		636.6	0.00115998
		636.825	0.00116542
		637.05	0.00117069
		637.275	0.00117577
		637.5	0.00118067
		637.725	0.00118538
		637.95	0.0011899
		638.175	0.00119421
		638.4	0.00119833
		638.625	0.00120223
		638.85	0.00120592
		639.075	0.0012094
		639.3	0.00121266
		639.525	0.00121569
		639.75	0.0012185
		639.975	0.00122108
		640.2	0.00122342
		640.425	0.00122553
		640.65	0.0012274
		640.875	0.00122903
		641.1	0.00123041
		641.325	0.00123154
		641.55	0.00123243
		641.775	0.00123307
		642	0.00123345
		642.225	0.00123358
		642.45	0.00123346
		642.675	0.00123308
		642.9	0.00123244
		643.125	0.00123155
		643.35	0.0012304
		643.575	0.001229
		643.8	0.00122734
		644.025	0.00122542
		644.25	0.00122325
		644.475	0.00122083
		644.7	0.00121816
		644.925	0.00121523
		645.15	0.00121206
		645.375	0.00120864
		645.6	0.00120498
		645.825	0.00120108
		646.05	0.00119694
		646.275	0.00119257
		646.5	0.00118797
		646.725	0.00118314
		646.95	0.00117809
		647.175	0.00117283
		647.4	0.00116734
		647.625	0.00116165
		647.85	0.00115576
		648.075	0.00114966
		648.3	0.00114337
		648.525	0.0011369
		648.75	0.00113024
		648.975	0.0011234
		649.2	0.00111639
		649.425	0.00110921
		649.65	0.00110188
		649.875	0.00109439
		650.1	0.00108675
		650.325	0.00107898
		650.55	0.00107106
		650.775	0.00106302
		651	0.00105486
		651.225	0.00104659
		651.45	0.0010382
		651.675	0.00102971
		651.9	0.00102113
		652.125	0.00101246
		652.35	0.0010037
		652.575	0.000994867
		652.8	0.000985964
		653.025	0.000976998
		653.25	0.000967974
		653.475	0.000958898
		653.7	0.000949778
		653.925	0.000940618
		654.15	0.000931424
		654.375	0.000922202
		654.6	0.000912959
		654.825	0.000903698
		655.05	0.000894426
		655.275	0.000885148
		655.5	0.000875869
		655.725	0.000866593
		655.95	0.000857326
		656.175	0.000848072
		656.4	0.000838835
		656.625	0.00082962
		656.85	0.00082043
		657.075	0.000811269
		657.3	0.000802142
		657.525	0.000793052
		657.75	0.000784001
		657.975	0.000774993
		658.2	0.000766032
		658.425	0.000757119
		658.65	0.000748258
		658.875	0.000739451
		659.1	0.000730699
		659.325	0.000722006
		659.55	0.000713373
		659.775	0.000704802
		660	0.000696294
		660.225	0.000687851
		660.45	0.000679474
		660.675	0.000671164
		660.9	0.000662922
		661.125	0.000654749
		661.35	0.000646646
		661.575	0.000638613
		661.8	0.000630651
		662.025	0.000622759
		662.25	0.000614938
		662.475	0.000607189
		662.7	0.000599511
		662.925	0.000591903
		663.15	0.000584367
		663.375	0.000576901
		663.6	0.000569505
		663.825	0.000562178
		664.05	0.000554921
		664.275	0.000547732
		664.5	0.000540612
		664.725	0.000533558
		664.95	0.000526571
		665.175	0.000519649
		665.4	0.000512792
		665.625	0.000506
		665.85	0.00049927
		666.075	0.000492603
		666.3	0.000485996
		666.525	0.000479451
		666.75	0.000472965
		666.975	0.000466537
		667.2	0.000460167
		667.425	0.000453854
		667.65	0.000447597
		667.875	0.000441395
		668.1	0.000435246
		668.325	0.000429151
		668.55	0.000423109
		668.775	0.000417118
		669	0.000411178
		669.225	0.000405287
		669.45	0.000399446
		669.675	0.000393654
		669.9	0.00038791
		670.125	0.000382213
		670.35	0.000376562
		670.575	0.000370958
		670.8	0.000365399
		671.025	0.000359886
		671.25	0.000354417
		671.475	0.000348992
		671.7	0.000343611
		671.925	0.000338274
		672.15	0.00033298
		672.375	0.000327729
		672.6	0.000322521
		672.825	0.000317355
		673.05	0.000312232
		673.275	0.000307151
		673.5	0.000302112
		673.725	0.000297115
		673.95	0.00029216
		674.175	0.000287248
		674.4	0.000282377
		674.625	0.000277548
		674.85	0.000272762
		675.075	0.000268018
		675.3	0.000263316
		675.525	0.000258656
		675.75	0.00025404
		675.975	0.000249466
		676.2	0.000244935
		676.425	0.000240447
		676.65	0.000236003
		676.875	0.000231602
		677.1	0.000227246
		677.325	0.000222933
		677.55	0.000218665
		677.775	0.000214441
		678	0.000210262
		678.225	0.000206128
		678.45	0.00020204
		678.675	0.000197997
		678.9	0.000193999
		679.125	0.000190048
		679.35	0.000186143
		679.575	0.000182285
		679.8	0.000178473
		680.025	0.000174709
		680.25	0.000170991
		680.475	0.000167321
		680.7	0.000163698
		680.925	0.000160123
		681.15	0.000156596
		681.375	0.000153117
		681.6	0.000149686
		681.825	0.000146303
		682.05	0.000142969
		682.275	0.000139682
		682.5	0.000136445
		682.725	0.000133255
		682.95	0.000130114
		683.175	0.000127022
		683.4	0.000123978
		683.625	0.000120983
		683.85	0.000118036
		684.075	0.000115137
		684.3	0.00011227
		684.525	0.000109469
		684.75	0.000106716
		684.975	0.00010401
		685.2	0.000101353
		685.425	9.87423e-05
		685.65	9.61792e-05
		685.875	9.3663e-05
		686.1	9.11937e-05
		686.325	8.87709e-05
		686.55	8.63943e-05
		686.775	8.40637e-05
		687	8.17787e-05
		687.225	7.95391e-05
		687.45	7.73445e-05
		687.675	7.51946e-05
		687.9	7.30889e-05
		688.125	7.10272e-05
		688.35	6.90089e-05
		688.575	6.70338e-05
		688.8	6.51013e-05
		689.025	6.32111e-05
		689.25	6.13627e-05
		689.475	5.95556e-05
		689.7	5.77894e-05
		689.925	5.60636e-05
		690.15	5.43776e-05
		690.375	5.27311e-05
		690.6	5.11235e-05
		690.825	4.95542e-05
		691.05	4.80228e-05
		691.275	4.65287e-05
		691.5	4.50715e-05
		691.725	4.36504e-05
		691.95	4.22651e-05
		692.175	4.09149e-05
		692.4	3.95994e-05
		692.625	3.8301e-05
		692.85	3.70545e-05
		693.075	3.58408e-05
		693.3	3.46593e-05
		693.525	3.35095e-05
		693.75	3.23907e-05
		693.975	3.13025e-05
		694.2	3.02443e-05
		694.425	2.92155e-05
		694.65	2.82156e-05
		694.875	2.7244e-05
		695.1	2.63001e-05
		695.325	2.53834e-05
		695.55	2.44933e-05
		695.775	2.36293e-05
		696	2.27908e-05
		696.225	2.19773e-05
		696.45	2.11882e-05
		696.675	2.0423e-05
		696.9	1.96812e-05
		697.125	1.89621e-05
		697.35	1.82654e-05
		697.575	1.75905e-05
		697.8	1.69368e-05
		698.025	1.63039e-05
		698.25	1.56911e-05
		698.475	1.50982e-05
		698.7	1.45245e-05
		698.925	1.39695e-05
		699.15	1.34329e-05
		699.375	1.2914e-05
		699.6	1.24125e-05
		699.825	1.19279e-05
		700.05	1.14597e-05
		700.275	1.10074e-05
		700.5	1.05708e-05
		700.725	1.01492e-05
		700.95	9.74235e-06
		701.175	9.34976e-06
		701.4	8.97105e-06
		701.625	8.6058e-06
		701.85	8.25362e-06
		702.075	7.91414e-06
		702.3	7.58697e-06
		702.525	7.27175e-06
		702.75	6.96811e-06
		702.975	6.67569e-06
		703.2	6.39416e-06
		703.425	6.12316e-06
		703.65	5.86238e-06
		703.875	5.61148e-06
		704.1	5.37016e-06
		704.325	5.13809e-06
		704.55	4.91498e-06
		704.775	4.70054e-06
		705	4.49448e-06
		705.225	4.29652e-06
		705.45	4.10638e-06
		705.675	3.92381e-06
		705.9	3.74853e-06
		706.125	3.58031e-06
		706.35	3.41889e-06
		706.575	3.26404e-06
		706.8	3.11553e-06
		707.025	2.97313e-06
		707.25	2.83662e-06
		707.475	2.70579e-06
		707.7	2.58043e-06
		707.925	2.46034e-06
		708.15	2.34534e-06
		708.375	2.23522e-06
		708.6	2.12981e-06
		708.825	2.02893e-06
		709.05	1.93241e-06
		709.275	1.84008e-06
		709.5	1.75178e-06
		709.725	1.66735e-06
		709.95	1.58665e-06
		710.175	1.50953e-06
		710.4	1.43584e-06
		710.625	1.36545e-06
		710.85	1.29823e-06
		711.075	1.23405e-06
		711.3	1.17279e-06
		711.525	1.11433e-06
		711.75	1.05855e-06
		711.975	1.00535e-06
		712.2	9.54612e-07
		712.425	9.06237e-07
		712.65	8.60127e-07
		712.875	8.16186e-07
		713.1	7.74321e-07
		713.325	7.34443e-07
		713.55	6.96468e-07
		713.775	6.60313e-07
		714	6.25899e-07
		714.225	5.93149e-07
		714.45	5.6199e-07
		714.675	5.32353e-07
		714.9	5.04169e-07
		715.125	4.77373e-07
		715.35	4.51903e-07
		715.575	4.27699e-07
		715.8	4.04704e-07
		716.025	3.82861e-07
		716.25	3.62119e-07
		716.475	3.42426e-07
		716.7	3.23733e-07
		716.925	3.05995e-07
		717.15	2.89165e-07
		717.375	2.73202e-07
		717.6	2.58064e-07
		717.825	2.43711e-07
		718.05	2.30107e-07
		718.275	2.17215e-07
		718.5	2.05001e-07
		718.725	1.93431e-07
		718.95	1.82475e-07
		719.175	1.72102e-07
		719.4	1.62283e-07
		719.625	1.52991e-07
		719.85	1.442e-07
		720.075	1.35884e-07
		720.3	1.2802e-07
		720.525	1.20585e-07
		720.75	1.13557e-07
		720.975	1.06916e-07
		721.2	1.00641e-07
		721.425	9.47136e-08
		721.65	8.9116e-08
		721.875	8.3831e-08
		722.1	7.88422e-08
		722.325	7.41343e-08
		722.55	6.96923e-08
		722.775	6.55022e-08
		723	6.15506e-08
		723.225	5.78249e-08
		723.45	5.43129e-08
		723.675	5.1003e-08
		723.9	4.78845e-08
		724.125	4.49469e-08
		724.35	4.21803e-08
		724.575	3.95754e-08
		724.8	3.71233e-08
		725.025	3.48156e-08
		725.25	3.26442e-08
		725.475	3.06016e-08
		725.7	2.86805e-08
		725.925	2.68743e-08
		726.15	2.51763e-08
		726.375	2.35804e-08
		726.6	2.20809e-08
		726.825	2.06723e-08
		727.05	1.93493e-08
		727.275	1.81071e-08
		727.5	0
		727.725	0
		727.95	0
		728.175	0
		728.4	0
		728.625	0
		728.85	0
		729.075	0
		729.3	0
		729.525	0
		729.75	0
		729.975	0
		730.2	0
		730.425	0
		730.65	0
		730.875	0
		731.1	0
		731.325	0
		731.55	0
		731.775	0
		732	0
		732.225	0
		732.45	0
		732.675	0
		732.9	0
		733.125	0
		733.35	0
		733.575	0
		733.8	0
		734.025	0
		734.25	0
		734.475	0
		734.7	0
		734.925	0
		735.15	0
		735.375	0
		735.6	0
		735.825	0
		736.05	0
		736.275	0
		736.5	0
		736.725	0
		736.95	0
		737.175	0
		737.4	0
		737.625	0
		737.85	0
		738.075	0
		738.3	0
		738.525	0
		738.75	0
		738.975	0
		739.2	0
		739.425	0
		739.65	0
		739.875	0
		740.1	0
		740.325	0
		740.55	0
		740.775	0
		741	0
		741.225	0
		741.45	0
		741.675	0
		741.9	0
		742.125	0
		742.35	0
		742.575	0
		742.8	0
		743.025	0
		743.25	0
		743.475	0
		743.7	0
		743.925	0
		744.15	0
		744.375	0
		744.6	0
		744.825	0
		745.05	0
		745.275	0
		745.5	0
		745.725	0
		745.95	0
		746.175	0
		746.4	0
		746.625	0
		746.85	0
		747.075	0
		747.3	0
		747.525	0
		747.75	0
		747.975	0
		748.2	0
		748.425	0
		748.65	0
		748.875	0
		749.1	0
		749.325	0
		749.55	0
		749.775	0
[truncated: 1 more rows]

## Sheet: PlotDat6
Source sheet	data	300	1.28954e-05
Plot name	ProbDens6	300.055	1.33102e-05
Plot Type	16	300.11	1.37372e-05
1st free col	5	300.165	1.41768e-05
Sigma Level	2	300.22	1.46293e-05
Absolute Errs	TRUE	300.275	1.50951e-05
Symbol Type	5	300.33	1.55746e-05
Inverse Plot	FALSE	300.385	1.60679e-05
Color Plot	FALSE	300.44	1.65757e-05
3D plot	FALSE	300.495	1.70981e-05
Linear	FALSE	300.55	1.76356e-05
Data Range	AD337:AE412	300.605	1.81886e-05
Filled Symbols	TRUE	300.66	1.87575e-05
ConcAge	FALSE	300.715	1.93427e-05
ConcSwap	FALSE	300.77	1.99578e-05
1st Symbol-row	1	300.825	2.05772e-05
		300.88	2.12141e-05
		300.935	2.1869e-05
		300.99	2.25425e-05
		301.045	2.32348e-05
		301.1	2.39466e-05
		301.155	2.46782e-05
		301.21	2.54303e-05
		301.265	2.62032e-05
		301.32	2.69976e-05
		301.375	2.78139e-05
		301.43	2.86526e-05
		301.485	2.95144e-05
		301.54	3.03997e-05
		301.595	3.13092e-05
		301.65	3.22434e-05
		301.705	3.32029e-05
		301.76	3.41884e-05
		301.815	3.52003e-05
		301.87	3.62395e-05
		301.925	3.73064e-05
		301.98	3.84018e-05
		302.035	3.95398e-05
		302.09	4.06947e-05
		302.145	4.188e-05
		302.2	4.30966e-05
		302.255	4.4345e-05
		302.31	4.56261e-05
		302.365	4.69406e-05
		302.42	4.82893e-05
		302.475	4.96728e-05
		302.53	5.10921e-05
		302.585	5.25478e-05
		302.64	5.40409e-05
		302.695	5.55721e-05
		302.75	5.71422e-05
		302.805	5.87521e-05
		302.86	6.04028e-05
		302.915	6.2095e-05
		302.97	6.38296e-05
		303.025	6.56076e-05
		303.08	6.74299e-05
		303.135	6.92974e-05
		303.19	7.12112e-05
		303.245	7.3172e-05
		303.3	7.5181e-05
		303.355	7.72392e-05
		303.41	7.93474e-05
		303.465	8.15069e-05
		303.52	8.37186e-05
		303.575	8.59835e-05
		303.63	8.83028e-05
		303.685	9.06775e-05
		303.74	9.31221e-05
		303.795	9.56115e-05
		303.85	9.81597e-05
		303.905	0.000100768
		303.96	0.000103437
		304.015	0.000106169
		304.07	0.000108964
		304.125	0.000111824
		304.18	0.000114763
		304.235	0.000117756
		304.29	0.000120832
		304.345	0.000123964
		304.4	0.000127167
		304.455	0.000130443
		304.51	0.000133792
		304.565	0.000137216
		304.62	0.000140716
		304.675	0.000144294
		304.73	0.000147951
		304.785	0.000151689
		304.84	0.000155508
		304.895	0.000159411
		304.95	0.000163398
		305.005	0.000167471
		305.06	0.000171632
		305.115	0.000175881
		305.17	0.000180221
		305.225	0.000184653
		305.28	0.000189179
		305.335	0.000193799
		305.39	0.000198515
		305.445	0.00020333
		305.5	0.000208244
		305.555	0.000213259
		305.61	0.000218376
		305.665	0.000223598
		305.72	0.000228939
		305.775	0.000234387
		305.83	0.000239932
		305.885	0.000245587
		305.94	0.000251354
		305.995	0.000257234
		306.05	0.00026323
		306.105	0.000269343
		306.16	0.000275574
		306.215	0.000281938
		306.27	0.000288411
		306.325	0.000295007
		306.38	0.000301728
		306.435	0.000308576
		306.49	0.000315551
		306.545	0.00032267
		306.6	0.00032992
		306.655	0.00033729
		306.71	0.000344795
		306.765	0.000352435
		306.82	0.000360213
		306.875	0.000368131
		306.93	0.000376189
		306.985	0.000384389
		307.04	0.000392733
		307.095	0.000401223
		307.15	0.000409859
		307.205	0.000418644
		307.26	0.000427578
		307.315	0.000436664
		307.37	0.000445902
		307.425	0.000455295
		307.48	0.000464844
		307.535	0.000474549
		307.59	0.000484413
		307.645	0.000494436
		307.7	0.000504621
		307.755	0.000514968
		307.81	0.000525478
		307.865	0.000536167
		307.92	0.000547009
		307.975	0.000558032
		308.03	0.000569224
		308.085	0.000580572
		308.14	0.000592091
		308.195	0.000603782
		308.25	0.000615646
		308.305	0.000627684
		308.36	0.000639896
		308.415	0.000652284
		308.47	0.000664849
		308.525	0.000677592
		308.58	0.000690513
		308.635	0.000703612
		308.69	0.000716892
		308.745	0.000730352
		308.8	0.000743992
		308.855	0.000757815
		308.91	0.000771819
		308.965	0.000786006
		309.02	0.000800376
		309.075	0.000814929
		309.13	0.000829665
		309.185	0.000844586
		309.24	0.00085969
		309.295	0.000874978
		309.35	0.000890451
		309.405	0.000906108
		309.46	0.000921948
		309.515	0.000937986
		309.57	0.000954195
		309.625	0.000970587
		309.68	0.000987163
		309.735	0.00100392
		309.79	0.00102086
		309.845	0.00103798
		309.9	0.00105529
		309.955	0.00107277
		310.01	0.00109043
		310.065	0.00110828
		310.12	0.00112631
		310.175	0.00114451
		310.23	0.00116288
		310.285	0.00118143
		310.34	0.00120016
		310.395	0.00121905
		310.45	0.00123812
		310.505	0.00125735
		310.56	0.00127676
		310.615	0.00129634
		310.67	0.00131608
		310.725	0.00133597
		310.78	0.00135605
		310.835	0.00137627
		310.89	0.00139664
		310.945	0.00141718
		311	0.00143786
		311.055	0.00145871
		311.11	0.0014797
		311.165	0.00150083
		311.22	0.0015221
		311.275	0.00154352
		311.33	0.00156507
		311.385	0.00158676
		311.44	0.00160859
		311.495	0.00163056
		311.55	0.00165264
		311.605	0.00167484
		311.66	0.00169717
		311.715	0.00171961
		311.77	0.00174217
		311.825	0.00176484
		311.88	0.00178764
		311.935	0.00181052
		311.99	0.0018335
		312.045	0.00185659
		312.1	0.00187976
		312.155	0.00190303
		312.21	0.00192638
		312.265	0.00194981
		312.32	0.00197333
		312.375	0.00199693
		312.43	0.00202059
		312.485	0.00204431
		312.54	0.0020681
		312.595	0.00209194
		312.65	0.00211586
		312.705	0.00213981
		312.76	0.0021638
		312.815	0.00218784
		312.87	0.00221191
		312.925	0.00223602
		312.98	0.00226015
		313.035	0.0022843
		313.09	0.00230848
		313.145	0.00233268
		313.2	0.00235688
		313.255	0.00238108
		313.31	0.00240528
		313.365	0.00242948
		313.42	0.00245368
		313.475	0.00247786
		313.53	0.00250202
		313.585	0.00252616
		313.64	0.00255026
		313.695	0.00257434
		313.75	0.00259838
		313.805	0.00262237
		313.86	0.00264632
		313.915	0.00267022
		313.97	0.00269407
		314.025	0.00271785
		314.08	0.00274157
		314.135	0.00276522
		314.19	0.0027888
		314.245	0.0028123
		314.3	0.00283571
		314.355	0.00285904
		314.41	0.00288228
		314.465	0.00290545
		314.52	0.00292849
		314.575	0.00295143
		314.63	0.00297427
		314.685	0.00299699
		314.74	0.00301959
		314.795	0.00304207
		314.85	0.00306444
		314.905	0.00308667
		314.96	0.00310877
		315.015	0.00313074
		315.07	0.00315257
		315.125	0.00317426
		315.18	0.0031958
		315.235	0.00321719
		315.29	0.00323844
		315.345	0.00325953
		315.4	0.00328046
		315.455	0.00330123
		315.51	0.00332184
		315.565	0.00334229
		315.62	0.00336258
		315.675	0.00338269
		315.73	0.00340263
		315.785	0.00342239
		315.84	0.00344197
		315.895	0.00346138
		315.95	0.00348061
		316.005	0.00349966
		316.06	0.00351853
		316.115	0.00353721
		316.17	0.00355571
		316.225	0.00357402
		316.28	0.00359214
		316.335	0.00361008
		316.39	0.00362783
		316.445	0.00364539
		316.5	0.00366277
		316.555	0.00367995
		316.61	0.00369695
		316.665	0.00371376
		316.72	0.00373038
		316.775	0.00374681
		316.83	0.00376306
		316.885	0.00377912
		316.94	0.003795
		316.995	0.00381069
		317.05	0.0038262
		317.105	0.00384153
		317.16	0.00385668
		317.215	0.00387166
		317.27	0.00388647
		317.325	0.0039011
		317.38	0.00391557
		317.435	0.00392987
		317.49	0.00394399
		317.545	0.00395795
		317.6	0.00397175
		317.655	0.00398539
		317.71	0.00399888
		317.765	0.00401222
		317.82	0.00402543
		317.875	0.00403848
		317.93	0.00405139
		317.985	0.00406416
		318.04	0.00407683
		318.095	0.00408935
		318.15	0.00410174
		318.205	0.00411401
		318.26	0.00412618
		318.315	0.00413823
		318.37	0.00415019
		318.425	0.00416204
		318.48	0.00417381
		318.535	0.00418547
		318.59	0.00419706
		318.645	0.00420856
		318.7	0.00421999
		318.755	0.00423136
		318.81	0.00424266
		318.865	0.00425391
		318.92	0.00426511
		318.975	0.00427627
		319.03	0.00428738
		319.085	0.00429848
		319.14	0.00430955
		319.195	0.00432059
		319.25	0.00433162
		319.305	0.00434265
		319.36	0.00435367
		319.415	0.0043647
		319.47	0.00437575
		319.525	0.00438682
		319.58	0.00439791
		319.635	0.00440903
		319.69	0.0044202
		319.745	0.00443141
		319.8	0.00444268
		319.855	0.00445401
		319.91	0.0044654
		319.965	0.00447688
		320.02	0.00448843
		320.075	0.00450006
		320.13	0.00451179
		320.185	0.00452362
		320.24	0.00453556
		320.295	0.00454761
		320.35	0.00455978
		320.405	0.00457208
		320.46	0.00458451
		320.515	0.00459709
		320.57	0.00460981
		320.625	0.00462268
		320.68	0.00463571
		320.735	0.00464891
		320.79	0.00466228
		320.845	0.00467584
		320.9	0.00468957
		320.955	0.00470349
		321.01	0.0047176
		321.065	0.00473192
		321.12	0.00474644
		321.175	0.00476118
		321.23	0.00477614
		321.285	0.00479131
		321.34	0.00480672
		321.395	0.00482236
		321.45	0.00483823
		321.505	0.00485436
		321.56	0.00487074
		321.615	0.00488736
		321.67	0.00490424
		321.725	0.00492138
		321.78	0.00493878
		321.835	0.00495646
		321.89	0.0049744
		321.945	0.00499264
		322	0.00501115
		322.055	0.00502994
		322.11	0.00504901
		322.165	0.00506838
		322.22	0.00508804
		322.275	0.00510799
		322.33	0.00512825
		322.385	0.0051488
		322.44	0.00516966
		322.495	0.00519082
		322.55	0.00521229
		322.605	0.00523406
		322.66	0.00525615
		322.715	0.00527855
		322.77	0.00530126
		322.825	0.00532429
		322.88	0.00534763
		322.935	0.00537128
		322.99	0.00539525
		323.045	0.00541954
		323.1	0.00544414
		323.155	0.00546908
		323.21	0.00549431
		323.265	0.00551986
		323.32	0.00554573
		323.375	0.00557191
		323.43	0.0055984
		323.485	0.00562521
		323.54	0.00565233
		323.595	0.00567976
		323.65	0.00570749
		323.705	0.00573553
		323.76	0.00576388
		323.815	0.00579254
		323.87	0.00582149
		323.925	0.00585074
		323.98	0.00588029
		324.035	0.00591013
		324.09	0.00594027
		324.145	0.00597068
		324.2	0.00600138
		324.255	0.00603237
		324.31	0.00606363
		324.365	0.00609516
		324.42	0.00612697
		324.475	0.00615904
		324.53	0.00619138
		324.585	0.00622398
		324.64	0.00625683
		324.695	0.00628994
		324.75	0.00632329
		324.805	0.00635689
		324.86	0.00639073
		324.915	0.0064248
		324.97	0.0064591
		325.025	0.00649363
		325.08	0.00652838
		325.135	0.00656336
		325.19	0.00659855
		325.245	0.00663393
		325.3	0.00666953
		325.355	0.00670533
		325.41	0.00674132
		325.465	0.00677749
		325.52	0.00681385
		325.575	0.00685038
		325.63	0.00688709
		325.685	0.00692397
		325.74	0.00696101
		325.795	0.00699823
		325.85	0.00703559
		325.905	0.00707309
		325.96	0.00711074
		326.015	0.00714854
		326.07	0.00718646
		326.125	0.00722452
		326.18	0.0072627
		326.235	0.00730101
		326.29	0.00733944
		326.345	0.00737798
		326.4	0.00741662
		326.455	0.00745536
		326.51	0.00749421
		326.565	0.00753314
		326.62	0.00757217
		326.675	0.00761129
		326.73	0.00765049
		326.785	0.00768977
		326.84	0.00772913
		326.895	0.00776856
		326.95	0.00780806
		327.005	0.00784762
		327.06	0.00788724
		327.115	0.00792692
		327.17	0.00796665
		327.225	0.00800644
		327.28	0.00804627
		327.335	0.00808615
		327.39	0.00812608
		327.445	0.00816605
		327.5	0.00820605
		327.555	0.0082461
		327.61	0.00828618
		327.665	0.0083263
		327.72	0.00836644
		327.775	0.00840662
		327.83	0.00844683
		327.885	0.00848707
		327.94	0.00852733
		327.995	0.00856763
		328.05	0.00860794
		328.105	0.00864829
		328.16	0.00868866
		328.215	0.00872905
		328.27	0.00876948
		328.325	0.00880992
		328.38	0.0088504
		328.435	0.0088909
		328.49	0.00893142
		328.545	0.00897198
		328.6	0.00901256
		328.655	0.00905318
		328.71	0.00909383
		328.765	0.00913451
		328.82	0.00917523
		328.875	0.00921598
		328.93	0.00925678
		328.985	0.00929762
		329.04	0.0093385
		329.095	0.00937942
		329.15	0.0094204
		329.205	0.00946143
		329.26	0.00950251
		329.315	0.00954365
		329.37	0.00958486
		329.425	0.00962613
		329.48	0.00966747
		329.535	0.00970888
		329.59	0.00975036
		329.645	0.00979193
		329.7	0.00983358
		329.755	0.00987532
		329.81	0.00991716
		329.865	0.00995909
		329.92	0.0100011
		329.975	0.0100433
		330.03	0.0100855
		330.085	0.0101279
		330.14	0.0101704
		330.195	0.010213
		330.25	0.0102557
		330.305	0.0102986
		330.36	0.0103416
		330.415	0.0103848
		330.47	0.0104281
		330.525	0.0104716
		330.58	0.0105153
		330.635	0.0105591
		330.69	0.0106031
		330.745	0.0106473
		330.8	0.0106917
		330.855	0.0107362
		330.91	0.010781
		330.965	0.0108259
		331.02	0.0108711
		331.075	0.0109165
		331.13	0.0109621
		331.185	0.011008
		331.24	0.011054
		331.295	0.0111003
		331.35	0.0111469
		331.405	0.0111937
		331.46	0.0112408
		331.515	0.0112881
		331.57	0.0113357
		331.625	0.0113836
		331.68	0.0114318
		331.735	0.0114802
		331.79	0.011529
		331.845	0.011578
		331.9	0.0116273
		331.955	0.011677
		332.01	0.0117269
		332.065	0.0117772
		332.12	0.0118278
		332.175	0.0118788
		332.23	0.01193
		332.285	0.0119816
		332.34	0.0120336
		332.395	0.0120859
		332.45	0.0121386
		332.505	0.0121916
		332.56	0.0122449
		332.615	0.0122987
		332.67	0.0123528
		332.725	0.0124073
		332.78	0.0124621
		332.835	0.0125174
		332.89	0.012573
		332.945	0.012629
		333	0.0126854
		333.055	0.0127422
		333.11	0.0127994
		333.165	0.012857
		333.22	0.012915
		333.275	0.0129734
		333.33	0.0130323
		333.385	0.0130915
		333.44	0.0131511
		333.495	0.0132111
		333.55	0.0132716
		333.605	0.0133324
		333.66	0.0133937
		333.715	0.0134554
		333.77	0.0135175
		333.825	0.01358
		333.88	0.0136429
		333.935	0.0137063
		333.99	0.01377
		334.045	0.0138342
		334.1	0.0138987
		334.155	0.0139637
		334.21	0.0140291
		334.265	0.0140948
		334.32	0.014161
		334.375	0.0142276
		334.43	0.0142945
		334.485	0.0143619
		334.54	0.0144296
		334.595	0.0144978
		334.65	0.0145663
		334.705	0.0146351
		334.76	0.0147044
		334.815	0.014774
		334.87	0.0148439
		334.925	0.0149143
		334.98	0.0149849
		335.035	0.0150559
		335.09	0.0151272
		335.145	0.0151989
		335.2	0.0152708
		335.255	0.0153431
		335.31	0.0154157
		335.365	0.0154885
		335.42	0.0155617
		335.475	0.0156351
		335.53	0.0157087
		335.585	0.0157827
		335.64	0.0158568
		335.695	0.0159312
		335.75	0.0160058
		335.805	0.0160806
		335.86	0.0161556
		335.915	0.0162308
		335.97	0.0163062
		336.025	0.0163817
		336.08	0.0164574
		336.135	0.0165332
		336.19	0.0166091
		336.245	0.0166851
		336.3	0.0167612
		336.355	0.0168373
		336.41	0.0169136
		336.465	0.0169898
		336.52	0.0170661
		336.575	0.0171424
		336.63	0.0172187
		336.685	0.0172949
		336.74	0.0173711
		336.795	0.0174473
		336.85	0.0175234
		336.905	0.0175994
		336.96	0.0176752
		337.015	0.017751
		337.07	0.0178266
		337.125	0.017902
		337.18	0.0179772
		337.235	0.0180523
		337.29	0.0181271
		337.345	0.0182016
		337.4	0.0182759
		337.455	0.0183499
		337.51	0.0184236
		337.565	0.018497
		337.62	0.0185701
		337.675	0.0186428
		337.73	0.0187151
		337.785	0.018787
		337.84	0.0188585
		337.895	0.0189295
		337.95	0.0190001
		338.005	0.0190702
		338.06	0.0191398
		338.115	0.0192089
		338.17	0.0192774
		338.225	0.0193454
		338.28	0.0194128
		338.335	0.0194796
		338.39	0.0195458
		338.445	0.0196114
		338.5	0.0196763
		338.555	0.0197405
		338.61	0.0198041
		338.665	0.0198669
		338.72	0.019929
		338.775	0.0199904
		338.83	0.020051
		338.885	0.0201109
		338.94	0.0201699
		338.995	0.0202282
		339.05	0.0202856
		339.105	0.0203422
		339.16	0.020398
		339.215	0.0204528
		339.27	0.0205068
		339.325	0.0205599
		339.38	0.0206122
		339.435	0.0206635
		339.49	0.0207138
		339.545	0.0207632
		339.6	0.0208117
		339.655	0.0208592
		339.71	0.0209058
		339.765	0.0209514
		339.82	0.0209959
		339.875	0.0210395
		339.93	0.0210821
		339.985	0.0211237
		340.04	0.0211643
		340.095	0.0212038
		340.15	0.0212424
		340.205	0.0212799
		340.26	0.0213163
		340.315	0.0213518
		340.37	0.0213862
		340.425	0.0214195
		340.48	0.0214519
		340.535	0.0214832
		340.59	0.0215134
		340.645	0.0215426
		340.7	0.0215708
		340.755	0.0215979
		340.81	0.0216241
		340.865	0.0216491
		340.92	0.0216732
		340.975	0.0216962
		341.03	0.0217183
		341.085	0.0217393
		341.14	0.0217593
		341.195	0.0217783
		341.25	0.0217964
		341.305	0.0218134
		341.36	0.0218295
		341.415	0.0218446
		341.47	0.0218588
		341.525	0.021872
		341.58	0.0218843
		341.635	0.0218957
		341.69	0.0219061
		341.745	0.0219157
		341.8	0.0219244
		341.855	0.0219322
		341.91	0.0219391
		341.965	0.0219452
		342.02	0.0219504
		342.075	0.0219549
		342.13	0.0219585
		342.185	0.0219613
		342.24	0.0219634
		342.295	0.0219647
		342.35	0.0219652
		342.405	0.021965
		342.46	0.0219641
		342.515	0.0219625
		342.57	0.0219602
		342.625	0.0219573
		342.68	0.0219536
		342.735	0.0219494
		342.79	0.0219445
		342.845	0.021939
		342.9	0.021933
		342.955	0.0219263
		343.01	0.0219192
		343.065	0.0219114
		343.12	0.0219032
		343.175	0.0218944
		343.23	0.0218852
		343.285	0.0218755
		343.34	0.0218653
		343.395	0.0218547
		343.45	0.0218437
		343.505	0.0218322
		343.56	0.0218204
		343.615	0.0218082
		343.67	0.0217956
		343.725	0.0217827
		343.78	0.0217694
		343.835	0.0217559
		343.89	0.021742
		343.945	0.0217279
		344	0.0217134
		344.055	0.0216987
		344.11	0.0216838
		344.165	0.0216687
		344.22	0.0216533
		344.275	0.0216377
		344.33	0.0216219
		344.385	0.021606
		344.44	0.0215899
		344.495	0.0215736
		344.55	0.0215572
		344.605	0.0215406
		344.66	0.021524
		344.715	0.0215072
		344.77	0.0214903
		344.825	0.0214734
		344.88	0.0214563
		344.935	0.0214392
		344.99	0.021422
		345.045	0.0214048
		345.1	0.0213876
		345.155	0.0213703
		345.21	0.021353
		345.265	0.0213356
		345.32	0.0213183
		345.375	0.021301
		345.43	0.0212837
		345.485	0.0212663
		345.54	0.0212491
		345.595	0.0212318
		345.65	0.0212146
		345.705	0.0211974
		345.76	0.0211803
		345.815	0.0211632
		345.87	0.0211462
		345.925	0.0211292
		345.98	0.0211124
		346.035	0.0210955
		346.09	0.0210788
		346.145	0.0210622
		346.2	0.0210456
		346.255	0.0210292
		346.31	0.0210128
		346.365	0.0209966
		346.42	0.0209805
		346.475	0.0209644
		346.53	0.0209485
		346.585	0.0209327
		346.64	0.020917
		346.695	0.0209015
		346.75	0.0208861
		346.805	0.0208708
		346.86	0.0208557
		346.915	0.0208407
		346.97	0.0208258
		347.025	0.0208111
		347.08	0.0207965
		347.135	0.0207821
		347.19	0.0207678
		347.245	0.0207537
		347.3	0.0207397
		347.355	0.020726
		347.41	0.0207123
		347.465	0.0206989
		347.52	0.0206856
		347.575	0.0206725
		347.63	0.0206596
		347.685	0.0206468
		347.74	0.0206342
		347.795	0.0206218
		347.85	0.0206096
		347.905	0.0205976
		347.96	0.0205858
		348.015	0.0205742
		348.07	0.0205627
		348.125	0.0205515
		348.18	0.0205405
		348.235	0.0205297
		348.29	0.020519
		348.345	0.0205086
		348.4	0.0204984
		348.455	0.0204885
		348.51	0.0204787
		348.565	0.0204691
		348.62	0.0204598
		348.675	0.0204507
		348.73	0.0204419
		348.785	0.0204332
		348.84	0.0204248
		348.895	0.0204166
		348.95	0.0204087
		349.005	0.020401
		349.06	0.0203935
		349.115	0.0203863
		349.17	0.0203793
		349.225	0.0203726
		349.28	0.0203662
		349.335	0.0203599
		349.39	0.020354
		349.445	0.0203483
		349.5	0.0203428
		349.555	0.0203376
		349.61	0.0203327
		349.665	0.020328
		349.72	0.0203236
		349.775	0.0203195
		349.83	0.0203156
		349.885	0.020312
		349.94	0.0203087
		349.995	0.0203056
		350.05	0.0203028
		350.105	0.0203003
		350.16	0.020298
		350.215	0.0202961
		350.27	0.0202944
		350.325	0.0202929
		350.38	0.0202918
		350.435	0.0202909
		350.49	0.0202903
		350.545	0.0202899
		350.6	0.0202899
		350.655	0.0202901
		350.71	0.0202906
		350.765	0.0202913
		350.82	0.0202923
		350.875	0.0202936
		350.93	0.0202952
		350.985	0.020297
		351.04	0.0202991
		351.095	0.0203014
		351.15	0.020304
		351.205	0.0203069
		351.26	0.02031
		351.315	0.0203133
		351.37	0.020317
		351.425	0.0203208
		351.48	0.0203249
		351.535	0.0203292
		351.59	0.0203338
		351.645	0.0203386
		351.7	0.0203436
		351.755	0.0203488
		351.81	0.0203543
		351.865	0.0203599
		351.92	0.0203658
		351.975	0.0203719
		352.03	0.0203782
		352.085	0.0203846
		352.14	0.0203913
		352.195	0.0203981
		352.25	0.0204051
		352.305	0.0204123
		352.36	0.0204196
		352.415	0.0204271
		352.47	0.0204347
		352.525	0.0204425
		352.58	0.0204504
		352.635	0.0204585
		352.69	0.0204666
		352.745	0.0204749
		352.8	0.0204833
		352.855	0.0204918
		352.91	0.0205004
		352.965	0.020509
		353.02	0.0205178
		353.075	0.0205266
		353.13	0.0205355
		353.185	0.0205444
		353.24	0.0205533
		353.295	0.0205623
		353.35	0.0205714
		353.405	0.0205804
		353.46	0.0205895
		353.515	0.0205985
		353.57	0.0206076
		353.625	0.0206166
		353.68	0.0206256
		353.735	0.0206346
		353.79	0.0206435
		353.845	0.0206524
		353.9	0.0206613
		353.955	0.02067
		354.01	0.0206787
		354.065	0.0206873
		354.12	0.0206958
		354.175	0.0207042
		354.23	0.0207125
		354.285	0.0207206
		354.34	0.0207286
		354.395	0.0207365
		354.45	0.0207443
		354.505	0.0207519
		354.56	0.0207593
		354.615	0.0207666
		354.67	0.0207736
		354.725	0.0207805
		354.78	0.0207872
		354.835	0.0207937
		354.89	0.0207999
		354.945	0.020806
		355	0.0208118
		355.055	0.0208173
		355.11	0.0208227
		355.165	0.0208277
		355.22	0.0208325
		355.275	0.0208371
		355.33	0.0208413
		355.385	0.0208453
		355.44	0.020849
		355.495	0.0208524
		355.55	0.0208555
		355.605	0.0208583
		355.66	0.0208607
		355.715	0.0208628
		355.77	0.0208646
		355.825	0.0208661
		355.88	0.0208672
		355.935	0.020868
		355.99	0.0208684
		356.045	0.0208684
		356.1	0.0208681
		356.155	0.0208674
		356.21	0.0208664
		356.265	0.0208649
		356.32	0.020863
		356.375	0.0208608
		356.43	0.0208582
		356.485	0.0208551
		356.54	0.0208517
		356.595	0.0208478
		356.65	0.0208435
		356.705	0.0208388
		356.76	0.0208337
		356.815	0.0208281
		356.87	0.0208221
		356.925	0.0208157
		356.98	0.0208088
		357.035	0.0208015
		357.09	0.0207937
		357.145	0.0207855
		357.2	0.0207768
		357.255	0.0207677
		357.31	0.0207581
		357.365	0.020748
		357.42	0.0207375
		357.475	0.0207265
		357.53	0.020715
		357.585	0.0207031
		357.64	0.0206907
		357.695	0.0206778
		357.75	0.0206644
		357.805	0.0206506
		357.86	0.0206362
		357.915	0.0206214
		357.97	0.0206061
		358.025	0.0205903
		358.08	0.020574
		358.135	0.0205573
		358.19	0.02054
		358.245	0.0205223
		358.3	0.020504
		358.355	0.0204853
		358.41	0.0204661
		358.465	0.0204464
		358.52	0.0204262
		358.575	0.0204055
		358.63	0.0203843
		358.685	0.0203626
		358.74	0.0203404
		358.795	0.0203177
		358.85	0.0202945
		358.905	0.0202709
		358.96	0.0202467
		359.015	0.0202221
		359.07	0.020197
		359.125	0.0201714
		359.18	0.0201453
		359.235	0.0201187
		359.29	0.0200916
		359.345	0.020064
		359.4	0.020036
		359.455	0.0200075
		359.51	0.0199785
		359.565	0.019949
		359.62	0.0199191
		359.675	0.0198887
		359.73	0.0198578
		359.785	0.0198265
		359.84	0.0197947
		359.895	0.0197624
		359.95	0.0197297
		360.005	0.0196965
		360.06	0.0196629
		360.115	0.0196288
		360.17	0.0195943
		360.225	0.0195594
		360.28	0.019524
		360.335	0.0194882
		360.39	0.0194519
		360.445	0.0194152
		360.5	0.0193781
		360.555	0.0193406
		360.61	0.0193027
		360.665	0.0192644
		360.72	0.0192257
		360.775	0.0191865
		360.83	0.019147
		360.885	0.0191071
		360.94	0.0190668
		360.995	0.0190262
		361.05	0.0189851
		361.105	0.0189438
		361.16	0.018902
		361.215	0.0188599
		361.27	0.0188174
		361.325	0.0187747
		361.38	0.0187315
		361.435	0.0186881
		361.49	0.0186443
		361.545	0.0186002
		361.6	0.0185558
		361.655	0.0185111
		361.71	0.0184661
		361.765	0.0184208
		361.82	0.0183752
		361.875	0.0183294
		361.93	0.0182832
		361.985	0.0182368
		362.04	0.0181902
		362.095	0.0181433
		362.15	0.0180962
		362.205	0.0180488
		362.26	0.0180012
		362.315	0.0179534
		362.37	0.0179054
		362.425	0.0178572
		362.48	0.0178088
		362.535	0.0177602
		362.59	0.0177114
		362.645	0.0176625
		362.7	0.0176133
		362.755	0.0175641
		362.81	0.0175146
		362.865	0.0174651
		362.92	0.0174154
		362.975	0.0173655
		363.03	0.0173156
		363.085	0.0172655
		363.14	0.0172153
		363.195	0.017165
		363.25	0.0171147
		363.305	0.0170642
		363.36	0.0170137
		363.415	0.0169631
		363.47	0.0169124
		363.525	0.0168617
		363.58	0.0168109
		363.635	0.0167601
		363.69	0.0167093
		363.745	0.0166584
		363.8	0.0166076
		363.855	0.0165567
		363.91	0.0165058
		363.965	0.0164549
		364.02	0.016404
		364.075	0.0163531
		364.13	0.0163022
		364.185	0.0162514
		364.24	0.0162006
		364.295	0.0161498
		364.35	0.0160991
		364.405	0.0160484
		364.46	0.0159977
		364.515	0.0159472
		364.57	0.0158967
		364.625	0.0158462
		364.68	0.0157959
		364.735	0.0157456
		364.79	0.0156954
		364.845	0.0156453
		364.9	0.0155953
		364.955	0.0155454
		365.01	0.0154956
		365.065	0.0154459
		365.12	0.0153963
		365.175	0.0153468
		365.23	0.0152974
		365.285	0.0152482
		365.34	0.0151991
		365.395	0.0151501
		365.45	0.0151013
		365.505	0.0150526
		365.56	0.015004
		365.615	0.0149556
		365.67	0.0149073
		365.725	0.0148591
		365.78	0.0148112
		365.835	0.0147633
		365.89	0.0147156
		365.945	0.0146681
		366	0.0146208
		366.055	0.0145736
		366.11	0.0145265
		366.165	0.0144796
		366.22	0.0144329
		366.275	0.0143864
		366.33	0.01434
		366.385	0.0142938
		366.44	0.0142478
		366.495	0.0142019
		366.55	0.0141562
		366.605	0.0141107
		366.66	0.0140654
		366.715	0.0140202
		366.77	0.0139752
		366.825	0.0139304
		366.88	0.0138858
		366.935	0.0138413
		366.99	0.013797
		367.045	0.0137529
		367.1	0.013709
		367.155	0.0136653
		367.21	0.0136217
		367.265	0.0135783
		367.32	0.0135351
		367.375	0.0134921
		367.43	0.0134492
		367.485	0.0134065
		367.54	0.013364
		367.595	0.0133217
		367.65	0.0132795
		367.705	0.0132376
		367.76	0.0131958
		367.815	0.0131541
		367.87	0.0131127
		367.925	0.0130714
		367.98	0.0130303
		368.035	0.0129893
		368.09	0.0129486
		368.145	0.012908
		368.2	0.0128675
		368.255	0.0128273
		368.31	0.0127872
		368.365	0.0127473
		368.42	0.0127075
		368.475	0.0126679
		368.53	0.0126285
		368.585	0.0125893
		368.64	0.0125502
		368.695	0.0125112
		368.75	0.0124725
		368.805	0.0124339
		368.86	0.0123954
		368.915	0.0123572
		368.97	0.0123191
		369.025	0.0122811
		369.08	0.0122433
		369.135	0.0122057
		369.19	0.0121682
		369.245	0.0121309
		369.3	0.0120937
		369.355	0.0120567
		369.41	0.0120199
		369.465	0.0119832
		369.52	0.0119467
		369.575	0.0119103
		369.63	0.0118741
		369.685	0.0118381
		369.74	0.0118022
		369.795	0.0117664
		369.85	0.0117308
		369.905	0.0116954
		369.96	0.0116601
		370.015	0.011625
		370.07	0.01159
		370.125	0.0115552
		370.18	0.0115206
		370.235	0.0114861
		370.29	0.0114517
		370.345	0.0114175
		370.4	0.0113835
		370.455	0.0113496
		370.51	0.0113159
		370.565	0.0112824
		370.62	0.011249
		370.675	0.0112157
		370.73	0.0111826
		370.785	0.0111497
		370.84	0.0111169
		370.895	0.0110843
		370.95	0.0110519
		371.005	0.0110196
		371.06	0.0109874
		371.115	0.0109555
		371.17	0.0109237
		371.225	0.010892
		371.28	0.0108605
		371.335	0.0108292
		371.39	0.010798
		371.445	0.010767
		371.5	0.0107362
		371.555	0.0107055
		371.61	0.010675
		371.665	0.0106447
		371.72	0.0106145
		371.775	0.0105845
		371.83	0.0105547
		371.885	0.010525
		371.94	0.0104955
		371.995	0.0104662
		372.05	0.010437
		372.105	0.0104081
		372.16	0.0103793
		372.215	0.0103506
		372.27	0.0103221
		372.325	0.0102939
		372.38	0.0102657
		372.435	0.0102378
		372.49	0.01021
		372.545	0.0101824
		372.6	0.010155
		372.655	0.0101278
		372.71	0.0101007
		372.765	0.0100738
		372.82	0.0100471
		372.875	0.0100205
		372.93	0.00999419
		372.985	0.00996801
		373.04	0.00994199
		373.095	0.00991617
		373.15	0.00989052
		373.205	0.00986505
		373.26	0.00983975
		373.315	0.00981464
		373.37	0.00978971
		373.425	0.00976496
		373.48	0.00974038
		373.535	0.00971599
		373.59	0.00969177
		373.645	0.00966771
		373.7	0.00964385
		373.755	0.00962017
		373.81	0.00959667
		373.865	0.00957334
		373.92	0.00955019
		373.975	0.00952722
		374.03	0.00950442
		374.085	0.0094818
		374.14	0.00945936
		374.195	0.00943708
		374.25	0.00941499
		374.305	0.00939306
		374.36	0.00937131
		374.415	0.00934973
		374.47	0.00932831
		374.525	0.00930707
		374.58	0.00928601
		374.635	0.00926511
		374.69	0.00924437
		374.745	0.00922381
		374.8	0.0092034
		374.855	0.00918317
		374.91	0.00916309
		374.965	0.00914318
		375.02	0.00912343
		375.075	0.00910384
		375.13	0.00908441
		375.185	0.00906513
		375.24	0.00904601
		375.295	0.00902704
		375.35	0.00900822
		375.405	0.00898956
		375.46	0.00897103
		375.515	0.00895266
		375.57	0.00893444
		375.625	0.00891637
		375.68	0.00889843
		375.735	0.00888064
		375.79	0.00886299
		375.845	0.00884547
		375.9	0.00882809
		375.955	0.00881085
		376.01	0.00879373
		376.065	0.00877675
		376.12	0.00875989
		376.175	0.00874316
		376.23	0.00872655
		376.285	0.00871007
		376.34	0.0086937
		376.395	0.00867746
		376.45	0.00866133
		376.505	0.00864531
		376.56	0.0086294
		376.615	0.00861361
		376.67	0.00859792
		376.725	0.00858233
		376.78	0.00856685
		376.835	0.00855147
		376.89	0.00853618
		376.945	0.008521
		377	0.0085059
		377.055	0.0084909
		377.11	0.00847599
		377.165	0.00846116
		377.22	0.00844642
		377.275	0.00843176
		377.33	0.00841718
		377.385	0.00840267
		377.44	0.00838824
		377.495	0.00837387
		377.55	0.00835959
		377.605	0.00834537
		377.66	0.00833122
		377.715	0.00831713
		377.77	0.0083031
		377.825	0.00828913
		377.88	0.00827522
		377.935	0.00826136
		377.99	0.00824755
		378.045	0.00823379
		378.1	0.00822008
		378.155	0.0082064
		378.21	0.00819277
		378.265	0.00817919
		378.32	0.00816564
		378.375	0.00815213
		378.43	0.00813864
		378.485	0.00812519
		378.54	0.00811177
		378.595	0.00809838
		378.65	0.008085
		378.705	0.00807165
		378.76	0.00805831
		378.815	0.00804499
		378.87	0.00803169
		378.925	0.0080184
		378.98	0.00800513
		379.035	0.00799186
		379.09	0.0079786
		379.145	0.00796534
		379.2	0.00795208
		379.255	0.00793881
		379.31	0.00792555
		379.365	0.00791229
		379.42	0.00789902
		379.475	0.00788574
		379.53	0.00787246
		379.585	0.00785916
		379.64	0.00784584
		379.695	0.0078325
		379.75	0.00781915
		379.805	0.00780578
		379.86	0.00779239
		379.915	0.00777898
		379.97	0.00776553
		380.025	0.00775207
		380.08	0.00773857
		380.135	0.00772505
		380.19	0.00771149
		380.245	0.0076979
		380.3	0.00768427
		380.355	0.0076706
		380.41	0.0076569
		380.465	0.00764315
		380.52	0.00762936
		380.575	0.00761553
		380.63	0.00760165
		380.685	0.00758773
		380.74	0.00757375
		380.795	0.00755973
		380.85	0.00754565
		380.905	0.00753152
		380.96	0.00751734
		381.015	0.0075031
		381.07	0.0074888
		381.125	0.00747444
		381.18	0.00746002
		381.235	0.00744555
		381.29	0.007431
		381.345	0.0074164
		381.4	0.00740172
		381.455	0.00738698
		381.51	0.00737218
		381.565	0.0073573
		381.62	0.00734235
		381.675	0.00732733
		381.73	0.00731224
		381.785	0.00729707
		381.84	0.00728183
		381.895	0.00726651
		381.95	0.00725112
		382.005	0.00723564
		382.06	0.00722009
		382.115	0.00720444
		382.17	0.00718872
		382.225	0.00717292
		382.28	0.00715704
		382.335	0.00714107
		382.39	0.00712501
		382.445	0.00710887
		382.5	0.00709264
		382.555	0.00707632
		382.61	0.00705991
		382.665	0.00704341
		382.72	0.00702682
		382.775	0.00701013
		382.83	0.00699336
		382.885	0.00697648
		382.94	0.0069595
		382.995	0.00694244
		383.05	0.00692528
		383.105	0.00690801
		383.16	0.00689066
		383.215	0.0068732
		383.27	0.00685565
		383.325	0.00683798
		383.38	0.00682023
		383.435	0.00680236
		383.49	0.0067844
		383.545	0.00676634
		383.6	0.00674816
		383.655	0.00672988
		383.71	0.00671151
		383.765	0.00669302
		383.82	0.00667444
		383.875	0.00665574
		383.93	0.00663693
		383.985	0.00661802
		384.04	0.006599
		384.095	0.00657987
		384.15	0.00656063
		384.205	0.00654127
		384.26	0.00652181
		384.315	0.00650224
		384.37	0.00648255
		384.425	0.00646275
		384.48	0.00644284
		384.535	0.00642282
		384.59	0.00640267
		384.645	0.00638242
		384.7	0.00636205
		384.755	0.00634156
		384.81	0.00632097
		384.865	0.00630026
		384.92	0.00627944
		384.975	0.0062585
		385.03	0.00623744
		385.085	0.00621627
		385.14	0.00619499
		385.195	0.00617358
		385.25	0.00615207
		385.305	0.00613043
		385.36	0.00610868
		385.415	0.00608681
		385.47	0.00606483
		385.525	0.00604273
		385.58	0.00602051
		385.635	0.00599818
		385.69	0.00597573
		385.745	0.00595316
		385.8	0.00593048
		385.855	0.00590768
		385.91	0.00588477
		385.965	0.00586174
		386.02	0.0058386
		386.075	0.00581534
		386.13	0.00579196
		386.185	0.00576847
		386.24	0.00574487
		386.295	0.00572116
		386.35	0.00569733
		386.405	0.00567339
		386.46	0.00564933
		386.515	0.00562517
		386.57	0.00560089
		386.625	0.0055765
		386.68	0.00555198
		386.735	0.00552737
		386.79	0.00550266
		386.845	0.00547783
		386.9	0.0054529
		386.955	0.00542787
		387.01	0.00540272
		387.065	0.00537748
		387.12	0.00535213
		387.175	0.00532667
		387.23	0.00530112
		387.285	0.00527546
		387.34	0.0052497
		387.395	0.00522384
		387.45	0.00519789
		387.505	0.00517184
		387.56	0.00514568
		387.615	0.00511944
		387.67	0.0050931
		387.725	0.00506667
		387.78	0.00504016
		387.835	0.00501355
		387.89	0.00498685
		387.945	0.00496006
		388	0.00493319
		388.055	0.00490624
		388.11	0.00487921
		388.165	0.00485209
		388.22	0.0048249
		388.275	0.00479763
		388.33	0.00477028
		388.385	0.00474286
		388.44	0.00471536
		388.495	0.0046878
		388.55	0.00466017
		388.605	0.00463246
		388.66	0.0046047
		388.715	0.00457687
		388.77	0.00454897
		388.825	0.00452102
		388.88	0.00449301
		388.935	0.00446494
		388.99	0.00443681
		389.045	0.00440864
		389.1	0.00438042
		389.155	0.00435215
		389.21	0.00432383
		389.265	0.00429547
		389.32	0.00426707
		389.375	0.00423864
		389.43	0.00421016
		389.485	0.00418165
		389.54	0.00415311
		389.595	0.00412453
		389.65	0.00409593
		389.705	0.0040673
		389.76	0.00403865
		389.815	0.00400998
		389.87	0.00398129
		389.925	0.00395259
		389.98	0.00392387
		390.035	0.00389514
		390.09	0.0038664
		390.145	0.00383765
		390.2	0.0038089
		390.255	0.00378015
		390.31	0.00375141
		390.365	0.00372266
		390.42	0.00369392
		390.475	0.00366519
		390.53	0.00363647
		390.585	0.00360776
		390.64	0.00357906
		390.695	0.00355039
		390.75	0.00352174
		390.805	0.00349312
		390.86	0.00346452
		390.915	0.00343595
		390.97	0.00340742
		391.025	0.00337892
		391.08	0.00335045
		391.135	0.00332202
		391.19	0.00329364
		391.245	0.0032653
		391.3	0.00323701
		391.355	0.00320876
		391.41	0.00318057
		391.465	0.00315244
		391.52	0.00312435
		391.575	0.00309633
		391.63	0.00306837
		391.685	0.00304048
		391.74	0.00301265
		391.795	0.0029849
		391.85	0.00295722
		391.905	0.00292961
		391.96	0.00290208
		392.015	0.00287461
		392.07	0.00284724
		392.125	0.00281996
		392.18	0.00279274
		392.235	0.00276563
		392.29	0.00273862
		392.345	0.00271169
		392.4	0.00268485
		392.455	0.00265811
		392.51	0.00263148
		392.565	0.00260495
		392.62	0.00257853
		392.675	0.00255221
		392.73	0.00252599
		392.785	0.00249989
		392.84	0.0024739
		392.895	0.00244803
		392.95	0.00242227
		393.005	0.00239664
		393.06	0.00237112
		393.115	0.00234573
		393.17	0.00232046
		393.225	0.00229531
		393.28	0.0022703
		393.335	0.00224541
		393.39	0.00222066
		393.445	0.00219604
		393.5	0.00217155
		393.555	0.0021472
		393.61	0.00212299
		393.665	0.00209892
		393.72	0.00207499
		393.775	0.0020512
		393.83	0.00202755
		393.885	0.00200406
		393.94	0.0019807
		393.995	0.0019575
		394.05	0.00193444
		394.105	0.00191154
		394.16	0.00188877
		394.215	0.00186617
		394.27	0.00184373
		394.325	0.00182144
		394.38	0.0017993
		394.435	0.00177733
		394.49	0.00175551
		394.545	0.00173385
		394.6	0.00171235
		394.655	0.00169101
		394.71	0.00166983
		394.765	0.00164882
		394.82	0.00162797
		394.875	0.00160728
		394.93	0.00158676
		394.985	0.0015664
		395.04	0.0015462
		395.095	0.00152618
		395.15	0.00150632
		395.205	0.00148663
		395.26	0.0014671
		395.315	0.00144774
		395.37	0.00142855
		395.425	0.00140953
		395.48	0.00139068
		395.535	0.001372
		395.59	0.00135349
		395.645	0.00133514
		395.7	0.00131697
		395.755	0.00129897
		395.81	0.00128113
		395.865	0.00126347
		395.92	0.00124597
		395.975	0.00122864
		396.03	0.00121149
		396.085	0.0011945
		396.14	0.00117768
		396.195	0.00116103
		396.25	0.00114455
		396.305	0.00112824
		396.36	0.0011121
		396.415	0.00109612
		396.47	0.00108032
		396.525	0.00106468
		396.58	0.0010492
		396.635	0.00103389
		396.69	0.00101875
		396.745	0.00100378
		396.8	0.000988964
		396.855	0.000974316
		396.91	0.000959832
		396.965	0.000945512
		397.02	0.000931353
		397.075	0.000917357
		397.13	0.000903521
		397.185	0.000889846
		397.24	0.000876331
		397.295	0.000862974
		397.35	0.000849763
		397.405	0.000836722
		397.46	0.000823838
		397.515	0.00081111
		397.57	0.000798536
		397.625	0.000786104
		397.68	0.000773837
		397.735	0.000761723
		397.79	0.00074976
		397.845	0.000737948
		397.9	0.000726284
		397.955	0.000714769
		398.01	0.000703402
		398.065	0.00069218
		398.12	0.000681104
		398.175	0.000670173
		398.23	0.000659384
		398.285	0.000648738
		398.34	0.000638232
		398.395	0.000627854
		398.45	0.000617628
		398.505	0.00060754
		398.56	0.000597588
		398.615	0.000587772
		398.67	0.000578078
		398.725	0.00056853
		398.78	0.000559114
		398.835	0.000549829
		398.89	0.000540675
		398.945	0.000531648
		399	0.000522749
		399.055	0.000513977
		399.11	0.000505329
		399.165	0.000496806
		399.22	0.000488405
		399.275	0.000480125
		399.33	0.000471966
		399.385	0.000463926
		399.44	0.000456004
		399.495	0.000448199
		399.55	0.000440509
		399.605	0.000432934
		399.66	0.000425471
		399.715	0.000418121
		399.77	0.000410881
		399.825	0.00040375
		399.88	0.000396728
		399.935	0.000389813
		399.99	0.000383004
		400.045	0.000376299
		400.1	0.000369698
		400.155	0.000363199
		400.21	0.000356801
		400.265	0.000350503
		400.32	0.000344303
		400.375	0.000338201
		400.43	0.000332196
		400.485	0.000326285
		400.54	0.000320469
		400.595	0.000314745
		400.65	0.000309113
		400.705	0.000303571
		400.76	0.000298119
		400.815	0.000292755
		400.87	0.000287478
		400.925	0.000282287
		400.98	0.000277181
		401.035	0.000272158
		401.09	0.000267218
		401.145	0.00026236
		401.2	0.000257582
		401.255	0.000252883
		401.31	0.000248262
		401.365	0.000243719
		401.42	0.000239252
		401.475	0.000234859
		401.53	0.000230541
		401.585	0.000226296
		401.64	0.000222122
		401.695	0.00021802
		401.75	0.000213987
		401.805	0.000210023
		401.86	0.000206127
		401.915	0.000202298
		401.97	0.000198535
		402.025	0.000194824
		402.08	0.00019119
		402.135	0.000187619
		402.19	0.00018411
		402.245	0.000180663
		402.3	0.000177276
		402.355	0.000173947
		402.41	0.000170678
		402.465	0.000167466
		402.52	0.00016431
		402.575	0.000161211
		402.63	0.000158166
		402.685	0.000155175
		402.74	0.000152238
		402.795	0.000149352
		402.85	0.000146519
		402.905	0.000143736
		402.96	0.000141003
		403.015	0.000138319
		403.07	0.000135684
		403.125	0.000133096
		403.18	0.000130554
		403.235	0.000128059
		403.29	0.000125609
		403.345	0.000123204
		403.4	0.000120843
		403.455	0.000118524
		403.51	0.000116248
		403.565	0.000114014
		403.62	0.00011182
		403.675	0.000109667
		403.73	0.000107554
		403.785	0.000105479
		403.84	0.000103443
		403.895	0.000101444
		403.95	9.94828e-05
		404.005	9.75576e-05
		404.06	9.56682e-05
		404.115	9.38139e-05
		404.17	9.19812e-05
		404.225	9.0196e-05
		404.28	8.8444e-05
		404.335	8.67249e-05
		404.39	8.50251e-05
		404.445	8.33701e-05
		404.5	8.17462e-05
		404.555	8.01529e-05
		404.61	7.85895e-05
		404.665	7.70557e-05
		404.72	7.55508e-05
		404.775	7.40743e-05
		404.83	7.26258e-05
		404.885	7.12048e-05
		404.94	6.97978e-05
		404.995	6.84306e-05
		405.05	6.70893e-05
		405.105	6.57736e-05
		405.16	6.44829e-05
		405.215	6.32169e-05
		405.27	6.1975e-05
		405.325	6.07569e-05
		405.38	5.95621e-05
		405.435	5.83902e-05
		405.49	5.72408e-05
		405.545	5.61134e-05
		405.6	5.50077e-05
		405.655	5.39233e-05
		405.71	5.28598e-05
		405.765	5.18167e-05
		405.82	5.07938e-05
		405.875	4.97906e-05
		405.93	4.88068e-05
		405.985	4.78421e-05
		406.04	4.6896e-05
		406.095	4.59682e-05
		406.15	4.50585e-05
		406.205	4.41664e-05
		406.26	4.32916e-05
		406.315	4.24338e-05
		406.37	4.15927e-05
		406.425	4.0768e-05
		406.48	3.99593e-05
		406.535	3.91665e-05
		406.59	3.83891e-05
		406.645	3.76268e-05
		406.7	3.68795e-05
		406.755	3.61468e-05
		406.81	3.54284e-05
		406.865	3.47241e-05
		406.92	3.40336e-05
		406.975	3.33566e-05
		407.03	3.26929e-05
		407.085	3.20422e-05
		407.14	3.14043e-05
		407.195	3.07789e-05
		407.25	3.01659e-05
		407.305	2.95649e-05
		407.36	2.89757e-05
		407.415	2.83982e-05
		407.47	2.78189e-05
		407.525	2.72644e-05
		407.58	2.67209e-05
		407.635	2.61881e-05
		407.69	2.56658e-05
		407.745	2.51538e-05
		407.8	2.4652e-05
		407.855	2.416e-05
		407.91	2.36778e-05
		407.965	2.32051e-05
		408.02	2.27418e-05
		408.075	2.22876e-05
		408.13	2.18425e-05
		408.185	2.14061e-05
		408.24	2.09785e-05
		408.295	2.05593e-05
		408.35	2.01484e-05
		408.405	1.97456e-05
		408.46	1.93509e-05
		408.515	1.8964e-05
		408.57	1.85848e-05
		408.625	1.82132e-05
		408.68	1.78489e-05
		408.735	1.7479e-05
		408.79	1.71164e-05
		408.845	1.67743e-05
		408.9	1.6439e-05
		408.955	1.61103e-05
		409.01	1.57883e-05
		409.065	1.54726e-05
		409.12	1.51632e-05
		409.175	1.486e-05
		409.23	1.45628e-05
		409.285	1.42715e-05
		409.34	1.39861e-05
		409.395	1.37063e-05
		409.45	1.34321e-05
		409.505	1.31634e-05
		409.56	1.29001e-05
		409.615	1.2642e-05
		409.67	1.23891e-05
		409.725	1.21412e-05
		409.78	1.18983e-05
		409.835	1.16602e-05
		409.89	1.14269e-05
		409.945	1.11852e-05
[truncated: 1 more rows]

## Sheet: PlotDat7
Source sheet	data	310	2.80759e-07
Plot name	ProbDens7	310.045	2.87641e-07
Plot Type	16	310.09	2.94693e-07
1st free col	5	310.135	3.01921e-07
Sigma Level	2	310.18	3.09328e-07
Absolute Errs	TRUE	310.225	3.1692e-07
Symbol Type	5	310.27	3.247e-07
Inverse Plot	FALSE	310.315	3.32674e-07
Color Plot	FALSE	310.36	3.40847e-07
3D plot	FALSE	310.405	3.49223e-07
Linear	FALSE	310.45	3.57807e-07
Data Range	AD428:AE500	310.495	3.66606e-07
Filled Symbols	TRUE	310.54	3.75624e-07
ConcAge	FALSE	310.585	3.98738e-07
ConcSwap	FALSE	310.63	4.22311e-07
1st Symbol-row	1	310.675	4.32684e-07
		310.72	4.43314e-07
		310.765	4.54208e-07
		310.81	4.79182e-07
		310.855	4.9106e-07
		310.9	5.03236e-07
		310.945	5.15716e-07
		310.99	5.28508e-07
		311.035	5.41621e-07
		311.08	5.55061e-07
		311.125	5.68837e-07
		311.17	5.82957e-07
		311.215	5.97431e-07
		311.26	6.12266e-07
		311.305	6.27473e-07
		311.35	6.4306e-07
		311.395	6.59037e-07
		311.44	6.75413e-07
		311.485	6.92199e-07
		311.53	7.09404e-07
		311.575	7.2704e-07
		311.62	7.45117e-07
		311.665	7.63645e-07
		311.71	7.82637e-07
		311.755	8.02103e-07
		311.8	8.22056e-07
		311.845	8.56663e-07
		311.89	8.78116e-07
		311.935	9.0011e-07
		311.98	9.22657e-07
		312.025	9.45772e-07
		312.07	9.83464e-07
		312.115	1.02189e-06
		312.16	1.04754e-06
		312.205	1.07383e-06
		312.25	1.10078e-06
		312.295	1.12841e-06
		312.34	1.15673e-06
		312.385	1.18577e-06
		312.43	1.21553e-06
		312.475	1.25983e-06
		312.52	1.29149e-06
		312.565	1.32394e-06
		312.61	1.3572e-06
		312.655	1.39131e-06
		312.7	1.42626e-06
		312.745	1.47581e-06
		312.79	1.5267e-06
		312.835	1.56524e-06
		312.88	1.60474e-06
		312.925	1.64525e-06
		312.97	1.68676e-06
		313.015	1.72933e-06
		313.06	1.77296e-06
		313.105	1.81769e-06
		313.15	1.86354e-06
		313.195	1.92431e-06
		313.24	1.97285e-06
		313.285	2.03639e-06
		313.33	2.08768e-06
		313.375	2.14026e-06
		313.42	2.19415e-06
		313.465	2.24938e-06
		313.51	2.306e-06
		313.555	2.36403e-06
		313.6	2.4235e-06
		313.645	2.48446e-06
		313.69	2.54693e-06
		313.735	2.61096e-06
		313.78	2.70447e-06
		313.825	2.7726e-06
		313.87	2.84243e-06
		313.915	2.91399e-06
		313.96	2.98734e-06
		314.005	3.06251e-06
		314.05	3.13955e-06
		314.095	3.21849e-06
		314.14	3.2994e-06
		314.185	3.38231e-06
		314.23	3.46728e-06
		314.275	3.56817e-06
		314.32	3.65774e-06
		314.365	3.74952e-06
		314.41	3.84357e-06
		314.455	3.93994e-06
		314.5	4.03868e-06
		314.545	4.13985e-06
		314.59	4.2435e-06
		314.635	4.34971e-06
		314.68	4.45852e-06
		314.725	4.57e-06
		314.77	4.68421e-06
		314.815	4.80121e-06
		314.86	4.92107e-06
		314.905	5.04387e-06
		314.95	5.16966e-06
		314.995	5.29851e-06
		315.04	5.4305e-06
		315.085	5.5657e-06
		315.13	5.70418e-06
		315.175	5.84603e-06
		315.22	5.99131e-06
		315.265	6.14011e-06
		315.31	6.29251e-06
		315.355	6.44859e-06
		315.4	6.60844e-06
		315.445	6.78608e-06
		315.49	6.95406e-06
		315.535	7.12607e-06
		315.58	7.30221e-06
		315.625	7.48257e-06
		315.67	7.66725e-06
		315.715	7.87033e-06
		315.76	8.06439e-06
		315.805	8.26309e-06
		315.85	8.46653e-06
		315.895	8.67481e-06
		315.94	8.88804e-06
		315.985	9.10632e-06
		316.03	9.34361e-06
		316.075	9.57276e-06
		316.12	9.80733e-06
		316.165	1.00474e-05
		316.21	1.02932e-05
		316.255	1.05447e-05
		316.3	1.08022e-05
		316.345	1.10657e-05
		316.39	1.13354e-05
		316.435	1.16252e-05
		316.48	1.1908e-05
		316.525	1.21974e-05
		316.57	1.24935e-05
		316.615	1.27965e-05
		316.66	1.31065e-05
		316.705	1.34238e-05
		316.75	1.37483e-05
		316.795	1.40804e-05
		316.84	1.44201e-05
		316.885	1.47676e-05
		316.93	1.51231e-05
		316.975	1.54868e-05
		317.02	1.58588e-05
		317.065	1.62393e-05
		317.11	1.66284e-05
		317.155	1.70265e-05
		317.2	1.74476e-05
		317.245	1.78784e-05
		317.29	1.8305e-05
		317.335	1.87412e-05
		317.38	1.91873e-05
		317.425	1.96434e-05
		317.47	2.01097e-05
		317.515	2.05866e-05
		317.56	2.10741e-05
		317.605	2.15725e-05
		317.65	2.20821e-05
		317.695	2.2603e-05
		317.74	2.31354e-05
		317.785	2.36797e-05
		317.83	2.4236e-05
		317.875	2.48046e-05
		317.92	2.53857e-05
		317.965	2.59796e-05
		318.01	2.65866e-05
		318.055	2.72068e-05
		318.1	2.78406e-05
		318.145	2.84882e-05
		318.19	2.91499e-05
		318.235	2.9826e-05
		318.28	3.05167e-05
		318.325	3.12361e-05
		318.37	3.19574e-05
		318.415	3.26942e-05
		318.46	3.34469e-05
		318.505	3.42157e-05
		318.55	3.50009e-05
		318.595	3.58029e-05
		318.64	3.66219e-05
		318.685	3.74583e-05
		318.73	3.83124e-05
		318.775	3.91846e-05
		318.82	4.00751e-05
		318.865	4.09844e-05
		318.91	4.19128e-05
		318.955	4.28744e-05
		319	4.38423e-05
		319.045	4.48302e-05
		319.09	4.58388e-05
		319.135	4.68682e-05
		319.18	4.79188e-05
		319.225	4.89912e-05
		319.27	5.00993e-05
		319.315	5.12166e-05
		319.36	5.23568e-05
		319.405	5.35202e-05
		319.45	5.47072e-05
		319.495	5.59184e-05
		319.54	5.71541e-05
		319.585	5.84147e-05
		319.63	5.97007e-05
		319.675	6.10126e-05
		319.72	6.23507e-05
		319.765	6.37155e-05
		319.81	6.51214e-05
		319.855	6.65553e-05
		319.9	6.80039e-05
		319.945	6.94811e-05
		319.99	7.09874e-05
		320.035	7.25234e-05
		320.08	7.40894e-05
		320.125	7.56998e-05
		320.17	7.73419e-05
		320.215	7.90021e-05
		320.26	8.06944e-05
		320.305	8.24195e-05
		320.35	8.41918e-05
		320.395	8.59844e-05
		320.44	8.78112e-05
		320.485	8.96729e-05
		320.53	9.157e-05
		320.575	9.35031e-05
		320.62	9.54728e-05
		320.665	9.74796e-05
		320.71	9.95242e-05
		320.755	0.000101607
		320.8	0.000103729
		320.845	0.00010589
		320.89	0.000108091
		320.935	0.000110334
		320.98	0.000112631
		321.025	0.000114957
		321.07	0.000117339
		321.115	0.000119751
		321.16	0.000122208
		321.205	0.000124708
		321.25	0.000127268
		321.295	0.00012986
		321.34	0.000132499
		321.385	0.000135185
		321.43	0.000137933
		321.475	0.000140716
		321.52	0.000143549
		321.565	0.000146431
		321.61	0.000149365
		321.655	0.00015235
		321.7	0.000155387
		321.745	0.000158477
		321.79	0.000161634
		321.835	0.000164833
		321.88	0.000168087
		321.925	0.000171397
		321.97	0.000174764
		322.015	0.000178201
		322.06	0.000181684
		322.105	0.000185226
		322.15	0.000188827
		322.195	0.00019249
		322.24	0.000196213
		322.285	0.000199999
		322.33	0.000203862
		322.375	0.000207776
		322.42	0.000211754
		322.465	0.000215825
		322.51	0.000219936
		322.555	0.000224114
		322.6	0.00022836
		322.645	0.000232675
		322.69	0.00023706
		322.735	0.000241516
		322.78	0.000246042
		322.825	0.000250642
		322.87	0.000255314
		322.915	0.000260061
		322.96	0.000264882
		323.005	0.00026978
		323.05	0.000274754
		323.095	0.000279806
		323.14	0.000284936
		323.185	0.000290146
		323.23	0.000295436
		323.275	0.000300808
		323.32	0.000306261
		323.365	0.000311798
		323.41	0.000317419
		323.455	0.000323139
		323.5	0.000328931
		323.545	0.00033481
		323.59	0.000340776
		323.635	0.000346832
		323.68	0.000352977
		323.725	0.000359213
		323.77	0.00036554
		323.815	0.00037196
		323.86	0.000378473
		323.905	0.000385081
		323.95	0.000391798
		323.995	0.000398598
		324.04	0.000405495
		324.085	0.000412491
		324.13	0.000419586
		324.175	0.000426781
		324.22	0.000434077
		324.265	0.000441489
		324.31	0.000448992
		324.355	0.000456598
		324.4	0.000464309
		324.445	0.000472141
		324.49	0.000480066
		324.535	0.000488099
		324.58	0.000496241
		324.625	0.000504493
		324.67	0.000512857
		324.715	0.000521332
		324.76	0.00052992
		324.805	0.000538622
		324.85	0.00054744
		324.895	0.000556373
		324.94	0.000565423
		324.985	0.000574591
		325.03	0.000583878
		325.075	0.000593284
		325.12	0.000602812
		325.165	0.000612461
		325.21	0.000622248
		325.255	0.000632172
		325.3	0.000642194
		325.345	0.000652342
		325.39	0.00066263
		325.435	0.000673047
		325.48	0.000683579
		325.525	0.00069424
		325.57	0.000705032
		325.615	0.00071597
		325.66	0.000727026
		325.705	0.000738216
		325.75	0.00074954
		325.795	0.000761
		325.84	0.000772596
		325.885	0.000784329
		325.93	0.000796201
		325.975	0.000808211
		326.02	0.000820362
		326.065	0.000832654
		326.11	0.000845087
		326.155	0.000857664
		326.2	0.000870397
		326.245	0.000883262
		326.29	0.000896273
		326.335	0.00090943
		326.38	0.000922735
		326.425	0.000936187
		326.47	0.000949789
		326.515	0.000963541
		326.56	0.000977443
		326.605	0.000991498
		326.65	0.0010057
		326.695	0.00102007
		326.74	0.00103458
		326.785	0.00104925
		326.83	0.00106408
		326.875	0.00107906
		326.92	0.00109421
		326.965	0.00110951
		327.01	0.00112497
		327.055	0.00114059
		327.1	0.00115638
		327.145	0.00117233
		327.19	0.00118844
		327.235	0.00120471
		327.28	0.00122114
		327.325	0.00123774
		327.37	0.0012545
		327.415	0.00127145
		327.46	0.00128854
		327.505	0.00130581
		327.55	0.00132324
		327.595	0.00134085
		327.64	0.00135862
		327.685	0.00137656
		327.73	0.00139468
		327.775	0.00141297
		327.82	0.00143143
		327.865	0.00145008
		327.91	0.00146888
		327.955	0.00148788
		328	0.00150704
		328.045	0.00152638
		328.09	0.00154589
		328.135	0.00156559
		328.18	0.00158546
		328.225	0.00160551
		328.27	0.00162573
		328.315	0.00164614
		328.36	0.00166675
		328.405	0.00168752
		328.45	0.00170847
		328.495	0.00172961
		328.54	0.00175093
		328.585	0.00177244
		328.63	0.00179412
		328.675	0.00181601
		328.72	0.00183807
		328.765	0.00186032
		328.81	0.00188275
		328.855	0.00190537
		328.9	0.00192818
		328.945	0.00195118
		328.99	0.00197436
		329.035	0.00199774
		329.08	0.0020213
		329.125	0.00204506
		329.17	0.00206901
		329.215	0.00209315
		329.26	0.00211748
		329.305	0.002142
		329.35	0.00216672
		329.395	0.00219163
		329.44	0.00221673
		329.485	0.00224203
		329.53	0.00226753
		329.575	0.00229322
		329.62	0.0023191
		329.665	0.00234518
		329.71	0.00237146
		329.755	0.00239795
		329.8	0.00242463
		329.845	0.0024515
		329.89	0.00247857
		329.935	0.00250585
		329.98	0.00253332
		330.025	0.00256099
		330.07	0.00258886
		330.115	0.00261693
		330.16	0.00264521
		330.205	0.00267368
		330.25	0.00270236
		330.295	0.00273124
		330.34	0.00276033
		330.385	0.00278962
		330.43	0.00281912
		330.475	0.00284882
		330.52	0.00287872
		330.565	0.00290883
		330.61	0.00293914
		330.655	0.00296966
		330.7	0.00300039
		330.745	0.00303132
		330.79	0.00306246
		330.835	0.00309381
		330.88	0.00312536
		330.925	0.00315713
		330.97	0.00318911
		331.015	0.00322129
		331.06	0.00325368
		331.105	0.0032863
		331.15	0.00331912
		331.195	0.00335215
		331.24	0.00338539
		331.285	0.00341884
		331.33	0.0034525
		331.375	0.0034864
		331.42	0.00352049
		331.465	0.00355481
		331.51	0.00358933
		331.555	0.00362407
		331.6	0.00365902
		331.645	0.00369419
		331.69	0.00372957
		331.735	0.00376517
		331.78	0.00380099
		331.825	0.00383703
		331.87	0.00387329
		331.915	0.00390977
		331.96	0.00394647
		332.005	0.00398338
		332.05	0.00402052
		332.095	0.00405788
		332.14	0.00409545
		332.185	0.00413325
		332.23	0.00417128
		332.275	0.00420952
		332.32	0.00424799
		332.365	0.00428669
		332.41	0.0043256
		332.455	0.00436475
		332.5	0.00440412
		332.545	0.00444372
		332.59	0.00448354
		332.635	0.00452361
		332.68	0.00456389
		332.725	0.0046044
		332.77	0.00464513
		332.815	0.0046861
		332.86	0.0047273
		332.905	0.00476874
		332.95	0.0048104
		332.995	0.0048523
		333.04	0.00489443
		333.085	0.00493679
		333.13	0.0049794
		333.175	0.00502224
		333.22	0.00506531
		333.265	0.00510861
		333.31	0.00515216
		333.355	0.00519594
		333.4	0.00523996
		333.445	0.00528422
		333.49	0.00532872
		333.535	0.00537347
		333.58	0.00541845
		333.625	0.00546368
		333.67	0.00550915
		333.715	0.00555486
		333.76	0.00560082
		333.805	0.00564702
		333.85	0.00569347
		333.895	0.00574017
		333.94	0.00578711
		333.985	0.00583431
		334.03	0.00588175
		334.075	0.00592944
		334.12	0.00597739
		334.165	0.00602558
		334.21	0.00607403
		334.255	0.00612273
		334.3	0.00617168
		334.345	0.00622089
		334.39	0.00627036
		334.435	0.00632008
		334.48	0.00637006
		334.525	0.0064203
		334.57	0.00647079
		334.615	0.00652155
		334.66	0.00657257
		334.705	0.00662385
		334.75	0.00667539
		334.795	0.00672719
		334.84	0.00677926
		334.885	0.0068316
		334.93	0.0068842
		334.975	0.00693707
		335.02	0.0069902
		335.065	0.0070436
		335.11	0.00709727
		335.155	0.00715121
		335.2	0.00720542
		335.245	0.0072599
		335.29	0.00731466
		335.335	0.00736968
		335.38	0.00742498
		335.425	0.00748056
		335.47	0.00753641
		335.515	0.00759254
		335.56	0.00764894
		335.605	0.00770563
		335.65	0.00776259
		335.695	0.00781983
		335.74	0.00787735
		335.785	0.00793515
		335.83	0.00799323
		335.875	0.0080516
		335.92	0.00811025
		335.965	0.00816918
		336.01	0.0082284
		336.055	0.00828791
		336.1	0.0083477
		336.145	0.00840777
		336.19	0.00846814
		336.235	0.00852879
		336.28	0.00858973
		336.325	0.00865097
		336.37	0.00871249
		336.415	0.0087743
		336.46	0.0088364
		336.505	0.0088988
		336.55	0.00896149
		336.595	0.00902447
		336.64	0.00908775
		336.685	0.00915132
		336.73	0.00921518
		336.775	0.00927934
		336.82	0.0093438
		336.865	0.00940855
		336.91	0.0094736
		336.955	0.00953894
		337	0.00960459
		337.045	0.00967053
		337.09	0.00973677
		337.135	0.00980331
		337.18	0.00987014
		337.225	0.00993728
		337.27	0.0100047
		337.315	0.0100725
		337.36	0.0101405
		337.405	0.0102088
		337.45	0.0102775
		337.495	0.0103464
		337.54	0.0104156
		337.585	0.0104852
		337.63	0.010555
		337.675	0.0106252
		337.72	0.0106956
		337.765	0.0107663
		337.81	0.0108374
		337.855	0.0109087
		337.9	0.0109804
		337.945	0.0110523
		337.99	0.0111246
		338.035	0.0111971
		338.08	0.01127
		338.125	0.0113431
		338.17	0.0114166
		338.215	0.0114903
		338.26	0.0115644
		338.305	0.0116387
		338.35	0.0117134
		338.395	0.0117883
		338.44	0.0118636
		338.485	0.0119391
		338.53	0.0120149
		338.575	0.0120911
		338.62	0.0121675
		338.665	0.0122442
		338.71	0.0123213
		338.755	0.0123986
		338.8	0.0124762
		338.845	0.0125541
		338.89	0.0126323
		338.935	0.0127107
		338.98	0.0127895
		339.025	0.0128686
		339.07	0.0129479
		339.115	0.0130276
		339.16	0.0131075
		339.205	0.0131877
		339.25	0.0132682
		339.295	0.013349
		339.34	0.01343
		339.385	0.0135113
		339.43	0.013593
		339.475	0.0136749
		339.52	0.013757
		339.565	0.0138395
		339.61	0.0139222
		339.655	0.0140052
		339.7	0.0140885
		339.745	0.014172
		339.79	0.0142558
		339.835	0.0143399
		339.88	0.0144242
		339.925	0.0145088
		339.97	0.0145937
		340.015	0.0146788
		340.06	0.0147642
		340.105	0.0148498
		340.15	0.0149357
		340.195	0.0150218
		340.24	0.0151082
		340.285	0.0151948
		340.33	0.0152817
		340.375	0.0153689
		340.42	0.0154562
		340.465	0.0155439
		340.51	0.0156317
		340.555	0.0157198
		340.6	0.0158081
		340.645	0.0158967
		340.69	0.0159855
		340.735	0.0160745
		340.78	0.0161637
		340.825	0.0162532
		340.87	0.0163429
		340.915	0.0164328
		340.96	0.0165229
		341.005	0.0166132
		341.05	0.0167037
		341.095	0.0167945
		341.14	0.0168854
		341.185	0.0169766
		341.23	0.0170679
		341.275	0.0171595
		341.32	0.0172512
		341.365	0.0173431
		341.41	0.0174352
		341.455	0.0175275
		341.5	0.01762
		341.545	0.0177127
		341.59	0.0178055
		341.635	0.0178985
		341.68	0.0179917
		341.725	0.018085
		341.77	0.0181785
		341.815	0.0182722
		341.86	0.018366
		341.905	0.01846
		341.95	0.0185541
		341.995	0.0186484
		342.04	0.0187428
		342.085	0.0188374
		342.13	0.018932
		342.175	0.0190269
		342.22	0.0191218
		342.265	0.0192169
		342.31	0.0193121
		342.355	0.0194074
		342.4	0.0195029
		342.445	0.0195984
		342.49	0.0196941
		342.535	0.0197899
		342.58	0.0198857
		342.625	0.0199817
		342.67	0.0200777
		342.715	0.0201739
		342.76	0.0202701
		342.805	0.0203664
		342.85	0.0204628
		342.895	0.0205593
		342.94	0.0206559
		342.985	0.0207525
		343.03	0.0208491
		343.075	0.0209459
		343.12	0.0210426
		343.165	0.0211395
		343.21	0.0212364
		343.255	0.0213333
		343.3	0.0214303
		343.345	0.0215273
		343.39	0.0216243
		343.435	0.0217214
		343.48	0.0218184
		343.525	0.0219156
		343.57	0.0220127
		343.615	0.0221098
		343.66	0.0222069
		343.705	0.0223041
		343.75	0.0224012
		343.795	0.0224983
		343.84	0.0225954
		343.885	0.0226926
		343.93	0.0227896
		343.975	0.0228867
		344.02	0.0229837
		344.065	0.0230807
		344.11	0.0231777
		344.155	0.0232746
		344.2	0.0233715
		344.245	0.0234683
		344.29	0.0235651
		344.335	0.0236619
		344.38	0.0237585
		344.425	0.0238551
		344.47	0.0239516
		344.515	0.0240481
		344.56	0.0241444
		344.605	0.0242407
		344.65	0.0243369
		344.695	0.024433
		344.74	0.024529
		344.785	0.0246249
		344.83	0.0247207
		344.875	0.0248164
		344.92	0.024912
		344.965	0.0250074
		345.01	0.0251028
		345.055	0.025198
		345.1	0.025293
		345.145	0.025388
		345.19	0.0254827
		345.235	0.0255774
		345.28	0.0256719
		345.325	0.0257662
		345.37	0.0258604
		345.415	0.0259544
		345.46	0.0260482
		345.505	0.0261419
		345.55	0.0262354
		345.595	0.0263287
		345.64	0.0264218
		345.685	0.0265148
		345.73	0.0266075
		345.775	0.0267
		345.82	0.0267924
		345.865	0.0268845
		345.91	0.0269764
		345.955	0.0270681
		346	0.0271596
		346.045	0.0272508
		346.09	0.0273418
		346.135	0.0274326
		346.18	0.0275231
		346.225	0.0276134
		346.27	0.0277034
		346.315	0.0277932
		346.36	0.0278827
		346.405	0.027972
		346.45	0.028061
		346.495	0.0281497
		346.54	0.0282382
		346.585	0.0283263
		346.63	0.0284142
		346.675	0.0285018
		346.72	0.0285891
		346.765	0.0286761
		346.81	0.0287628
		346.855	0.0288492
		346.9	0.0289353
		346.945	0.029021
		346.99	0.0291065
		347.035	0.0291916
		347.08	0.0292764
		347.125	0.0293608
		347.17	0.0294449
		347.215	0.0295287
		347.26	0.0296121
		347.305	0.0296952
		347.35	0.0297779
		347.395	0.0298603
		347.44	0.0299422
		347.485	0.0300239
		347.53	0.0301051
		347.575	0.030186
		347.62	0.0302665
		347.665	0.0303466
		347.71	0.0304263
		347.755	0.0305056
		347.8	0.0305846
		347.845	0.0306631
		347.89	0.0307412
		347.935	0.0308189
		347.98	0.0308962
		348.025	0.0309731
		348.07	0.0310495
		348.115	0.0311255
		348.16	0.0312011
		348.205	0.0312763
		348.25	0.031351
		348.295	0.0314252
		348.34	0.0314991
		348.385	0.0315724
		348.43	0.0316453
		348.475	0.0317178
		348.52	0.0317898
		348.565	0.0318613
		348.61	0.0319323
		348.655	0.0320029
		348.7	0.032073
		348.745	0.0321426
		348.79	0.0322117
		348.835	0.0322803
		348.88	0.0323485
		348.925	0.0324161
		348.97	0.0324832
		349.015	0.0325498
		349.06	0.0326159
		349.105	0.0326815
		349.15	0.0327466
		349.195	0.0328112
		349.24	0.0328752
		349.285	0.0329387
		349.33	0.0330017
		349.375	0.0330641
		349.42	0.033126
		349.465	0.0331873
		349.51	0.0332481
		349.555	0.0333084
		349.6	0.0333681
		349.645	0.0334272
		349.69	0.0334858
		349.735	0.0335438
		349.78	0.0336013
		349.825	0.0336581
		349.87	0.0337145
		349.915	0.0337702
		349.96	0.0338253
		350.005	0.0338799
		350.05	0.0339339
		350.095	0.0339872
		350.14	0.03404
		350.185	0.0340922
		350.23	0.0341438
		350.275	0.0341948
		350.32	0.0342452
		350.365	0.034295
		350.41	0.0343442
		350.455	0.0343927
		350.5	0.0344407
		350.545	0.034488
		350.59	0.0345347
		350.635	0.0345808
		350.68	0.0346263
		350.725	0.0346711
		350.77	0.0347153
		350.815	0.0347588
		350.86	0.0348018
		350.905	0.0348441
		350.95	0.0348857
		350.995	0.0349267
		351.04	0.0349671
		351.085	0.0350068
		351.13	0.0350458
		351.175	0.0350842
		351.22	0.035122
		351.265	0.0351591
		351.31	0.0351955
		351.355	0.0352313
		351.4	0.0352664
		351.445	0.0353009
		351.49	0.0353347
		351.535	0.0353678
		351.58	0.0354002
		351.625	0.035432
		351.67	0.0354631
		351.715	0.0354936
		351.76	0.0355233
		351.805	0.0355524
		351.85	0.0355808
		351.895	0.0356086
		351.94	0.0356356
		351.985	0.035662
		352.03	0.0356877
		352.075	0.0357127
		352.12	0.035737
		352.165	0.0357607
		352.21	0.0357837
		352.255	0.0358059
		352.3	0.0358275
		352.345	0.0358484
		352.39	0.0358686
		352.435	0.0358881
		352.48	0.035907
		352.525	0.0359251
		352.57	0.0359426
		352.615	0.0359593
		352.66	0.0359754
		352.705	0.0359908
		352.75	0.0360055
		352.795	0.0360195
		352.84	0.0360328
		352.885	0.0360454
		352.93	0.0360574
		352.975	0.0360686
		353.02	0.0360792
		353.065	0.036089
		353.11	0.0360982
		353.155	0.0361067
		353.2	0.0361145
		353.245	0.0361216
		353.29	0.0361281
		353.335	0.0361338
		353.38	0.0361389
		353.425	0.0361432
		353.47	0.0361469
		353.515	0.0361499
		353.56	0.0361522
		353.605	0.0361539
		353.65	0.0361548
		353.695	0.0361551
		353.74	0.0361547
		353.785	0.0361537
		353.83	0.0361519
		353.875	0.0361495
		353.92	0.0361464
		353.965	0.0361427
		354.01	0.0361383
		354.055	0.0361332
		354.1	0.0361274
		354.145	0.036121
		354.19	0.0361139
		354.235	0.0361062
		354.28	0.0360978
		354.325	0.0360888
		354.37	0.0360791
		354.415	0.0360687
		354.46	0.0360577
		354.505	0.0360461
		354.55	0.0360338
		354.595	0.0360209
		354.64	0.0360073
		354.685	0.0359931
		354.73	0.0359783
		354.775	0.0359628
		354.82	0.0359467
		354.865	0.03593
		354.91	0.0359126
		354.955	0.0358947
		355	0.0358761
		355.045	0.0358569
		355.09	0.0358371
		355.135	0.0358166
		355.18	0.0357956
		355.225	0.035774
		355.27	0.0357517
		355.315	0.0357289
		355.36	0.0357055
		355.405	0.0356815
		355.45	0.0356569
		355.495	0.0356317
		355.54	0.0356059
		355.585	0.0355796
		355.63	0.0355527
		355.675	0.0355252
		355.72	0.0354971
		355.765	0.0354685
		355.81	0.0354393
		355.855	0.0354096
		355.9	0.0353793
		355.945	0.0353485
		355.99	0.0353171
		356.035	0.0352852
		356.08	0.0352527
		356.125	0.0352197
		356.17	0.0351862
		356.215	0.0351521
		356.26	0.0351176
		356.305	0.0350825
		356.35	0.0350469
		356.395	0.0350107
		356.44	0.0349741
		356.485	0.034937
		356.53	0.0348994
		356.575	0.0348612
		356.62	0.0348226
		356.665	0.0347835
		356.71	0.0347439
		356.755	0.0347039
		356.8	0.0346633
		356.845	0.0346223
		356.89	0.0345808
		356.935	0.0345389
		356.98	0.0344965
		357.025	0.0344536
		357.07	0.0344103
		357.115	0.0343666
		357.16	0.0343224
		357.205	0.0342778
		357.25	0.0342327
		357.295	0.0341872
		357.34	0.0341413
		357.385	0.0340949
		357.43	0.0340482
		357.475	0.034001
		357.52	0.0339534
		357.565	0.0339055
		357.61	0.0338571
		357.655	0.0338083
		357.7	0.0337591
		357.745	0.0337096
		357.79	0.0336596
		357.835	0.0336093
		357.88	0.0335586
		357.925	0.0335075
		357.97	0.0334561
		358.015	0.0334043
		358.06	0.0333521
		358.105	0.0332996
		358.15	0.0332467
		358.195	0.0331935
		358.24	0.03314
		358.285	0.0330861
		358.33	0.0330318
		358.375	0.0329773
		358.42	0.0329224
		358.465	0.0328672
		358.51	0.0328117
		358.555	0.0327558
		358.6	0.0326997
		358.645	0.0326432
		358.69	0.0325864
		358.735	0.0325294
		358.78	0.032472
		358.825	0.0324144
		358.87	0.0323564
		358.915	0.0322982
		358.96	0.0322397
		359.005	0.032181
		359.05	0.0321219
		359.095	0.0320626
		359.14	0.032003
		359.185	0.0319432
		359.23	0.0318831
		359.275	0.0318227
		359.32	0.0317621
		359.365	0.0317013
		359.41	0.0316402
		359.455	0.0315788
		359.5	0.0315173
		359.545	0.0314555
		359.59	0.0313934
		359.635	0.0313312
		359.68	0.0312687
		359.725	0.031206
		359.77	0.0311431
		359.815	0.0310799
		359.86	0.0310166
		359.905	0.030953
		359.95	0.0308893
		359.995	0.0308254
		360.04	0.0307612
		360.085	0.0306969
		360.13	0.0306323
		360.175	0.0305676
		360.22	0.0305027
		360.265	0.0304376
		360.31	0.0303724
		360.355	0.0303069
		360.4	0.0302413
		360.445	0.0301756
		360.49	0.0301096
		360.535	0.0300435
		360.58	0.0299772
		360.625	0.0299108
		360.67	0.0298442
		360.715	0.0297775
		360.76	0.0297106
		360.805	0.0296436
		360.85	0.0295764
		360.895	0.0295091
		360.94	0.0294416
		360.985	0.029374
		361.03	0.0293063
		361.075	0.0292384
		361.12	0.0291704
		361.165	0.0291023
		361.21	0.029034
		361.255	0.0289657
		361.3	0.0288972
		361.345	0.0288285
		361.39	0.0287598
		361.435	0.028691
		361.48	0.028622
		361.525	0.0285529
		361.57	0.0284838
		361.615	0.0284145
		361.66	0.0283451
		361.705	0.0282756
		361.75	0.028206
		361.795	0.0281364
		361.84	0.0280666
		361.885	0.0279967
		361.93	0.0279268
		361.975	0.0278567
		362.02	0.0277866
		362.065	0.0277163
		362.11	0.027646
		362.155	0.0275756
		362.2	0.0275052
		362.245	0.0274346
		362.29	0.027364
		362.335	0.0272933
		362.38	0.0272225
		362.425	0.0271516
		362.47	0.0270807
		362.515	0.0270097
		362.56	0.0269386
		362.605	0.0268675
		362.65	0.0267963
		362.695	0.0267251
		362.74	0.0266537
		362.785	0.0265824
		362.83	0.0265109
		362.875	0.0264394
		362.92	0.0263679
		362.965	0.0262962
		363.01	0.0262246
		363.055	0.0261529
		363.1	0.0260811
		363.145	0.0260093
		363.19	0.0259374
		363.235	0.0258655
		363.28	0.0257935
		363.325	0.0257215
		363.37	0.0256494
		363.415	0.0255773
		363.46	0.0255052
		363.505	0.025433
		363.55	0.0253608
		363.595	0.0252885
		363.64	0.0252162
		363.685	0.0251439
		363.73	0.0250715
		363.775	0.0249991
		363.82	0.0249266
		363.865	0.0248541
		363.91	0.0247816
		363.955	0.0247091
		364	0.0246365
		364.045	0.0245639
		364.09	0.0244912
		364.135	0.0244186
		364.18	0.0243459
		364.225	0.0242732
		364.27	0.0242004
		364.315	0.0241277
		364.36	0.0240549
		364.405	0.023982
		364.45	0.0239092
		364.495	0.0238363
		364.54	0.0237635
		364.585	0.0236905
		364.63	0.0236176
		364.675	0.0235447
		364.72	0.0234717
		364.765	0.0233987
		364.81	0.0233257
		364.855	0.0232527
		364.9	0.0231797
		364.945	0.0231066
		364.99	0.0230336
		365.035	0.0229605
		365.08	0.0228874
		365.125	0.0228143
		365.17	0.0227412
		365.215	0.0226681
		365.26	0.0225949
		365.305	0.0225218
		365.35	0.0224486
		365.395	0.0223754
		365.44	0.0223023
		365.485	0.0222291
		365.53	0.0221559
		365.575	0.0220827
		365.62	0.0220095
		365.665	0.0219363
		365.71	0.0218631
		365.755	0.0217898
		365.8	0.0217166
		365.845	0.0216434
		365.89	0.0215701
		365.935	0.0214969
		365.98	0.0214236
		366.025	0.0213504
		366.07	0.0212772
		366.115	0.0212039
		366.16	0.0211307
		366.205	0.0210574
		366.25	0.0209842
		366.295	0.0209109
		366.34	0.0208377
		366.385	0.0207644
		366.43	0.0206912
		366.475	0.020618
		366.52	0.0205447
		366.565	0.0204715
		366.61	0.0203983
		366.655	0.020325
		366.7	0.0202518
		366.745	0.0201786
		366.79	0.0201054
		366.835	0.0200322
		366.88	0.019959
		366.925	0.0198858
		366.97	0.0198127
		367.015	0.0197395
		367.06	0.0196664
		367.105	0.0195932
		367.15	0.0195201
		367.195	0.019447
		367.24	0.0193739
		367.285	0.0193008
		367.33	0.0192277
		367.375	0.0191546
		367.42	0.0190815
		367.465	0.0190085
		367.51	0.0189355
		367.555	0.0188625
		367.6	0.0187895
		367.645	0.0187165
		367.69	0.0186435
		367.735	0.0185706
		367.78	0.0184977
		367.825	0.0184248
		367.87	0.0183519
		367.915	0.018279
		367.96	0.0182062
		368.005	0.0181334
		368.05	0.0180606
		368.095	0.0179878
		368.14	0.017915
		368.185	0.0178423
		368.23	0.0177696
		368.275	0.0176969
		368.32	0.0176243
		368.365	0.0175517
		368.41	0.0174791
		368.455	0.0174065
		368.5	0.017334
		368.545	0.0172615
		368.59	0.017189
		368.635	0.0171165
		368.68	0.0170441
		368.725	0.0169717
		368.77	0.0168994
		368.815	0.0168271
		368.86	0.0167548
		368.905	0.0166826
		368.95	0.0166104
		368.995	0.0165382
		369.04	0.0164661
		369.085	0.016394
		369.13	0.016322
		369.175	0.01625
		369.22	0.016178
		369.265	0.0161061
		369.31	0.0160342
		369.355	0.0159624
		369.4	0.0158906
		369.445	0.0158189
		369.49	0.0157472
		369.535	0.0156756
		369.58	0.015604
		369.625	0.0155324
		369.67	0.015461
		369.715	0.0153895
		369.76	0.0153181
		369.805	0.0152468
		369.85	0.0151756
		369.895	0.0151043
		369.94	0.0150332
		369.985	0.0149621
		370.03	0.0148911
		370.075	0.0148201
		370.12	0.0147492
		370.165	0.0146783
		370.21	0.0146075
		370.255	0.0145368
		370.3	0.0144661
		370.345	0.0143956
		370.39	0.014325
		370.435	0.0142546
		370.48	0.0141842
		370.525	0.0141139
		370.57	0.0140437
		370.615	0.0139735
		370.66	0.0139035
		370.705	0.0138335
		370.75	0.0137635
		370.795	0.0136937
		370.84	0.0136239
		370.885	0.0135542
		370.93	0.0134846
		370.975	0.0134151
		371.02	0.0133457
		371.065	0.0132764
		371.11	0.0132071
		371.155	0.0131379
		371.2	0.0130689
		371.245	0.0129999
		371.29	0.012931
		371.335	0.0128622
		371.38	0.0127935
		371.425	0.0127249
		371.47	0.0126564
		371.515	0.012588
		371.56	0.0125197
		371.605	0.0124515
		371.65	0.0123834
		371.695	0.0123154
		371.74	0.0122475
		371.785	0.0121797
		371.83	0.0121121
		371.875	0.0120445
		371.92	0.0119771
		371.965	0.0119097
		372.01	0.0118425
		372.055	0.0117754
		372.1	0.0117085
		372.145	0.0116416
		372.19	0.0115749
		372.235	0.0115082
		372.28	0.0114417
		372.325	0.0113754
		372.37	0.0113091
		372.415	0.011243
		372.46	0.011177
		372.505	0.0111112
		372.55	0.0110454
		372.595	0.0109798
		372.64	0.0109144
		372.685	0.0108491
		372.73	0.0107839
		372.775	0.0107188
		372.82	0.0106539
		372.865	0.0105892
		372.91	0.0105246
		372.955	0.0104601
		373	0.0103958
		373.045	0.0103316
		373.09	0.0102676
		373.135	0.0102037
		373.18	0.01014
		373.225	0.0100764
		373.27	0.010013
		373.315	0.00994974
		373.36	0.00988664
		373.405	0.0098237
		373.45	0.00976092
		373.495	0.00969831
		373.54	0.00963585
		373.585	0.00957356
		373.63	0.00951144
		373.675	0.00944949
		373.72	0.0093877
		373.765	0.00932609
		373.81	0.00926465
		373.855	0.00920338
		373.9	0.00914229
		373.945	0.00908137
		373.99	0.00902063
		374.035	0.00896007
		374.08	0.00889968
		374.125	0.00883948
		374.17	0.00877946
		374.215	0.00871963
		374.26	0.00865999
		374.305	0.00860053
		374.35	0.00854126
		374.395	0.00848218
		374.44	0.00842329
		374.485	0.00836459
		374.53	0.00830608
		374.575	0.00824777
		374.62	0.00818966
		374.665	0.00813174
		374.71	0.00807402
		374.755	0.0080165
		374.8	0.00795918
		374.845	0.00790207
		374.89	0.00784515
		374.935	0.00778844
		374.98	0.00773194
		375.025	0.00767564
		375.07	0.00761955
		375.115	0.00756367
		375.16	0.007508
		375.205	0.00745254
		375.25	0.0073973
		375.295	0.00734226
		375.34	0.00728744
		375.385	0.00723284
		375.43	0.00717845
		375.475	0.00712428
		375.52	0.00707033
		375.565	0.00701659
		375.61	0.00696308
		375.655	0.00690979
		375.7	0.00685672
		375.745	0.00680388
		375.79	0.00675125
		375.835	0.00669884
		375.88	0.00664668
		375.925	0.00659473
		375.97	0.00654302
		376.015	0.00649153
		376.06	0.00644027
		376.105	0.00638924
		376.15	0.00633845
		376.195	0.00628788
		376.24	0.00623755
		376.285	0.00618745
		376.33	0.00613758
		376.375	0.00608795
		376.42	0.00603856
		376.465	0.0059894
		376.51	0.00594047
		376.555	0.00589179
		376.6	0.00584333
		376.645	0.00579512
		376.69	0.00574715
		376.735	0.00569942
		376.78	0.00565193
		376.825	0.00560468
		376.87	0.00555767
		376.915	0.0055109
		376.96	0.00546438
		377.005	0.0054181
		377.05	0.00537206
		377.095	0.00532626
		377.14	0.00528071
		377.185	0.0052354
		377.23	0.00519034
		377.275	0.00514551
		377.32	0.00510094
		377.365	0.00505661
		377.41	0.00501253
		377.455	0.0049687
		377.5	0.0049251
		377.545	0.00488176
		377.59	0.00483866
		377.635	0.00479582
		377.68	0.00475322
		377.725	0.00471085
		377.77	0.00466875
		377.815	0.00462689
		377.86	0.00458529
		377.905	0.00454393
		377.95	0.00450281
		377.995	0.00446195
		378.04	0.00442132
		378.085	0.00438095
		378.13	0.00434083
		378.175	0.00430096
		378.22	0.00426134
		378.265	0.00422195
		378.31	0.00418282
		378.355	0.00414394
		378.4	0.00410531
		378.445	0.00406692
		378.49	0.00402879
		378.535	0.0039909
		378.58	0.00395325
		378.625	0.00391586
		378.67	0.00387871
		378.715	0.00384181
		378.76	0.00380515
		378.805	0.00376874
		378.85	0.00373257
		378.895	0.00369665
		378.94	0.00366098
		378.985	0.00362555
		379.03	0.00359036
		379.075	0.00355542
		379.12	0.00352072
		379.165	0.00348626
		379.21	0.00345205
		379.255	0.00341808
		379.3	0.00338435
		379.345	0.00335086
		379.39	0.00331762
		379.435	0.00328461
		379.48	0.00325184
		379.525	0.00321932
		379.57	0.00318703
		379.615	0.00315498
		379.66	0.00312317
		379.705	0.00309159
		379.75	0.00306025
		379.795	0.00302915
		379.84	0.00299828
		379.885	0.00296765
		379.93	0.00293724
		379.975	0.00290707
		380.02	0.00287714
		380.065	0.00284744
		380.11	0.00281795
		380.155	0.0027887
		380.2	0.00275969
		380.245	0.00273091
		380.29	0.00270236
		380.335	0.00267404
		380.38	0.00264594
		380.425	0.00261807
		380.47	0.00259043
		380.515	0.002563
		380.56	0.00253581
		380.605	0.00250882
		380.65	0.00248205
		380.695	0.00245552
		380.74	0.0024292
		380.785	0.00240311
		380.83	0.00237724
		380.875	0.00235158
		380.92	0.00232614
		380.965	0.00230091
		381.01	0.0022759
		381.055	0.0022511
		381.1	0.00222652
		381.145	0.00220215
		381.19	0.00217799
		381.235	0.00215403
		381.28	0.00213029
		381.325	0.00210676
		381.37	0.00208343
		381.415	0.0020603
		381.46	0.00203739
		381.505	0.00201467
		381.55	0.00199216
		381.595	0.00196985
		381.64	0.00194775
		381.685	0.00192584
		381.73	0.00190413
		381.775	0.00188261
		381.82	0.0018613
		381.865	0.00184018
		381.91	0.00181925
		381.955	0.00179852
		382	0.00177798
		382.045	0.00175763
		382.09	0.00173747
		382.135	0.0017175
		382.18	0.00169772
		382.225	0.00167811
		382.27	0.00165871
		382.315	0.00163948
		382.36	0.00162044
		382.405	0.00160158
		382.45	0.00158291
		382.495	0.00156441
		382.54	0.00154609
		382.585	0.00152795
		382.63	0.00150999
		382.675	0.0014922
		382.72	0.00147459
		382.765	0.00145713
		382.81	0.00143987
		382.855	0.00142277
		382.9	0.00140583
		382.945	0.00138907
		382.99	0.00137248
		383.035	0.00135606
		383.08	0.0013398
		383.125	0.00132371
		383.17	0.00130778
		383.215	0.00129201
		383.26	0.0012764
		383.305	0.00126095
		383.35	0.00124566
		383.395	0.00123053
		383.44	0.00121556
		383.485	0.00120073
		383.53	0.00118607
		383.575	0.00117155
		383.62	0.00115719
		383.665	0.00114298
		383.71	0.00112891
		383.755	0.001115
		383.8	0.00110123
		383.845	0.00108761
		383.89	0.00107413
		383.935	0.0010608
		383.98	0.0010476
		384.025	0.00103455
		384.07	0.00102163
		384.115	0.00100886
		384.16	0.000996229
		384.205	0.000983733
		384.25	0.000971374
		384.295	0.000959149
		384.34	0.000947057
		384.385	0.000935098
		384.43	0.000923257
		384.475	0.000911546
		384.52	0.000899978
		384.565	0.000888539
		384.61	0.000877226
		384.655	0.000866039
		384.7	0.000854977
		384.745	0.000844038
		384.79	0.000833209
		384.835	0.000822515
		384.88	0.000811941
		384.925	0.000801474
		384.97	0.000791138
		385.015	0.000780906
		385.06	0.000770805
		385.105	0.000760791
		385.15	0.00075092
		385.195	0.000741161
		385.24	0.000731515
		385.285	0.000721979
		385.33	0.000712554
		385.375	0.000703237
		385.42	0.000694029
		385.465	0.000684927
		385.51	0.000675931
		385.555	0.00066704
		385.6	0.000658253
		385.645	0.00064957
		385.69	0.000640988
		385.735	0.000632507
		385.78	0.000624126
		385.825	0.000615844
		385.87	0.00060766
		385.915	0.000599574
		385.96	0.000591584
		386.005	0.000583675
		386.05	0.000575875
		386.095	0.000568168
		386.14	0.000560553
		386.185	0.00055303
		386.23	0.000545585
		386.275	0.000538242
		386.32	0.000530989
		386.365	0.00052381
		386.41	0.000516732
		386.455	0.00050974
		386.5	0.000502833
		386.545	0.000496011
		386.59	0.000489272
		386.635	0.000482616
		386.68	0.000476042
		386.725	0.000469548
		386.77	0.000463135
		386.815	0.000456787
		386.86	0.000450532
		386.905	0.000444354
		386.95	0.000438253
		386.995	0.000432228
		387.04	0.000426278
		387.085	0.000420403
		387.13	0.000414601
		387.175	0.000408872
		387.22	0.000403215
		387.265	0.000397629
		387.31	0.000392113
		387.355	0.000386667
		387.4	0.00038129
		387.445	0.000375981
		387.49	0.00037074
		387.535	0.000365565
		387.58	0.000360456
		387.625	0.000355413
		387.67	0.000350434
		387.715	0.000345518
		387.76	0.000340666
		387.805	0.000335876
		387.85	0.000331148
		387.895	0.00032648
		387.94	0.000321873
		387.985	0.000317312
		388.03	0.000312824
		388.075	0.000308394
		388.12	0.000304022
		388.165	0.000299706
		388.21	0.000295434
		388.255	0.00029123
		388.3	0.000287082
		388.345	0.000282988
		388.39	0.000278948
		388.435	0.000274947
		388.48	0.000271012
		388.525	0.00026713
		388.57	0.000263298
		388.615	0.000259518
		388.66	0.000255787
		388.705	0.000252106
		388.75	0.000248473
		388.795	0.000244889
		388.84	0.000241353
		388.885	0.000237863
		388.93	0.000234407
		388.975	0.000231011
		389.02	0.00022766
		389.065	0.000224355
		389.11	0.000221093
		389.155	0.000217875
		389.2	0.000214701
		389.245	0.00021157
		389.29	0.000208481
		389.335	0.000205433
		389.38	0.000202427
		389.425	0.000199462
		389.47	0.000196536
		389.515	0.000193651
		389.56	0.000190791
		389.605	0.000187985
		389.65	0.000185216
		389.695	0.000182485
		389.74	0.000179792
		389.785	0.000177136
		389.83	0.000174516
		389.875	0.000171932
		389.92	0.000169383
		389.965	0.00016687
		390.01	0.000164391
		390.055	0.000161947
		390.1	0.000159536
		390.145	0.000157145
		390.19	0.000154801
		390.235	0.00015249
		390.28	0.000150211
		390.325	0.000147963
		390.37	0.000145747
		390.415	0.000143562
		390.46	0.000141407
		390.505	0.000139283
		390.55	0.000137188
		390.595	0.000135122
		390.64	0.000133072
		390.685	0.000131065
		390.73	0.000129085
		390.775	0.000127134
		390.82	0.00012521
		390.865	0.000123313
		390.91	0.000121444
		390.955	0.000119587
		391	0.000117756
		391.045	0.000115965
		391.09	0.0001142
		391.135	0.00011246
		391.18	0.000110744
		391.225	0.000109053
		391.27	0.000107373
		391.315	0.00010573
		391.36	0.000104111
		391.405	0.000102515
		391.45	0.000100928
		391.495	9.93779e-05
		391.54	9.78499e-05
		391.585	9.63439e-05
		391.63	9.48596e-05
		391.675	9.33966e-05
		391.72	9.19548e-05
		391.765	9.05338e-05
		391.81	8.91333e-05
		391.855	8.77396e-05
		391.9	8.63797e-05
		391.945	8.50396e-05
		391.99	8.3719e-05
		392.035	8.24176e-05
		392.08	8.11351e-05
		392.125	7.98713e-05
		392.17	7.8626e-05
		392.215	7.73989e-05
		392.26	7.61762e-05
		392.305	7.49851e-05
		392.35	7.3798e-05
		392.395	7.26419e-05
		392.44	7.15029e-05
		392.485	7.03805e-05
		392.53	6.92747e-05
		392.575	6.81852e-05
		392.62	6.71118e-05
		392.665	6.60542e-05
		392.71	6.50122e-05
		392.755	6.39857e-05
		392.8	6.29743e-05
		392.845	6.1978e-05
		392.89	6.09964e-05
		392.935	6.00295e-05
		392.98	5.90769e-05
		393.025	5.81385e-05
		393.07	5.72141e-05
		393.115	5.63036e-05
		393.16	5.54066e-05
		393.205	5.4523e-05
		393.25	5.36527e-05
		393.295	5.27818e-05
		393.34	5.19378e-05
		393.385	5.11065e-05
		393.43	5.02878e-05
		393.475	4.94813e-05
		393.52	4.8687e-05
		393.565	4.78911e-05
		393.61	4.71209e-05
		393.655	4.63624e-05
		393.7	4.56153e-05
		393.745	4.48796e-05
		393.79	4.4155e-05
		393.835	4.34414e-05
		393.88	4.27386e-05
		393.925	4.20465e-05
		393.97	4.1365e-05
		394.015	4.06939e-05
		394.06	4.0033e-05
		394.105	3.93822e-05
		394.15	3.87413e-05
		394.195	3.81103e-05
		394.24	3.74889e-05
		394.285	3.68771e-05
		394.33	3.62747e-05
		394.375	3.56815e-05
		394.42	3.50974e-05
		394.465	3.45224e-05
		394.51	3.39562e-05
		394.555	3.33853e-05
		394.6	3.28369e-05
		394.645	3.22969e-05
		394.69	3.17653e-05
		394.735	3.12419e-05
		394.78	3.07267e-05
		394.825	3.02195e-05
		394.87	2.97201e-05
		394.915	2.92285e-05
		394.96	2.87446e-05
		395.005	2.82682e-05
		395.05	2.77993e-05
		395.095	2.73377e-05
		395.14	2.68833e-05
		395.185	2.6436e-05
		395.23	2.59958e-05
		395.275	2.55625e-05
		395.32	2.51359e-05
		395.365	2.47161e-05
		395.41	2.43029e-05
		395.455	2.38962e-05
		395.5	2.34959e-05
		395.545	2.3102e-05
		395.59	2.27143e-05
		395.635	2.23327e-05
		395.68	2.19572e-05
		395.725	2.15876e-05
		395.77	2.12239e-05
		395.815	2.08659e-05
		395.86	2.05137e-05
		395.905	2.01671e-05
		395.95	1.9826e-05
		395.995	1.94904e-05
		396.04	1.91601e-05
		396.085	1.88351e-05
		396.13	1.85153e-05
		396.175	1.82006e-05
		396.22	1.7891e-05
		396.265	1.75864e-05
		396.31	1.72595e-05
		396.355	1.69653e-05
		396.4	1.66759e-05
		396.445	1.63911e-05
		396.49	1.61109e-05
		396.535	1.58353e-05
		396.58	1.55641e-05
		396.625	1.52972e-05
		396.67	1.50347e-05
		396.715	1.47765e-05
		396.76	1.45224e-05
		396.805	1.42725e-05
		396.85	1.40266e-05
		396.895	1.37848e-05
		396.94	1.35469e-05
		396.985	1.33128e-05
		397.03	1.30826e-05
		397.075	1.28562e-05
		397.12	1.26334e-05
		397.165	1.24143e-05
		397.21	1.21988e-05
		397.255	1.19868e-05
		397.3	1.17784e-05
		397.345	1.15733e-05
		397.39	1.13716e-05
		397.435	1.11733e-05
		397.48	1.09782e-05
		397.525	1.07864e-05
		397.57	1.05977e-05
		397.615	1.03985e-05
		397.66	1.02164e-05
		397.705	1.00373e-05
		397.75	9.86126e-06
		397.795	9.67449e-06
		397.84	9.50457e-06
		397.885	9.32392e-06
		397.93	9.15989e-06
		397.975	8.9986e-06
		398.02	8.83999e-06
		398.065	8.68403e-06
		398.11	8.51724e-06
		398.155	8.3668e-06
		398.2	8.21888e-06
		398.245	8.07344e-06
		398.29	7.93043e-06
		398.335	7.78982e-06
		398.38	7.62485e-06
		398.425	7.48987e-06
		398.47	7.35715e-06
		398.515	7.22664e-06
		398.56	7.09832e-06
		398.605	6.97215e-06
		398.65	6.8481e-06
		398.695	6.72613e-06
		398.74	6.60622e-06
		398.785	6.48832e-06
		398.83	6.37241e-06
		398.875	6.25846e-06
		398.92	6.14644e-06
		398.965	6.03631e-06
		399.01	5.92804e-06
		399.055	5.82162e-06
		399.1	5.717e-06
		399.145	5.61415e-06
		399.19	5.51306e-06
		399.235	5.41369e-06
		399.28	5.31602e-06
		399.325	5.22001e-06
		399.37	5.12565e-06
		399.415	5.0329e-06
		399.46	4.94174e-06
		399.505	4.85214e-06
		399.55	4.76408e-06
		399.595	4.67754e-06
		399.64	4.59249e-06
		399.685	4.5089e-06
		399.73	4.42675e-06
		399.775	4.34603e-06
		399.82	4.25327e-06
		399.865	4.17568e-06
		399.91	4.09944e-06
		399.955	4.02452e-06
[truncated: 1 more rows]

## Sheet: PlotDat8
Source sheet	data	310	1.2008e-06
Plot name	ProbDens8	310.05	1.23837e-06
Plot Type	16	310.1	1.27705e-06
1st free col	5	310.15	1.31686e-06
Sigma Level	2	310.2	1.35785e-06
Absolute Errs	TRUE	310.25	1.40004e-06
Symbol Type	5	310.3	1.44346e-06
Inverse Plot	FALSE	310.35	1.48816e-06
Color Plot	FALSE	310.4	1.53416e-06
3D plot	FALSE	310.45	1.5815e-06
Linear	FALSE	310.5	1.63021e-06
Data Range	AD509:AE548	310.55	1.68034e-06
Filled Symbols	TRUE	310.6	1.73192e-06
ConcAge	FALSE	310.65	1.78499e-06
ConcSwap	FALSE	310.7	1.83959e-06
1st Symbol-row	1	310.75	1.92085e-06
		310.8	1.97929e-06
		310.85	2.03941e-06
		310.9	2.10125e-06
		310.95	2.16485e-06
		311	2.23026e-06
		311.05	2.29752e-06
		311.1	2.36668e-06
		311.15	2.4378e-06
		311.2	2.51093e-06
		311.25	2.58611e-06
		311.3	2.6634e-06
		311.35	2.74286e-06
		311.4	2.82454e-06
		311.45	2.9085e-06
		311.5	2.99479e-06
		311.55	3.08348e-06
		311.6	3.17463e-06
		311.65	3.2683e-06
		311.7	3.36455e-06
		311.75	3.46345e-06
		311.8	3.56507e-06
		311.85	3.66948e-06
		311.9	3.77674e-06
		311.95	3.88693e-06
		312	4.00011e-06
		312.05	4.11638e-06
		312.1	4.23579e-06
		312.15	4.35844e-06
		312.2	4.48439e-06
		312.25	4.61373e-06
		312.3	4.74655e-06
		312.35	4.88293e-06
		312.4	5.02296e-06
		312.45	5.16672e-06
		312.5	5.31431e-06
		312.55	5.46582e-06
		312.6	5.62134e-06
		312.65	5.78097e-06
		312.7	5.94482e-06
		312.75	6.11297e-06
		312.8	6.28554e-06
		312.85	6.46263e-06
		312.9	6.64434e-06
		312.95	6.83079e-06
		313	7.02209e-06
		313.05	7.21835e-06
		313.1	7.41969e-06
		313.15	7.62623e-06
		313.2	7.83809e-06
		313.25	8.05539e-06
		313.3	8.27826e-06
		313.35	8.50683e-06
		313.4	8.74123e-06
		313.45	8.98159e-06
		313.5	9.22805e-06
		313.55	9.48075e-06
		313.6	9.73984e-06
		313.65	1.00055e-05
		313.7	1.02777e-05
		313.75	1.05569e-05
		313.8	1.08429e-05
		313.85	1.11362e-05
		313.9	1.14367e-05
		313.95	1.17447e-05
		314	1.20603e-05
		314.05	1.23837e-05
		314.1	1.2715e-05
		314.15	1.30545e-05
		314.2	1.34024e-05
		314.25	1.37587e-05
		314.3	1.41237e-05
		314.35	1.44976e-05
		314.4	1.48805e-05
		314.45	1.52727e-05
		314.5	1.57e-05
		314.55	1.61123e-05
		314.6	1.65345e-05
		314.65	1.69669e-05
		314.7	1.74096e-05
		314.75	1.78629e-05
		314.8	1.83269e-05
		314.85	1.88019e-05
		314.9	1.92882e-05
		314.95	1.97859e-05
		315	2.02954e-05
		315.05	2.08168e-05
		315.1	2.13503e-05
		315.15	2.18964e-05
		315.2	2.24551e-05
		315.25	2.30269e-05
		315.3	2.36118e-05
		315.35	2.42102e-05
		315.4	2.48225e-05
		315.45	2.54487e-05
		315.5	2.60893e-05
		315.55	2.67446e-05
		315.6	2.74147e-05
		315.65	2.81e-05
		315.7	2.88009e-05
		315.75	2.95432e-05
		315.8	3.02769e-05
		315.85	3.10271e-05
		315.9	3.17941e-05
		315.95	3.25782e-05
		316	3.33798e-05
		316.05	3.41991e-05
		316.1	3.50366e-05
		316.15	3.58926e-05
		316.2	3.67674e-05
		316.25	3.76615e-05
		316.3	3.8575e-05
		316.35	3.95085e-05
		316.4	4.04624e-05
		316.45	4.14369e-05
		316.5	4.24324e-05
		316.55	4.34495e-05
		316.6	4.44884e-05
		316.65	4.55495e-05
		316.7	4.66334e-05
		316.75	4.77403e-05
		316.8	4.88708e-05
		316.85	5.00251e-05
		316.9	5.12039e-05
		316.95	5.24075e-05
		317	5.36363e-05
		317.05	5.48908e-05
		317.1	5.61715e-05
		317.15	5.74788e-05
		317.2	5.88132e-05
		317.25	6.01751e-05
		317.3	6.15651e-05
		317.35	6.29837e-05
		317.4	6.44313e-05
		317.45	6.59084e-05
		317.5	6.74156e-05
		317.55	6.89533e-05
		317.6	7.05221e-05
		317.65	7.21226e-05
		317.7	7.37551e-05
		317.75	7.54203e-05
		317.8	7.71188e-05
		317.85	7.8851e-05
		317.9	8.06176e-05
		317.95	8.24191e-05
		318	8.4256e-05
		318.05	8.61291e-05
		318.1	8.80387e-05
		318.15	8.99856e-05
		318.2	9.19704e-05
		318.25	9.39935e-05
		318.3	9.6081e-05
		318.35	9.81835e-05
		318.4	0.000100326
		318.45	0.00010251
		318.5	0.000104736
		318.55	0.000107003
		318.6	0.000109314
		318.65	0.000111668
		318.7	0.000114091
		318.75	0.000116562
		318.8	0.000119053
		318.85	0.000121591
		318.9	0.000124175
		318.95	0.000126808
		319	0.000129489
		319.05	0.000132219
		319.1	0.000135
		319.15	0.000137831
		319.2	0.000140713
		319.25	0.000143673
		319.3	0.000146662
		319.35	0.000149704
		319.4	0.000152801
		319.45	0.000155953
		319.5	0.000159162
		319.55	0.000162427
		319.6	0.00016575
		319.65	0.000169131
		319.7	0.000172572
		319.75	0.000176073
		319.8	0.00017966
		319.85	0.000183285
		319.9	0.000186972
		319.95	0.000190723
		320	0.000194539
		320.05	0.00019842
		320.1	0.000202367
		320.15	0.00020638
		320.2	0.000210462
		320.25	0.000214613
		320.3	0.000218833
		320.35	0.000223124
		320.4	0.000227487
		320.45	0.000231922
		320.5	0.00023643
		320.55	0.000241012
		320.6	0.00024567
		320.65	0.000250404
		320.7	0.000255215
		320.75	0.000260104
		320.8	0.000265073
		320.85	0.000270121
		320.9	0.00027525
		320.95	0.000280461
		321	0.000285755
		321.05	0.000291133
		321.1	0.000296596
		321.15	0.000302145
		321.2	0.00030778
		321.25	0.000313504
		321.3	0.000319317
		321.35	0.000325219
		321.4	0.000331213
		321.45	0.000337298
		321.5	0.000343477
		321.55	0.00034975
		321.6	0.000356118
		321.65	0.000362582
		321.7	0.000369169
		321.75	0.00037583
		321.8	0.00038259
		321.85	0.000389451
		321.9	0.000396413
		321.95	0.000403478
		322	0.000410647
		322.05	0.000417946
		322.1	0.000425326
		322.15	0.000432814
		322.2	0.000440409
		322.25	0.000448114
		322.3	0.000455929
		322.35	0.000463855
		322.4	0.000471894
		322.45	0.000480047
		322.5	0.000488314
		322.55	0.000496698
		322.6	0.000505198
		322.65	0.000513817
		322.7	0.000522555
		322.75	0.000531413
		322.8	0.000540393
		322.85	0.000549496
		322.9	0.000558722
		322.95	0.000568074
		323	0.000577551
		323.05	0.000587156
		323.1	0.00059689
		323.15	0.000606753
		323.2	0.000616746
		323.25	0.000626872
		323.3	0.000637131
		323.35	0.000647523
		323.4	0.000658051
		323.45	0.000668716
		323.5	0.000679518
		323.55	0.000690459
		323.6	0.000701566
		323.65	0.000712814
		323.7	0.000724181
		323.75	0.00073569
		323.8	0.000747345
		323.85	0.000759145
		323.9	0.000771092
		323.95	0.000783187
		324	0.000795431
		324.05	0.000807826
		324.1	0.000820373
		324.15	0.000833098
		324.2	0.000845952
		324.25	0.000858961
		324.3	0.000872126
		324.35	0.000885449
		324.4	0.00089893
		324.45	0.000912571
		324.5	0.000926373
		324.55	0.000940337
		324.6	0.000954489
		324.65	0.000968781
		324.7	0.000983239
		324.75	0.000997863
		324.8	0.00101265
		324.85	0.00102762
		324.9	0.00104275
		324.95	0.00105807
		325	0.00107357
		325.05	0.00108922
		325.1	0.00110505
		325.15	0.00112105
		325.2	0.00113722
		325.25	0.00115358
		325.3	0.00117011
		325.35	0.00118682
		325.4	0.00120372
		325.45	0.00122082
		325.5	0.00123808
		325.55	0.00125553
		325.6	0.00127316
		325.65	0.00129098
		325.7	0.00130898
		325.75	0.00132718
		325.8	0.00134556
		325.85	0.00136414
		325.9	0.00138291
		325.95	0.00140187
		326	0.00142103
		326.05	0.00144038
		326.1	0.00145993
		326.15	0.00147968
		326.2	0.00149962
		326.25	0.00151977
		326.3	0.00154012
		326.35	0.00156066
		326.4	0.00158142
		326.45	0.00160237
		326.5	0.00162356
		326.55	0.00164492
		326.6	0.0016665
		326.65	0.00168828
		326.7	0.00171027
		326.75	0.00173247
		326.8	0.00175488
		326.85	0.00177751
		326.9	0.00180035
		326.95	0.0018234
		327	0.00184667
		327.05	0.00187015
		327.1	0.00189386
		327.15	0.00191778
		327.2	0.00194192
		327.25	0.00196628
		327.3	0.00199086
		327.35	0.00201569
		327.4	0.00204072
		327.45	0.00206597
		327.5	0.00209145
		327.55	0.00211715
		327.6	0.00214308
		327.65	0.00216924
		327.7	0.00219565
		327.75	0.00222228
		327.8	0.00224913
		327.85	0.00227624
		327.9	0.00230355
		327.95	0.00233111
		328	0.00235889
		328.05	0.00238692
		328.1	0.00241518
		328.15	0.00244367
		328.2	0.00247241
		328.25	0.00250141
		328.3	0.00253063
		328.35	0.00256009
		328.4	0.0025898
		328.45	0.00261975
		328.5	0.00264994
		328.55	0.00268038
		328.6	0.00271106
		328.65	0.00274199
		328.7	0.00277317
		328.75	0.0028046
		328.8	0.00283628
		328.85	0.00286821
		328.9	0.0029004
		328.95	0.00293284
		329	0.00296553
		329.05	0.00299847
		329.1	0.00303167
		329.15	0.00306513
		329.2	0.00309885
		329.25	0.00313283
		329.3	0.00316706
		329.35	0.00320156
		329.4	0.00323631
		329.45	0.00327133
		329.5	0.00330661
		329.55	0.00334216
		329.6	0.00337797
		329.65	0.00341405
		329.7	0.00345039
		329.75	0.003487
		329.8	0.00352389
		329.85	0.00356104
		329.9	0.00359846
		329.95	0.00363615
		330	0.00367411
		330.05	0.00371235
		330.1	0.00375086
		330.15	0.00378965
		330.2	0.00382871
		330.25	0.00386805
		330.3	0.00390766
		330.35	0.00394756
		330.4	0.00398773
		330.45	0.00402818
		330.5	0.00406892
		330.55	0.00410993
		330.6	0.00415123
		330.65	0.00419281
		330.7	0.00423468
		330.75	0.00427683
		330.8	0.00431927
		330.85	0.00436199
		330.9	0.004405
		330.95	0.0044483
		331	0.00449189
		331.05	0.00453582
		331.1	0.00457999
		331.15	0.00462445
		331.2	0.0046692
		331.25	0.00471425
		331.3	0.00475961
		331.35	0.00480524
		331.4	0.00485117
		331.45	0.0048974
		331.5	0.00494392
		331.55	0.00499074
		331.6	0.00503786
		331.65	0.00508527
		331.7	0.00513299
		331.75	0.005181
		331.8	0.00522932
		331.85	0.00527793
		331.9	0.00532685
		331.95	0.00537606
		332	0.00542559
		332.05	0.00547541
		332.1	0.00552554
		332.15	0.00557597
		332.2	0.0056267
		332.25	0.00567775
		332.3	0.00572909
		332.35	0.00578074
		332.4	0.0058327
		332.45	0.00588497
		332.5	0.00593754
		332.55	0.00599042
		332.6	0.0060436
		332.65	0.0060971
		332.7	0.0061509
		332.75	0.00620501
		332.8	0.00625943
		332.85	0.00631415
		332.9	0.00636922
		332.95	0.00642456
		333	0.00648022
		333.05	0.00653618
		333.1	0.00659245
		333.15	0.00664903
		333.2	0.00670592
		333.25	0.00676312
		333.3	0.00682063
		333.35	0.00687844
		333.4	0.00693657
		333.45	0.006995
		333.5	0.00705376
		333.55	0.00711281
		333.6	0.00717216
		333.65	0.00723182
		333.7	0.00729179
		333.75	0.00735206
		333.8	0.00741264
		333.85	0.00747352
		333.9	0.00753471
		333.95	0.0075962
		334	0.00765799
		334.05	0.00772009
		334.1	0.00778248
		334.15	0.00784518
		334.2	0.0079082
		334.25	0.00797149
		334.3	0.00803511
		334.35	0.008099
		334.4	0.00816318
		334.45	0.00822766
		334.5	0.00829243
		334.55	0.00835749
		334.6	0.00842284
		334.65	0.00848848
		334.7	0.00855441
		334.75	0.00862063
		334.8	0.00868713
		334.85	0.00875391
		334.9	0.00882097
		334.95	0.00888832
		335	0.00895594
		335.05	0.00902383
		335.1	0.009092
		335.15	0.00916044
		335.2	0.00922916
		335.25	0.00929814
		335.3	0.00936738
		335.35	0.00943689
		335.4	0.00950666
		335.45	0.00957669
		335.5	0.00964697
		335.55	0.00971751
		335.6	0.0097883
		335.65	0.00985934
		335.7	0.00993063
		335.75	0.0100022
		335.8	0.0100739
		335.85	0.0101459
		335.9	0.0102182
		335.95	0.0102907
		336	0.0103634
		336.05	0.0104363
		336.1	0.0105094
		336.15	0.0105828
		336.2	0.0106564
		336.25	0.0107302
		336.3	0.0108042
		336.35	0.0108784
		336.4	0.0109528
		336.45	0.0110274
		336.5	0.0111022
		336.55	0.0111772
		336.6	0.0112524
		336.65	0.0113278
		336.7	0.0114033
		336.75	0.0114791
		336.8	0.011555
		336.85	0.011631
		336.9	0.0117072
		336.95	0.0117836
		337	0.0118602
		337.05	0.0119368
		337.1	0.0120137
		337.15	0.0120906
		337.2	0.0121677
		337.25	0.012245
		337.3	0.0123223
		337.35	0.0123998
		337.4	0.0124774
		337.45	0.0125552
		337.5	0.012633
		337.55	0.0127109
		337.6	0.012789
		337.65	0.0128671
		337.7	0.0129453
		337.75	0.0130236
		337.8	0.0131019
		337.85	0.0131804
		337.9	0.0132589
		337.95	0.0133374
		338	0.013416
		338.05	0.0134947
		338.1	0.0135734
		338.15	0.0136522
		338.2	0.0137309
		338.25	0.0138098
		338.3	0.0138886
		338.35	0.0139675
		338.4	0.0140463
		338.45	0.0141252
		338.5	0.0142041
		338.55	0.0142829
		338.6	0.0143618
		338.65	0.0144406
		338.7	0.0145194
		338.75	0.0145982
		338.8	0.014677
		338.85	0.0147557
		338.9	0.0148344
		338.95	0.014913
		339	0.0149916
		339.05	0.0150701
		339.1	0.0151485
		339.15	0.0152268
		339.2	0.0153051
		339.25	0.0153833
		339.3	0.0154614
		339.35	0.0155394
		339.4	0.0156173
		339.45	0.0156951
		339.5	0.0157728
		339.55	0.0158503
		339.6	0.0159278
		339.65	0.0160051
		339.7	0.0160822
		339.75	0.0161592
		339.8	0.0162361
		339.85	0.0163128
		339.9	0.0163894
		339.95	0.0164658
		340	0.016542
		340.05	0.016618
		340.1	0.0166939
		340.15	0.0167696
		340.2	0.0168451
		340.25	0.0169203
		340.3	0.0169954
		340.35	0.0170703
		340.4	0.017145
		340.45	0.0172194
		340.5	0.0172937
		340.55	0.0173677
		340.6	0.0174414
		340.65	0.017515
		340.7	0.0175883
		340.75	0.0176613
		340.8	0.0177341
		340.85	0.0178066
		340.9	0.0178789
		340.95	0.0179509
		341	0.0180227
		341.05	0.0180941
		341.1	0.0181653
		341.15	0.0182363
		341.2	0.0183069
		341.25	0.0183772
		341.3	0.0184473
		341.35	0.018517
		341.4	0.0185865
		341.45	0.0186556
		341.5	0.0187245
		341.55	0.018793
		341.6	0.0188612
		341.65	0.0189291
		341.7	0.0189967
		341.75	0.019064
		341.8	0.0191309
		341.85	0.0191975
		341.9	0.0192638
		341.95	0.0193298
		342	0.0193954
		342.05	0.0194606
		342.1	0.0195256
		342.15	0.0195902
		342.2	0.0196544
		342.25	0.0197183
		342.3	0.0197819
		342.35	0.0198451
		342.4	0.0199079
		342.45	0.0199704
		342.5	0.0200325
		342.55	0.0200943
		342.6	0.0201558
		342.65	0.0202168
		342.7	0.0202775
		342.75	0.0203379
		342.8	0.0203979
		342.85	0.0204575
		342.9	0.0205168
		342.95	0.0205757
		343	0.0206342
		343.05	0.0206924
		343.1	0.0207503
		343.15	0.0208077
		343.2	0.0208648
		343.25	0.0209215
		343.3	0.0209779
		343.35	0.0210339
		343.4	0.0210896
		343.45	0.0211449
		343.5	0.0211998
		343.55	0.0212544
		343.6	0.0213086
		343.65	0.0213624
		343.7	0.0214159
		343.75	0.0214691
		343.8	0.0215219
		343.85	0.0215743
		343.9	0.0216264
		343.95	0.0216782
		344	0.0217296
		344.05	0.0217806
		344.1	0.0218314
		344.15	0.0218817
		344.2	0.0219318
		344.25	0.0219815
		344.3	0.0220308
		344.35	0.0220798
		344.4	0.0221285
		344.45	0.0221769
		344.5	0.022225
		344.55	0.0222727
		344.6	0.0223201
		344.65	0.0223672
		344.7	0.022414
		344.75	0.0224604
		344.8	0.0225066
		344.85	0.0225524
		344.9	0.022598
		344.95	0.0226432
		345	0.0226882
		345.05	0.0227328
		345.1	0.0227772
		345.15	0.0228213
		345.2	0.0228651
		345.25	0.0229086
		345.3	0.0229518
		345.35	0.0229948
		345.4	0.0230375
		345.45	0.0230799
		345.5	0.0231221
		345.55	0.023164
		345.6	0.0232057
		345.65	0.0232471
		345.7	0.0232883
		345.75	0.0233292
		345.8	0.0233698
		345.85	0.0234103
		345.9	0.0234505
		345.95	0.0234905
		346	0.0235302
		346.05	0.0235697
		346.1	0.023609
		346.15	0.0236481
		346.2	0.023687
		346.25	0.0237257
		346.3	0.0237641
		346.35	0.0238024
		346.4	0.0238405
		346.45	0.0238783
		346.5	0.023916
		346.55	0.0239535
		346.6	0.0239908
		346.65	0.0240279
		346.7	0.0240649
		346.75	0.0241017
		346.8	0.0241383
		346.85	0.0241747
		346.9	0.024211
		346.95	0.0242472
		347	0.0242831
		347.05	0.0243189
		347.1	0.0243546
		347.15	0.0243901
		347.2	0.0244255
		347.25	0.0244607
		347.3	0.0244958
		347.35	0.0245308
		347.4	0.0245656
		347.45	0.0246003
		347.5	0.0246348
		347.55	0.0246693
		347.6	0.0247036
		347.65	0.0247378
		347.7	0.0247719
		347.75	0.0248058
		347.8	0.0248397
		347.85	0.0248734
		347.9	0.024907
		347.95	0.0249406
		348	0.024974
		348.05	0.0250073
		348.1	0.0250405
		348.15	0.0250736
		348.2	0.0251066
		348.25	0.0251395
		348.3	0.0251723
		348.35	0.0252051
		348.4	0.0252377
		348.45	0.0252702
		348.5	0.0253027
		348.55	0.025335
		348.6	0.0253673
		348.65	0.0253995
		348.7	0.0254316
		348.75	0.0254636
		348.8	0.0254955
		348.85	0.0255273
		348.9	0.025559
		348.95	0.0255907
		349	0.0256223
		349.05	0.0256537
		349.1	0.0256851
		349.15	0.0257164
		349.2	0.0257477
		349.25	0.0257788
		349.3	0.0258099
		349.35	0.0258408
		349.4	0.0258717
		349.45	0.0259025
		349.5	0.0259332
		349.55	0.0259638
		349.6	0.0259943
		349.65	0.0260247
		349.7	0.026055
		349.75	0.0260853
		349.8	0.0261154
		349.85	0.0261455
		349.9	0.0261754
		349.95	0.0262052
		350	0.026235
		350.05	0.0262646
		350.1	0.0262942
		350.15	0.0263236
		350.2	0.0263529
		350.25	0.0263821
		350.3	0.0264112
		350.35	0.0264402
		350.4	0.026469
		350.45	0.0264978
		350.5	0.0265264
		350.55	0.0265549
		350.6	0.0265832
		350.65	0.0266115
		350.7	0.0266396
		350.75	0.0266675
		350.8	0.0266954
		350.85	0.026723
		350.9	0.0267506
		350.95	0.026778
		351	0.0268052
		351.05	0.0268324
		351.1	0.0268593
		351.15	0.0268861
		351.2	0.0269127
		351.25	0.0269392
		351.3	0.0269655
		351.35	0.0269916
		351.4	0.0270176
		351.45	0.0270434
		351.5	0.027069
		351.55	0.0270944
		351.6	0.0271196
		351.65	0.0271447
		351.7	0.0271695
		351.75	0.0271942
		351.8	0.0272186
		351.85	0.0272429
		351.9	0.0272669
		351.95	0.0272908
		352	0.0273144
		352.05	0.0273378
		352.1	0.027361
		352.15	0.027384
		352.2	0.0274068
		352.25	0.0274293
		352.3	0.0274516
		352.35	0.0274736
		352.4	0.0274954
		352.45	0.027517
		352.5	0.0275383
		352.55	0.0275594
		352.6	0.0275802
		352.65	0.0276008
		352.7	0.0276211
		352.75	0.0276411
		352.8	0.0276609
		352.85	0.0276804
		352.9	0.0276997
		352.95	0.0277186
		353	0.0277373
		353.05	0.0277558
		353.1	0.0277739
		353.15	0.0277917
		353.2	0.0278093
		353.25	0.0278265
		353.3	0.0278435
		353.35	0.0278602
		353.4	0.0278766
		353.45	0.0278926
		353.5	0.0279084
		353.55	0.0279239
		353.6	0.027939
		353.65	0.0279538
		353.7	0.0279684
		353.75	0.0279826
		353.8	0.0279965
		353.85	0.02801
		353.9	0.0280233
		353.95	0.0280362
		354	0.0280488
		354.05	0.028061
		354.1	0.028073
		354.15	0.0280846
		354.2	0.0280958
		354.25	0.0281068
		354.3	0.0281174
		354.35	0.0281276
		354.4	0.0281375
		354.45	0.0281471
		354.5	0.0281563
		354.55	0.0281652
		354.6	0.0281737
		354.65	0.0281819
		354.7	0.0281898
		354.75	0.0281973
		354.8	0.0282044
		354.85	0.0282112
		354.9	0.0282177
		354.95	0.0282238
		355	0.0282295
		355.05	0.0282349
		355.1	0.02824
		355.15	0.0282447
		355.2	0.028249
		355.25	0.028253
		355.3	0.0282566
		355.35	0.0282599
		355.4	0.0282629
		355.45	0.0282654
		355.5	0.0282677
		355.55	0.0282695
		355.6	0.028271
		355.65	0.0282722
		355.7	0.028273
		355.75	0.0282735
		355.8	0.0282736
		355.85	0.0282734
		355.9	0.0282728
		355.95	0.0282719
		356	0.0282706
		356.05	0.028269
		356.1	0.028267
		356.15	0.0282647
		356.2	0.0282621
		356.25	0.0282591
		356.3	0.0282558
		356.35	0.0282521
		356.4	0.0282481
		356.45	0.0282437
		356.5	0.028239
		356.55	0.028234
		356.6	0.0282287
		356.65	0.028223
		356.7	0.028217
		356.75	0.0282107
		356.8	0.028204
		356.85	0.0281971
		356.9	0.0281898
		356.95	0.0281821
		357	0.0281742
		357.05	0.0281659
		357.1	0.0281574
		357.15	0.0281485
		357.2	0.0281393
		357.25	0.0281298
		357.3	0.02812
		357.35	0.0281099
		357.4	0.0280995
		357.45	0.0280888
		357.5	0.0280778
		357.55	0.0280665
		357.6	0.0280549
		357.65	0.028043
		357.7	0.0280308
		357.75	0.0280183
		357.8	0.0280056
		357.85	0.0279925
		357.9	0.0279792
		357.95	0.0279656
		358	0.0279518
		358.05	0.0279376
		358.1	0.0279232
		358.15	0.0279085
		358.2	0.0278936
		358.25	0.0278784
		358.3	0.0278629
		358.35	0.0278472
		358.4	0.0278312
		358.45	0.0278149
		358.5	0.0277984
		358.55	0.0277817
		358.6	0.0277647
		358.65	0.0277474
		358.7	0.0277299
		358.75	0.0277122
		358.8	0.0276942
		358.85	0.027676
		358.9	0.0276575
		358.95	0.0276388
		359	0.0276199
		359.05	0.0276007
		359.1	0.0275813
		359.15	0.0275617
		359.2	0.0275418
		359.25	0.0275218
		359.3	0.0275015
		359.35	0.027481
		359.4	0.0274602
		359.45	0.0274393
		359.5	0.0274181
		359.55	0.0273967
		359.6	0.0273751
		359.65	0.0273533
		359.7	0.0273313
		359.75	0.0273091
		359.8	0.0272866
		359.85	0.027264
		359.9	0.0272411
		359.95	0.0272181
		360	0.0271948
		360.05	0.0271713
		360.1	0.0271477
		360.15	0.0271238
		360.2	0.0270997
		360.25	0.0270755
		360.3	0.027051
		360.35	0.0270264
		360.4	0.0270015
		360.45	0.0269764
		360.5	0.0269512
		360.55	0.0269258
		360.6	0.0269001
		360.65	0.0268743
		360.7	0.0268483
		360.75	0.026822
		360.8	0.0267956
		360.85	0.026769
		360.9	0.0267422
		360.95	0.0267152
		361	0.026688
		361.05	0.0266607
		361.1	0.0266331
		361.15	0.0266053
		361.2	0.0265774
		361.25	0.0265492
		361.3	0.0265209
		361.35	0.0264923
		361.4	0.0264636
		361.45	0.0264347
		361.5	0.0264056
		361.55	0.0263762
		361.6	0.0263467
		361.65	0.026317
		361.7	0.0262871
		361.75	0.026257
		361.8	0.0262267
		361.85	0.0261962
		361.9	0.0261655
		361.95	0.0261345
		362	0.0261034
		362.05	0.0260721
		362.1	0.0260406
		362.15	0.0260089
		362.2	0.0259769
		362.25	0.0259448
		362.3	0.0259125
		362.35	0.0258799
		362.4	0.0258471
		362.45	0.0258141
		362.5	0.0257809
		362.55	0.0257475
		362.6	0.0257139
		362.65	0.0256801
		362.7	0.025646
		362.75	0.0256117
		362.8	0.0255772
		362.85	0.0255425
		362.9	0.0255075
		362.95	0.0254723
		363	0.0254369
		363.05	0.0254013
		363.1	0.0253655
		363.15	0.0253294
		363.2	0.025293
		363.25	0.0252565
		363.3	0.0252197
		363.35	0.0251827
		363.4	0.0251454
		363.45	0.0251079
		363.5	0.0250701
		363.55	0.0250321
		363.6	0.0249939
		363.65	0.0249554
		363.7	0.0249167
		363.75	0.0248777
		363.8	0.0248385
		363.85	0.024799
		363.9	0.0247593
		363.95	0.0247193
		364	0.024679
		364.05	0.0246385
		364.1	0.0245978
		364.15	0.0245568
		364.2	0.0245155
		364.25	0.024474
		364.3	0.0244322
		364.35	0.0243901
		364.4	0.0243477
		364.45	0.0243051
		364.5	0.0242623
		364.55	0.0242191
		364.6	0.0241757
		364.65	0.0241321
		364.7	0.0240881
		364.75	0.0240439
		364.8	0.0239994
		364.85	0.0239546
		364.9	0.0239096
		364.95	0.0238643
		365	0.0238187
		365.05	0.0237728
		365.1	0.0237266
		365.15	0.0236802
		365.2	0.0236335
		365.25	0.0235865
		365.3	0.0235392
		365.35	0.0234917
		365.4	0.0234438
		365.45	0.0233957
		365.5	0.0233473
		365.55	0.0232986
		365.6	0.0232497
		365.65	0.0232004
		365.7	0.0231509
		365.75	0.0231011
		365.8	0.023051
		365.85	0.0230007
		365.9	0.02295
		365.95	0.0228991
		366	0.0228479
		366.05	0.0227964
		366.1	0.0227447
		366.15	0.0226926
		366.2	0.0226403
		366.25	0.0225877
		366.3	0.0225348
		366.35	0.0224817
		366.4	0.0224283
		366.45	0.0223746
		366.5	0.0223206
		366.55	0.0222664
		366.6	0.0222119
		366.65	0.0221571
		366.7	0.022102
		366.75	0.0220467
		366.8	0.0219911
		366.85	0.0219353
		366.9	0.0218792
		366.95	0.0218228
		367	0.0217662
		367.05	0.0217093
		367.1	0.0216522
		367.15	0.0215948
		367.2	0.0215372
		367.25	0.0214793
		367.3	0.0214211
		367.35	0.0213628
		367.4	0.0213041
		367.45	0.0212453
		367.5	0.0211861
		367.55	0.0211268
		367.6	0.0210672
		367.65	0.0210074
		367.7	0.0209474
		367.75	0.0208871
		367.8	0.0208266
		367.85	0.0207659
		367.9	0.020705
		367.95	0.0206438
		368	0.0205825
		368.05	0.0205209
		368.1	0.0204591
		368.15	0.0203971
		368.2	0.020335
		368.25	0.0202726
		368.3	0.02021
		368.35	0.0201472
		368.4	0.0200843
		368.45	0.0200211
		368.5	0.0199578
		368.55	0.0198943
		368.6	0.0198306
		368.65	0.0197667
		368.7	0.0197027
		368.75	0.0196385
		368.8	0.0195742
		368.85	0.0195097
		368.9	0.019445
		368.95	0.0193802
		369	0.0193152
		369.05	0.0192501
		369.1	0.0191849
		369.15	0.0191195
		369.2	0.0190539
		369.25	0.0189883
		369.3	0.0189225
		369.35	0.0188566
		369.4	0.0187906
		369.45	0.0187245
		369.5	0.0186582
		369.55	0.0185919
		369.6	0.0185254
		369.65	0.0184589
		369.7	0.0183922
		369.75	0.0183255
		369.8	0.0182586
		369.85	0.0181917
		369.9	0.0181247
		369.95	0.0180577
		370	0.0179905
		370.05	0.0179233
		370.1	0.0178561
		370.15	0.0177888
		370.2	0.0177214
		370.25	0.0176539
		370.3	0.0175864
		370.35	0.0175189
		370.4	0.0174513
		370.45	0.0173837
		370.5	0.0173161
		370.55	0.0172484
		370.6	0.0171807
		370.65	0.017113
		370.7	0.0170453
		370.75	0.0169775
		370.8	0.0169097
		370.85	0.016842
		370.9	0.0167742
		370.95	0.0167064
		371	0.0166387
		371.05	0.0165709
		371.1	0.0165032
		371.15	0.0164354
		371.2	0.0163677
		371.25	0.0163
		371.3	0.0162324
		371.35	0.0161647
		371.4	0.0160971
		371.45	0.0160296
		371.5	0.015962
		371.55	0.0158945
		371.6	0.0158271
		371.65	0.0157597
		371.7	0.0156924
		371.75	0.0156251
		371.8	0.0155579
		371.85	0.0154907
		371.9	0.0154237
		371.95	0.0153566
		372	0.0152897
		372.05	0.0152228
		372.1	0.015156
		372.15	0.0150893
		372.2	0.0150227
		372.25	0.0149561
		372.3	0.0148897
		372.35	0.0148233
		372.4	0.014757
		372.45	0.0146908
		372.5	0.0146248
		372.55	0.0145588
		372.6	0.0144929
		372.65	0.0144272
		372.7	0.0143615
		372.75	0.014296
		372.8	0.0142306
		372.85	0.0141653
		372.9	0.0141001
		372.95	0.014035
		373	0.0139701
		373.05	0.0139053
		373.1	0.0138406
		373.15	0.013776
		373.2	0.0137116
		373.25	0.0136473
		373.3	0.0135831
		373.35	0.0135191
		373.4	0.0134552
		373.45	0.0133915
		373.5	0.0133279
		373.55	0.0132644
		373.6	0.0132011
		373.65	0.013138
		373.7	0.0130749
		373.75	0.0130121
		373.8	0.0129494
		373.85	0.0128868
		373.9	0.0128244
		373.95	0.0127622
		374	0.0127001
		374.05	0.0126382
		374.1	0.0125764
		374.15	0.0125148
		374.2	0.0124533
		374.25	0.012392
		374.3	0.0123309
		374.35	0.01227
		374.4	0.0122092
		374.45	0.0121486
		374.5	0.0120881
		374.55	0.0120278
		374.6	0.0119677
		374.65	0.0119078
		374.7	0.011848
		374.75	0.0117884
		374.8	0.0117289
		374.85	0.0116697
		374.9	0.0116106
		374.95	0.0115517
		375	0.011493
		375.05	0.0114344
		375.1	0.011376
		375.15	0.0113178
		375.2	0.0112598
		375.25	0.0112019
		375.3	0.0111442
		375.35	0.0110867
		375.4	0.0110294
		375.45	0.0109723
		375.5	0.0109153
		375.55	0.0108585
		375.6	0.0108019
		375.65	0.0107455
		375.7	0.0106892
		375.75	0.0106331
		375.8	0.0105772
		375.85	0.0105215
		375.9	0.010466
		375.95	0.0104106
		376	0.0103554
		376.05	0.0103004
		376.1	0.0102456
		376.15	0.0101909
		376.2	0.0101365
		376.25	0.0100822
		376.3	0.0100281
		376.35	0.00997417
		376.4	0.00992043
		376.45	0.00986687
		376.5	0.00981348
		376.55	0.00976027
		376.6	0.00970724
		376.65	0.00965439
		376.7	0.00960172
		376.75	0.00954922
		376.8	0.0094969
		376.85	0.00944476
		376.9	0.0093928
		376.95	0.00934101
		377	0.0092894
		377.05	0.00923797
		377.1	0.00918671
		377.15	0.00913563
		377.2	0.00908472
		377.25	0.00903399
		377.3	0.00898344
		377.35	0.00893306
		377.4	0.00888285
		377.45	0.00883282
		377.5	0.00878297
		377.55	0.00873329
		377.6	0.00868378
		377.65	0.00863444
		377.7	0.00858528
		377.75	0.00853627
		377.8	0.00848743
		377.85	0.00843879
		377.9	0.00839032
		377.95	0.00834202
		378	0.00829389
		378.05	0.00824594
		378.1	0.00819815
		378.15	0.00815054
		378.2	0.0081031
		378.25	0.00805583
		378.3	0.00800873
		378.35	0.0079618
		378.4	0.00791503
		378.45	0.00786844
		378.5	0.00782202
		378.55	0.00777576
		378.6	0.00772968
		378.65	0.00768376
		378.7	0.00763802
		378.75	0.00759244
		378.8	0.00754703
		378.85	0.00750178
		378.9	0.00745668
		378.95	0.00741178
		379	0.00736704
		379.05	0.00732247
		379.1	0.00727806
		379.15	0.00723383
		379.2	0.00718973
		379.25	0.00714583
		379.3	0.00710209
		379.35	0.00705852
		379.4	0.00701512
		379.45	0.00697188
		379.5	0.00692881
		379.55	0.00688591
		379.6	0.00684317
		379.65	0.0068006
		379.7	0.0067582
		379.75	0.00671596
		379.8	0.00667388
		379.85	0.00663197
		379.9	0.00659023
		379.95	0.00654866
		380	0.00650725
		380.05	0.006466
		380.1	0.00642492
		380.15	0.00638401
		380.2	0.00634326
		380.25	0.00630268
		380.3	0.00626226
		380.35	0.00622201
		380.4	0.00618193
		380.45	0.00614201
		380.5	0.00610226
		380.55	0.00606267
		380.6	0.00602325
		380.65	0.00598399
		380.7	0.00594488
		380.75	0.00590595
		380.8	0.0058672
		380.85	0.00582861
		380.9	0.00579018
		380.95	0.00575192
		381	0.00571383
		381.05	0.0056759
		381.1	0.00563814
		381.15	0.00560052
		381.2	0.00556309
		381.25	0.00552583
		381.3	0.00548874
		381.35	0.00545181
		381.4	0.00541505
		381.45	0.00537845
		381.5	0.00534202
		381.55	0.00530576
		381.6	0.00526967
		381.65	0.00523374
		381.7	0.00519798
		381.75	0.00516238
		381.8	0.00512695
		381.85	0.00509169
		381.9	0.0050566
		381.95	0.00502167
		382	0.00498691
		382.05	0.00495232
		382.1	0.00491789
		382.15	0.00488363
		382.2	0.00484954
		382.25	0.00481561
		382.3	0.00478185
		382.35	0.00474826
		382.4	0.00471484
		382.45	0.00468158
		382.5	0.00464849
		382.55	0.00461557
		382.6	0.00458282
		382.65	0.00455023
		382.7	0.00451781
		382.75	0.00448556
		382.8	0.00445344
		382.85	0.00442152
		382.9	0.00438977
		382.95	0.00435819
		383	0.00432674
		383.05	0.00429549
		383.1	0.00426441
		383.15	0.00423349
		383.2	0.00420274
		383.25	0.00417215
		383.3	0.00414173
		383.35	0.00411148
		383.4	0.00408139
		383.45	0.00405147
		383.5	0.00402171
		383.55	0.00399212
		383.6	0.0039627
		383.65	0.00393344
		383.7	0.00390434
		383.75	0.00387541
		383.8	0.00384665
		383.85	0.00381805
		383.9	0.00378961
		383.95	0.00376133
		384	0.00373323
		384.05	0.00370528
		384.1	0.0036775
		384.15	0.00364988
		384.2	0.00362242
		384.25	0.00359512
		384.3	0.00356799
		384.35	0.00354102
		384.4	0.00351421
		384.45	0.00348756
		384.5	0.00346108
		384.55	0.00343475
		384.6	0.00340858
		384.65	0.00338258
		384.7	0.00335673
		384.75	0.00333104
		384.8	0.00330551
		384.85	0.00328014
		384.9	0.00325493
		384.95	0.00322988
		385	0.00320495
		385.05	0.00318021
		385.1	0.00315563
		385.15	0.0031312
		385.2	0.00310693
		385.25	0.00308281
		385.3	0.00305885
		385.35	0.00303504
		385.4	0.00301139
		385.45	0.00298788
		385.5	0.00296453
		385.55	0.00294134
		385.6	0.00291827
		385.65	0.00289537
		385.7	0.0028726
		385.75	0.00285001
		385.8	0.00282754
		385.85	0.00280525
		385.9	0.0027831
		385.95	0.00276111
		386	0.00273925
		386.05	0.00271755
		386.1	0.00269599
		386.15	0.00267458
		386.2	0.00265331
		386.25	0.00263219
		386.3	0.00261121
		386.35	0.00259037
		386.4	0.00256967
		386.45	0.00254912
		386.5	0.00252871
		386.55	0.00250843
		386.6	0.0024883
		386.65	0.00246831
		386.7	0.00244845
		386.75	0.00242874
		386.8	0.00240916
		386.85	0.00238971
		386.9	0.00237041
		386.95	0.00235123
		387	0.00233219
		387.05	0.00231329
		387.1	0.00229452
		387.15	0.00227588
		387.2	0.00225737
		387.25	0.002239
		387.3	0.00222075
		387.35	0.00220263
		387.4	0.00218465
		387.45	0.00216679
		387.5	0.00214906
		387.55	0.00213145
		387.6	0.00211395
		387.65	0.00209659
		387.7	0.00207937
		387.75	0.00206226
		387.8	0.00204528
		387.85	0.00202842
		387.9	0.00201168
		387.95	0.00199507
		388	0.00197857
		388.05	0.00196219
		388.1	0.00194593
		388.15	0.00192979
		388.2	0.00191377
		388.25	0.00189787
		388.3	0.00188208
		388.35	0.0018664
		388.4	0.00185084
		388.45	0.00183539
		388.5	0.00182006
		388.55	0.00180484
		388.6	0.00178972
		388.65	0.00177472
		388.7	0.00175983
		388.75	0.00174505
		388.8	0.00173038
		388.85	0.00171582
		388.9	0.00170136
		388.95	0.00168701
		389	0.00167276
		389.05	0.00165862
		389.1	0.00164459
		389.15	0.00163066
		389.2	0.00161683
		389.25	0.0016031
		389.3	0.00158947
		389.35	0.00157595
		389.4	0.00156252
		389.45	0.0015492
		389.5	0.00153597
		389.55	0.00152284
		389.6	0.00150981
		389.65	0.00149687
		389.7	0.00148403
		389.75	0.00147129
		389.8	0.00145864
		389.85	0.00144608
		389.9	0.00143362
		389.95	0.00142125
		390	0.00140897
		390.05	0.00139679
		390.1	0.00138469
		390.15	0.00137268
		390.2	0.00136077
		390.25	0.00134894
		390.3	0.0013372
		390.35	0.00132555
		390.4	0.00131398
		390.45	0.0013025
		390.5	0.00129111
		390.55	0.0012798
		390.6	0.00126857
		390.65	0.00125743
		390.7	0.00124637
		390.75	0.00123539
		390.8	0.0012245
		390.85	0.00121369
		390.9	0.00120296
		390.95	0.0011923
		391	0.00118173
		391.05	0.00117124
		391.1	0.00116082
		391.15	0.00115049
		391.2	0.00114022
		391.25	0.00113004
		391.3	0.00111993
		391.35	0.0011099
		391.4	0.00109995
		391.45	0.00109006
		391.5	0.00108026
		391.55	0.00107052
		391.6	0.00106086
		391.65	0.00105127
		391.7	0.00104175
		391.75	0.00103231
		391.8	0.00102293
		391.85	0.00101363
		391.9	0.0010044
		391.95	0.00099523
		392	0.000986134
		392.05	0.000977107
		392.1	0.000968147
		392.15	0.000959255
		392.2	0.000950429
		392.25	0.000941671
		392.3	0.000932954
		392.35	0.000924327
		392.4	0.000915766
		392.45	0.00090727
		392.5	0.000898813
		392.55	0.000890446
		392.6	0.000882142
		392.65	0.000873901
		392.7	0.000865697
		392.75	0.000857582
		392.8	0.000849503
		392.85	0.000841512
		392.9	0.000833581
		392.95	0.00082571
		393	0.0008179
		393.05	0.000810149
		393.1	0.000802457
		393.15	0.000794823
		393.2	0.000787249
		393.25	0.000779708
		393.3	0.000772249
		393.35	0.000764848
		393.4	0.000757503
		393.45	0.000750216
		393.5	0.000742984
		393.55	0.000735808
		393.6	0.000728687
		393.65	0.000721621
		393.7	0.00071461
		393.75	0.000707654
		393.8	0.000700751
		393.85	0.000693902
		393.9	0.000687106
		393.95	0.000680364
		394	0.000673673
		394.05	0.000667011
		394.1	0.000660426
		394.15	0.000653893
		394.2	0.000647411
		394.25	0.000640979
		394.3	0.000634599
		394.35	0.000628269
		394.4	0.000621988
		394.45	0.000615758
		394.5	0.000609577
		394.55	0.000603445
		394.6	0.000597362
		394.65	0.000591327
		394.7	0.000585341
		394.75	0.000579402
		394.8	0.000573511
		394.85	0.000567668
		394.9	0.000561871
		394.95	0.000556122
		395	0.000550418
		395.05	0.000544761
		395.1	0.00053915
		395.15	0.000533585
		395.2	0.000528064
		395.25	0.000522589
		395.3	0.000517159
		395.35	0.000511773
		395.4	0.000506432
		395.45	0.000501134
		395.5	0.000495881
		395.55	0.00049067
		395.6	0.000485503
		395.65	0.000480379
		395.7	0.000475298
		395.75	0.000470259
		395.8	0.000465262
		395.85	0.000460308
		395.9	0.000455394
		395.95	0.000450523
		396	0.000445692
		396.05	0.000440903
		396.1	0.000436154
		396.15	0.000431445
		396.2	0.000426777
		396.25	0.000422149
		396.3	0.00041756
		396.35	0.000413011
		396.4	0.000408502
		396.45	0.000404006
		396.5	0.000399575
		396.55	0.000395183
		396.6	0.000390828
		396.65	0.000386512
		396.7	0.000382233
		396.75	0.000377992
		396.8	0.000373788
		396.85	0.000369622
		396.9	0.000365492
		396.95	0.000361399
		397	0.000357343
		397.05	0.000353322
		397.1	0.000349338
		397.15	0.00034539
		397.2	0.000341477
		397.25	0.000337599
		397.3	0.000333756
		397.35	0.000329949
		397.4	0.000326176
		397.45	0.000322437
		397.5	0.000318733
		397.55	0.000315063
		397.6	0.000311426
		397.65	0.000307823
		397.7	0.000304254
		397.75	0.000300718
		397.8	0.000297214
		397.85	0.000293744
		397.9	0.000290306
		397.95	0.0002869
		398	0.000283526
		398.05	0.000280185
		398.1	0.000276874
		398.15	0.000273596
		398.2	0.000270349
		398.25	0.000267132
		398.3	0.000263947
		398.35	0.000260792
		398.4	0.000257668
		398.45	0.000254574
		398.5	0.00025151
		398.55	0.000248476
		398.6	0.000245472
		398.65	0.000242497
		398.7	0.000239551
		398.75	0.000236635
		398.8	0.000233747
		398.85	0.000230888
		398.9	0.000228057
		398.95	0.000225254
		399	0.00022248
		399.05	0.000219733
		399.1	0.000217014
		399.15	0.000214323
		399.2	0.000211659
		399.25	0.000209021
		399.3	0.000206411
		399.35	0.000203828
		399.4	0.00020127
		399.45	0.00019874
		399.5	0.000196235
		399.55	0.000193756
		399.6	0.000191303
		399.65	0.000188875
		399.7	0.000186473
		399.75	0.000184096
		399.8	0.000181744
		399.85	0.000179417
		399.9	0.000177114
		399.95	0.000174836
		400	0.000172582
		400.05	0.000170352
		400.1	0.000168145
		400.15	0.000165963
		400.2	0.000163804
		400.25	0.000161668
		400.3	0.000159555
		400.35	0.000157466
		400.4	0.000155399
		400.45	0.000153354
		400.5	0.000151332
		400.55	0.000149332
		400.6	0.000147354
		400.65	0.000145398
		400.7	0.000143464
		400.75	0.000141527
		400.8	0.000139636
		400.85	0.000137767
		400.9	0.000135918
		400.95	0.00013409
		401	0.000132283
		401.05	0.000130496
		401.1	0.000128704
		401.15	0.000126959
		401.2	0.000125208
		401.25	0.000123478
		401.3	0.000121793
		401.35	0.000120127
		401.4	0.000118481
		401.45	0.000116853
		401.5	0.000115245
		401.55	0.000113655
		401.6	0.000112083
		401.65	0.00011053
		401.7	0.000108995
		401.75	0.000107478
		401.8	0.000105979
		401.85	0.000104498
		401.9	0.000103034
		401.95	0.000101588
		402	0.000100159
		402.05	9.87472e-05
		402.1	9.73522e-05
		402.15	9.59739e-05
		402.2	9.46123e-05
		402.25	9.32672e-05
		402.3	9.19383e-05
		402.35	9.06257e-05
		402.4	8.9329e-05
		402.45	8.80482e-05
		402.5	8.67832e-05
		402.55	8.55336e-05
		402.6	8.42995e-05
		402.65	8.30807e-05
		402.7	8.1877e-05
		402.75	8.06882e-05
		402.8	7.95143e-05
		402.85	7.83551e-05
		402.9	7.72104e-05
		402.95	7.60801e-05
		403	7.4964e-05
		403.05	7.38621e-05
		403.1	7.27742e-05
		403.15	7.17e-05
		403.2	7.06396e-05
		403.25	6.95927e-05
		403.3	6.85344e-05
		403.35	6.75153e-05
		403.4	6.65092e-05
		403.45	6.55161e-05
		403.5	6.45359e-05
		403.55	6.35683e-05
		403.6	6.26134e-05
		403.65	6.16709e-05
		403.7	6.07407e-05
		403.75	5.98227e-05
		403.8	5.89167e-05
		403.85	5.80227e-05
		403.9	5.71405e-05
		403.95	5.627e-05
		404	5.54111e-05
		404.05	5.45636e-05
		404.1	5.37274e-05
		404.15	5.29023e-05
		404.2	5.20884e-05
		404.25	5.12854e-05
		404.3	5.04933e-05
		404.35	4.97118e-05
		404.4	4.8941e-05
		404.45	4.81806e-05
		404.5	4.74306e-05
		404.55	4.66908e-05
		404.6	4.59612e-05
		404.65	4.52416e-05
		404.7	4.45319e-05
		404.75	4.3832e-05
		404.8	4.31417e-05
		404.85	4.24611e-05
		404.9	4.17899e-05
		404.95	4.11281e-05
		405	4.04755e-05
		405.05	3.9832e-05
		405.1	3.91976e-05
		405.15	3.85722e-05
		405.2	3.79555e-05
		405.25	3.73476e-05
		405.3	3.67483e-05
		405.35	3.61575e-05
		405.4	3.55508e-05
		405.45	3.49775e-05
		405.5	3.44124e-05
		405.55	3.38554e-05
		405.6	3.33064e-05
		405.65	3.27652e-05
		405.7	3.22319e-05
		405.75	3.17064e-05
		405.8	3.11884e-05
		405.85	3.0678e-05
		405.9	3.0175e-05
		405.95	2.96794e-05
		406	2.9191e-05
		406.05	2.87098e-05
		406.1	2.82357e-05
		406.15	2.77685e-05
		406.2	2.73083e-05
		406.25	2.68549e-05
		406.3	2.64082e-05
		406.35	2.59682e-05
		406.4	2.55347e-05
		406.45	2.51077e-05
		406.5	2.46871e-05
		406.55	2.42729e-05
		406.6	2.38402e-05
		406.65	2.3439e-05
		406.7	2.30438e-05
		406.75	2.26546e-05
		406.8	2.22714e-05
		406.85	2.18939e-05
		406.9	2.15222e-05
		406.95	2.11562e-05
		407	2.07958e-05
		407.05	2.04409e-05
		407.1	2.00915e-05
		407.15	1.97475e-05
		407.2	1.94088e-05
		407.25	1.90753e-05
		407.3	1.8747e-05
		407.35	1.84238e-05
		407.4	1.81056e-05
		407.45	1.77924e-05
		407.5	1.74841e-05
		407.55	1.71806e-05
		407.6	1.6882e-05
		407.65	1.6588e-05
		407.7	1.62986e-05
		407.75	1.60138e-05
		407.8	1.57336e-05
		407.85	1.54577e-05
		407.9	1.51863e-05
		407.95	1.49192e-05
		408	1.46564e-05
		408.05	1.43978e-05
		408.1	1.41433e-05
		408.15	1.38929e-05
		408.2	1.36466e-05
		408.25	1.34042e-05
		408.3	1.31657e-05
		408.35	1.29311e-05
		408.4	1.27004e-05
		408.45	1.24734e-05
		408.5	1.225e-05
		408.55	1.20304e-05
		408.6	1.18143e-05
		408.65	1.16018e-05
		408.7	1.13928e-05
		408.75	1.11872e-05
		408.8	1.0985e-05
		408.85	1.07861e-05
		408.9	1.05906e-05
		408.95	1.03983e-05
		409	1.02092e-05
		409.05	1.00232e-05
		409.1	9.84035e-06
		409.15	9.66056e-06
		409.2	9.48379e-06
		409.25	9.30998e-06
		409.3	9.1391e-06
		409.35	8.9711e-06
		409.4	8.80594e-06
		409.45	8.64357e-06
		409.5	8.48396e-06
		409.55	8.32705e-06
		409.6	8.17282e-06
		409.65	8.02122e-06
		409.7	7.87221e-06
		409.75	7.72575e-06
		409.8	7.58181e-06
		409.85	7.44033e-06
		409.9	7.30129e-06
		409.95	7.16465e-06
[truncated: 1 more rows]

## Sheet: PlotDat9
Source sheet	data	300	0
Plot name	ProbDens9	300.2	0
Plot Type	16	300.4	0
1st free col	5	300.6	0
Sigma Level	2	300.8	0
Absolute Errs	TRUE	301	0
Symbol Type	5	301.2	0
Inverse Plot	FALSE	301.4	0
Color Plot	FALSE	301.6	0
3D plot	FALSE	301.8	0
Linear	FALSE	302	0
Data Range	AD557:AE609	302.2	0
Filled Symbols	TRUE	302.4	0
ConcAge	FALSE	302.6	0
ConcSwap	FALSE	302.8	0
1st Symbol-row	1	303	0
		303.2	0
		303.4	0
		303.6	0
		303.8	0
		304	0
		304.2	0
		304.4	0
		304.6	0
		304.8	0
		305	0
		305.2	0
		305.4	0
		305.6	0
		305.8	0
		306	0
		306.2	0
		306.4	0
		306.6	0
		306.8	0
		307	0
		307.2	0
		307.4	0
		307.6	0
		307.8	0
		308	0
		308.2	0
		308.4	0
		308.6	0
		308.8	0
		309	0
		309.2	0
		309.4	0
		309.6	0
		309.8	0
		310	0
		310.2	0
		310.4	0
		310.6	0
		310.8	0
		311	0
		311.2	0
		311.4	0
		311.6	0
		311.8	0
		312	0
		312.2	0
		312.4	0
		312.6	0
		312.8	0
		313	0
		313.2	0
		313.4	0
		313.6	0
		313.8	0
		314	0
		314.2	0
		314.4	0
		314.6	0
		314.8	0
		315	0
		315.2	0
		315.4	0
		315.6	0
		315.8	0
		316	0
		316.2	0
		316.4	0
		316.6	0
		316.8	0
		317	0
		317.2	0
		317.4	0
		317.6	0
		317.8	0
		318	0
		318.2	0
		318.4	0
		318.6	0
		318.8	0
		319	0
		319.2	0
		319.4	0
		319.6	0
		319.8	0
		320	0
		320.2	0
		320.4	0
		320.6	0
		320.8	0
		321	0
		321.2	0
		321.4	0
		321.6	0
		321.8	0
		322	0
		322.2	0
		322.4	0
		322.6	0
		322.8	0
		323	0
		323.2	0
		323.4	0
		323.6	0
		323.8	0
		324	0
		324.2	0
		324.4	0
		324.6	0
		324.8	0
		325	0
		325.2	2.02715e-08
		325.4	2.2956e-08
		325.6	2.59773e-08
		325.8	2.9375e-08
		326	3.31933e-08
		326.2	5.68759e-08
		326.4	8.40307e-08
		326.6	9.50687e-08
		326.8	1.07484e-07
		327	1.21437e-07
		327.2	1.37109e-07
		327.4	1.54698e-07
		327.6	1.74423e-07
		327.8	2.16397e-07
		328	2.43819e-07
		328.2	2.74527e-07
		328.4	3.0889e-07
		328.6	3.47315e-07
		328.8	3.90249e-07
		329	4.38186e-07
		329.2	4.9167e-07
		329.4	5.51298e-07
		329.6	6.17726e-07
		329.8	6.91675e-07
		330	7.73935e-07
		330.2	8.6537e-07
		330.4	9.66928e-07
		330.6	1.07964e-06
		330.8	1.20465e-06
		331	1.34318e-06
		331.2	1.49658e-06
		331.4	1.66631e-06
		331.6	1.85398e-06
		331.8	2.06132e-06
		332	2.29021e-06
		332.2	2.56293e-06
		332.4	2.84465e-06
		332.6	3.15512e-06
		332.8	3.49705e-06
		333	3.87332e-06
		333.2	4.28707e-06
		333.4	4.74171e-06
		333.6	5.24088e-06
		333.8	5.78855e-06
		334	6.40889e-06
		334.2	7.06876e-06
		334.4	7.7911e-06
		334.6	8.58124e-06
		334.8	9.44488e-06
		335	1.03881e-05
		335.2	1.14176e-05
		335.4	1.25402e-05
		335.6	1.37636e-05
		335.8	1.50957e-05
		336	1.6545e-05
		336.2	1.81412e-05
		336.4	1.98559e-05
		336.6	2.17365e-05
		336.8	2.37585e-05
		337	2.59504e-05
		337.2	2.83247e-05
		337.4	3.08946e-05
		337.6	3.36741e-05
		337.8	3.66779e-05
		338	3.99217e-05
		338.2	4.34219e-05
		338.4	4.72155e-05
		338.6	5.12846e-05
		338.8	5.56655e-05
		339	6.03784e-05
		339.2	6.54447e-05
		339.4	7.09054e-05
		339.6	7.67484e-05
		339.8	8.30148e-05
		340	8.97304e-05
		340.2	9.69216e-05
		340.4	0.000104616
		340.6	0.000112843
		340.8	0.000121632
		341	0.000131015
		341.2	0.000141023
		341.4	0.000151689
		341.6	0.00016307
		341.8	0.000175161
		342	0.000188018
		342.2	0.000201679
		342.4	0.000216183
		342.6	0.000231587
		342.8	0.000247918
		343	0.000265199
		343.2	0.000283508
		343.4	0.00030285
		343.6	0.000323289
		343.8	0.000344869
		344	0.000367635
		344.2	0.000391633
		344.4	0.000416911
		344.6	0.000443514
		344.8	0.000471489
		345	0.000500883
		345.2	0.000531744
		345.4	0.000564119
		345.6	0.000598053
		345.8	0.000633593
		346	0.000670784
		346.2	0.000709673
		346.4	0.000750301
		346.6	0.000792713
		346.8	0.00083695
		347	0.000883053
		347.2	0.000931061
		347.4	0.000981011
		347.6	0.00103294
		347.8	0.00108688
		348	0.00114286
		348.2	0.00120092
		348.4	0.00126107
		348.6	0.00132335
		348.8	0.00138777
		349	0.00145437
		349.2	0.00152314
		349.4	0.0015941
		349.6	0.00166728
		349.8	0.00174266
		350	0.00182025
		350.2	0.00190005
		350.4	0.00198205
		350.6	0.00206627
		350.8	0.00215267
		351	0.00224125
		351.2	0.00233199
		351.4	0.00242488
		351.6	0.00251987
		351.8	0.00261696
		352	0.00271611
		352.2	0.00281729
		352.4	0.00292045
		352.6	0.00302557
		352.8	0.00313259
		353	0.00324148
		353.2	0.00335219
		353.4	0.00346466
		353.6	0.00357885
		353.8	0.0036947
		354	0.00381216
		354.2	0.00393117
		354.4	0.00405167
		354.6	0.00417359
		354.8	0.00429689
		355	0.00442149
		355.2	0.00454732
		355.4	0.00467433
		355.6	0.00480245
		355.8	0.00493162
		356	0.00506175
		356.2	0.00519277
		356.4	0.00532461
		356.6	0.00545721
		356.8	0.00559049
		357	0.00572437
		357.2	0.00585877
		357.4	0.00599361
		357.6	0.00612882
		357.8	0.00626431
		358	0.00639999
		358.2	0.00653577
		358.4	0.00667157
		358.6	0.00680729
		358.8	0.00694283
		359	0.0070781
		359.2	0.00721298
		359.4	0.00734738
		359.6	0.00748118
		359.8	0.00761426
		360	0.00774652
		360.2	0.00787783
		360.4	0.00800805
		360.6	0.00813708
		360.8	0.00826477
		361	0.00839099
		361.2	0.0085156
		361.4	0.00863846
		361.6	0.00875943
		361.8	0.00887837
		362	0.00899512
		362.2	0.00910956
		362.4	0.00922152
		362.6	0.00933087
		362.8	0.00943746
		363	0.00954115
		363.2	0.0096418
		363.4	0.00973929
		363.6	0.00983346
		363.8	0.00992421
		364	0.0100114
		364.2	0.010095
		364.4	0.0101747
		364.6	0.0102507
		364.8	0.0103226
		365	0.0103906
		365.2	0.0104544
		365.4	0.0105141
		365.6	0.0105696
		365.8	0.0106209
		366	0.0106679
		366.2	0.0107107
		366.4	0.0107492
		366.6	0.0107835
		366.8	0.0108135
		367	0.0108394
		367.2	0.0108612
		367.4	0.0108789
		367.6	0.0108927
		367.8	0.0109026
		368	0.0109087
		368.2	0.010911
		368.4	0.0109099
		368.6	0.0109053
		368.8	0.0108974
		369	0.0108863
		369.2	0.0108722
		369.4	0.0108552
		369.6	0.0108355
		369.8	0.0108132
		370	0.0107885
		370.2	0.0107615
		370.4	0.0107325
		370.6	0.0107014
		370.8	0.0106686
		371	0.0106342
		371.2	0.0105982
		371.4	0.0105609
		371.6	0.0105223
		371.8	0.0104826
		372	0.010442
		372.2	0.0104005
		372.4	0.0103582
		372.6	0.0103152
		372.8	0.0102716
		373	0.0102275
		373.2	0.010183
		373.4	0.010138
		373.6	0.0100928
		373.8	0.0100472
		374	0.0100014
		374.2	0.00995524
		374.4	0.00990888
		374.6	0.00986226
		374.8	0.00981542
		375	0.00976827
		375.2	0.00972084
		375.4	0.00967307
		375.6	0.00962493
		375.8	0.00957637
		376	0.00952736
		376.2	0.00947782
		376.4	0.0094277
		376.6	0.00937693
		376.8	0.00932546
		377	0.00927322
		377.2	0.0092201
		377.4	0.00916604
		377.6	0.00911098
		377.8	0.00905484
		378	0.00899753
		378.2	0.008939
		378.4	0.00887918
		378.6	0.00881797
		378.8	0.00875531
		379	0.00869115
		379.2	0.00862543
		379.4	0.00855807
		379.6	0.00848905
		379.8	0.0084183
		380	0.00834581
		380.2	0.0082715
		380.4	0.00819536
		380.6	0.00811739
		380.8	0.00803753
		381	0.00795579
		381.2	0.00787219
		381.4	0.0077867
		381.6	0.00769934
		381.8	0.00761013
		382	0.00751909
		382.2	0.00742626
		382.4	0.00733169
		382.6	0.00723541
		382.8	0.00713748
		383	0.00703796
		383.2	0.00693692
		383.4	0.00683444
		383.6	0.00673059
		383.8	0.00662546
		384	0.00651915
		384.2	0.00641176
		384.4	0.00630339
		384.6	0.00619414
		384.8	0.00608413
		385	0.00597349
		385.2	0.00586233
		385.4	0.00575079
		385.6	0.00563898
		385.8	0.00552704
		386	0.00541511
		386.2	0.00530333
		386.4	0.00519187
		386.6	0.0050808
		386.8	0.00497029
		387	0.0048605
		387.2	0.00475155
		387.4	0.0046436
		387.6	0.00453678
		387.8	0.00443125
		388	0.00432713
		388.2	0.00422455
		388.4	0.00412366
		388.6	0.00402459
		388.8	0.00392748
		389	0.00383245
		389.2	0.00373962
		389.4	0.00364911
		389.6	0.00356105
		389.8	0.00347556
		390	0.00339273
		390.2	0.00331266
		390.4	0.0032355
		390.6	0.00316129
		390.8	0.00309014
		391	0.00302214
		391.2	0.00295737
		391.4	0.00289591
		391.6	0.00283782
		391.8	0.00278317
		392	0.00273204
		392.2	0.00268445
		392.4	0.00264046
		392.6	0.00260013
		392.8	0.00256349
		393	0.00253056
		393.2	0.00250139
		393.4	0.00247599
		393.6	0.00245437
		393.8	0.00243658
		394	0.00242258
		394.2	0.00241239
		394.4	0.002406
		394.6	0.00240341
		394.8	0.0024046
		395	0.00240958
		395.2	0.0024183
		395.4	0.00243073
		395.6	0.00244688
		395.8	0.00246668
		396	0.00249007
		396.2	0.00251704
		396.4	0.00254753
		396.6	0.00258145
		396.8	0.00261884
		397	0.00265959
		397.2	0.00270364
		397.4	0.00275095
		397.6	0.00280142
		397.8	0.00285498
		398	0.00291157
		398.2	0.00297113
		398.4	0.00303355
		398.6	0.00309878
		398.8	0.00316674
		399	0.00323732
		399.2	0.00331048
		399.4	0.0033861
		399.6	0.00346409
		399.8	0.00354438
		400	0.00362687
		400.2	0.00371148
		400.4	0.00379816
		400.6	0.00388673
		400.8	0.00397716
		401	0.00406934
		401.2	0.0041632
		401.4	0.00425863
		401.6	0.00435555
		401.8	0.00445385
		402	0.00455347
		402.2	0.00465434
		402.4	0.00475635
		402.6	0.00485941
		402.8	0.00496345
		403	0.00506839
		403.2	0.00517415
		403.4	0.00528065
		403.6	0.00538783
		403.8	0.0054956
		404	0.0056039
		404.2	0.00571267
		404.4	0.00582185
		404.6	0.00593136
		404.8	0.00604119
		405	0.00615122
		405.2	0.00626146
		405.4	0.00637183
		405.6	0.00648231
		405.8	0.00659286
		406	0.00670343
		406.2	0.00681401
		406.4	0.00692456
		406.6	0.00703507
		406.8	0.00714554
		407	0.00725594
		407.2	0.00736622
		407.4	0.00747645
		407.6	0.0075866
		407.8	0.00769668
		408	0.0078067
		408.2	0.00791667
		408.4	0.00802663
		408.6	0.00813659
		408.8	0.00824658
		409	0.00835664
		409.2	0.0084668
		409.4	0.00857712
		409.6	0.00868762
		409.8	0.00879836
		410	0.00890937
		410.2	0.00902074
		410.4	0.0091325
		410.6	0.00924471
		410.8	0.00935742
		411	0.00947068
		411.2	0.00958456
		411.4	0.00969909
		411.6	0.00981433
		411.8	0.00993031
		412	0.0100471
		412.2	0.0101647
		412.4	0.0102831
		412.6	0.0104024
		412.8	0.0105225
		413	0.0106435
		413.2	0.0107654
		413.4	0.010888
		413.6	0.0110115
		413.8	0.0111356
		414	0.0112604
		414.2	0.0113858
		414.4	0.0115116
		414.6	0.0116377
		414.8	0.011764
		415	0.0118904
		415.2	0.0120167
		415.4	0.0121426
		415.6	0.012268
		415.8	0.0123926
		416	0.0125163
		416.2	0.0126388
		416.4	0.0127597
		416.6	0.0128789
		416.8	0.0129961
		417	0.013111
		417.2	0.0132233
		417.4	0.0133327
		417.6	0.0134389
		417.8	0.0135416
		418	0.0136406
		418.2	0.0137356
		418.4	0.0138263
		418.6	0.0139124
		418.8	0.0139939
		419	0.0140703
		419.2	0.0141416
		419.4	0.0142076
		419.6	0.0142681
		419.8	0.014323
		420	0.0143721
		420.2	0.0144155
		420.4	0.0144531
		420.6	0.0144849
		420.8	0.0145109
		421	0.0145312
		421.2	0.0145457
		421.4	0.0145547
		421.6	0.0145582
		421.8	0.0145564
		422	0.0145495
		422.2	0.0145376
		422.4	0.014521
		422.6	0.0145
		422.8	0.0144746
		423	0.0144453
		423.2	0.0144122
		423.4	0.0143757
		423.6	0.014336
		423.8	0.0142933
		424	0.014248
		424.2	0.0142003
		424.4	0.0141505
		424.6	0.0140988
		424.8	0.0140455
		425	0.0139908
		425.2	0.0139348
		425.4	0.0138779
		425.6	0.0138202
		425.8	0.0137618
		426	0.013703
		426.2	0.0136437
		426.4	0.0135843
		426.6	0.0135246
		426.8	0.0134649
		427	0.0134052
		427.2	0.0133455
		427.4	0.0132858
		427.6	0.0132263
		427.8	0.0131667
		428	0.0131072
		428.2	0.0130477
		428.4	0.0129882
		428.6	0.0129287
		428.8	0.0128689
		429	0.012809
		429.2	0.0127488
		429.4	0.0126882
		429.6	0.0126272
		429.8	0.0125657
		430	0.0125036
		430.2	0.0124408
		430.4	0.0123772
		430.6	0.0123127
		430.8	0.0122473
		431	0.0121809
		431.2	0.0121133
		431.4	0.0120445
		431.6	0.0119745
		431.8	0.0119032
		432	0.0118304
		432.2	0.0117562
		432.4	0.0116804
		432.6	0.0116031
		432.8	0.0115242
		433	0.0114436
		433.2	0.0113614
		433.4	0.0112774
		433.6	0.0111917
		433.8	0.0111042
		434	0.0110149
		434.2	0.0109238
		434.4	0.0108309
		434.6	0.0107363
		434.8	0.0106398
		435	0.0105415
		435.2	0.0104414
		435.4	0.0103396
		435.6	0.010236
		435.8	0.0101307
		436	0.0100237
		436.2	0.00991502
		436.4	0.0098047
		436.6	0.00969277
		436.8	0.00957928
		437	0.00946426
		437.2	0.00934777
		437.4	0.00922985
		437.6	0.00911055
		437.8	0.00898992
		438	0.00886802
		438.2	0.0087449
		438.4	0.00862065
		438.6	0.00849531
		438.8	0.00836894
		439	0.00824162
		439.2	0.00811341
		439.4	0.00798439
		439.6	0.00785463
		439.8	0.00772419
		440	0.00759316
		440.2	0.0074616
		440.4	0.00732961
		440.6	0.00719724
		440.8	0.0070646
		441	0.00693176
		441.2	0.00679879
		441.4	0.00666578
		441.6	0.00653281
		441.8	0.00639995
		442	0.0062673
		442.2	0.00613493
		442.4	0.00600291
		442.6	0.00587134
		442.8	0.00574029
		443	0.00560984
		443.2	0.00548006
		443.4	0.00535103
		443.6	0.00522283
		443.8	0.00509553
		444	0.0049692
		444.2	0.00484392
		444.4	0.00471973
		444.6	0.00459673
		444.8	0.00447498
		445	0.00435453
		445.2	0.00423544
		445.4	0.00411777
		445.6	0.00400158
		445.8	0.00388692
		446	0.00377384
		446.2	0.00366238
		446.4	0.00355259
		446.6	0.00344452
		446.8	0.00333819
		447	0.00323364
		447.2	0.00313093
		447.4	0.00303007
		447.6	0.00293108
		447.8	0.002834
		448	0.00273885
		448.2	0.00264563
		448.4	0.00255438
		448.6	0.00246511
		448.8	0.0023778
		449	0.00229251
		449.2	0.00220922
		449.4	0.00212792
		449.6	0.00204863
		449.8	0.00197132
		450	0.00189602
		450.2	0.00182271
		450.4	0.00175137
		450.6	0.00168201
		450.8	0.00161459
		451	0.00154911
		451.2	0.00148555
		451.4	0.0014239
		451.6	0.00136412
		451.8	0.0013062
		452	0.00125009
		452.2	0.00119582
		452.4	0.00114332
		452.6	0.00109258
		452.8	0.00104356
		453	0.00099621
		453.2	0.000950548
		453.4	0.000906515
		453.6	0.000864079
		453.8	0.000823207
		454	0.000783865
		454.2	0.000745999
		454.4	0.000709614
		454.6	0.000674652
		454.8	0.000641079
		455	0.00060884
		455.2	0.00057792
		455.4	0.000548301
		455.6	0.000519925
		455.8	0.000492758
		456	0.000466763
		456.2	0.000441904
		456.4	0.000418147
		456.6	0.000395455
		456.8	0.000373794
		457	0.000353131
		457.2	0.00033343
		457.4	0.00031464
		457.6	0.000296767
		457.8	0.000279757
		458	0.000263578
		458.2	0.0002482
		458.4	0.000233591
		458.6	0.000219721
		458.8	0.000206561
		459	0.000194082
		459.2	0.000182257
		459.4	0.000171057
		459.6	0.000160456
		459.8	0.000150429
		460	0.000140949
		460.2	0.000131993
		460.4	0.000123537
		460.6	0.000115558
		460.8	0.000108033
		461	0.000100941
		461.2	9.42618e-05
		461.4	8.79745e-05
		461.6	8.206e-05
		461.8	7.64997e-05
		462	7.12956e-05
		462.2	6.63741e-05
		462.4	6.17758e-05
		462.6	5.74284e-05
		462.8	5.33919e-05
		463	4.96115e-05
		463.2	4.60733e-05
		463.4	4.27639e-05
		463.6	3.96543e-05
		463.8	3.67672e-05
		464	3.40722e-05
		464.2	3.15583e-05
		464.4	2.91974e-05
		464.6	2.70168e-05
		464.8	2.4987e-05
		465	2.30992e-05
		465.2	2.13446e-05
		465.4	1.97154e-05
		465.6	1.82039e-05
		465.8	1.68027e-05
		466	1.55052e-05
		466.2	1.43048e-05
		466.4	1.31956e-05
		466.6	1.21717e-05
		466.8	1.12279e-05
		467	1.03592e-05
		467.2	9.56072e-06
		467.4	8.8282e-06
		467.6	8.1575e-06
		467.8	7.54481e-06
		468	6.98656e-06
		468.2	6.47948e-06
		468.4	6.02051e-06
		468.6	5.58891e-06
		468.8	5.20275e-06
		469	4.87644e-06
		469.2	4.58789e-06
		469.4	4.33521e-06
		469.6	4.11673e-06
		469.8	3.93095e-06
		470	3.77655e-06
		470.2	3.65237e-06
		470.4	3.55743e-06
		470.6	3.49092e-06
		470.8	3.45216e-06
		471	3.44064e-06
		471.2	3.456e-06
		471.4	3.49802e-06
		471.6	3.56662e-06
		471.8	3.66188e-06
		472	3.78399e-06
		472.2	3.9333e-06
		472.4	4.11026e-06
		472.6	4.3155e-06
		472.8	4.54973e-06
		473	4.81384e-06
		473.2	5.1088e-06
		473.4	5.41713e-06
		473.6	5.77906e-06
		473.8	6.17544e-06
		474	6.60781e-06
		474.2	7.07781e-06
		474.4	7.56914e-06
		474.6	8.12199e-06
		474.8	8.71794e-06
		475	9.35918e-06
		475.2	1.0048e-05
		475.4	1.07869e-05
		475.6	1.15784e-05
		475.8	1.24252e-05
		476	1.3313e-05
		476.2	1.42807e-05
		476.4	1.53124e-05
		476.6	1.64114e-05
		476.8	1.75635e-05
		477	1.88088e-05
		477.2	2.01315e-05
		477.4	2.15354e-05
		477.6	2.30244e-05
		477.8	2.46024e-05
		478	2.62735e-05
		478.2	2.80247e-05
		478.4	2.98967e-05
		478.6	3.18746e-05
		478.8	3.39627e-05
		479	3.61659e-05
		479.2	3.84887e-05
		479.4	4.0936e-05
		479.6	4.35127e-05
		479.8	4.62236e-05
		480	4.90738e-05
		480.2	5.20683e-05
		480.4	5.52122e-05
		480.6	5.85106e-05
		480.8	6.19686e-05
		481	6.55914e-05
		481.2	6.93841e-05
		481.4	7.33518e-05
		481.6	7.74997e-05
		481.8	8.18327e-05
		482	8.63558e-05
		482.2	9.10739e-05
		482.4	9.59918e-05
		482.6	0.000101114
		482.8	0.000106446
		483	0.000111991
		483.2	0.000117754
		483.4	0.000123738
		483.6	0.000129949
		483.8	0.000136388
		484	0.000143061
		484.2	0.000149969
		484.4	0.000157116
		484.6	0.000164505
		484.8	0.000172137
		485	0.000180014
		485.2	0.000188138
		485.4	0.00019651
		485.6	0.000205152
		485.8	0.000214025
		486	0.000223147
		486.2	0.000232517
		486.4	0.000242136
		486.6	0.000252
		486.8	0.000262108
		487	0.000272457
		487.2	0.000283044
		487.4	0.000293866
		487.6	0.000304918
		487.8	0.000316195
		488	0.000327692
		488.2	0.000339402
		488.4	0.00035132
		488.6	0.000363457
		488.8	0.000375769
		489	0.000388264
		489.2	0.000400934
		489.4	0.000413769
		489.6	0.000426759
		489.8	0.000439893
		490	0.000453159
		490.2	0.000466546
		490.4	0.000480041
		490.6	0.000493631
		490.8	0.000507302
		491	0.00052104
		491.2	0.000534831
		491.4	0.00054866
		491.6	0.000562511
		491.8	0.000576388
		492	0.000590237
		492.2	0.000604061
		492.4	0.000617842
		492.6	0.000631563
		492.8	0.000645207
		493	0.000658757
		493.2	0.000672195
		493.4	0.000685505
		493.6	0.000698667
		493.8	0.000711666
		494	0.000724483
		494.2	0.000737101
		494.4	0.000749503
		494.6	0.000761672
		494.8	0.000773592
		495	0.000785246
		495.2	0.000796619
		495.4	0.000807695
		495.6	0.000818459
		495.8	0.000828898
		496	0.000838996
		496.2	0.000848742
		496.4	0.000858123
		496.6	0.000867127
		496.8	0.000875744
		497	0.000883964
		497.2	0.000891778
		497.4	0.000899177
		497.6	0.000906155
		497.8	0.000912706
		498	0.000918824
		498.2	0.000924507
		498.4	0.00092975
		498.6	0.000934553
		498.8	0.000938916
		499	0.000942838
		499.2	0.000946322
		499.4	0.000949372
		499.6	0.000951991
		499.8	0.000954185
		500	0.000955961
		500.2	0.000957328
		500.4	0.000958294
		500.6	0.000958871
		500.8	0.00095907
		501	0.000958904
		501.2	0.000958387
		501.4	0.000957534
		501.6	0.000956362
		501.8	0.000954888
		502	0.000953131
		502.2	0.000951109
		502.4	0.000948843
		502.6	0.000946355
		502.8	0.000943665
		503	0.000940798
		503.2	0.000937776
		503.4	0.000934622
		503.6	0.000931363
		503.8	0.000928022
		504	0.000924625
		504.2	0.000921198
		504.4	0.000917767
		504.6	0.000914358
		504.8	0.000910997
		505	0.000907709
		505.2	0.000904523
		505.4	0.000901462
		505.6	0.000898553
		505.8	0.000895821
		506	0.00089329
		506.2	0.000890986
		506.4	0.000888931
		506.6	0.000887149
		506.8	0.000885662
		507	0.00088449
		507.2	0.000883655
		507.4	0.000883175
		507.6	0.000883069
		507.8	0.000883354
		508	0.000884045
		508.2	0.000885156
		508.4	0.000886702
		508.6	0.000888694
		508.8	0.000891141
		509	0.000894053
		509.2	0.000897437
		509.4	0.000901298
		509.6	0.000905639
		509.8	0.000910465
		510	0.000915774
		510.2	0.000921566
		510.4	0.000927838
		510.6	0.000934586
		510.8	0.000941804
		511	0.000949483
		511.2	0.000957615
		511.4	0.000966188
		511.6	0.000975191
		511.8	0.000984608
		512	0.000994424
		512.2	0.00100462
		512.4	0.00101518
		512.6	0.00102609
		512.8	0.00103732
		513	0.00104885
		513.2	0.00106065
		513.4	0.00107271
		513.6	0.001085
		513.8	0.00109748
		514	0.00111015
		514.2	0.00112295
		514.4	0.00113588
		514.6	0.0011489
		514.8	0.00116198
		515	0.00117509
		515.2	0.0011882
		515.4	0.00120129
		515.6	0.00121432
		515.8	0.00122727
		516	0.0012401
		516.2	0.00125279
		516.4	0.00126531
		516.6	0.00127763
		516.8	0.00128973
		517	0.00130158
		517.2	0.00131315
		517.4	0.00132443
		517.6	0.00133538
		517.8	0.00134599
		518	0.00135623
		518.2	0.00136609
		518.4	0.00137555
		518.6	0.00138459
		518.8	0.0013932
		519	0.00140135
		519.2	0.00140905
		519.4	0.00141627
		519.6	0.00142301
		519.8	0.00142927
		520	0.00143502
		520.2	0.00144028
		520.4	0.00144503
		520.6	0.00144928
		520.8	0.00145302
		521	0.00145625
		521.2	0.00145899
		521.4	0.00146122
		521.6	0.00146297
		521.8	0.00146422
		522	0.001465
		522.2	0.00146531
		522.4	0.00146516
		522.6	0.00146456
		522.8	0.00146353
		523	0.00146208
		523.2	0.00146022
		523.4	0.00145796
		523.6	0.00145533
		523.8	0.00145233
		524	0.00144899
		524.2	0.00144533
		524.4	0.00144135
		524.6	0.00143708
		524.8	0.00143253
		525	0.00142773
		525.2	0.00142269
		525.4	0.00141743
		525.6	0.00141197
		525.8	0.00140632
		526	0.00140051
		526.2	0.00139454
		526.4	0.00138844
		526.6	0.00138222
		526.8	0.00137591
		527	0.0013695
		527.2	0.00136302
		527.4	0.00135649
		527.6	0.00134991
		527.8	0.0013433
		528	0.00133668
		528.2	0.00133004
		528.4	0.00132341
		528.6	0.00131681
		528.8	0.00131021
		529	0.00130364
		529.2	0.00129711
		529.4	0.00129062
		529.6	0.00128419
		529.8	0.0012778
		530	0.00127148
		530.2	0.00126522
		530.4	0.00125902
		530.6	0.00125289
		530.8	0.00124684
		531	0.00124085
		531.2	0.00123493
		531.4	0.00122908
		531.6	0.0012233
		531.8	0.00121759
		532	0.00121195
		532.2	0.00120637
		532.4	0.00120085
		532.6	0.0011954
		532.8	0.00119
		533	0.00118465
		533.2	0.00117935
		533.4	0.00117409
		533.6	0.00116888
		533.8	0.0011637
		534	0.00115856
		534.2	0.00115345
		534.4	0.00114836
		534.6	0.0011433
		534.8	0.00113825
		535	0.00113321
		535.2	0.00112818
		535.4	0.00112316
		535.6	0.00111815
		535.8	0.00111313
		536	0.00110811
		536.2	0.00110308
		536.4	0.00109804
		536.6	0.001093
		536.8	0.00108794
		537	0.00108286
		537.2	0.00107777
		537.4	0.00107267
		537.6	0.00106752
		537.8	0.00106238
		538	0.00105723
		538.2	0.00105205
		538.4	0.00104686
		538.6	0.00104165
		538.8	0.00103643
		539	0.0010312
		539.2	0.00102595
		539.4	0.0010207
		539.6	0.00101544
		539.8	0.00101017
		540	0.00100491
		540.2	0.000999649
		540.4	0.000994395
		540.6	0.000989153
		540.8	0.000983925
		541	0.000978718
		541.2	0.000973534
		541.4	0.000968378
		541.6	0.000963257
		541.8	0.000958175
		542	0.000953136
		542.2	0.000948148
		542.4	0.000943215
		542.6	0.000938342
		542.8	0.000933537
		543	0.000928805
		543.2	0.000924151
		543.4	0.000919582
		543.6	0.000915105
		543.8	0.000910725
		544	0.000906448
		544.2	0.000902282
		544.4	0.000898231
		544.6	0.000894304
		544.8	0.000890505
		545	0.000886841
		545.2	0.000883319
		545.4	0.000879945
		545.6	0.000876725
		545.8	0.000873665
		546	0.000870772
		546.2	0.000868051
		546.4	0.000865508
		546.6	0.00086315
		546.8	0.000860981
		547	0.000859008
		547.2	0.000857237
		547.4	0.000855672
		547.6	0.000854319
		547.8	0.000853183
		548	0.000852268
		548.2	0.000851581
		548.4	0.000851124
		548.6	0.000850904
		548.8	0.000850923
		549	0.000851186
		549.2	0.000851696
		549.4	0.000852457
		549.6	0.000853472
		549.8	0.000854744
		550	0.000856275
		550.2	0.000858068
		550.4	0.000860125
		550.6	0.000862447
		550.8	0.000865035
		551	0.000867891
		551.2	0.000871034
		551.4	0.000874427
		551.6	0.000878087
		551.8	0.000882015
		552	0.000886208
		552.2	0.000890665
		552.4	0.000895384
		552.6	0.000900363
		552.8	0.000905597
		553	0.000911084
		553.2	0.000916818
		553.4	0.000922796
		553.6	0.000928996
		553.8	0.000935446
		554	0.000942122
		554.2	0.000949017
		554.4	0.000956122
		554.6	0.00096343
		554.8	0.000970932
		555	0.000978619
		555.2	0.000986481
		555.4	0.000994507
		555.6	0.00100269
		555.8	0.00101101
		556	0.00101946
		556.2	0.00102802
		556.4	0.00103669
		556.6	0.00104545
		556.8	0.00105428
		557	0.00106317
		557.2	0.00107211
		557.4	0.00108108
		557.6	0.00109005
		557.8	0.00109903
		558	0.00110798
		558.2	0.00111689
		558.4	0.00112574
		558.6	0.00113452
		558.8	0.00114321
		559	0.00115178
		559.2	0.00116024
		559.4	0.00116854
		559.6	0.00117666
		559.8	0.0011846
		560	0.00119234
		560.2	0.00119984
		560.4	0.00120711
		560.6	0.00121411
		560.8	0.00122083
		561	0.00122725
		561.2	0.00123335
		561.4	0.00123911
		561.6	0.00124453
		561.8	0.00124957
		562	0.00125423
		562.2	0.00125849
		562.4	0.00126233
		562.6	0.00126574
		562.8	0.00126871
		563	0.00127121
		563.2	0.00127325
		563.4	0.0012748
		563.6	0.00127586
		563.8	0.00127641
		564	0.00127646
		564.2	0.00127598
		564.4	0.00127497
		564.6	0.00127342
		564.8	0.00127134
		565	0.00126871
		565.2	0.00126554
		565.4	0.00126181
		565.6	0.00125753
		565.8	0.0012527
		566	0.00124733
		566.2	0.0012414
		566.4	0.00123492
		566.6	0.00122791
		566.8	0.00122038
		567	0.0012123
		567.2	0.0012037
		567.4	0.00119459
		567.6	0.00118497
		567.8	0.00117485
		568	0.00116425
		568.2	0.00115318
		568.4	0.00114165
		568.6	0.00112968
		568.8	0.00111728
		569	0.00110446
		569.2	0.00109124
		569.4	0.00107764
		569.6	0.00106368
		569.8	0.00104939
		570	0.00103475
		570.2	0.0010198
		570.4	0.00100456
		570.6	0.000989055
		570.8	0.000973297
		571	0.000957309
		571.2	0.000941113
		571.4	0.000924728
		571.6	0.000908177
		571.8	0.000891479
		572	0.000874656
		572.2	0.00085773
		572.4	0.000840721
		572.6	0.00082365
		572.8	0.000806538
		573	0.000789406
		573.2	0.000772274
		573.4	0.000755161
		573.6	0.000738089
		573.8	0.000721076
		574	0.000704141
		574.2	0.000687304
		574.4	0.000670581
		574.6	0.000653991
		574.8	0.000637551
		575	0.000621278
		575.2	0.000605188
		575.4	0.000589296
		575.6	0.000573618
		575.8	0.000558167
		576	0.000542958
		576.2	0.000528004
		576.4	0.000513317
		576.6	0.000498909
		576.8	0.000484774
		577	0.00047096
		577.2	0.000457456
		577.4	0.000444274
		577.6	0.000431421
		577.8	0.000418905
		578	0.000406735
		578.2	0.000394917
		578.4	0.000383458
		578.6	0.000372363
		578.8	0.000361639
		579	0.00035129
		579.2	0.00034132
		579.4	0.000331734
		579.6	0.000322534
		579.8	0.000313724
		580	0.000305306
		580.2	0.000297283
		580.4	0.000289656
		580.6	0.000282427
		580.8	0.000275597
		581	0.000269167
		581.2	0.000263137
		581.4	0.000257508
		581.6	0.00025228
		581.8	0.000247452
		582	0.000243025
		582.2	0.000238998
		582.4	0.000235371
		582.6	0.000232142
		582.8	0.000229311
		583	0.000226877
		583.2	0.000224839
		583.4	0.000223196
		583.6	0.000221947
		583.8	0.000221092
		584	0.000220628
		584.2	0.000220556
		584.4	0.000220874
		584.6	0.000221581
		584.8	0.000222677
		585	0.00022416
		585.2	0.00022603
		585.4	0.000228285
		585.6	0.000230927
		585.8	0.000233953
		586	0.000237364
		586.2	0.000241159
		586.4	0.000245338
		586.6	0.0002499
		586.8	0.000254846
		587	0.000260195
		587.2	0.000265909
		587.4	0.000272007
		587.6	0.000278488
		587.8	0.000285353
		588	0.000292601
		588.2	0.000300234
		588.4	0.00030825
		588.6	0.00031665
		588.8	0.000325435
		589	0.000334604
		589.2	0.000344156
		589.4	0.000354093
		589.6	0.000364414
		589.8	0.000375118
		590	0.000386205
		590.2	0.000397674
		590.4	0.000409525
		590.6	0.000421757
		590.8	0.000434368
		591	0.000447357
		591.2	0.000460723
		591.4	0.000474463
		591.6	0.000488576
		591.8	0.000503058
		592	0.000517908
		592.2	0.000533122
		592.4	0.000548695
		592.6	0.000564626
		592.8	0.000580909
		593	0.00059754
		593.2	0.000614513
		593.4	0.000631823
		593.6	0.000649465
		593.8	0.000667431
		594	0.000685716
		594.2	0.000704311
		594.4	0.000723209
		594.6	0.000742402
		594.8	0.000761881
		595	0.000781637
		595.2	0.000801659
		595.4	0.000821939
		595.6	0.000842466
		595.8	0.000863227
		596	0.000884212
		596.2	0.000905409
		596.4	0.000926805
		596.6	0.000948387
		596.8	0.000970142
		597	0.000992056
		597.2	0.00101411
		597.4	0.0010363
		597.6	0.00105861
		597.8	0.00108101
		598	0.0011035
		598.2	0.00112606
		598.4	0.00114867
		598.6	0.00117132
		598.8	0.00119399
		599	0.00121666
		599.2	0.00123932
		599.4	0.00126194
		599.6	0.00128452
		599.8	0.00130704
		600	0.00132947
		600.2	0.0013518
		600.4	0.00137402
		600.6	0.0013961
		600.8	0.00141804
		601	0.00143981
		601.2	0.0014614
		601.4	0.00148279
		601.6	0.00150397
		601.8	0.00152491
		602	0.00154562
		602.2	0.00156606
		602.4	0.00158623
		602.6	0.00160611
		602.8	0.0016257
		603	0.00164497
		603.2	0.00166391
		603.4	0.0016825
		603.6	0.00170077
		603.8	0.00171867
		604	0.00173621
		604.2	0.00175338
		604.4	0.00177016
		604.6	0.00178655
		604.8	0.00180254
		605	0.00181813
		605.2	0.00183331
		605.4	0.00184807
		605.6	0.00186242
		605.8	0.00187636
		606	0.00188987
		606.2	0.00190296
		606.4	0.00191563
		606.6	0.00192789
		606.8	0.00193972
		607	0.00195114
		607.2	0.00196214
		607.4	0.00197273
		607.6	0.00198293
		607.8	0.00199272
		608	0.00200212
		608.2	0.00201113
		608.4	0.00201977
		608.6	0.00202803
		608.8	0.00203594
		609	0.00204349
		609.2	0.0020507
		609.4	0.00205758
		609.6	0.00206413
		609.8	0.00207038
		610	0.00207633
		610.2	0.00208199
		610.4	0.00208738
		610.6	0.00209251
		610.8	0.00209739
		611	0.00210202
		611.2	0.00210644
		611.4	0.00211066
		611.6	0.00211468
		611.8	0.00211851
		612	0.00212218
		612.2	0.00212569
		612.4	0.00212906
		612.6	0.00213229
		612.8	0.00213541
		613	0.00213842
		613.2	0.00214134
		613.4	0.00214418
		613.6	0.00214694
		613.8	0.00214964
		614	0.0021523
		614.2	0.00215491
		614.4	0.00215749
		614.6	0.00216005
		614.8	0.0021626
		615	0.00216514
		615.2	0.00216768
		615.4	0.00217022
		615.6	0.00217278
		615.8	0.00217535
		616	0.00217795
		616.2	0.00218057
		616.4	0.00218321
		616.6	0.00218589
		616.8	0.00218859
		617	0.00219133
		617.2	0.00219409
		617.4	0.00219688
		617.6	0.0021997
		617.8	0.00220255
		618	0.00220541
		618.2	0.00220829
		618.4	0.00221119
		618.6	0.00221409
		618.8	0.00221698
		619	0.00221988
		619.2	0.00222275
		619.4	0.00222561
		619.6	0.00222843
		619.8	0.00223121
		620	0.00223394
		620.2	0.00223661
		620.4	0.0022392
		620.6	0.00224171
		620.8	0.00224413
		621	0.00224644
		621.2	0.00224863
		621.4	0.00225068
		621.6	0.00225259
		621.8	0.00225434
		622	0.00225592
		622.2	0.00225731
		622.4	0.0022585
		622.6	0.00225948
		622.8	0.00226022
		623	0.00226073
		623.2	0.00226098
		623.4	0.00226096
		623.6	0.00226066
		623.8	0.00226006
		624	0.00225915
		624.2	0.00225792
		624.4	0.00225635
		624.6	0.00225443
		624.8	0.00225216
		625	0.00224951
		625.2	0.00224649
		625.4	0.00224306
		625.6	0.00223924
		625.8	0.002235
		626	0.00223034
		626.2	0.00222525
		626.4	0.00221972
		626.6	0.00221374
		626.8	0.00220731
		627	0.00220042
		627.2	0.00219306
		627.4	0.00218524
		627.6	0.00217694
		627.8	0.00216817
		628	0.00215892
		628.2	0.00214918
		628.4	0.00213896
		628.6	0.00212827
		628.8	0.00211708
		629	0.00210542
		629.2	0.00209328
		629.4	0.00208066
		629.6	0.00206757
		629.8	0.00205401
		630	0.00203999
		630.2	0.0020255
		630.4	0.00201057
		630.6	0.00199518
		630.8	0.00197936
		631	0.00196312
		631.2	0.00194645
		631.4	0.00192936
		631.6	0.00191188
		631.8	0.00189401
		632	0.00187575
		632.2	0.00185713
		632.4	0.00183816
		632.6	0.00181884
		632.8	0.00179919
		633	0.00177922
		633.2	0.00175895
		633.4	0.0017384
		633.6	0.00171757
		633.8	0.00169648
		634	0.00167514
		634.2	0.00165358
		634.4	0.00163181
		634.6	0.00160983
		634.8	0.00158768
		635	0.00156536
		635.2	0.00154289
		635.4	0.00152029
		635.6	0.00149757
		635.8	0.00147475
		636	0.00145185
		636.2	0.00142887
		636.4	0.00140585
		636.6	0.00138278
		636.8	0.00135969
		637	0.00133659
		637.2	0.00131351
		637.4	0.00129044
		637.6	0.00126742
		637.8	0.00124444
		638	0.00122153
		638.2	0.00119871
		638.4	0.00117597
		638.6	0.00115334
		638.8	0.00113083
		639	0.00110846
		639.2	0.00108622
		639.4	0.00106415
		639.6	0.00104224
		639.8	0.0010205
		640	0.000998955
		640.2	0.000977605
		640.4	0.000956463
		640.6	0.000935536
		640.8	0.000914833
		641	0.000894362
		641.2	0.000874132
		641.4	0.000854148
		641.6	0.000834418
		641.8	0.000814947
		642	0.000795743
		642.2	0.000776809
		642.4	0.000758151
		642.6	0.000739773
		642.8	0.000721679
		643	0.000703872
		643.2	0.000686357
		643.4	0.000669134
		643.6	0.000652208
		643.8	0.000635579
		644	0.000619249
		644.2	0.000603219
		644.4	0.000587491
		644.6	0.000572064
		644.8	0.000556938
		645	0.000542113
		645.2	0.000527589
		645.4	0.000513347
		645.6	0.000499424
		645.8	0.000485797
		646	0.000472465
		646.2	0.000459427
		646.4	0.00044668
		646.6	0.000434221
		646.8	0.000422048
		647	0.000410158
		647.2	0.000398549
		647.4	0.000387216
		647.6	0.000376157
		647.8	0.000365367
		648	0.000354844
		648.2	0.000344584
		648.4	0.000334581
		648.6	0.000324834
		648.8	0.000315336
		649	0.000306085
		649.2	0.000297075
		649.4	0.000288304
		649.6	0.000279765
		649.8	0.000271455
		650	0.000263369
		650.2	0.000255503
		650.4	0.000247852
		650.6	0.000240412
		650.8	0.000233177
		651	0.000226145
		651.2	0.00021931
		651.4	0.000212667
		651.6	0.000206212
		651.8	0.000199941
		652	0.00019385
		652.2	0.000187933
		652.4	0.000182187
		652.6	0.000176607
		652.8	0.00017119
		653	0.00016593
		653.2	0.000160824
		653.4	0.000155869
		653.6	0.000151058
		653.8	0.00014639
		654	0.00014186
		654.2	0.000137464
		654.4	0.000133199
		654.6	0.000129061
		654.8	0.000125046
		655	0.000121151
		655.2	0.000117373
		655.4	0.000113707
		655.6	0.000110152
		655.8	0.000106704
		656	0.000103359
		656.2	0.000100115
		656.4	9.69688e-05
		656.6	9.39174e-05
		656.8	9.0958e-05
		657	8.8088e-05
		657.2	8.53047e-05
		657.4	8.26055e-05
		657.6	7.9988e-05
		657.8	7.74496e-05
		658	7.49881e-05
		658.2	7.26011e-05
		658.4	7.02865e-05
		658.6	6.80419e-05
		658.8	6.58655e-05
		659	6.3755e-05
		659.2	6.17085e-05
		659.4	5.97242e-05
		659.6	5.78001e-05
		659.8	5.59344e-05
		660	5.41254e-05
		660.2	5.23714e-05
		660.4	5.06708e-05
		660.6	4.9022e-05
		660.8	4.74233e-05
		661	4.58734e-05
		661.2	4.43707e-05
		661.4	4.29139e-05
		661.6	4.15016e-05
		661.8	4.01325e-05
		662	3.88053e-05
		662.2	3.75187e-05
		662.4	3.62717e-05
		662.6	3.50629e-05
		662.8	3.38913e-05
		663	3.27558e-05
		663.2	3.16553e-05
		663.4	3.05888e-05
		663.6	2.95553e-05
		663.8	2.85538e-05
		664	2.75834e-05
		664.2	2.66432e-05
		664.4	2.57323e-05
		664.6	2.48499e-05
		664.8	2.39951e-05
		665	2.31671e-05
		665.2	2.23651e-05
		665.4	2.15884e-05
		665.6	2.08363e-05
		665.8	2.0108e-05
		666	1.94028e-05
		666.2	1.872e-05
		666.4	1.80591e-05
		666.6	1.74194e-05
		666.8	1.68002e-05
		667	1.62009e-05
		667.2	1.5621e-05
		667.4	1.50599e-05
		667.6	1.45171e-05
		667.8	1.3992e-05
		668	1.3484e-05
		668.2	1.29744e-05
		668.4	1.25006e-05
		668.6	1.20425e-05
		668.8	1.15994e-05
		669	1.11712e-05
		669.2	1.07572e-05
		669.4	1.0357e-05
		669.6	9.97032e-06
		669.8	9.59667e-06
		670	9.23567e-06
		670.2	8.88695e-06
		670.4	8.55013e-06
		670.6	8.22486e-06
		670.8	7.89309e-06
		671	7.59159e-06
		671.2	7.30043e-06
		671.4	7.01933e-06
		671.6	6.74797e-06
		671.8	6.48607e-06
		672	6.23333e-06
		672.2	5.98947e-06
		672.4	5.75423e-06
		672.6	5.52733e-06
		672.8	5.30853e-06
		673	5.09756e-06
		673.2	4.89417e-06
		673.4	4.69814e-06
		673.6	4.50923e-06
		673.8	4.3272e-06
		674	4.15184e-06
		674.2	3.98294e-06
		674.4	3.82028e-06
		674.6	3.66366e-06
		674.8	3.51288e-06
		675	3.36775e-06
		675.2	3.22808e-06
		675.4	3.0937e-06
		675.6	2.96441e-06
		675.8	2.84006e-06
		676	2.72047e-06
		676.2	2.60549e-06
		676.4	2.49494e-06
		676.6	2.37075e-06
		676.8	2.26999e-06
		677	2.17314e-06
		677.2	2.08005e-06
		677.4	1.99061e-06
		677.6	1.90467e-06
		677.8	1.82212e-06
		678	1.74285e-06
		678.2	1.66673e-06
		678.4	1.59366e-06
		678.6	1.52352e-06
		678.8	1.45621e-06
		679	1.39163e-06
		679.2	1.32969e-06
		679.4	1.27027e-06
		679.6	1.2133e-06
		679.8	1.15868e-06
		680	1.10633e-06
		680.2	1.05615e-06
		680.4	1.00808e-06
		680.6	9.62021e-07
		680.8	9.17908e-07
		681	8.75663e-07
		681.2	8.35216e-07
		681.4	7.96497e-07
		681.6	7.5944e-07
		681.8	7.2398e-07
		682	6.90054e-07
		682.2	6.57603e-07
		682.4	6.26568e-07
		682.6	5.96892e-07
		682.8	5.68523e-07
		683	5.41406e-07
		683.2	5.15493e-07
		683.4	4.90733e-07
		683.6	4.67081e-07
		683.8	4.4449e-07
		684	4.22918e-07
		684.2	4.02323e-07
		684.4	3.82663e-07
		684.6	3.639e-07
		684.8	3.45996e-07
		685	3.28915e-07
		685.2	3.12623e-07
		685.4	2.97085e-07
		685.6	2.8227e-07
		685.8	2.68147e-07
		686	2.54686e-07
		686.2	2.41858e-07
		686.4	2.29635e-07
		686.6	2.17992e-07
		686.8	2.06904e-07
		687	1.96344e-07
		687.2	1.86291e-07
		687.4	1.76722e-07
		687.6	1.67615e-07
		687.8	1.58949e-07
		688	1.50704e-07
		688.2	1.42863e-07
		688.4	1.35405e-07
		688.6	1.28315e-07
		688.8	1.21574e-07
		689	1.15167e-07
		689.2	1.09078e-07
		689.4	1.03294e-07
		689.6	9.77987e-08
		689.8	9.25797e-08
		690	8.76239e-08
		690.2	8.29187e-08
		690.4	7.84525e-08
		690.6	7.42137e-08
		690.8	7.01917e-08
		691	6.6376e-08
		691.2	6.27567e-08
		691.4	5.93243e-08
		691.6	5.60698e-08
		691.8	5.29845e-08
		692	5.00602e-08
		692.2	4.72891e-08
		692.4	4.46634e-08
		692.6	4.21762e-08
		692.8	3.98204e-08
		693	3.75897e-08
		693.2	3.54777e-08
		693.4	3.34784e-08
		693.6	3.15863e-08
		693.8	2.97959e-08
		694	2.8102e-08
		694.2	2.64998e-08
		694.4	2.49846e-08
		694.6	2.35518e-08
		694.8	2.21973e-08
		695	2.09171e-08
		695.2	1.97072e-08
		695.4	0
		695.6	0
		695.8	0
		696	0
		696.2	0
		696.4	0
		696.6	0
		696.8	0
		697	0
		697.2	0
		697.4	0
		697.6	0
		697.8	0
		698	0
		698.2	0
		698.4	0
		698.6	0
		698.8	0
		699	0
		699.2	0
		699.4	0
		699.6	0
		699.8	0
[truncated: 1 more rows]

## Sheet: PlotDat10
Source sheet	data	340	1.77243e-06
Plot name	ProbDens10	340.055	1.80921e-06
Plot Type	16	340.11	1.8467e-06
1st free col	5	340.165	1.88492e-06
Sigma Level	2	340.22	1.92386e-06
Absolute Errs	TRUE	340.275	1.96355e-06
Symbol Type	5	340.33	2.00399e-06
Inverse Plot	FALSE	340.385	2.04521e-06
Color Plot	FALSE	340.44	2.08721e-06
3D plot	FALSE	340.495	2.13e-06
Linear	FALSE	340.55	2.17361e-06
Data Range	AD618:AE644	340.605	2.21804e-06
Filled Symbols	TRUE	340.66	2.26331e-06
ConcAge	FALSE	340.715	2.30944e-06
ConcSwap	FALSE	340.77	2.35643e-06
1st Symbol-row	1	340.825	2.40431e-06
		340.88	2.45308e-06
		340.935	2.50277e-06
		340.99	2.55338e-06
		341.045	2.60494e-06
		341.1	2.65745e-06
		341.155	2.71095e-06
		341.21	2.76543e-06
		341.265	2.82092e-06
		341.32	2.87744e-06
		341.375	2.935e-06
		341.43	2.99362e-06
		341.485	3.05332e-06
		341.54	3.11411e-06
		341.595	3.17602e-06
		341.65	3.23905e-06
		341.705	3.30324e-06
		341.76	3.36859e-06
		341.815	3.43514e-06
		341.87	3.50289e-06
		341.925	3.57186e-06
		341.98	3.64208e-06
		342.035	3.75085e-06
		342.09	3.82482e-06
		342.145	3.90013e-06
		342.2	3.9768e-06
		342.255	4.05487e-06
		342.31	4.13434e-06
		342.365	4.21525e-06
		342.42	4.29761e-06
		342.475	4.38146e-06
		342.53	4.46681e-06
		342.585	4.55369e-06
		342.64	4.64212e-06
		342.695	4.73213e-06
		342.75	4.82375e-06
		342.805	4.91699e-06
		342.86	5.01189e-06
		342.915	5.10847e-06
		342.97	5.20676e-06
		343.025	5.30679e-06
		343.08	5.40857e-06
		343.135	5.51215e-06
		343.19	5.61755e-06
		343.245	5.7248e-06
		343.3	5.83392e-06
		343.355	5.94495e-06
		343.41	6.05791e-06
		343.465	6.17284e-06
		343.52	6.28977e-06
		343.575	6.40873e-06
		343.63	6.52974e-06
		343.685	6.65285e-06
		343.74	6.77807e-06
		343.795	6.90546e-06
		343.85	7.03503e-06
		343.905	7.16683e-06
		343.96	7.30088e-06
		344.015	7.43722e-06
		344.07	7.57589e-06
		344.125	7.71692e-06
		344.18	7.86034e-06
		344.235	8.0062e-06
		344.29	8.15453e-06
		344.345	8.30536e-06
		344.4	8.45874e-06
		344.455	8.6147e-06
		344.51	8.77328e-06
		344.565	8.93453e-06
		344.62	9.09847e-06
		344.675	9.26515e-06
		344.73	9.43461e-06
		344.785	9.60689e-06
		344.84	9.78204e-06
		344.895	9.96009e-06
		344.95	1.01411e-05
		345.005	1.03251e-05
		345.06	1.05121e-05
		345.115	1.07022e-05
		345.17	1.08954e-05
		345.225	1.10918e-05
		345.28	1.12914e-05
		345.335	1.14943e-05
		345.39	1.17005e-05
		345.445	1.191e-05
		345.5	1.21229e-05
		345.555	1.23393e-05
		345.61	1.25592e-05
		345.665	1.27827e-05
		345.72	1.30097e-05
		345.775	1.32404e-05
		345.83	1.34748e-05
		345.885	1.3713e-05
		345.94	1.39549e-05
		345.995	1.42008e-05
		346.05	1.44505e-05
		346.105	1.47042e-05
		346.16	1.4962e-05
		346.215	1.52238e-05
		346.27	1.54897e-05
		346.325	1.57599e-05
		346.38	1.60343e-05
		346.435	1.6313e-05
		346.49	1.65961e-05
		346.545	1.68837e-05
		346.6	1.71757e-05
		346.655	1.751e-05
		346.71	1.78127e-05
		346.765	1.81201e-05
		346.82	1.84323e-05
		346.875	1.87494e-05
		346.93	1.90714e-05
		346.985	1.93984e-05
		347.04	1.97305e-05
		347.095	2.01049e-05
		347.15	2.04486e-05
		347.205	2.07977e-05
		347.26	2.11522e-05
		347.315	2.15122e-05
		347.37	2.18777e-05
		347.425	2.22488e-05
		347.48	2.26256e-05
		347.535	2.30082e-05
		347.59	2.33967e-05
		347.645	2.37911e-05
		347.7	2.41915e-05
		347.755	2.4598e-05
		347.81	2.50107e-05
		347.865	2.54296e-05
		347.92	2.58549e-05
		347.975	2.62866e-05
		348.03	2.67249e-05
		348.085	2.71697e-05
		348.14	2.76212e-05
		348.195	2.80795e-05
		348.25	2.85447e-05
		348.305	2.90168e-05
		348.36	2.9496e-05
		348.415	2.99824e-05
		348.47	3.04759e-05
		348.525	3.09769e-05
		348.58	3.14852e-05
		348.635	3.20011e-05
		348.69	3.25246e-05
		348.745	3.30933e-05
		348.8	3.36336e-05
		348.855	3.41819e-05
		348.91	3.47383e-05
		348.965	3.53029e-05
		349.02	3.58757e-05
		349.075	3.6457e-05
		349.13	3.70467e-05
		349.185	3.76451e-05
		349.24	3.82522e-05
		349.295	3.88682e-05
		349.35	3.94931e-05
		349.405	4.01271e-05
		349.46	4.07703e-05
		349.515	4.14228e-05
		349.57	4.20847e-05
		349.625	4.27562e-05
		349.68	4.34753e-05
		349.735	4.41672e-05
		349.79	4.4869e-05
		349.845	4.55809e-05
		349.9	4.6303e-05
		349.955	4.70354e-05
		350.01	4.77783e-05
		350.065	4.85318e-05
		350.12	4.92961e-05
		350.175	5.00712e-05
		350.23	5.08573e-05
		350.285	5.16546e-05
		350.34	5.24632e-05
		350.395	5.32832e-05
		350.45	5.41149e-05
		350.505	5.49582e-05
		350.56	5.58134e-05
		350.615	5.66807e-05
		350.67	5.75601e-05
		350.725	5.84519e-05
		350.78	5.93562e-05
		350.835	6.02731e-05
		350.89	6.12028e-05
		350.945	6.21455e-05
		351	6.31013e-05
		351.055	6.41084e-05
		351.11	6.50923e-05
		351.165	6.60898e-05
		351.22	6.71013e-05
		351.275	6.81267e-05
		351.33	6.91664e-05
		351.385	7.02204e-05
		351.44	7.1289e-05
		351.495	7.23723e-05
		351.55	7.35089e-05
		351.605	7.46243e-05
		351.66	7.57552e-05
		351.715	7.69016e-05
		351.77	7.80639e-05
		351.825	7.92422e-05
		351.88	8.04739e-05
		351.935	8.16861e-05
		351.99	8.29149e-05
		352.045	8.41606e-05
		352.1	8.54613e-05
		352.155	8.67427e-05
		352.21	8.80417e-05
		352.265	8.93585e-05
		352.32	9.06934e-05
		352.375	9.20465e-05
		352.43	9.34181e-05
		352.485	9.48085e-05
		352.54	9.62178e-05
		352.595	9.76464e-05
		352.65	9.90944e-05
		352.705	0.000100562
		352.76	0.00010205
		352.815	0.000103558
		352.87	0.000105086
		352.925	0.000106636
		352.98	0.000108206
		353.035	0.000109797
		353.09	0.000111448
		353.145	0.000113123
		353.2	0.000114783
		353.255	0.000116465
		353.31	0.00011817
		353.365	0.000119899
		353.42	0.00012165
		353.475	0.000123426
		353.53	0.000125225
		353.585	0.000127049
		353.64	0.000128898
		353.695	0.000130771
		353.75	0.00013267
		353.805	0.000134595
		353.86	0.000136545
		353.915	0.000138522
		353.97	0.000140526
		354.025	0.000142557
		354.08	0.000144615
		354.135	0.000146701
		354.19	0.000148815
		354.245	0.000150995
		354.3	0.000153206
		354.355	0.000155412
		354.41	0.000157647
		354.465	0.000159913
		354.52	0.00016221
		354.575	0.000164539
		354.63	0.000166899
		354.685	0.000169291
		354.74	0.000171715
		354.795	0.000174173
		354.85	0.000176664
		354.905	0.00017919
		354.96	0.00018175
		355.015	0.000184344
		355.07	0.000187013
		355.125	0.000189682
		355.18	0.000192387
		355.235	0.00019513
		355.29	0.00019791
		355.345	0.000200728
		355.4	0.000203586
		355.455	0.000206483
		355.51	0.00020942
		355.565	0.000212397
		355.62	0.000215416
		355.675	0.000218477
		355.73	0.00022158
		355.785	0.000224726
		355.84	0.000227917
		355.895	0.000231151
		355.95	0.000234431
		356.005	0.000237757
		356.06	0.000241129
		356.115	0.000244549
		356.17	0.000248016
		356.225	0.000251572
		356.28	0.00025514
		356.335	0.000258758
		356.39	0.000262466
		356.445	0.000266189
		356.5	0.000269966
		356.555	0.000273796
		356.61	0.000277681
		356.665	0.000281622
		356.72	0.000285619
		356.775	0.000289673
		356.83	0.000293786
		356.885	0.000297959
		356.94	0.000302192
		356.995	0.000306486
		357.05	0.000310843
		357.105	0.000315263
		357.16	0.000319785
		357.215	0.000324337
		357.27	0.000328956
		357.325	0.000333643
		357.38	0.000338399
		357.435	0.000343226
		357.49	0.000348124
		357.545	0.000353095
		357.6	0.000358141
		357.655	0.000363262
		357.71	0.000368459
		357.765	0.000373735
		357.82	0.000379091
		357.875	0.000384528
		357.93	0.000390047
		357.985	0.000395651
		358.04	0.00040134
		358.095	0.000407116
		358.15	0.000412981
		358.205	0.000418937
		358.26	0.000424985
		358.315	0.000431164
		358.37	0.000437403
		358.425	0.000443739
		358.48	0.000450175
		358.535	0.000456712
		358.59	0.000463352
		358.645	0.000470097
		358.7	0.000477027
		358.755	0.000483992
		358.81	0.000491069
		358.865	0.000498259
		358.92	0.000505566
		358.975	0.00051299
		359.03	0.000520535
		359.085	0.000528202
		359.14	0.000535994
		359.195	0.000543914
		359.25	0.000551965
		359.305	0.000560148
		359.36	0.000568466
		359.415	0.000576922
		359.47	0.000585519
		359.525	0.00059426
		359.58	0.000603147
		359.635	0.000612183
		359.69	0.000621372
		359.745	0.000630717
		359.8	0.00064022
		359.855	0.000649884
		359.91	0.000659714
		359.965	0.000669713
		360.02	0.000679883
		360.075	0.000690228
		360.13	0.000700753
		360.185	0.00071146
		360.24	0.000722353
		360.295	0.000733436
		360.35	0.000744713
		360.405	0.000756189
		360.46	0.000767866
		360.515	0.000779749
		360.57	0.000791842
		360.625	0.00080415
		360.68	0.000816677
		360.735	0.000829428
		360.79	0.000842406
		360.845	0.000855618
		360.9	0.000869066
		360.955	0.000882757
		361.01	0.000896695
		361.065	0.000910885
		361.12	0.000925333
		361.175	0.000940043
		361.23	0.000955021
		361.285	0.000970311
		361.34	0.000985843
		361.395	0.00100166
		361.45	0.00101777
		361.505	0.00103417
		361.56	0.00105088
		361.615	0.00106789
		361.67	0.00108522
		361.725	0.00110287
		361.78	0.00112084
		361.835	0.00113915
		361.89	0.0011578
		361.945	0.0011768
		362	0.00119615
		362.055	0.00121586
		362.11	0.00123594
		362.165	0.0012564
		362.22	0.00127723
		362.275	0.00129846
		362.33	0.00132009
		362.385	0.00134211
		362.44	0.00136456
		362.495	0.00138742
		362.55	0.00141071
		362.605	0.00143444
		362.66	0.00145861
		362.715	0.00148324
		362.77	0.00150833
		362.825	0.00153389
		362.88	0.00155993
		362.935	0.00158646
		362.99	0.00161348
		363.045	0.00164102
		363.1	0.00166906
		363.155	0.00169763
		363.21	0.00172674
		363.265	0.00175639
		363.32	0.00178659
		363.375	0.00181736
		363.43	0.00184869
		363.485	0.00188062
		363.54	0.00191313
		363.595	0.00194625
		363.65	0.00197998
		363.705	0.00201433
		363.76	0.00204932
		363.815	0.00208495
		363.87	0.00212128
		363.925	0.00215824
		363.98	0.00219587
		364.035	0.00223419
		364.09	0.00227325
		364.145	0.00231298
		364.2	0.00235343
		364.255	0.00239462
		364.31	0.00243655
		364.365	0.00247923
		364.42	0.00252268
		364.475	0.00256691
		364.53	0.00261193
		364.585	0.00265775
		364.64	0.00270438
		364.695	0.00275184
		364.75	0.00280013
		364.805	0.00284927
		364.86	0.00289927
		364.915	0.00295014
		364.97	0.00300189
		365.025	0.00305454
		365.08	0.0031081
		365.135	0.00316257
		365.19	0.00321798
		365.245	0.00327432
		365.3	0.00333162
		365.355	0.00338989
		365.41	0.00344913
		365.465	0.00350936
		365.52	0.00357059
		365.575	0.00363284
		365.63	0.0036961
		365.685	0.0037604
		365.74	0.00382575
		365.795	0.00389216
		365.85	0.00395963
		365.905	0.00402818
		365.96	0.00409783
		366.015	0.00416857
		366.07	0.00424043
		366.125	0.00431341
		366.18	0.00438752
		366.235	0.00446277
		366.29	0.00453918
		366.345	0.00461675
		366.4	0.0046955
		366.455	0.00477543
		366.51	0.00485655
		366.565	0.00493887
		366.62	0.00502241
		366.675	0.00510719
		366.73	0.00519318
		366.785	0.00528039
		366.84	0.00536885
		366.895	0.00545857
		366.95	0.00554954
		367.005	0.00564178
		367.06	0.0057353
		367.115	0.0058301
		367.17	0.00592618
		367.225	0.00602356
		367.28	0.00612223
		367.335	0.00622221
		367.39	0.0063235
		367.445	0.00642611
		367.5	0.00653004
		367.555	0.00663528
		367.61	0.00674186
		367.665	0.00684977
		367.72	0.00695901
		367.775	0.00706958
		367.83	0.0071815
		367.885	0.00729475
		367.94	0.00740935
		367.995	0.00752529
		368.05	0.00764257
		368.105	0.00776119
		368.16	0.00788116
		368.215	0.00800247
		368.27	0.00812512
		368.325	0.00824911
		368.38	0.00837444
		368.435	0.0085011
		368.49	0.00862909
		368.545	0.00875841
		368.6	0.00888905
		368.655	0.00902101
		368.71	0.00915428
		368.765	0.00928886
		368.82	0.00942475
		368.875	0.00956192
		368.93	0.00970039
		368.985	0.00984014
		369.04	0.00998115
		369.095	0.0101234
		369.15	0.010267
		369.205	0.0104117
		369.26	0.0105578
		369.315	0.010705
		369.37	0.0108534
		369.425	0.0110031
		369.48	0.0111539
		369.535	0.0113059
		369.59	0.0114591
		369.645	0.0116134
		369.7	0.0117689
		369.755	0.0119254
		369.81	0.0120831
		369.865	0.0122418
		369.92	0.0124016
		369.975	0.0125625
		370.03	0.0127244
		370.085	0.0128873
		370.14	0.0130512
		370.195	0.0132161
		370.25	0.013382
		370.305	0.0135488
		370.36	0.0137165
		370.415	0.0138851
		370.47	0.0140545
		370.525	0.0142249
		370.58	0.014396
		370.635	0.014568
		370.69	0.0147407
		370.745	0.0149142
		370.8	0.0150885
		370.855	0.0152634
		370.91	0.0154391
		370.965	0.0156154
		371.02	0.0157923
		371.075	0.0159699
		371.13	0.016148
		371.185	0.0163267
		371.24	0.0165059
		371.295	0.0166856
		371.35	0.0168658
		371.405	0.0170464
		371.46	0.0172275
		371.515	0.0174089
		371.57	0.0175907
		371.625	0.0177729
		371.68	0.0179553
		371.735	0.018138
		371.79	0.018321
		371.845	0.0185042
		371.9	0.0186875
		371.955	0.018871
		372.01	0.0190547
		372.065	0.0192384
		372.12	0.0194222
		372.175	0.019606
		372.23	0.0197899
		372.285	0.0199737
		372.34	0.0201574
		372.395	0.0203411
		372.45	0.0205247
		372.505	0.0207081
		372.56	0.0208913
		372.615	0.0210743
		372.67	0.0212571
		372.725	0.0214396
		372.78	0.0216218
		372.835	0.0218037
		372.89	0.0219852
		372.945	0.0221664
		373	0.0223471
		373.055	0.0225274
		373.11	0.0227072
		373.165	0.0228865
		373.22	0.0230653
		373.275	0.0232435
		373.33	0.0234211
		373.385	0.0235981
		373.44	0.0237745
		373.495	0.0239502
		373.55	0.0241252
		373.605	0.0242995
		373.66	0.024473
		373.715	0.0246458
		373.77	0.0248178
		373.825	0.0249889
		373.88	0.0251592
		373.935	0.0253286
		373.99	0.0254971
		374.045	0.0256647
		374.1	0.0258314
		374.155	0.0259971
		374.21	0.0261618
		374.265	0.0263255
		374.32	0.0264882
		374.375	0.0266498
		374.43	0.0268104
		374.485	0.0269699
		374.54	0.0271282
		374.595	0.0272855
		374.65	0.0274416
		374.705	0.0275965
		374.76	0.0277503
		374.815	0.0279029
		374.87	0.0280543
		374.925	0.0282044
		374.98	0.0283533
		375.035	0.028501
		375.09	0.0286474
		375.145	0.0287925
		375.2	0.0289364
		375.255	0.0290789
		375.31	0.0292202
		375.365	0.0293601
		375.42	0.0294987
		375.475	0.029636
		375.53	0.0297719
		375.585	0.0299064
		375.64	0.0300396
		375.695	0.0301714
		375.75	0.0303018
		375.805	0.0304309
		375.86	0.0305585
		375.915	0.0306848
		375.97	0.0308097
		376.025	0.0309332
		376.08	0.0310552
		376.135	0.0311759
		376.19	0.0312952
		376.245	0.031413
		376.3	0.0315294
		376.355	0.0316445
		376.41	0.0317581
		376.465	0.0318703
		376.52	0.0319811
		376.575	0.0320905
		376.63	0.0321984
		376.685	0.032305
		376.74	0.0324102
		376.795	0.032514
		376.85	0.0326163
		376.905	0.0327173
		376.96	0.0328169
		377.015	0.0329151
		377.07	0.033012
		377.125	0.0331074
		377.18	0.0332015
		377.235	0.0332943
		377.29	0.0333857
		377.345	0.0334757
		377.4	0.0335644
		377.455	0.0336518
		377.51	0.0337378
		377.565	0.0338225
		377.62	0.0339059
		377.675	0.0339881
		377.73	0.0340689
		377.785	0.0341484
		377.84	0.0342267
		377.895	0.0343037
		377.95	0.0343794
		378.005	0.0344539
		378.06	0.0345272
		378.115	0.0345992
		378.17	0.03467
		378.225	0.0347396
		378.28	0.034808
		378.335	0.0348752
		378.39	0.0349412
		378.445	0.0350061
		378.5	0.0350698
		378.555	0.0351324
		378.61	0.0351938
		378.665	0.0352541
		378.72	0.0353133
		378.775	0.0353714
		378.83	0.0354284
		378.885	0.0354843
		378.94	0.0355391
		378.995	0.0355929
		379.05	0.0356456
		379.105	0.0356973
		379.16	0.0357479
		379.215	0.0357975
		379.27	0.0358462
		379.325	0.0358938
		379.38	0.0359404
		379.435	0.035986
		379.49	0.0360306
		379.545	0.0360743
		379.6	0.036117
		379.655	0.0361588
		379.71	0.0361996
		379.765	0.0362395
		379.82	0.0362785
		379.875	0.0363166
		379.93	0.0363538
		379.985	0.03639
		380.04	0.0364254
		380.095	0.0364599
		380.15	0.0364935
		380.205	0.0365263
		380.26	0.0365582
		380.315	0.0365892
		380.37	0.0366194
		380.425	0.0366488
		380.48	0.0366773
		380.535	0.036705
		380.59	0.0367319
		380.645	0.0367579
		380.7	0.0367831
		380.755	0.0368076
		380.81	0.0368312
		380.865	0.036854
		380.92	0.0368761
		380.975	0.0368973
		381.03	0.0369178
		381.085	0.0369374
		381.14	0.0369563
		381.195	0.0369745
		381.25	0.0369918
		381.305	0.0370084
		381.36	0.0370242
		381.415	0.0370392
		381.47	0.0370535
		381.525	0.037067
		381.58	0.0370798
		381.635	0.0370918
		381.69	0.037103
		381.745	0.0371135
		381.8	0.0371232
		381.855	0.0371322
		381.91	0.0371404
		381.965	0.0371479
		382.02	0.0371546
		382.075	0.0371606
		382.13	0.0371658
		382.185	0.0371702
		382.24	0.0371739
		382.295	0.0371768
		382.35	0.037179
		382.405	0.0371804
		382.46	0.037181
		382.515	0.0371809
		382.57	0.03718
		382.625	0.0371784
		382.68	0.037176
		382.735	0.0371728
		382.79	0.0371688
		382.845	0.0371641
		382.9	0.0371586
		382.955	0.0371523
		383.01	0.0371452
		383.065	0.0371374
		383.12	0.0371288
		383.175	0.0371193
		383.23	0.0371091
		383.285	0.0370981
		383.34	0.0370862
		383.395	0.0370736
		383.45	0.0370602
		383.505	0.0370459
		383.56	0.0370309
		383.615	0.037015
		383.67	0.0369983
		383.725	0.0369808
		383.78	0.0369625
		383.835	0.0369433
		383.89	0.0369233
		383.945	0.0369024
		384	0.0368808
		384.055	0.0368582
		384.11	0.0368348
		384.165	0.0368106
		384.22	0.0367855
		384.275	0.0367596
		384.33	0.0367328
		384.385	0.0367051
		384.44	0.0366766
		384.495	0.0366472
		384.55	0.0366169
		384.605	0.0365857
		384.66	0.0365537
		384.715	0.0365207
		384.77	0.0364869
		384.825	0.0364522
		384.88	0.0364166
		384.935	0.0363801
		384.99	0.0363427
		385.045	0.0363044
		385.1	0.0362652
		385.155	0.0362251
		385.21	0.0361841
		385.265	0.0361421
		385.32	0.0360993
		385.375	0.0360555
		385.43	0.0360108
		385.485	0.0359652
		385.54	0.0359187
		385.595	0.0358713
		385.65	0.0358229
		385.705	0.0357736
		385.76	0.0357234
		385.815	0.0356722
		385.87	0.0356202
		385.925	0.0355671
		385.98	0.0355132
		386.035	0.0354583
		386.09	0.0354025
		386.145	0.0353458
		386.2	0.0352881
		386.255	0.0352295
		386.31	0.03517
		386.365	0.0351096
		386.42	0.0350482
		386.475	0.0349859
		386.53	0.0349226
		386.585	0.0348585
		386.64	0.0347934
		386.695	0.0347274
		386.75	0.0346604
		386.805	0.0345926
		386.86	0.0345238
		386.915	0.0344541
		386.97	0.0343835
		387.025	0.034312
		387.08	0.0342395
		387.135	0.0341662
		387.19	0.034092
		387.245	0.0340169
		387.3	0.0339408
		387.355	0.0338639
		387.41	0.0337861
		387.465	0.0337074
		387.52	0.0336278
		387.575	0.0335474
		387.63	0.0334661
		387.685	0.0333839
		387.74	0.0333009
		387.795	0.033217
		387.85	0.0331322
		387.905	0.0330466
		387.96	0.0329602
		388.015	0.0328729
		388.07	0.0327848
		388.125	0.0326959
		388.18	0.0326062
		388.235	0.0325157
		388.29	0.0324243
		388.345	0.0323322
		388.4	0.0322393
		388.455	0.0321456
		388.51	0.0320511
		388.565	0.0319559
		388.62	0.0318599
		388.675	0.0317632
		388.73	0.0316657
		388.785	0.0315675
		388.84	0.0314686
		388.895	0.031369
		388.95	0.0312686
		389.005	0.0311676
		389.06	0.0310659
		389.115	0.0309635
		389.17	0.0308604
		389.225	0.0307567
		389.28	0.0306523
		389.335	0.0305473
		389.39	0.0304417
		389.445	0.0303354
		389.5	0.0302286
		389.555	0.0301211
		389.61	0.0300131
		389.665	0.0299045
		389.72	0.0297953
		389.775	0.0296856
		389.83	0.0295754
		389.885	0.0294646
		389.94	0.0293533
		389.995	0.0292415
		390.05	0.0291292
		390.105	0.0290164
		390.16	0.0289031
		390.215	0.0287894
		390.27	0.0286753
		390.325	0.0285607
		390.38	0.0284457
		390.435	0.0283303
		390.49	0.0282145
		390.545	0.0280983
		390.6	0.0279818
		390.655	0.0278649
		390.71	0.0277476
		390.765	0.02763
		390.82	0.0275121
		390.875	0.027394
		390.93	0.0272755
		390.985	0.0271567
		391.04	0.0270377
		391.095	0.0269184
		391.15	0.0267989
		391.205	0.0266792
		391.26	0.0265592
		391.315	0.0264391
		391.37	0.0263188
		391.425	0.0261983
		391.48	0.0260776
		391.535	0.0259569
		391.59	0.0258359
		391.645	0.0257149
		391.7	0.0255938
		391.755	0.0254726
		391.81	0.0253513
		391.865	0.02523
		391.92	0.0251086
		391.975	0.0249872
		392.03	0.0248657
		392.085	0.0247443
		392.14	0.0246229
		392.195	0.0245015
		392.25	0.0243801
		392.305	0.0242588
		392.36	0.0241375
		392.415	0.0240163
		392.47	0.0238953
		392.525	0.0237743
		392.58	0.0236534
		392.635	0.0235327
		392.69	0.0234121
		392.745	0.0232916
		392.8	0.0231713
		392.855	0.0230513
		392.91	0.0229313
		392.965	0.0228117
		393.02	0.0226922
		393.075	0.0225729
		393.13	0.0224539
		393.185	0.0223352
		393.24	0.0222167
		393.295	0.0220985
		393.35	0.0219806
		393.405	0.021863
		393.46	0.0217457
		393.515	0.0216287
		393.57	0.0215121
		393.625	0.0213958
		393.68	0.0212799
		393.735	0.0211644
		393.79	0.0210492
		393.845	0.0209344
		393.9	0.02082
		393.955	0.0207061
		394.01	0.0205925
		394.065	0.0204794
		394.12	0.0203668
		394.175	0.0202545
		394.23	0.0201428
		394.285	0.0200315
		394.34	0.0199207
		394.395	0.0198104
		394.45	0.0197006
		394.505	0.0195912
		394.56	0.0194825
		394.615	0.0193742
		394.67	0.0192664
		394.725	0.0191592
		394.78	0.0190526
		394.835	0.0189465
		394.89	0.018841
		394.945	0.018736
		395	0.0186316
		395.055	0.0185278
		395.11	0.0184246
		395.165	0.0183219
		395.22	0.0182199
		395.275	0.0181185
		395.33	0.0180177
		395.385	0.0179175
		395.44	0.0178179
		395.495	0.017719
		395.55	0.0176207
		395.605	0.017523
		395.66	0.017426
		395.715	0.0173296
		395.77	0.0172338
		395.825	0.0171388
		395.88	0.0170443
		395.935	0.0169506
		395.99	0.0168575
		396.045	0.0167651
		396.1	0.0166733
		396.155	0.0165823
		396.21	0.0164918
		396.265	0.0164021
		396.32	0.0163131
		396.375	0.0162247
		396.43	0.016137
		396.485	0.0160501
		396.54	0.0159637
		396.595	0.0158781
		396.65	0.0157932
		396.705	0.0157089
		396.76	0.0156254
		396.815	0.0155425
		396.87	0.0154603
		396.925	0.0153789
		396.98	0.0152981
		397.035	0.015218
		397.09	0.0151386
		397.145	0.0150598
		397.2	0.0149818
		397.255	0.0149044
		397.31	0.0148278
		397.365	0.0147518
		397.42	0.0146765
		397.475	0.0146019
		397.53	0.0145279
		397.585	0.0144546
		397.64	0.014382
		397.695	0.0143101
		397.75	0.0142388
		397.805	0.0141682
		397.86	0.0140983
		397.915	0.014029
		397.97	0.0139604
		398.025	0.0138924
		398.08	0.013825
		398.135	0.0137584
		398.19	0.0136923
		398.245	0.0136269
		398.3	0.0135622
		398.355	0.013498
		398.41	0.0134345
		398.465	0.0133716
		398.52	0.0133093
		398.575	0.0132477
		398.63	0.0131866
		398.685	0.0131261
		398.74	0.0130663
		398.795	0.013007
		398.85	0.0129483
		398.905	0.0128902
		398.96	0.0128327
		399.015	0.0127757
		399.07	0.0127193
		399.125	0.0126635
		399.18	0.0126082
		399.235	0.0125534
		399.29	0.0124992
		399.345	0.0124456
		399.4	0.0123924
		399.455	0.0123398
		399.51	0.0122877
		399.565	0.0122361
		399.62	0.0121851
		399.675	0.0121345
		399.73	0.0120844
		399.785	0.0120348
		399.84	0.0119857
		399.895	0.011937
		399.95	0.0118889
		400.005	0.0118411
		400.06	0.0117939
		400.115	0.011747
		400.17	0.0117007
		400.225	0.0116547
		400.28	0.0116092
		400.335	0.0115641
		400.39	0.0115194
		400.445	0.0114752
		400.5	0.0114313
		400.555	0.0113878
		400.61	0.0113447
		400.665	0.011302
		400.72	0.0112597
		400.775	0.0112177
		400.83	0.0111761
		400.885	0.0111349
		400.94	0.011094
		400.995	0.0110534
		401.05	0.0110132
		401.105	0.0109733
		401.16	0.0109337
		401.215	0.0108945
		401.27	0.0108555
		401.325	0.0108169
		401.38	0.0107785
		401.435	0.0107405
		401.49	0.0107027
		401.545	0.0106652
		401.6	0.010628
		401.655	0.010591
		401.71	0.0105544
		401.765	0.0105179
		401.82	0.0104817
		401.875	0.0104458
		401.93	0.0104101
		401.985	0.0103746
		402.04	0.0103393
		402.095	0.0103043
		402.15	0.0102695
		402.205	0.0102348
		402.26	0.0102004
		402.315	0.0101662
		402.37	0.0101322
		402.425	0.0100983
		402.48	0.0100647
		402.535	0.0100312
		402.59	0.00999789
		402.645	0.00996475
		402.7	0.00993177
		402.755	0.00989894
		402.81	0.00986627
		402.865	0.00983374
		402.92	0.00980136
		402.975	0.00976912
		403.03	0.00973701
		403.085	0.00970502
		403.14	0.00967317
		403.195	0.00964143
		403.25	0.00960981
		403.305	0.0095783
		403.36	0.0095469
		403.415	0.00951561
		403.47	0.00948442
		403.525	0.00945332
		403.58	0.00942232
		403.635	0.00939141
		403.69	0.00936058
		403.745	0.00932984
		403.8	0.00929918
		403.855	0.00926859
		403.91	0.00923808
		403.965	0.00920764
		404.02	0.00917727
		404.075	0.00914696
		404.13	0.00911671
		404.185	0.00908653
		404.24	0.0090564
		404.295	0.00902632
		404.35	0.0089963
		404.405	0.00896633
		404.46	0.0089364
		404.515	0.00890652
		404.57	0.00887668
		404.625	0.00884689
		404.68	0.00881713
		404.735	0.00878741
		404.79	0.00875772
		404.845	0.00872807
		404.9	0.00869845
		404.955	0.00866886
		405.01	0.0086393
		405.065	0.00860977
		405.12	0.00858026
		405.175	0.00855077
		405.23	0.00852132
		405.285	0.00849188
		405.34	0.00846246
		405.395	0.00843307
		405.45	0.00840369
		405.505	0.00837433
		405.56	0.00834499
		405.615	0.00831567
		405.67	0.00828636
		405.725	0.00825707
		405.78	0.00822779
		405.835	0.00819853
		405.89	0.00816928
		405.945	0.00814005
		406	0.00811083
		406.055	0.00808162
		406.11	0.00805242
		406.165	0.00802324
		406.22	0.00799407
		406.275	0.00796491
		406.33	0.00793576
		406.385	0.00790663
		406.44	0.00787751
		406.495	0.0078484
		406.55	0.0078193
		406.605	0.00779021
		406.66	0.00776114
		406.715	0.00773205
		406.77	0.00770301
		406.825	0.00767398
		406.88	0.00764496
		406.935	0.00761596
		406.99	0.00758698
		407.045	0.00755801
		407.1	0.00752905
		407.155	0.00750012
		407.21	0.0074712
		407.265	0.00744229
		407.32	0.00741341
		407.375	0.00738455
		407.43	0.0073557
		407.485	0.00732688
		407.54	0.00729807
		407.595	0.00726929
		407.65	0.00724053
		407.705	0.0072118
		407.76	0.00718308
		407.815	0.0071544
		407.87	0.00712574
		407.925	0.0070971
		407.98	0.00706849
		408.035	0.00703992
		408.09	0.00701137
		408.145	0.00698285
		408.2	0.00695436
		408.255	0.0069259
		408.31	0.00689748
		408.365	0.00686909
		408.42	0.00684073
		408.475	0.00681241
		408.53	0.00678413
		408.585	0.00675588
		408.64	0.00672764
		408.695	0.00669947
		408.75	0.00667134
		408.805	0.00664325
		408.86	0.00661521
		408.915	0.00658721
		408.97	0.00655925
		409.025	0.00653133
		409.08	0.00650347
		409.135	0.00647561
		409.19	0.00644783
		409.245	0.00642011
		409.3	0.00639243
		409.355	0.0063648
		409.41	0.00633723
		409.465	0.0063097
		409.52	0.00628223
		409.575	0.00625481
		409.63	0.00622744
		409.685	0.00620013
		409.74	0.00617288
		409.795	0.00614568
		409.85	0.00611854
		409.905	0.00609145
		409.96	0.00606443
		410.015	0.00603746
		410.07	0.00601056
		410.125	0.00598371
		410.18	0.00595693
		410.235	0.00593021
		410.29	0.00590355
		410.345	0.00587695
		410.4	0.00585042
		410.455	0.00582396
		410.51	0.00579755
		410.565	0.00577122
		410.62	0.00574495
		410.675	0.00571875
		410.73	0.00569261
		410.785	0.00566655
		410.84	0.00564055
		410.895	0.00561462
		410.95	0.00558876
		411.005	0.00556297
		411.06	0.00553724
		411.115	0.00551159
		411.17	0.00548602
		411.225	0.00546051
		411.28	0.00543507
		411.335	0.00540971
		411.39	0.00538441
		411.445	0.00535919
		411.5	0.00533405
		411.555	0.00530897
		411.61	0.00528397
		411.665	0.00525905
		411.72	0.0052342
		411.775	0.00520942
		411.83	0.00518471
		411.885	0.00516008
		411.94	0.00513553
		411.995	0.00511104
		412.05	0.00508664
		412.105	0.00506231
		412.16	0.00503805
		412.215	0.00501387
		412.27	0.00498976
		412.325	0.00496573
		412.38	0.00494177
		412.435	0.00491789
		412.49	0.00489409
		412.545	0.00487036
		412.6	0.0048467
		412.655	0.00482312
		412.71	0.00479961
		412.765	0.00477618
		412.82	0.00475283
		412.875	0.00472954
		412.93	0.00470634
		412.985	0.00468321
		413.04	0.00466015
		413.095	0.00463716
		413.15	0.00461426
		413.205	0.00459142
		413.26	0.00456866
		413.315	0.00454597
		413.37	0.00452336
		413.425	0.00450082
		413.48	0.00447831
		413.535	0.00445592
		413.59	0.0044336
		413.645	0.00441135
		413.7	0.00438918
		413.755	0.00436707
		413.81	0.00434504
		413.865	0.00432308
		413.92	0.00430119
		413.975	0.00427937
		414.03	0.00425763
		414.085	0.00423591
		414.14	0.00421431
		414.195	0.00419277
		414.25	0.00417131
		414.305	0.00414991
		414.36	0.00412858
		414.415	0.00410732
		414.47	0.00408613
		414.525	0.00406497
		414.58	0.00404392
		414.635	0.00402293
		414.69	0.00400202
		414.745	0.00398117
		414.8	0.00396038
		414.855	0.00393966
		414.91	0.00391901
		414.965	0.00389842
		415.02	0.0038779
		415.075	0.00385745
		415.13	0.00383706
		415.185	0.00381673
		415.24	0.00379647
		415.295	0.00377627
		415.35	0.00375614
		415.405	0.00373607
		415.46	0.00371606
		415.515	0.00369611
		415.57	0.00367623
		415.625	0.00365641
		415.68	0.00363665
		415.735	0.00361696
		415.79	0.00359732
		415.845	0.00357775
		415.9	0.00355824
		415.955	0.00353878
		416.01	0.00351939
		416.065	0.00350006
		416.12	0.00348079
		416.175	0.00346158
		416.23	0.00344243
		416.285	0.00342333
		416.34	0.00340426
		416.395	0.00338529
		416.45	0.00336637
		416.505	0.00334751
		416.56	0.00332871
		416.615	0.00330997
		416.67	0.00329129
		416.725	0.00327266
		416.78	0.00325409
		416.835	0.00323558
		416.89	0.00321712
		416.945	0.00319872
		417	0.00318038
		417.055	0.00316209
		417.11	0.00314386
		417.165	0.00312568
		417.22	0.00310756
		417.275	0.0030895
		417.33	0.00307146
		417.385	0.0030535
		417.44	0.00303561
		417.495	0.00301773
		417.55	0.00299991
		417.605	0.00298218
		417.66	0.00296451
		417.715	0.00294689
		417.77	0.00292932
		417.825	0.00291181
		417.88	0.00289435
		417.935	0.00287695
		417.99	0.0028596
		418.045	0.00284231
		418.1	0.00282507
		418.155	0.00280788
		418.21	0.00279075
		418.265	0.00277367
		418.32	0.00275665
		418.375	0.00273968
		418.43	0.00272276
		418.485	0.0027059
		418.54	0.00268909
		418.595	0.00267233
		418.65	0.00265563
		418.705	0.00263898
		418.76	0.00262238
		418.815	0.00260584
		418.87	0.00258935
		418.925	0.00257292
		418.98	0.00255654
		419.035	0.00254021
		419.09	0.00252394
		419.145	0.00250772
		419.2	0.00249156
		419.255	0.00247544
		419.31	0.00245939
		419.365	0.00244338
		419.42	0.00242744
		419.475	0.00241154
		419.53	0.0023957
		419.585	0.00237991
		419.64	0.00236418
		419.695	0.0023485
		419.75	0.00233288
		419.805	0.00231731
		419.86	0.00230179
		419.915	0.00228633
		419.97	0.00227093
		420.025	0.00225558
		420.08	0.00224028
		420.135	0.00222504
		420.19	0.00220985
		420.245	0.00219472
		420.3	0.00217965
		420.355	0.00216463
		420.41	0.00214966
		420.465	0.00213475
		420.52	0.0021199
		420.575	0.0021051
		420.63	0.00209032
		420.685	0.00207564
		420.74	0.00206101
		420.795	0.00204644
		420.85	0.00203192
		420.905	0.00201746
		420.96	0.00200306
		421.015	0.00198871
		421.07	0.00197442
		421.125	0.00196019
		421.18	0.00194601
		421.235	0.00193189
		421.29	0.00191779
		421.345	0.00190378
		421.4	0.0018898
		421.455	0.00187591
		421.51	0.00186208
		421.565	0.00184827
		421.62	0.00183456
		421.675	0.0018209
		421.73	0.0018073
		421.785	0.00179376
		421.84	0.00178028
		421.895	0.00176686
		421.95	0.00175349
		422.005	0.00174018
		422.06	0.00172694
		422.115	0.00171375
		422.17	0.00170061
		422.225	0.00168754
		422.28	0.00167453
		422.335	0.00166158
		422.39	0.00164868
		422.445	0.00163584
		422.5	0.00162307
		422.555	0.00161035
		422.61	0.0015977
		422.665	0.0015851
		422.72	0.00157256
		422.775	0.00156008
		422.83	0.00154767
		422.885	0.00153531
		422.94	0.00152301
		422.995	0.00151074
		423.05	0.00149856
		423.105	0.00148644
		423.16	0.00147439
		423.215	0.00146239
		423.27	0.00145046
		423.325	0.00143859
		423.38	0.00142677
		423.435	0.00141502
		423.49	0.00140333
		423.545	0.0013917
		423.6	0.00138013
		423.655	0.00136862
		423.71	0.00135717
		423.765	0.00134574
		423.82	0.00133442
		423.875	0.00132315
		423.93	0.00131195
		423.985	0.00130081
		424.04	0.00128973
		424.095	0.00127871
		424.15	0.00126775
		424.205	0.00125685
		424.26	0.00124601
		424.315	0.00123523
		424.37	0.00122452
		424.425	0.00121387
		424.48	0.00120327
		424.535	0.00119274
		424.59	0.00118227
		424.645	0.00117186
		424.7	0.00116151
		424.755	0.00115122
		424.81	0.001141
		424.865	0.00113083
		424.92	0.00112073
		424.975	0.00111068
		425.03	0.0011007
		425.085	0.00109078
		425.14	0.00108092
		425.195	0.00107112
		425.25	0.00106138
		425.305	0.0010517
		425.36	0.00104208
		425.415	0.00103253
		425.47	0.00102303
		425.525	0.00101359
		425.58	0.00100422
		425.635	0.0009949
		425.69	0.000985645
		425.745	0.000976449
		425.8	0.000967313
		425.855	0.000958238
		425.91	0.000949222
		425.965	0.000940266
		426.02	0.00093137
		426.075	0.000922533
		426.13	0.000913756
		426.185	0.000905038
		426.24	0.00089638
		426.295	0.00088778
		426.35	0.00087924
		426.405	0.000870759
		426.46	0.000862336
		426.515	0.000853972
		426.57	0.000845667
		426.625	0.00083742
		426.68	0.000829231
		426.735	0.0008211
		426.79	0.000813028
		426.845	0.000805013
		426.9	0.000797056
		426.955	0.000789157
		427.01	0.000781315
		427.065	0.00077353
		427.12	0.000765802
		427.175	0.000758132
		427.23	0.000750518
		427.285	0.000742961
		427.34	0.00073546
		427.395	0.000728015
		427.45	0.000720627
		427.505	0.000713294
		427.56	0.000706018
		427.615	0.000698797
		427.67	0.000691631
		427.725	0.00068452
		427.78	0.000677465
		427.835	0.000670464
		427.89	0.000663518
		427.945	0.000656627
		428	0.000649789
		428.055	0.000643006
		428.11	0.000636277
		428.165	0.000629601
		428.22	0.000622979
		428.275	0.00061641
		428.33	0.000609894
		428.385	0.00060343
		428.44	0.00059702
		428.495	0.000590662
		428.55	0.000584356
		428.605	0.000578102
		428.66	0.000571899
		428.715	0.000565749
		428.77	0.000559649
		428.825	0.000553601
		428.88	0.000547603
		428.935	0.000541656
		428.99	0.000535759
		429.045	0.000529913
		429.1	0.000524116
		429.155	0.00051837
		429.21	0.000512672
		429.265	0.000507024
		429.32	0.000501425
		429.375	0.000495874
		429.43	0.000490372
		429.485	0.000484918
		429.54	0.000479476
		429.595	0.000474119
		429.65	0.000468811
		429.705	0.000463549
		429.76	0.000458334
		429.815	0.000453166
		429.87	0.000448044
		429.925	0.000442969
		429.98	0.000437939
		430.035	0.000432956
		430.09	0.000428017
		430.145	0.000423124
		430.2	0.000418276
		430.255	0.000413473
		430.31	0.000408714
		430.365	0.000403999
		430.42	0.000399328
		430.475	0.000394701
		430.53	0.000390117
		430.585	0.000385576
		430.64	0.000381078
		430.695	0.000376623
		430.75	0.000372211
		430.805	0.000367803
		430.86	0.000363476
		430.915	0.00035919
		430.97	0.000354945
		431.025	0.000350741
		431.08	0.000346578
		431.135	0.000342455
		431.19	0.000338373
		431.245	0.000334331
		431.3	0.000330329
		431.355	0.000326366
		431.41	0.000322442
		431.465	0.000318557
		431.52	0.000314711
		431.575	0.000310903
		431.63	0.000307133
		431.685	0.000303402
		431.74	0.000299708
		431.795	0.000296051
		431.85	0.000292431
		431.905	0.000288849
		431.96	0.000285302
		432.015	0.000281793
		432.07	0.000278319
		432.125	0.000274881
		432.18	0.000271478
		432.235	0.000268111
		432.29	0.000264779
		432.345	0.000261482
		432.4	0.000258219
		432.455	0.00025499
		432.51	0.000251796
		432.565	0.000248635
		432.62	0.000245507
		432.675	0.000242413
		432.73	0.000239352
		432.785	0.000236323
		432.84	0.000233327
		432.895	0.000230363
		432.95	0.000227431
		433.005	0.000224531
		433.06	0.000221662
		433.115	0.000218824
		433.17	0.000216018
		433.225	0.000213241
		433.28	0.000210496
		433.335	0.00020778
		433.39	0.000205095
		433.445	0.000202439
		433.5	0.000199812
		433.555	0.000197215
		433.61	0.000194647
		433.665	0.000192107
		433.72	0.000189596
		433.775	0.000187113
		433.83	0.000184658
		433.885	0.00018223
		433.94	0.00017983
		433.995	0.000177458
		434.05	0.000175112
		434.105	0.000172793
		434.16	0.000170501
		434.215	0.000168235
		434.27	0.000165995
		434.325	0.000163781
		434.38	0.000161593
		434.435	0.00015943
		434.49	0.000157292
		434.545	0.000155179
		434.6	0.00015309
		434.655	0.000151027
		434.71	0.000148987
		434.765	0.000146971
		434.82	0.000144979
		434.875	0.000143011
		434.93	0.000141066
		434.985	0.000139144
		435.04	0.000137245
		435.095	0.000135369
		435.15	0.000133515
		435.205	0.000131684
		435.26	0.000129874
		435.315	0.000128087
		435.37	0.000126321
		435.425	0.000124576
		435.48	0.000122853
		435.535	0.00012115
		435.59	0.000119469
		435.645	0.000117808
		435.7	0.000116167
		435.755	0.000114546
		435.81	0.000112946
		435.865	0.000111365
		435.92	0.000109804
		435.975	0.000108262
		436.03	0.00010674
		436.085	0.000105236
		436.14	0.000103751
		436.195	0.000102285
		436.25	0.000100837
		436.305	9.94072e-05
		436.36	9.79956e-05
		436.415	9.66018e-05
		436.47	9.52256e-05
		436.525	9.38669e-05
		436.58	9.25256e-05
		436.635	9.12013e-05
		436.69	8.98939e-05
		436.745	8.86033e-05
		436.8	8.73292e-05
		436.855	8.60715e-05
		436.91	8.483e-05
		436.965	8.36046e-05
		437.02	8.2395e-05
		437.075	8.12011e-05
		437.13	8.00227e-05
		437.185	7.88597e-05
		437.24	7.77118e-05
		437.295	7.6579e-05
		437.35	7.5461e-05
		437.405	7.43577e-05
		437.46	7.32689e-05
		437.515	7.21945e-05
		437.57	7.11343e-05
		437.625	7.00881e-05
		437.68	6.90558e-05
		437.735	6.80372e-05
		437.79	6.70322e-05
		437.845	6.60406e-05
		437.9	6.50623e-05
		437.955	6.40971e-05
		438.01	6.31449e-05
		438.065	6.22054e-05
		438.12	6.12787e-05
		438.175	6.03644e-05
		438.23	5.94626e-05
		438.285	5.85729e-05
		438.34	5.76954e-05
		438.395	5.68298e-05
		438.45	5.5976e-05
		438.505	5.51339e-05
		438.56	5.43033e-05
		438.615	5.34842e-05
		438.67	5.26762e-05
		438.725	5.18794e-05
		438.78	5.10936e-05
		438.835	5.03187e-05
		438.89	4.95545e-05
		438.945	4.88009e-05
		439	4.80578e-05
		439.055	4.7325e-05
		439.11	4.66024e-05
		439.165	4.589e-05
		439.22	4.51875e-05
		439.275	4.44949e-05
		439.33	4.3812e-05
		439.385	4.31387e-05
		439.44	4.2475e-05
		439.495	4.18206e-05
		439.55	4.11754e-05
		439.605	4.05395e-05
		439.66	3.99125e-05
		439.715	3.92945e-05
		439.77	3.86853e-05
		439.825	3.80847e-05
		439.88	3.74928e-05
		439.935	3.69094e-05
		439.99	3.63343e-05
		440.045	3.57675e-05
		440.1	3.52088e-05
		440.155	3.46583e-05
		440.21	3.41156e-05
		440.265	3.35809e-05
		440.32	3.30538e-05
		440.375	3.25345e-05
		440.43	3.20227e-05
		440.485	3.15183e-05
		440.54	3.10213e-05
		440.595	3.05316e-05
		440.65	3.0049e-05
		440.705	2.95736e-05
		440.76	2.91051e-05
		440.815	2.86435e-05
		440.87	2.81887e-05
		440.925	2.77406e-05
		440.98	2.72991e-05
		441.035	2.68642e-05
		441.09	2.64357e-05
		441.145	2.60136e-05
		441.2	2.55978e-05
		441.255	2.51882e-05
		441.31	2.47846e-05
		441.365	2.43872e-05
		441.42	2.39956e-05
		441.475	2.361e-05
		441.53	2.32301e-05
		441.585	2.28559e-05
		441.64	2.24874e-05
		441.695	2.21244e-05
		441.75	2.17669e-05
		441.805	2.14148e-05
		441.86	2.10681e-05
		441.915	2.07266e-05
		441.97	2.03903e-05
		442.025	2.00591e-05
		442.08	1.9733e-05
		442.135	1.94118e-05
		442.19	1.90956e-05
		442.245	1.87841e-05
		442.3	1.84775e-05
		442.355	1.81756e-05
		442.41	1.78783e-05
		442.465	1.75856e-05
		442.52	1.72973e-05
		442.575	1.70136e-05
		442.63	1.67342e-05
		442.685	1.64591e-05
		442.74	1.61884e-05
		442.795	1.59218e-05
		442.85	1.56593e-05
		442.905	1.54009e-05
		442.96	1.51466e-05
		443.015	1.48962e-05
		443.07	1.46498e-05
		443.125	1.44072e-05
		443.18	1.41683e-05
		443.235	1.39333e-05
		443.29	1.37019e-05
		443.345	1.34742e-05
		443.4	1.325e-05
		443.455	1.30294e-05
		443.51	1.28123e-05
		443.565	1.25986e-05
		443.62	1.23882e-05
		443.675	1.21812e-05
		443.73	1.19775e-05
		443.785	1.1777e-05
		443.84	1.15798e-05
		443.895	1.13856e-05
		443.95	1.11946e-05
		444.005	1.10066e-05
		444.06	1.08216e-05
		444.115	1.06395e-05
		444.17	1.04604e-05
		444.225	1.02841e-05
		444.28	1.01107e-05
		444.335	9.94006e-06
		444.39	9.77217e-06
		444.445	9.60698e-06
		444.5	9.44445e-06
		444.555	9.28455e-06
		444.61	9.12724e-06
		444.665	8.97246e-06
		444.72	8.8202e-06
		444.775	8.67041e-06
		444.83	8.52304e-06
		444.885	8.37807e-06
		444.94	8.23547e-06
		444.995	8.09518e-06
		445.05	7.95718e-06
		445.105	7.82143e-06
		445.16	7.68791e-06
		445.215	7.55656e-06
		445.27	7.42737e-06
		445.325	7.30029e-06
		445.38	7.1753e-06
		445.435	7.05237e-06
		445.49	6.93145e-06
		445.545	6.81253e-06
		445.6	6.69556e-06
		445.655	6.58052e-06
		445.71	6.46739e-06
		445.765	6.35612e-06
		445.82	6.24669e-06
		445.875	6.13908e-06
		445.93	6.03325e-06
		445.985	5.92917e-06
		446.04	5.82682e-06
		446.095	5.72618e-06
		446.15	5.62721e-06
		446.205	5.52989e-06
		446.26	5.43419e-06
		446.315	5.34008e-06
		446.37	5.24755e-06
		446.425	5.15657e-06
		446.48	5.0671e-06
		446.535	4.97914e-06
		446.59	4.89265e-06
		446.645	4.80761e-06
		446.7	4.724e-06
		446.755	4.64179e-06
		446.81	4.56097e-06
		446.865	4.48151e-06
		446.92	4.40339e-06
		446.975	4.32658e-06
		447.03	4.25107e-06
		447.085	4.17684e-06
		447.14	4.10386e-06
		447.195	4.03212e-06
		447.25	3.96159e-06
		447.305	3.89226e-06
		447.36	3.8241e-06
		447.415	3.7571e-06
		447.47	3.69124e-06
		447.525	3.6265e-06
		447.58	3.56286e-06
		447.635	3.5003e-06
		447.69	3.43881e-06
		447.745	3.37837e-06
		447.8	3.31896e-06
		447.855	3.26057e-06
		447.91	3.20318e-06
		447.965	3.14676e-06
		448.02	3.09131e-06
		448.075	3.03682e-06
		448.13	2.98325e-06
		448.185	2.93061e-06
		448.24	2.87887e-06
		448.295	2.82802e-06
		448.35	2.77804e-06
		448.405	2.72893e-06
		448.46	2.68066e-06
		448.515	2.63322e-06
		448.57	2.5866e-06
		448.625	2.54078e-06
		448.68	2.49576e-06
		448.735	2.45151e-06
		448.79	2.40803e-06
		448.845	2.3653e-06
		448.9	2.28647e-06
		448.955	2.24605e-06
		449.01	2.20634e-06
		449.065	2.1673e-06
		449.12	2.12895e-06
		449.175	2.09125e-06
		449.23	2.05421e-06
		449.285	2.01781e-06
		449.34	1.98203e-06
		449.395	1.94688e-06
		449.45	1.91233e-06
		449.505	1.87839e-06
		449.56	1.84503e-06
		449.615	1.81225e-06
		449.67	1.78004e-06
		449.725	1.74839e-06
		449.78	1.71729e-06
		449.835	1.68674e-06
		449.89	1.65671e-06
		449.945	1.62721e-06
[truncated: 1 more rows]

[truncated: 21 more sheets: PlotDat11, PlotDat12, PlotDat13, PlotDat14, PlotDat15, PlotDat16, PlotDat17, PlotDat18, PlotDat19, PlotDat20, PlotDat21, PlotDat22, PlotDat23, PlotDat24, PlotDat25, PlotDat26, PlotDat27, PlotDat28, PlotDat29, data …]
